# Supplementary material for: Prelinguistic human infants and great apes show different communicative strategies in a triadic request situation
Source: PLoS One. 2017 Apr 6;12(4):e0175227. doi: 10.1371/journal.pone.0175227 (PMC5383261; doi:10.1371/journal.pone.0175227)
Supplement: S1 Dataset — (XLSX) [file pone.0175227.s001.xlsx]

## Sheet: rawData
subj	group	species	sex	age	exp	exp.sex	sess	trial	cond.num	cond	exp_ori	relPos	exp.pos	reward	type	what	pos.hor	distance	subj.dir	attentive	action.dir	exec.part	st.min	st.sec	st.fr	en.min	en.sec	en.fr	rel.st	rel.en	comment
229151	Human	Human	female	596	Astrid	female	1	1	4	AD	Away	different	left	right	position	start	1	arm	1	1	0	unknown	5	54	17	6	12	19	0	18.12
229151	Human	Human	female	596	Astrid	female	1	1	4	AD	Away	different	left	right	visual	shake head	1	arm	1	1	4	unknown	5	59	0	6	1	13	4.32	6.88
229151	Human	Human	female	596	Astrid	female	1	1	4	AD	Away	different	left	right	auditory	vocalization	1	arm	1	1	4	unknown	5	59	12	5	59	21	4.8	5.2
229151	Human	Human	female	596	Astrid	female	1	1	4	AD	Away	different	left	right	auditory	vocalization	1	arm	1	1	4	unknown	6	1	6	6	1	15	6.56	6.96
229151	Human	Human	female	596	Astrid	female	1	1	4	AD	Away	different	left	right	position	leave	1	close	2	1	0	unknown	6	12	20	6	14	16	18.12	20
229151	Human	Human	female	596	Astrid	female	1	2	1	TS	Towards	same	left	left	position	start	1	arm	1	1	0	unknown	8	34	16	8	41	20	0	7.2
229151	Human	Human	female	596	Astrid	female	1	2	1	TS	Towards	same	left	left	visual	point	1	arm	1	1	1	unknown	8	34	16	8	35	20	0	1.2
229151	Human	Human	female	596	Astrid	female	1	2	1	TS	Towards	same	left	left	visual	point	1	arm	1	1	1	unknown	8	36	14	8	41	24	1.92	7.36
229151	Human	Human	female	596	Astrid	female	1	2	1	TS	Towards	same	left	left	auditory	vocalization	1	arm	1	1	4	unknown	8	36	18	8	37	18	2.08	3.12	verbal ref (da)
229151	Human	Human	female	596	Astrid	female	1	2	1	TS	Towards	same	left	left	auditory	vocalization	1	arm	1	1	4	unknown	8	38	23	8	39	21	4.28	5.24	verbal ref (da)
229151	Human	Human	female	596	Astrid	female	1	2	1	TS	Towards	same	left	left	auditory	vocalization	1	arm	1	1	4	unknown	8	40	12	8	41	9	5.84	6.76	verbal ref (da)
229151	Human	Human	female	596	Astrid	female	1	2	1	TS	Towards	same	left	left	position	turn	1	arm	4	0	0	unknown	8	41	21	8	43	23	7.2	9.32
229151	Human	Human	female	596	Astrid	female	1	2	1	TS	Towards	same	left	left	auditory	vocalization	1	arm	4	0	4	unknown	8	42	3	8	43	6	7.48	8.64	verbal ref (da)
229151	Human	Human	female	596	Astrid	female	1	2	1	TS	Towards	same	left	left	position	turn	1	arm	1	1	0	unknown	8	43	24	8	52	13	9.32	17.92
229151	Human	Human	female	596	Astrid	female	1	2	1	TS	Towards	same	left	left	auditory	vocalization	1	arm	1	1	4	unknown	8	43	24	8	44	24	9.32	10.36	verbal ref (da)
229151	Human	Human	female	596	Astrid	female	1	2	1	TS	Towards	same	left	left	visual	point	1	arm	1	1	1	unknown	8	44	2	8	54	15	9.44	20
229151	Human	Human	female	596	Astrid	female	1	2	1	TS	Towards	same	left	left	auditory	vocalization	1	arm	1	1	4	unknown	8	45	10	8	46	7	10.76	11.68	verbal ref (da)
229151	Human	Human	female	596	Astrid	female	1	2	1	TS	Towards	same	left	left	auditory	vocalization	1	arm	1	1	4	unknown	8	48	6	8	48	13	13.6	13.92
229151	Human	Human	female	596	Astrid	female	1	2	1	TS	Towards	same	left	left	auditory	vocalization	1	arm	1	1	4	unknown	8	48	23	8	49	11	14.28	14.84	verbal ref (da)
229151	Human	Human	female	596	Astrid	female	1	2	1	TS	Towards	same	left	left	auditory	vocalization	1	arm	1	1	4	unknown	8	49	22	8	50	21	15.24	16.24	verbal ref (dada)
229151	Human	Human	female	596	Astrid	female	1	2	1	TS	Towards	same	left	left	auditory	vocalization	1	arm	1	1	4	unknown	8	51	0	8	52	1	16.36	17.44	verbal ref (da)
229151	Human	Human	female	596	Astrid	female	1	2	1	TS	Towards	same	left	left	position	turn	1	arm	4	0	0	unknown	8	52	14	8	54	15	17.92	20
229151	Human	Human	female	596	Astrid	female	1	2	1	TS	Towards	same	left	left	auditory	vocalization	1	arm	4	0	4	unknown	8	52	16	8	53	9	18	18.76	verbal ref (da)
229151	Human	Human	female	596	Astrid	female	1	3	3	AS	Away	same	right	right	position	start	1	arm	1	1	0	unknown	10	47	16	10	48	5	0	0.6
229151	Human	Human	female	596	Astrid	female	1	3	3	AS	Away	same	right	right	position	turn	1	arm	4	0	0	unknown	10	48	6	10	49	21	0.6	2.24
229151	Human	Human	female	596	Astrid	female	1	3	3	AS	Away	same	right	right	position	turn	1	arm	1	1	0	unknown	10	49	22	10	57	16	2.24	10.04
229151	Human	Human	female	596	Astrid	female	1	3	3	AS	Away	same	right	right	visual	point	1	arm	1	1	1	unknown	10	50	15	11	2	22	2.96	15.28
229151	Human	Human	female	596	Astrid	female	1	3	3	AS	Away	same	right	right	auditory	vocalization	1	arm	1	1	4	unknown	10	50	15	10	51	13	2.96	3.92	verbal ref (da)
229151	Human	Human	female	596	Astrid	female	1	3	3	AS	Away	same	right	right	auditory	vocalization	1	arm	1	1	4	unknown	10	52	11	10	53	4	4.8	5.56	verbal ref (da)
229151	Human	Human	female	596	Astrid	female	1	3	3	AS	Away	same	right	right	auditory	vocalization	1	arm	1	1	4	unknown	10	53	24	10	54	24	6.32	7.36	verbal ref (da)
229151	Human	Human	female	596	Astrid	female	1	3	3	AS	Away	same	right	right	auditory	vocalization	1	arm	1	1	4	unknown	10	55	22	10	56	21	8.24	9.24	verbal ref (da)
229151	Human	Human	female	596	Astrid	female	1	3	3	AS	Away	same	right	right	position	turn	1	arm	4	0	0	unknown	10	57	17	10	58	11	10.04	10.84
229151	Human	Human	female	596	Astrid	female	1	3	3	AS	Away	same	right	right	auditory	vocalization	1	arm	4	0	4	unknown	10	58	0	10	58	14	10.36	10.96	verbal ref (da)
229151	Human	Human	female	596	Astrid	female	1	3	3	AS	Away	same	right	right	position	turn	1	arm	1	1	0	unknown	10	58	12	10	59	12	10.84	11.88
229151	Human	Human	female	596	Astrid	female	1	3	3	AS	Away	same	right	right	position	turn	1	arm	4	0	0	unknown	10	59	13	11	2	12	11.88	14.88
229151	Human	Human	female	596	Astrid	female	1	3	3	AS	Away	same	right	right	auditory	vocalization	1	arm	4	0	4	unknown	10	59	18	11	0	8	12.08	12.72	verbal ref (da)
229151	Human	Human	female	596	Astrid	female	1	3	3	AS	Away	same	right	right	auditory	vocalization	1	arm	4	0	4	unknown	11	1	11	11	2	2	13.8	14.48	verbal ref (da)
229151	Human	Human	female	596	Astrid	female	1	3	3	AS	Away	same	right	right	position	turn	1	arm	1	1	0	unknown	11	2	13	11	7	15	14.88	20
229151	Human	Human	female	596	Astrid	female	1	3	3	AS	Away	same	right	right	auditory	vocalization	1	arm	1	1	4	unknown	11	5	24	11	6	19	18.32	19.16	verbal ref (mal)
229151	Human	Human	female	596	Astrid	female	1	3	3	AS	Away	same	right	right	visual	reach	1	arm	1	1	1	unknown	11	6	4	11	7	15	18.52	20
229151	Human	Human	female	596	Astrid	female	1	3	3	AS	Away	same	right	right	auditory	vocalization	1	arm	1	1	4	unknown	11	7	12	11	7	15	19.84	20	verbal ref (mal)
229151	Human	Human	female	596	Astrid	female	1	4	2	TD	Towards	different	right	left	position	start	1	arm	1	1	0	unknown	13	57	10	14	0	4	0	2.8
229151	Human	Human	female	596	Astrid	female	1	4	2	TD	Towards	different	right	left	visual	point	1	arm	1	1	4	unknown	13	57	14	14	0	4	0.16	2.8	point (away); point to door
229151	Human	Human	female	596	Astrid	female	1	4	2	TD	Towards	different	right	left	auditory	vocalization	1	arm	1	1	4	unknown	13	57	21	13	58	12	0.44	1.12	verbal ref (der)
229151	Human	Human	female	596	Astrid	female	1	4	2	TD	Towards	different	right	left	position	leave	1	far	4	0	0	unknown	14	0	5	14	3	24	2.8	6.6
229151	Human	Human	female	596	Astrid	female	1	4	2	TD	Towards	different	right	left	auditory	vocalization	1	far	4	0	4	unknown	14	3	1	14	3	20	5.64	6.44	verbal ref (da)
229151	Human	Human	female	596	Astrid	female	1	4	2	TD	Towards	different	right	left	position	turn	1	far	1	1	0	unknown	14	4	0	14	15	18	6.6	18.36
229151	Human	Human	female	596	Astrid	female	1	4	2	TD	Towards	different	right	left	visual	point	1	far	1	1	4	unknown	14	4	0	14	6	21	6.6	9.48	point (away); point to door
229151	Human	Human	female	596	Astrid	female	1	4	2	TD	Towards	different	right	left	auditory	vocalization	1	far	1	1	4	unknown	14	5	10	14	5	23	8	8.56	verbal ref (da)
229151	Human	Human	female	596	Astrid	female	1	4	2	TD	Towards	different	right	left	auditory	bang	1	far	1	1	4	right hand	14	6	22	14	7	8	9.48	9.96	door
229151	Human	Human	female	596	Astrid	female	1	4	2	TD	Towards	different	right	left	auditory	vocalization	1	far	1	1	4	unknown	14	7	6	14	7	21	9.84	10.48	verbal ref (da)
229151	Human	Human	female	596	Astrid	female	1	4	2	TD	Towards	different	right	left	auditory	vocalization	1	far	1	1	4	unknown	14	8	22	14	9	17	11.48	12.32	verbal ref (da)
229151	Human	Human	female	596	Astrid	female	1	4	2	TD	Towards	different	right	left	auditory	bang	1	far	1	1	4	right hand	14	13	1	14	13	10	15.64	16.04	door
229151	Human	Human	female	596	Astrid	female	1	4	2	TD	Towards	different	right	left	auditory	vocalization	1	far	1	1	4	unknown	14	13	1	14	13	22	15.64	16.52	verbal ref (da)
229151	Human	Human	female	596	Astrid	female	1	4	2	TD	Towards	different	right	left	visual	shrug	1	far	1	1	4	unknown	14	14	5	14	15	1	16.8	17.68
229151	Human	Human	female	596	Astrid	female	1	4	2	TD	Towards	different	right	left	auditory	vocalization	1	far	1	1	4	unknown	14	14	9	14	15	1	16.96	17.68
229151	Human	Human	female	596	Astrid	female	1	4	2	TD	Towards	different	right	left	position	turn	1	far	4	0	0	unknown	14	15	19	14	17	9	18.36	20
228341	Human	Human	male	593	Antje	female	1	1	3	AS	Away	same	left	left	position	start	1	close	1	1	0	unknown	4	19	13	4	23	21	0	4.36
228341	Human	Human	male	593	Antje	female	1	1	3	AS	Away	same	left	left	auditory	vocalization	1	close	1	1	4	unknown	4	22	15	4	23	1	3.08	3.56
228341	Human	Human	male	593	Antje	female	1	1	3	AS	Away	same	left	left	position	approach	1	arm	1	1	0	unknown	4	23	22	4	34	15	4.36	15.12
228341	Human	Human	male	593	Antje	female	1	1	3	AS	Away	same	left	left	auditory	vocalization	1	arm	1	1	4	unknown	4	23	22	4	24	23	4.36	5.44
228341	Human	Human	male	593	Antje	female	1	1	3	AS	Away	same	left	left	auditory	vocalization	1	arm	1	1	4	unknown	4	25	18	4	26	0	6.2	6.52
228341	Human	Human	male	593	Antje	female	1	1	3	AS	Away	same	left	left	position	turn	1	arm	4	0	0	unknown	4	34	16	4	37	23	15.12	18.44
228341	Human	Human	male	593	Antje	female	1	1	3	AS	Away	same	left	left	position	leave	1	far	4	0	0	unknown	4	37	24	4	39	12	18.44	20
228341	Human	Human	male	593	Antje	female	1	1	3	AS	Away	same	left	left	auditory	vocalization	1	far	4	0	4	unknown	4	37	24	4	38	17	18.44	19.2
228341	Human	Human	male	593	Antje	female	1	2	2	TD	Towards	different	right	left	position	start	1	arm	1	1	0	unknown	6	10	4	6	27	22	0	17.76
228341	Human	Human	male	593	Antje	female	1	2	2	TD	Towards	different	right	left	auditory	vocalization	1	arm	1	1	4	unknown	6	11	19	6	12	22	1.6	2.76
228341	Human	Human	male	593	Antje	female	1	2	2	TD	Towards	different	right	left	visual	point	1	arm	1	1	1	unknown	6	12	7	6	12	22	2.12	2.76
228341	Human	Human	male	593	Antje	female	1	2	2	TD	Towards	different	right	left	visual	reach	1	arm	1	1	1	unknown	6	13	14	6	16	0	3.4	5.88
228341	Human	Human	male	593	Antje	female	1	2	2	TD	Towards	different	right	left	auditory	vocalization	1	arm	1	1	4	unknown	6	13	14	6	14	0	3.4	3.88
228341	Human	Human	male	593	Antje	female	1	2	2	TD	Towards	different	right	left	auditory	vocalization	1	arm	1	1	4	unknown	6	14	11	6	14	17	4.28	4.56
228341	Human	Human	male	593	Antje	female	1	2	2	TD	Towards	different	right	left	auditory	bang	1	arm	1	1	1	foot	6	19	22	6	20	4	9.72	10.04
228341	Human	Human	male	593	Antje	female	1	2	2	TD	Towards	different	right	left	auditory	bang	1	arm	1	1	1	foot	6	21	4	6	21	10	11	11.28
228341	Human	Human	male	593	Antje	female	1	2	2	TD	Towards	different	right	left	auditory	bang	1	arm	1	1	1	foot	6	22	7	6	22	11	12.12	12.32
228341	Human	Human	male	593	Antje	female	1	2	2	TD	Towards	different	right	left	auditory	vocalization	1	arm	1	1	4	unknown	6	22	7	6	23	0	12.12	12.88
228341	Human	Human	male	593	Antje	female	1	2	2	TD	Towards	different	right	left	auditory	vocalization	1	arm	1	1	4	unknown	6	26	6	6	27	9	16.08	17.24
228341	Human	Human	male	593	Antje	female	1	2	2	TD	Towards	different	right	left	position	turn	1	arm	2	1	0	unknown	6	27	23	6	29	16	17.76	19.52
228341	Human	Human	male	593	Antje	female	1	2	2	TD	Towards	different	right	left	auditory	vocalization	1	arm	2	1	4	unknown	6	28	17	6	29	11	18.52	19.32
228341	Human	Human	male	593	Antje	female	1	2	2	TD	Towards	different	right	left	position	switch	2	far	2	1	0	unknown	6	29	17	6	30	3	19.52	20
228341	Human	Human	male	593	Antje	female	1	2	2	TD	Towards	different	right	left	auditory	vocalization	2	far	2	1	4	unknown	6	30	0	6	30	3	19.84	20
228341	Human	Human	male	593	Antje	female	1	3	4	AD	Away	different	left	right	position	start	1	close	1	1	0	unknown	7	50	7	7	58	0	0	7.76
228341	Human	Human	male	593	Antje	female	1	3	4	AD	Away	different	left	right	auditory	vocalization	1	close	1	1	4	unknown	7	53	13	7	53	19	3.24	3.52
228341	Human	Human	male	593	Antje	female	1	3	4	AD	Away	different	left	right	auditory	vocalization	1	close	1	1	4	unknown	7	54	13	7	54	21	4.24	4.6
228341	Human	Human	male	593	Antje	female	1	3	4	AD	Away	different	left	right	auditory	body slap	1	close	1	1	4	both hands	7	54	21	7	57	5	4.56	6.96	4x
228341	Human	Human	male	593	Antje	female	1	3	4	AD	Away	different	left	right	auditory	vocalization	1	close	1	1	4	unknown	7	57	10	7	57	17	7.12	7.44
228341	Human	Human	male	593	Antje	female	1	3	4	AD	Away	different	left	right	position	turn	1	close	4	0	0	unknown	7	58	1	7	59	21	7.76	9.6
228341	Human	Human	male	593	Antje	female	1	3	4	AD	Away	different	left	right	position	leave	1	far	4	0	0	unknown	7	59	22	8	10	6	9.6	20
228341	Human	Human	male	593	Antje	female	1	3	4	AD	Away	different	left	right	auditory	vocalization	1	far	4	0	4	unknown	8	1	9	8	2	6	11.08	12
228341	Human	Human	male	593	Antje	female	1	3	4	AD	Away	different	left	right	action	touch	1	far	4	0	0	unknown	8	1	20	8	5	7	11.52	15.04	pling-machine
228341	Human	Human	male	593	Antje	female	1	3	4	AD	Away	different	left	right	auditory	vocalization	1	far	4	0	4	unknown	8	3	0	8	3	12	12.72	13.24
228341	Human	Human	male	593	Antje	female	1	3	4	AD	Away	different	left	right	auditory	vocalization	1	far	4	0	4	unknown	8	5	1	8	5	7	14.76	15.04
228341	Human	Human	male	593	Antje	female	1	3	4	AD	Away	different	left	right	auditory	vocalization	1	far	4	0	4	unknown	8	6	17	8	7	5	16.4	16.96
228341	Human	Human	male	593	Antje	female	1	3	4	AD	Away	different	left	right	action	touch	1	far	4	0	0	unknown	8	7	21	8	10	6	17.56	20	pling-machine
228341	Human	Human	male	593	Antje	female	1	3	4	AD	Away	different	left	right	auditory	vocalization	1	far	4	0	4	unknown	8	8	16	8	9	12	18.36	19.24
228341	Human	Human	male	593	Antje	female	1	4	1	TS	Towards	same	right	right	position	start	1	far	1	1	0	unknown	9	38	24	9	40	2	0	1.16
228341	Human	Human	male	593	Antje	female	1	4	1	TS	Towards	same	right	right	position	turn	1	far	4	0	0	unknown	9	40	3	9	54	13	1.16	15.6
228341	Human	Human	male	593	Antje	female	1	4	1	TS	Towards	same	right	right	auditory	vocalization	1	far	4	0	4	unknown	9	42	0	9	42	10	3.04	3.48
228341	Human	Human	male	593	Antje	female	1	4	1	TS	Towards	same	right	right	action	touch	1	far	4	0	0	unknown	9	42	13	9	53	10	3.56	14.48	pling-machine
228341	Human	Human	male	593	Antje	female	1	4	1	TS	Towards	same	right	right	auditory	vocalization	1	far	4	0	4	unknown	9	42	13	9	43	13	3.56	4.6
228341	Human	Human	male	593	Antje	female	1	4	1	TS	Towards	same	right	right	auditory	vocalization	1	far	4	0	4	unknown	9	44	1	9	45	2	5.08	6.16
228341	Human	Human	male	593	Antje	female	1	4	1	TS	Towards	same	right	right	auditory	vocalization	1	far	4	0	4	unknown	9	45	24	9	46	9	7	7.44
228341	Human	Human	male	593	Antje	female	1	4	1	TS	Towards	same	right	right	auditory	vocalization	1	far	4	0	4	unknown	9	47	0	9	47	11	8.04	8.52
228341	Human	Human	male	593	Antje	female	1	4	1	TS	Towards	same	right	right	auditory	vocalization	1	far	4	0	4	unknown	9	48	15	9	49	18	9.64	10.8
228341	Human	Human	male	593	Antje	female	1	4	1	TS	Towards	same	right	right	auditory	vocalization	1	far	4	0	4	unknown	9	51	14	9	51	18	12.6	12.8
228341	Human	Human	male	593	Antje	female	1	4	1	TS	Towards	same	right	right	auditory	vocalization	1	far	4	0	4	unknown	9	52	4	9	53	5	13.2	14.28
228341	Human	Human	male	593	Antje	female	1	4	1	TS	Towards	same	right	right	auditory	vocalization	1	far	4	0	4	unknown	9	54	7	9	54	15	15.32	15.68
228341	Human	Human	male	593	Antje	female	1	4	1	TS	Towards	same	right	right	position	turn	1	far	1	1	0	unknown	9	54	14	9	55	16	15.6	16.72
228341	Human	Human	male	593	Antje	female	1	4	1	TS	Towards	same	right	right	position	turn	1	far	4	0	0	unknown	9	55	17	9	58	23	16.72	20
228341	Human	Human	male	593	Antje	female	1	4	1	TS	Towards	same	right	right	auditory	vocalization	1	far	4	0	4	unknown	9	56	12	9	57	19	17.52	18.84
228341	Human	Human	male	593	Antje	female	1	4	1	TS	Towards	same	right	right	auditory	vocalization	1	far	4	0	4	unknown	9	58	12	9	58	19	19.52	19.84
228341	Human	Human	male	593	Antje	female	2	5	1	TS	Towards	same	left	left	position	start	1	arm	1	1	0	unknown	11	20	12	11	32	17	0	12.24
228341	Human	Human	male	593	Antje	female	2	5	1	TS	Towards	same	left	left	visual	point	1	arm	1	1	1	unknown	11	26	23	11	32	13	6.44	12.08
228341	Human	Human	male	593	Antje	female	2	5	1	TS	Towards	same	left	left	auditory	vocalization	1	arm	1	1	4	unknown	11	27	7	11	27	20	6.8	7.36	verbal ref (hier)
228341	Human	Human	male	593	Antje	female	2	5	1	TS	Towards	same	left	left	auditory	vocalization	1	arm	1	1	4	unknown	11	28	18	11	29	1	8.24	8.6	verbal ref (hier)
228341	Human	Human	male	593	Antje	female	2	5	1	TS	Towards	same	left	left	auditory	vocalization	1	arm	1	1	4	unknown	11	29	14	11	29	20	9.08	9.36	verbal ref (hier)
228341	Human	Human	male	593	Antje	female	2	5	1	TS	Towards	same	left	left	auditory	vocalization	1	arm	1	1	4	unknown	11	31	5	11	31	19	10.72	11.32	verbal ref (da)
228341	Human	Human	male	593	Antje	female	2	5	1	TS	Towards	same	left	left	position	turn	1	arm	4	0	0	unknown	11	32	18	11	34	14	12.24	14.12
228341	Human	Human	male	593	Antje	female	2	5	1	TS	Towards	same	left	left	auditory	vocalization	1	arm	4	0	4	unknown	11	32	24	11	33	18	12.48	13.28	verbal (klötze???)
228341	Human	Human	male	593	Antje	female	2	5	1	TS	Towards	same	left	left	position	leave	1	far	4	0	0	unknown	11	34	15	11	36	23	14.12	16.48
228341	Human	Human	male	593	Antje	female	2	5	1	TS	Towards	same	left	left	auditory	vocalization	1	far	4	0	4	unknown	11	34	23	11	35	16	14.44	15.2
228341	Human	Human	male	593	Antje	female	2	5	1	TS	Towards	same	left	left	auditory	vocalization	1	far	4	0	4	unknown	11	36	3	11	36	24	15.64	16.52
228341	Human	Human	male	593	Antje	female	2	5	1	TS	Towards	same	left	left	position	turn	1	far	1	1	0	unknown	11	36	24	11	40	11	16.48	20
228341	Human	Human	male	593	Antje	female	2	5	1	TS	Towards	same	left	left	auditory	vocalization	1	far	1	1	4	unknown	11	37	23	11	38	12	17.44	18.04
228341	Human	Human	male	593	Antje	female	2	6	4	AD	Away	different	right	left	position	start	1	close	2	1	0	unknown	13	4	6	13	6	0	0	1.8
228341	Human	Human	male	593	Antje	female	2	6	4	AD	Away	different	right	left	visual	point	1	close	2	1	2	unknown	13	4	16	13	8	3	0.4	3.92
228341	Human	Human	male	593	Antje	female	2	6	4	AD	Away	different	right	left	auditory	vocalization	1	close	2	1	4	unknown	13	5	4	13	6	6	0.92	2.04
228341	Human	Human	male	593	Antje	female	2	6	4	AD	Away	different	right	left	position	switch	2	close	2	1	0	unknown	13	6	1	13	6	21	1.8	2.64
228341	Human	Human	male	593	Antje	female	2	6	4	AD	Away	different	right	left	position	approach	2	arm	2	1	0	unknown	13	6	22	13	9	6	2.64	5.04
228341	Human	Human	male	593	Antje	female	2	6	4	AD	Away	different	right	left	auditory	vocalization	2	arm	2	1	4	unknown	13	6	22	13	7	8	2.64	3.12	verbal ref (hier)
228341	Human	Human	male	593	Antje	female	2	6	4	AD	Away	different	right	left	auditory	vocalization	2	arm	2	1	4	unknown	13	8	19	13	9	4	4.52	4.96
228341	Human	Human	male	593	Antje	female	2	6	4	AD	Away	different	right	left	position	turn	2	arm	1	1	0	unknown	13	9	7	13	10	15	5.04	6.4
228341	Human	Human	male	593	Antje	female	2	6	4	AD	Away	different	right	left	auditory	vocalization	2	arm	1	1	4	unknown	13	10	4	13	11	2	5.92	6.88
228341	Human	Human	male	593	Antje	female	2	6	4	AD	Away	different	right	left	position	switch	1	close	1	1	0	unknown	13	10	16	13	11	18	6.4	7.52
228341	Human	Human	male	593	Antje	female	2	6	4	AD	Away	different	right	left	position	approach	1	arm	1	1	0	unknown	13	11	19	13	21	16	7.52	17.44
228341	Human	Human	male	593	Antje	female	2	6	4	AD	Away	different	right	left	visual	point	1	arm	1	1	2	unknown	13	11	23	13	15	2	7.68	10.88
228341	Human	Human	male	593	Antje	female	2	6	4	AD	Away	different	right	left	auditory	vocalization	1	arm	1	1	4	unknown	13	12	2	13	12	12	7.84	8.28	verbal ref (hier)
228341	Human	Human	male	593	Antje	female	2	6	4	AD	Away	different	right	left	auditory	vocalization	1	arm	1	1	4	unknown	13	17	2	13	18	4	12.84	13.96
228341	Human	Human	male	593	Antje	female	2	6	4	AD	Away	different	right	left	auditory	vocalization	1	arm	1	1	4	unknown	13	18	13	13	18	20	14.28	14.6
228341	Human	Human	male	593	Antje	female	2	6	4	AD	Away	different	right	left	auditory	vocalization	1	arm	1	1	4	unknown	13	19	17	13	20	18	15.44	16.52	verbal (weiter?)
228341	Human	Human	male	593	Antje	female	2	6	4	AD	Away	different	right	left	auditory	vocalization	1	arm	1	1	4	unknown	13	21	9	13	22	4	17.12	17.96	verbal (weiter?)
228341	Human	Human	male	593	Antje	female	2	6	4	AD	Away	different	right	left	position	turn	1	close	4	0	0	unknown	13	21	17	13	23	14	17.44	19.36
228341	Human	Human	male	593	Antje	female	2	6	4	AD	Away	different	right	left	auditory	vocalization	1	close	4	0	4	unknown	13	22	20	13	23	7	18.56	19.08
228341	Human	Human	male	593	Antje	female	2	6	4	AD	Away	different	right	left	position	leave	1	far	4	0	0	unknown	13	23	15	13	24	5	19.36	20
228341	Human	Human	male	593	Antje	female	2	6	4	AD	Away	different	right	left	auditory	vocalization	1	far	4	0	4	unknown	13	23	17	13	24	5	19.44	20
228341	Human	Human	male	593	Antje	female	2	7	2	TD	Towards	different	left	right	position	start	2	far	1	1	0	unknown	14	56	21	14	58	20	0	2
228341	Human	Human	male	593	Antje	female	2	7	2	TD	Towards	different	left	right	action	touch	2	far	1	1	0	unknown	14	56	21	14	59	8	0	2.52	pling-machine
228341	Human	Human	male	593	Antje	female	2	7	2	TD	Towards	different	left	right	position	turn	2	far	2	1	0	unknown	14	58	21	15	1	16	2	4.84
228341	Human	Human	male	593	Antje	female	2	7	2	TD	Towards	different	left	right	visual	point	2	far	2	1	2	unknown	14	59	9	15	3	5	2.52	6.4
228341	Human	Human	male	593	Antje	female	2	7	2	TD	Towards	different	left	right	auditory	vocalization	2	far	2	1	4	unknown	14	59	18	15	0	15	2.88	3.8
228341	Human	Human	male	593	Antje	female	2	7	2	TD	Towards	different	left	right	auditory	vocalization	2	far	2	1	4	unknown	15	1	5	15	1	17	4.36	4.88
228341	Human	Human	male	593	Antje	female	2	7	2	TD	Towards	different	left	right	position	approach	2	arm	2	1	0	unknown	15	1	17	15	3	5	4.84	6.4
228341	Human	Human	male	593	Antje	female	2	7	2	TD	Towards	different	left	right	auditory	vocalization	2	arm	2	1	4	unknown	15	2	16	15	3	2	5.8	6.28	verbal ref (hier)
228341	Human	Human	male	593	Antje	female	2	7	2	TD	Towards	different	left	right	auditory	vocalization	2	arm	2	1	4	unknown	15	3	4	15	3	19	6.32	6.96	verbal ref (hier)
228341	Human	Human	male	593	Antje	female	2	7	2	TD	Towards	different	left	right	position	turn	2	arm	1	1	0	unknown	15	3	6	15	4	6	6.4	7.44
228341	Human	Human	male	593	Antje	female	2	7	2	TD	Towards	different	left	right	visual	point	2	arm	1	1	2	unknown	15	4	6	15	8	12	7.4	11.68
228341	Human	Human	male	593	Antje	female	2	7	2	TD	Towards	different	left	right	position	turn	2	arm	4	0	0	unknown	15	4	7	15	5	2	7.44	8.28
228341	Human	Human	male	593	Antje	female	2	7	2	TD	Towards	different	left	right	auditory	vocalization	2	arm	4	0	4	unknown	15	4	15	15	6	5	7.76	9.4
228341	Human	Human	male	593	Antje	female	2	7	2	TD	Towards	different	left	right	position	switch	1	close	4	0	0	unknown	15	5	3	15	5	24	8.28	9.16
228341	Human	Human	male	593	Antje	female	2	7	2	TD	Towards	different	left	right	position	turn	1	close	1	1	0	unknown	15	6	0	15	10	1	9.16	13.24
228341	Human	Human	male	593	Antje	female	2	7	2	TD	Towards	different	left	right	auditory	vocalization	1	close	1	1	4	unknown	15	6	20	15	7	11	9.96	10.64
228341	Human	Human	male	593	Antje	female	2	7	2	TD	Towards	different	left	right	auditory	vocalization	1	close	1	1	4	unknown	15	8	4	15	8	10	11.32	11.6
228341	Human	Human	male	593	Antje	female	2	7	2	TD	Towards	different	left	right	auditory	vocalization	1	close	1	1	4	unknown	15	9	1	15	9	17	12.2	12.88
228341	Human	Human	male	593	Antje	female	2	7	2	TD	Towards	different	left	right	position	approach	1	arm	1	1	0	unknown	15	10	2	15	16	8	13.24	19.52
228341	Human	Human	male	593	Antje	female	2	7	2	TD	Towards	different	left	right	auditory	body slap	1	arm	1	1	4	both hands	15	10	2	15	12	13	13.24	15.72	4x
228341	Human	Human	male	593	Antje	female	2	7	2	TD	Towards	different	left	right	position	turn	1	arm	2	1	0	unknown	15	16	9	15	16	20	19.52	20
228341	Human	Human	male	593	Antje	female	2	8	3	AS	Away	same	right	right	position	start	1	far	1	1	0	unknown	16	55	19	16	57	7	0	1.56
228341	Human	Human	male	593	Antje	female	2	8	3	AS	Away	same	right	right	action	touch	1	far	1	1	0	unknown	16	55	19	16	59	8	0	3.6	pling-machine
228341	Human	Human	male	593	Antje	female	2	8	3	AS	Away	same	right	right	position	turn	1	far	4	0	0	unknown	16	57	8	17	5	4	1.56	9.44
228341	Human	Human	male	593	Antje	female	2	8	3	AS	Away	same	right	right	auditory	body slap	1	far	4	0	4	both hands	16	59	9	16	59	24	3.6	4.24
228341	Human	Human	male	593	Antje	female	2	8	3	AS	Away	same	right	right	auditory	vocalization	1	far	4	0	4	unknown	16	59	17	17	0	3	3.92	4.4
228341	Human	Human	male	593	Antje	female	2	8	3	AS	Away	same	right	right	position	turn	1	far	1	1	0	unknown	17	5	5	17	8	14	9.44	12.84
228341	Human	Human	male	593	Antje	female	2	8	3	AS	Away	same	right	right	position	approach	1	arm	1	1	0	unknown	17	8	15	17	11	14	12.84	15.84
228341	Human	Human	male	593	Antje	female	2	8	3	AS	Away	same	right	right	auditory	bang	1	arm	1	1	1	foot/right	17	9	16	17	10	7	13.88	14.56
228341	Human	Human	male	593	Antje	female	2	8	3	AS	Away	same	right	right	position	turn	1	arm	4	0	0	unknown	17	11	15	17	15	18	15.84	20
233831	Human	Human	female	612	Astrid	female	1	1	3	AS	Away	same	left	left	position	start	1	arm	1	1	0	unknown	5	1	21	5	6	24	0	5.16
233831	Human	Human	female	612	Astrid	female	1	1	3	AS	Away	same	left	left	visual	point	1	arm	1	1	1	unknown	5	1	21	5	3	0	0	1.2
233831	Human	Human	female	612	Astrid	female	1	1	3	AS	Away	same	left	left	auditory	vocalization	1	arm	1	1	4	unknown	5	3	0	5	3	16	1.16	1.84	verbal ref (da)
233831	Human	Human	female	612	Astrid	female	1	1	3	AS	Away	same	left	left	visual	point	1	arm	1	1	1	unknown	5	3	16	5	4	3	1.8	2.32
233831	Human	Human	female	612	Astrid	female	1	1	3	AS	Away	same	left	left	auditory	vocalization	1	arm	1	1	4	unknown	5	5	3	5	5	13	3.28	3.72	verbal ref (da)
233831	Human	Human	female	612	Astrid	female	1	1	3	AS	Away	same	left	left	visual	point	1	arm	1	1	1	unknown	5	5	18	5	6	13	3.88	4.72
233831	Human	Human	female	612	Astrid	female	1	1	3	AS	Away	same	left	left	position	turn	1	arm	4	0	0	unknown	5	7	0	5	8	19	5.16	6.96
233831	Human	Human	female	612	Astrid	female	1	1	3	AS	Away	same	left	left	position	leave	1	far	4	0	0	unknown	5	8	20	5	21	20	6.96	20	leave to parent
233831	Human	Human	female	612	Astrid	female	1	1	3	AS	Away	same	left	left	auditory	vocalization	1	far	4	0	4	unknown	5	10	21	5	11	4	9	9.36	verbal ref (da)
233831	Human	Human	female	612	Astrid	female	1	1	3	AS	Away	same	left	left	auditory	vocalization	1	far	4	0	4	unknown	5	11	18	5	12	2	9.88	10.28	verbal (buch?)
233831	Human	Human	female	612	Astrid	female	1	1	3	AS	Away	same	left	left	action	touch	1	far	4	0	0	unknown	5	17	24	5	21	13	16.12	19.72	pling-machine
233831	Human	Human	female	612	Astrid	female	1	1	3	AS	Away	same	left	left	auditory	vocalization	1	far	4	0	4	unknown	5	17	24	5	19	3	16.12	17.32
233831	Human	Human	female	612	Astrid	female	1	2	4	AD	Away	different	left	right	position	start	2	arm	2	1	0	unknown	6	58	2	7	0	21	0	2.8
233831	Human	Human	female	612	Astrid	female	1	2	4	AD	Away	different	left	right	auditory	vocalization	2	arm	2	1	4	unknown	6	58	2	6	59	3	0	1.08	verbal ref (da)
233831	Human	Human	female	612	Astrid	female	1	2	4	AD	Away	different	left	right	visual	point	2	arm	2	1	2	unknown	6	59	3	7	2	0	1.04	3.96
233831	Human	Human	female	612	Astrid	female	1	2	4	AD	Away	different	left	right	auditory	vocalization	2	arm	2	1	4	unknown	7	0	11	7	1	0	2.36	2.96	verbal ref (da)
233831	Human	Human	female	612	Astrid	female	1	2	4	AD	Away	different	left	right	position	turn	2	arm	4	0	0	unknown	7	0	22	7	7	7	2.8	9.24
233831	Human	Human	female	612	Astrid	female	1	2	4	AD	Away	different	left	right	position	leave	2	far	4	0	0	unknown	7	7	8	7	14	6	9.24	16.2
233831	Human	Human	female	612	Astrid	female	1	2	4	AD	Away	different	left	right	auditory	vocalization	2	far	4	0	4	unknown	7	8	5	7	8	18	10.12	10.68	verbal ref (da)
233831	Human	Human	female	612	Astrid	female	1	2	4	AD	Away	different	left	right	action	touch	2	far	4	0	0	unknown	7	8	19	7	16	2	10.68	18.04	pling-machine
233831	Human	Human	female	612	Astrid	female	1	2	4	AD	Away	different	left	right	action	touch	2	far	4	0	4	unknown	7	8	19	7	9	3	10.68	11.08	pling-machine (2x)
233831	Human	Human	female	612	Astrid	female	1	2	4	AD	Away	different	left	right	auditory	vocalization	2	far	4	0	4	unknown	7	11	20	7	13	6	13.72	15.2
233831	Human	Human	female	612	Astrid	female	1	2	4	AD	Away	different	left	right	position	turn	2	far	1	1	0	unknown	7	14	7	7	17	19	16.2	19.72
233831	Human	Human	female	612	Astrid	female	1	2	4	AD	Away	different	left	right	auditory	vocalization	2	far	1	1	4	unknown	7	14	18	7	15	6	16.64	17.2
233831	Human	Human	female	612	Astrid	female	1	2	4	AD	Away	different	left	right	auditory	vocalization	2	far	1	1	4	unknown	7	15	21	7	16	11	17.76	18.4	verbal ref (da)
233831	Human	Human	female	612	Astrid	female	1	2	4	AD	Away	different	left	right	visual	point	2	far	1	1	2	unknown	7	16	3	7	18	1	18.04	20
233831	Human	Human	female	612	Astrid	female	1	2	4	AD	Away	different	left	right	auditory	vocalization	2	far	1	1	4	unknown	7	16	24	7	17	16	18.88	19.6	verbal ref (da)
233831	Human	Human	female	612	Astrid	female	1	2	4	AD	Away	different	left	right	position	approach	2	close	2	1	0	unknown	7	17	20	7	18	1	19.72	20
233831	Human	Human	female	612	Astrid	female	1	3	1	TS	Towards	same	right	right	position	start	1	far	1	1	0	unknown	8	55	6	8	56	14	0	1.36
233831	Human	Human	female	612	Astrid	female	1	3	1	TS	Towards	same	right	right	visual	point	1	far	1	1	1	unknown	8	55	6	8	55	19	0	0.56
233831	Human	Human	female	612	Astrid	female	1	3	1	TS	Towards	same	right	right	auditory	vocalization	1	far	1	1	4	unknown	8	55	6	8	55	24	0	0.76	verbal ref (da)
233831	Human	Human	female	612	Astrid	female	1	3	1	TS	Towards	same	right	right	position	approach	1	arm	1	1	0	unknown	8	56	15	9	1	10	1.36	6.2
233831	Human	Human	female	612	Astrid	female	1	3	1	TS	Towards	same	right	right	auditory	vocalization	1	arm	1	1	4	unknown	8	57	11	8	58	6	2.2	3.04	verbal ref (da)
233831	Human	Human	female	612	Astrid	female	1	3	1	TS	Towards	same	right	right	visual	point	1	arm	1	1	1	unknown	8	58	9	9	1	18	3.12	6.52
233831	Human	Human	female	612	Astrid	female	1	3	1	TS	Towards	same	right	right	auditory	vocalization	1	arm	1	1	4	unknown	8	58	21	8	59	4	3.6	3.96	verbal ref (da)
233831	Human	Human	female	612	Astrid	female	1	3	1	TS	Towards	same	right	right	auditory	vocalization	1	arm	1	1	4	unknown	9	0	3	9	0	13	4.88	5.32	verbal ref (da)
233831	Human	Human	female	612	Astrid	female	1	3	1	TS	Towards	same	right	right	auditory	vocalization	1	arm	1	1	4	unknown	9	1	6	9	2	9	6	7.16
233831	Human	Human	female	612	Astrid	female	1	3	1	TS	Towards	same	right	right	position	turn	1	arm	4	0	0	unknown	9	1	11	9	3	3	6.2	7.92
233831	Human	Human	female	612	Astrid	female	1	3	1	TS	Towards	same	right	right	position	leave	1	far	4	0	0	unknown	9	3	4	9	3	17	7.92	8.48
233831	Human	Human	female	612	Astrid	female	1	3	1	TS	Towards	same	right	right	position	switch	2	far	4	0	0	unknown	9	3	18	9	5	18	8.48	10.52
233831	Human	Human	female	612	Astrid	female	1	3	1	TS	Towards	same	right	right	auditory	vocalization	2	far	4	0	4	unknown	9	4	12	9	5	1	9.24	9.84
233831	Human	Human	female	612	Astrid	female	1	3	1	TS	Towards	same	right	right	position	turn	2	far	1	1	0	unknown	9	5	19	9	15	5	10.52	20
233831	Human	Human	female	612	Astrid	female	1	3	1	TS	Towards	same	right	right	auditory	vocalization	2	far	1	1	4	unknown	9	7	6	9	7	12	12	12.28	verbal ref (da)
233831	Human	Human	female	612	Astrid	female	1	3	1	TS	Towards	same	right	right	visual	point	2	far	1	1	1	unknown	9	7	12	9	7	15	12.24	12.4
233831	Human	Human	female	612	Astrid	female	1	4	2	TD	Towards	different	right	left	position	start	2	arm	2	1	0	unknown	10	39	12	10	41	8	0	1.88
233831	Human	Human	female	612	Astrid	female	1	4	2	TD	Towards	different	right	left	visual	point	2	arm	2	1	2	unknown	10	39	12	10	41	8	0	1.88
233831	Human	Human	female	612	Astrid	female	1	4	2	TD	Towards	different	right	left	auditory	vocalization	2	arm	2	1	4	unknown	10	39	12	10	39	24	0	0.52	verbal ref (da)
233831	Human	Human	female	612	Astrid	female	1	4	2	TD	Towards	different	right	left	position	turn	2	arm	4	0	0	unknown	10	41	9	10	43	2	1.88	3.64
233831	Human	Human	female	612	Astrid	female	1	4	2	TD	Towards	different	right	left	auditory	vocalization	2	arm	4	0	4	unknown	10	41	21	10	42	14	2.36	3.12	verbal (mami)
233831	Human	Human	female	612	Astrid	female	1	4	2	TD	Towards	different	right	left	position	leave	2	far	4	0	0	unknown	10	43	3	10	59	11	3.64	20
233831	Human	Human	female	612	Astrid	female	1	4	2	TD	Towards	different	right	left	auditory	vocalization	2	far	4	0	4	unknown	10	44	15	10	45	1	5.12	5.6	verbal (da)
233831	Human	Human	female	612	Astrid	female	1	4	2	TD	Towards	different	right	left	auditory	vocalization	2	far	4	0	4	unknown	10	45	13	10	46	8	6.04	6.88	verbal (mami)
233831	Human	Human	female	612	Astrid	female	1	4	2	TD	Towards	different	right	left	auditory	vocalization	2	far	4	0	4	unknown	10	47	4	10	48	1	7.68	8.6	verbal (mami)
233831	Human	Human	female	612	Astrid	female	1	4	2	TD	Towards	different	right	left	auditory	vocalization	2	far	4	0	4	unknown	10	49	6	10	50	0	9.76	10.56	verbal (mami)
233831	Human	Human	female	612	Astrid	female	2	5	2	TD	Towards	different	left	right	position	start	1	arm	2	1	0	unknown	12	44	19	12	45	13	0	0.8
233831	Human	Human	female	612	Astrid	female	2	5	2	TD	Towards	different	left	right	visual	point	1	arm	2	1	2	unknown	12	44	19	12	45	16	0	0.92
233831	Human	Human	female	612	Astrid	female	2	5	2	TD	Towards	different	left	right	auditory	vocalization	1	arm	2	1	4	unknown	12	44	19	12	45	12	0	0.76	verbal ref (da)
233831	Human	Human	female	612	Astrid	female	2	5	2	TD	Towards	different	left	right	position	turn	1	close	4	0	0	unknown	12	45	14	12	46	18	0.8	2
233831	Human	Human	female	612	Astrid	female	2	5	2	TD	Towards	different	left	right	auditory	vocalization	1	close	4	0	4	unknown	12	46	15	12	47	13	1.84	2.8
233831	Human	Human	female	612	Astrid	female	2	5	2	TD	Towards	different	left	right	position	leave	1	far	4	0	0	unknown	12	46	19	13	4	18	2	20
233831	Human	Human	female	612	Astrid	female	2	5	2	TD	Towards	different	left	right	action	touch	1	far	4	0	0	unknown	12	49	10	12	59	2	4.64	14.36	pling-machine
233831	Human	Human	female	612	Astrid	female	2	5	2	TD	Towards	different	left	right	auditory	vocalization	1	far	4	0	4	unknown	12	50	8	12	50	23	5.56	6.2	verbal ref (da)
233831	Human	Human	female	612	Astrid	female	2	5	2	TD	Towards	different	left	right	auditory	vocalization	1	far	4	0	4	unknown	12	55	0	12	55	14	10.24	10.84
233831	Human	Human	female	612	Astrid	female	2	5	2	TD	Towards	different	left	right	auditory	vocalization	1	far	4	0	4	unknown	12	57	9	12	57	23	12.6	13.2	verbal (hallo?)
233831	Human	Human	female	612	Astrid	female	2	5	2	TD	Towards	different	left	right	visual	point	1	far	4	0	4	unknown	13	0	18	13	1	7	15.96	16.56
233831	Human	Human	female	612	Astrid	female	2	5	2	TD	Towards	different	left	right	auditory	vocalization	1	far	4	0	4	unknown	13	0	18	13	1	16	15.96	16.92
233831	Human	Human	female	612	Astrid	female	2	5	2	TD	Towards	different	left	right	auditory	vocalization	1	far	4	0	4	unknown	13	2	2	13	2	15	17.32	17.88
233831	Human	Human	female	612	Astrid	female	2	5	2	TD	Towards	different	left	right	auditory	vocalization	1	far	4	0	4	unknown	13	4	9	13	4	18	19.6	20	verbal (du?)
233831	Human	Human	female	612	Astrid	female	2	6	1	TS	Towards	same	left	left	position	start	1	arm	1	1	0	unknown	14	59	19	15	2	22	0	3.16
233831	Human	Human	female	612	Astrid	female	2	6	1	TS	Towards	same	left	left	visual	point	1	arm	1	1	1	unknown	14	59	19	15	1	14	0	1.84
233831	Human	Human	female	612	Astrid	female	2	6	1	TS	Towards	same	left	left	auditory	vocalization	1	arm	1	1	4	unknown	15	1	1	15	1	13	1.28	1.8	verbal ref (da)
233831	Human	Human	female	612	Astrid	female	2	6	1	TS	Towards	same	left	left	position	turn	1	close	4	0	0	unknown	15	2	23	15	4	1	3.16	4.32
233831	Human	Human	female	612	Astrid	female	2	6	1	TS	Towards	same	left	left	position	leave	1	far	4	0	0	unknown	15	4	2	15	19	18	4.32	20
233831	Human	Human	female	612	Astrid	female	2	6	1	TS	Towards	same	left	left	auditory	vocalization	1	far	4	0	4	unknown	15	7	0	15	7	21	7.24	8.12
233831	Human	Human	female	612	Astrid	female	2	6	1	TS	Towards	same	left	left	auditory	vocalization	1	far	4	0	4	unknown	15	10	23	15	11	13	11.16	11.8
233831	Human	Human	female	612	Astrid	female	2	6	1	TS	Towards	same	left	left	auditory	vocalization	1	far	4	0	4	unknown	15	14	1	15	14	20	14.28	15.08
233831	Human	Human	female	612	Astrid	female	2	6	1	TS	Towards	same	left	left	auditory	vocalization	1	far	4	0	4	unknown	15	15	16	15	16	1	15.88	16.32
233831	Human	Human	female	612	Astrid	female	2	6	1	TS	Towards	same	left	left	auditory	vocalization	1	far	4	0	4	unknown	15	19	14	15	19	18	19.8	20
233831	Human	Human	female	612	Astrid	female	2	7	4	AD	Away	different	right	left	position	start	2	far	4	0	0	unknown	17	41	5	17	43	15	0	2.44
233831	Human	Human	female	612	Astrid	female	2	7	4	AD	Away	different	right	left	position	turn	2	far	2	1	0	unknown	17	43	16	17	46	17	2.44	5.52
233831	Human	Human	female	612	Astrid	female	2	7	4	AD	Away	different	right	left	visual	point	2	far	2	1	2	unknown	17	45	9	17	45	15	4.16	4.44
233831	Human	Human	female	612	Astrid	female	2	7	4	AD	Away	different	right	left	auditory	vocalization	2	far	2	1	4	unknown	17	45	11	17	46	21	4.24	5.68	verbal ref (da)
233831	Human	Human	female	612	Astrid	female	2	7	4	AD	Away	different	right	left	position	approach	2	arm	2	1	0	unknown	17	46	18	17	48	13	5.52	7.36
233831	Human	Human	female	612	Astrid	female	2	7	4	AD	Away	different	right	left	auditory	vocalization	2	arm	2	1	4	unknown	17	47	13	17	48	2	6.32	6.92	verbal ref (da)
233831	Human	Human	female	612	Astrid	female	2	7	4	AD	Away	different	right	left	visual	point	2	arm	2	1	2	unknown	17	48	8	17	50	12	7.12	9.32
233831	Human	Human	female	612	Astrid	female	2	7	4	AD	Away	different	right	left	position	turn	2	arm	4	0	0	unknown	17	48	14	17	51	23	7.36	10.76
233831	Human	Human	female	612	Astrid	female	2	7	4	AD	Away	different	right	left	auditory	vocalization	2	arm	4	0	4	unknown	17	48	14	17	49	9	7.36	8.2	verbal ref (da)
233831	Human	Human	female	612	Astrid	female	2	7	4	AD	Away	different	right	left	auditory	vocalization	2	arm	4	0	4	unknown	17	50	1	17	50	14	8.84	9.4	verbal ref (da)
233831	Human	Human	female	612	Astrid	female	2	7	4	AD	Away	different	right	left	position	leave	2	far	4	0	0	unknown	17	51	24	17	55	7	10.76	14.12
233831	Human	Human	female	612	Astrid	female	2	7	4	AD	Away	different	right	left	position	turn	2	far	1	1	0	unknown	17	55	8	18	1	4	14.12	20
233831	Human	Human	female	612	Astrid	female	2	8	3	AS	Away	same	right	right	position	start	3	far	4	0	0	unknown	21	37	7	21	42	13	0	5.48
233831	Human	Human	female	612	Astrid	female	2	8	3	AS	Away	same	right	right	action	touch	3	far	4	0	0	unknown	21	37	7	21	44	21	0	7.6	pling-machine
233831	Human	Human	female	612	Astrid	female	2	8	3	AS	Away	same	right	right	auditory	vocalization	3	far	4	0	4	unknown	21	37	7	21	38	3	0	0.88
233831	Human	Human	female	612	Astrid	female	2	8	3	AS	Away	same	right	right	auditory	vocalization	3	far	4	0	4	unknown	21	39	3	21	39	18	1.84	2.48
233831	Human	Human	female	612	Astrid	female	2	8	3	AS	Away	same	right	right	auditory	vocalization	2	far	4	0	4	unknown	21	42	14	21	43	8	5.28	6.08	verbal (mami)
233831	Human	Human	female	612	Astrid	female	2	8	3	AS	Away	same	right	right	position	switch	2	far	4	0	0	unknown	21	42	14	21	57	6	5.28	20
233831	Human	Human	female	612	Astrid	female	2	8	3	AS	Away	same	right	right	action	touch	2	far	4	0	0	unknown	21	46	12	21	55	15	9.2	18.36	pling-machine
233831	Human	Human	female	612	Astrid	female	2	8	3	AS	Away	same	right	right	auditory	vocalization	2	far	4	0	4	unknown	21	47	21	21	48	13	10.56	11.28
233831	Human	Human	female	612	Astrid	female	2	8	3	AS	Away	same	right	right	auditory	vocalization	2	far	4	0	4	unknown	21	55	18	21	56	0	18.44	18.76
233831	Human	Human	female	612	Astrid	female	2	8	3	AS	Away	same	right	right	visual	point	2	far	4	0	4	unknown	21	55	22	21	56	1	18.6	18.8	point (away); point to door
233831	Human	Human	female	612	Astrid	female	2	8	3	AS	Away	same	right	right	auditory	vocalization	2	far	4	0	4	unknown	21	56	21	21	57	2	19.56	19.84
228571	Human	Human	female	608	Antje	female	1	1	2	TD	Towards	different	left	right	position	start	1	far	4	0	0	unknown	4	50	7	5	10	6	0	20
228571	Human	Human	female	608	Antje	female	1	1	2	TD	Towards	different	left	right	action	touch	1	far	4	0	0	right hand	4	50	7	5	9	12	0	19.24	pling-machine
228571	Human	Human	female	608	Antje	female	1	1	2	TD	Towards	different	left	right	action	touch	1	far	4	0	0	hand/left	4	50	7	5	10	6	0	20	pling-machine
228571	Human	Human	female	608	Antje	female	1	1	2	TD	Towards	different	left	right	auditory	vocalization	1	far	4	0	4	unknown	5	7	6	5	7	16	16.96	17.4
228571	Human	Human	female	608	Antje	female	1	2	1	TS	Towards	same	left	left	position	start	1	far	1	1	0	unknown	7	35	21	7	37	12	0	1.68
228571	Human	Human	female	608	Antje	female	1	2	1	TS	Towards	same	left	left	action	touch	1	far	1	1	0	unknown	7	35	21	7	36	17	0	0.88	pling-machine
228571	Human	Human	female	608	Antje	female	1	2	1	TS	Towards	same	left	left	position	approach	1	close	1	1	0	unknown	7	37	13	7	38	3	1.68	2.32
228571	Human	Human	female	608	Antje	female	1	2	1	TS	Towards	same	left	left	visual	point	1	close	1	1	1	unknown	7	37	24	7	39	19	2.12	3.96
228571	Human	Human	female	608	Antje	female	1	2	1	TS	Towards	same	left	left	position	approach	1	arm	1	1	0	unknown	7	38	4	7	53	23	2.32	18.12
228571	Human	Human	female	608	Antje	female	1	2	1	TS	Towards	same	left	left	position	turn	1	arm	4	0	0	unknown	7	53	24	7	55	20	18.12	20
228571	Human	Human	female	608	Antje	female	1	3	4	AD	Away	different	right	left	position	start	1	arm	1	1	0	unknown	10	21	3	10	29	10	0	8.32
228571	Human	Human	female	608	Antje	female	1	3	4	AD	Away	different	right	left	auditory	vocalization	1	arm	1	1	4	unknown	10	26	1	10	26	17	4.92	5.6
228571	Human	Human	female	608	Antje	female	1	3	4	AD	Away	different	right	left	position	turn	1	arm	4	0	0	unknown	10	29	11	10	31	13	8.32	10.44
228571	Human	Human	female	608	Antje	female	1	3	4	AD	Away	different	right	left	position	turn	1	arm	1	1	0	unknown	10	31	14	10	41	2	10.44	20
228571	Human	Human	female	608	Antje	female	1	3	4	AD	Away	different	right	left	visual	point	1	arm	1	1	1	unknown	10	32	22	10	34	8	11.76	13.24
228571	Human	Human	female	608	Antje	female	1	3	4	AD	Away	different	right	left	auditory	vocalization	1	arm	1	1	4	unknown	10	33	8	10	33	20	12.2	12.72	verbal ref (da)
228571	Human	Human	female	608	Antje	female	1	3	4	AD	Away	different	right	left	auditory	vocalization	1	arm	1	1	4	unknown	10	38	14	10	38	21	17.44	17.76
228571	Human	Human	female	608	Antje	female	1	4	3	AS	Away	same	right	right	position	start	2	far	1	1	0	unknown	13	12	0	13	13	13	0	1.56
228571	Human	Human	female	608	Antje	female	1	4	3	AS	Away	same	right	right	position	switch	1	close	1	1	0	unknown	13	13	14	13	14	8	1.56	2.36
228571	Human	Human	female	608	Antje	female	1	4	3	AS	Away	same	right	right	position	approach	1	arm	1	1	0	unknown	13	14	9	13	21	0	2.36	9.04
228571	Human	Human	female	608	Antje	female	1	4	3	AS	Away	same	right	right	position	turn	1	arm	4	0	0	unknown	13	21	1	13	25	4	9.04	13.2
228571	Human	Human	female	608	Antje	female	1	4	3	AS	Away	same	right	right	position	leave	1	far	4	0	0	unknown	13	25	5	13	29	8	13.2	17.36
228571	Human	Human	female	608	Antje	female	1	4	3	AS	Away	same	right	right	action	touch	1	far	4	0	0	unknown	13	26	12	13	29	16	14.48	17.68	pling-machine
228571	Human	Human	female	608	Antje	female	1	4	3	AS	Away	same	right	right	auditory	vocalization	1	far	4	0	4	unknown	13	29	5	13	30	0	17.2	18.04
228571	Human	Human	female	608	Antje	female	1	4	3	AS	Away	same	right	right	position	switch	2	far	4	0	0	unknown	13	29	9	13	31	24	17.36	20
228571	Human	Human	female	608	Antje	female	1	4	3	AS	Away	same	right	right	auditory	vocalization	2	far	4	0	4	unknown	13	31	11	13	31	24	19.44	20
228571	Human	Human	female	608	Antje	female	1	4	3	AS	Away	same	right	right	action	touch	2	far	4	0	0	unknown	13	31	23	13	31	24	19.92	20	pling-machine
228571	Human	Human	female	608	Antje	female	2	5	3	AS	Away	same	left	left	position	start	1	far	1	1	0	unknown	15	56	2	15	59	2	0	3.04
228571	Human	Human	female	608	Antje	female	2	5	3	AS	Away	same	left	left	action	touch	1	far	1	1	0	unknown	15	56	2	16	14	21	0	18.8	pling-machine
228571	Human	Human	female	608	Antje	female	2	5	3	AS	Away	same	left	left	position	turn	1	far	4	0	0	unknown	15	59	3	16	16	1	3.04	20
228571	Human	Human	female	608	Antje	female	2	5	3	AS	Away	same	left	left	auditory	vocalization	1	far	4	0	4	unknown	16	11	10	16	11	17	15.32	15.64
228571	Human	Human	female	608	Antje	female	2	6	4	AD	Away	different	left	right	position	start	1	far	1	1	0	unknown	18	39	8	18	43	5	0	3.92
228571	Human	Human	female	608	Antje	female	2	6	4	AD	Away	different	left	right	position	turn	1	far	4	0	0	unknown	18	43	6	18	45	4	3.92	5.88
228571	Human	Human	female	608	Antje	female	2	6	4	AD	Away	different	left	right	auditory	vocalization	1	far	4	0	4	unknown	18	43	6	18	43	16	3.92	4.36
228571	Human	Human	female	608	Antje	female	2	6	4	AD	Away	different	left	right	position	turn	1	far	1	1	0	unknown	18	45	5	18	52	11	5.88	13.16
228571	Human	Human	female	608	Antje	female	2	6	4	AD	Away	different	left	right	auditory	vocalization	1	far	1	1	4	unknown	18	46	10	18	47	6	7.08	7.96
228571	Human	Human	female	608	Antje	female	2	6	4	AD	Away	different	left	right	auditory	vocalization	1	far	1	1	4	unknown	18	48	1	18	48	15	8.72	9.32
228571	Human	Human	female	608	Antje	female	2	6	4	AD	Away	different	left	right	position	turn	1	far	4	0	0	unknown	18	52	12	18	59	7	13.16	20
228571	Human	Human	female	608	Antje	female	2	6	4	AD	Away	different	left	right	auditory	vocalization	1	far	4	0	4	unknown	18	54	16	18	55	18	15.32	16.44
228571	Human	Human	female	608	Antje	female	2	7	1	TS	Towards	same	right	right	position	start	1	arm	1	1	0	unknown	21	16	3	21	26	21	0	10.76
228571	Human	Human	female	608	Antje	female	2	7	1	TS	Towards	same	right	right	visual	point	1	arm	1	1	1	unknown	21	17	9	21	19	14	1.24	3.48
228571	Human	Human	female	608	Antje	female	2	7	1	TS	Towards	same	right	right	auditory	vocalization	1	arm	1	1	4	unknown	21	17	16	21	18	1	1.52	1.96	verbal ref (da)
228571	Human	Human	female	608	Antje	female	2	7	1	TS	Towards	same	right	right	position	turn	1	arm	4	0	0	unknown	21	26	22	21	31	12	10.76	15.4
228571	Human	Human	female	608	Antje	female	2	7	1	TS	Towards	same	right	right	position	leave	1	far	4	0	0	unknown	21	31	13	21	36	2	15.4	20
228571	Human	Human	female	608	Antje	female	2	7	1	TS	Towards	same	right	right	auditory	vocalization	1	far	4	0	4	unknown	21	31	19	21	32	14	15.64	16.48
228571	Human	Human	female	608	Antje	female	2	7	1	TS	Towards	same	right	right	action	touch	1	far	4	0	0	unknown	21	33	21	21	36	2	17.72	20	pling-machine
228571	Human	Human	female	608	Antje	female	2	8	2	TD	Towards	different	right	left	position	start	1	far	1	1	0	unknown	23	24	9	23	30	19	0	6.44
228571	Human	Human	female	608	Antje	female	2	8	2	TD	Towards	different	right	left	action	touch	1	far	1	1	0	unknown	23	24	9	23	29	5	0	4.88	pling-machine
228571	Human	Human	female	608	Antje	female	2	8	2	TD	Towards	different	right	left	auditory	vocalization	1	far	1	1	4	unknown	23	29	8	23	29	21	4.96	5.52
228571	Human	Human	female	608	Antje	female	2	8	2	TD	Towards	different	right	left	position	approach	1	close	1	1	0	unknown	23	30	20	23	31	17	6.44	7.36
228571	Human	Human	female	608	Antje	female	2	8	2	TD	Towards	different	right	left	position	approach	1	arm	1	1	0	unknown	23	31	18	23	34	10	7.36	10.08
228571	Human	Human	female	608	Antje	female	2	8	2	TD	Towards	different	right	left	position	turn	1	close	4	0	0	unknown	23	34	11	23	35	20	10.08	11.48
228571	Human	Human	female	608	Antje	female	2	8	2	TD	Towards	different	right	left	visual	raise arm	1	close	4	0	4	both hands	23	35	14	23	38	11	11.2	14.12
228571	Human	Human	female	608	Antje	female	2	8	2	TD	Towards	different	right	left	position	switch	2	far	4	0	0	unknown	23	35	21	23	38	22	11.48	14.56
228571	Human	Human	female	608	Antje	female	2	8	2	TD	Towards	different	right	left	auditory	vocalization	2	far	4	0	4	unknown	23	35	23	23	38	11	11.56	14.12
228571	Human	Human	female	608	Antje	female	2	8	2	TD	Towards	different	right	left	position	turn	2	far	1	1	0	unknown	23	38	23	23	39	17	14.56	15.36
228571	Human	Human	female	608	Antje	female	2	8	2	TD	Towards	different	right	left	position	turn	2	far	4	0	0	unknown	23	39	18	23	44	8	15.36	20
228571	Human	Human	female	608	Antje	female	2	8	2	TD	Towards	different	right	left	auditory	vocalization	2	far	4	0	4	unknown	23	41	0	23	42	22	16.64	18.56
228571	Human	Human	female	608	Antje	female	2	8	2	TD	Towards	different	right	left	auditory	vocalization	2	far	4	0	4	unknown	23	43	14	23	44	8	19.2	20
228261	Human	Human	male	602	Heinz	male	1	1	4	AD	Away	different	left	right	position	start	2	far	1	1	0	unknown	5	26	8	5	30	15	0	4.32
228261	Human	Human	male	602	Heinz	male	1	1	4	AD	Away	different	left	right	position	approach	2	close	1	1	0	unknown	5	30	16	5	34	3	4.32	7.84
228261	Human	Human	male	602	Heinz	male	1	1	4	AD	Away	different	left	right	position	switch	1	close	1	1	0	unknown	5	34	4	5	38	8	7.84	12.04
228261	Human	Human	male	602	Heinz	male	1	1	4	AD	Away	different	left	right	position	switch	2	far	4	0	0	unknown	5	38	9	5	46	7	12.04	20
228261	Human	Human	male	602	Heinz	male	1	1	4	AD	Away	different	left	right	action	touch	2	far	4	0	0	unknown	5	41	3	5	41	24	14.8	15.68	pling-machine
228261	Human	Human	male	602	Heinz	male	1	1	4	AD	Away	different	left	right	action	touch	2	far	4	0	0	unknown	5	43	2	5	45	17	16.76	19.4	pling-machine
228261	Human	Human	male	602	Heinz	male	1	1	4	AD	Away	different	left	right	auditory	vocalization	2	far	4	0	4	unknown	5	46	3	5	46	7	19.8	20
228261	Human	Human	male	602	Heinz	male	1	2	1	TS	Towards	same	right	right	position	start	3	far	4	0	0	unknown	7	34	9	7	34	16	0	0.32
228261	Human	Human	male	602	Heinz	male	1	2	1	TS	Towards	same	right	right	action	touch	3	far	4	0	0	unknown	7	34	9	7	37	19	0	3.44	pling-machine
228261	Human	Human	male	602	Heinz	male	1	2	1	TS	Towards	same	right	right	position	turn	3	far	1	1	0	unknown	7	34	17	7	37	10	0.32	3.08
228261	Human	Human	male	602	Heinz	male	1	2	1	TS	Towards	same	right	right	auditory	vocalization	3	far	1	1	4	unknown	7	34	17	7	35	4	0.32	0.84
228261	Human	Human	male	602	Heinz	male	1	2	1	TS	Towards	same	right	right	position	switch	1	far	1	1	0	unknown	7	37	11	7	43	7	3.08	8.96
228261	Human	Human	male	602	Heinz	male	1	2	1	TS	Towards	same	right	right	position	turn	1	far	4	0	0	unknown	7	43	8	7	45	13	8.96	11.2
228261	Human	Human	male	602	Heinz	male	1	2	1	TS	Towards	same	right	right	position	switch	2	far	4	0	0	unknown	7	45	14	7	54	8	11.2	20
228261	Human	Human	male	602	Heinz	male	1	2	1	TS	Towards	same	right	right	action	touch	2	far	4	0	0	unknown	7	47	21	7	50	13	13.48	16.2	pling-machine
228261	Human	Human	male	602	Heinz	male	1	3	2	TD	Towards	different	right	left	position	start	1	far	1	1	0	unknown	9	59	21	10	1	12	0	1.68
228261	Human	Human	male	602	Heinz	male	1	3	2	TD	Towards	different	right	left	action	touch	1	far	1	1	0	unknown	9	59	21	10	10	10	0	10.6	pling-machine
228261	Human	Human	male	602	Heinz	male	1	3	2	TD	Towards	different	right	left	position	turn	1	far	4	0	0	unknown	10	1	13	10	6	2	1.68	6.28
228261	Human	Human	male	602	Heinz	male	1	3	2	TD	Towards	different	right	left	auditory	vocalization	1	far	4	0	4	unknown	10	3	12	10	4	5	3.64	4.4
228261	Human	Human	male	602	Heinz	male	1	3	2	TD	Towards	different	right	left	position	turn	1	far	1	1	0	unknown	10	6	3	10	8	18	6.28	8.92
228261	Human	Human	male	602	Heinz	male	1	3	2	TD	Towards	different	right	left	position	turn	1	far	4	0	0	unknown	10	8	19	10	11	23	8.92	12.12
228261	Human	Human	male	602	Heinz	male	1	3	2	TD	Towards	different	right	left	position	switch	2	far	4	0	0	unknown	10	11	24	10	17	21	12.12	18.04
228261	Human	Human	male	602	Heinz	male	1	3	2	TD	Towards	different	right	left	auditory	vocalization	2	far	4	0	4	unknown	10	15	5	10	15	22	15.36	16.08	vocalizes to parent
228261	Human	Human	male	602	Heinz	male	1	3	2	TD	Towards	different	right	left	position	turn	2	far	2	1	0	unknown	10	17	22	10	19	7	18.04	19.48
228261	Human	Human	male	602	Heinz	male	1	3	2	TD	Towards	different	right	left	position	turn	2	far	4	0	0	unknown	10	19	8	10	19	20	19.48	20
228261	Human	Human	male	602	Heinz	male	1	4	3	AS	Away	same	left	left	position	start	2	arm	2	1	0	unknown	12	28	5	12	31	24	0	3.8
228261	Human	Human	male	602	Heinz	male	1	4	3	AS	Away	same	left	left	position	turn	2	arm	4	0	0	unknown	12	32	0	12	33	24	3.8	5.8
228261	Human	Human	male	602	Heinz	male	1	4	3	AS	Away	same	left	left	position	switch	1	close	1	1	0	unknown	12	34	0	12	38	1	5.8	9.88
228261	Human	Human	male	602	Heinz	male	1	4	3	AS	Away	same	left	left	position	switch	2	arm	2	1	0	unknown	12	38	2	12	40	2	9.88	11.92
228261	Human	Human	male	602	Heinz	male	1	4	3	AS	Away	same	left	left	position	turn	2	arm	4	0	0	unknown	12	40	3	12	41	22	11.92	13.72
228261	Human	Human	male	602	Heinz	male	1	4	3	AS	Away	same	left	left	position	switch	1	arm	1	1	0	unknown	12	41	23	12	48	4	13.72	20
228261	Human	Human	male	602	Heinz	male	2	5	3	AS	Away	same	right	right	position	start	1	close	1	1	0	unknown	14	28	22	14	29	9	0	0.52
228261	Human	Human	male	602	Heinz	male	2	5	3	AS	Away	same	right	right	position	leave	1	far	4	0	0	unknown	14	29	10	14	37	4	0.52	8.32
228261	Human	Human	male	602	Heinz	male	2	5	3	AS	Away	same	right	right	action	touch	1	far	4	0	0	unknown	14	31	2	14	33	6	2.2	4.4	pling-machine
228261	Human	Human	male	602	Heinz	male	2	5	3	AS	Away	same	right	right	auditory	vocalization	1	far	4	0	4	unknown	14	36	6	14	36	11	7.36	7.6
228261	Human	Human	male	602	Heinz	male	2	5	3	AS	Away	same	right	right	action	touch	1	far	4	0	0	unknown	14	36	9	14	37	1	7.48	8.2	pling-machine
228261	Human	Human	male	602	Heinz	male	2	5	3	AS	Away	same	right	right	position	switch	2	arm	2	1	0	unknown	14	37	5	14	41	16	8.32	12.8
228261	Human	Human	male	602	Heinz	male	2	5	3	AS	Away	same	right	right	position	turn	2	arm	4	0	0	unknown	14	41	17	14	43	18	12.8	14.88
228261	Human	Human	male	602	Heinz	male	2	5	3	AS	Away	same	right	right	position	switch	1	close	1	1	0	unknown	14	43	19	14	48	21	14.88	20
227711	Human	Human	female	602	Antje	female	1	1	3	AS	Away	same	right	right	position	start	1	far	1	1	0	unknown	4	23	16	4	25	22	0	2.28
227711	Human	Human	female	602	Antje	female	1	1	3	AS	Away	same	right	right	position	approach	1	arm	1	1	0	unknown	4	25	23	4	30	11	2.28	6.84
227711	Human	Human	female	602	Antje	female	1	1	3	AS	Away	same	right	right	position	turn	1	arm	4	0	0	unknown	4	30	12	4	32	0	6.84	8.4
227711	Human	Human	female	602	Antje	female	1	1	3	AS	Away	same	right	right	position	switch	2	far	4	0	0	unknown	4	32	1	4	35	22	8.4	12.28
227711	Human	Human	female	602	Antje	female	1	1	3	AS	Away	same	right	right	position	turn	2	far	1	1	0	unknown	4	35	23	4	37	7	12.28	13.68
227711	Human	Human	female	602	Antje	female	1	1	3	AS	Away	same	right	right	auditory	vocalization	2	far	1	1	4	unknown	4	36	14	4	37	0	12.92	13.4
227711	Human	Human	female	602	Antje	female	1	1	3	AS	Away	same	right	right	position	turn	2	far	4	0	0	unknown	4	37	8	4	43	15	13.68	20
227711	Human	Human	female	602	Antje	female	1	2	1	TS	Towards	same	left	left	position	start	1	far	1	1	0	unknown	6	47	1	6	51	23	0	4.92
227711	Human	Human	female	602	Antje	female	1	2	1	TS	Towards	same	left	left	auditory	vocalization	1	far	1	1	4	unknown	6	51	11	6	51	21	4.4	4.84
227711	Human	Human	female	602	Antje	female	1	2	1	TS	Towards	same	left	left	position	turn	1	far	4	0	0	unknown	6	51	24	6	58	9	4.92	11.36
227711	Human	Human	female	602	Antje	female	1	2	1	TS	Towards	same	left	left	position	turn	1	far	1	1	0	unknown	6	58	10	7	3	11	11.36	16.44
227711	Human	Human	female	602	Antje	female	1	2	1	TS	Towards	same	left	left	position	turn	1	far	4	0	0	unknown	7	3	12	7	7	0	16.44	20
227711	Human	Human	female	602	Antje	female	1	3	2	TD	Towards	different	left	right	position	start	2	far	1	1	0	unknown	8	38	17	8	41	7	0	2.64
227711	Human	Human	female	602	Antje	female	1	3	2	TD	Towards	different	left	right	position	switch	1	far	1	1	0	unknown	8	41	8	8	42	2	2.64	3.44
227711	Human	Human	female	602	Antje	female	1	3	2	TD	Towards	different	left	right	position	switch	1	far	2	1	0	unknown	8	42	3	8	43	2	3.44	4.44
227711	Human	Human	female	602	Antje	female	1	3	2	TD	Towards	different	left	right	visual	point	1	far	2	1	2	unknown	8	42	10	8	43	7	3.72	4.64
227711	Human	Human	female	602	Antje	female	1	3	2	TD	Towards	different	left	right	position	turn	1	far	1	1	0	unknown	8	43	3	8	44	9	4.44	5.72
227711	Human	Human	female	602	Antje	female	1	3	2	TD	Towards	different	left	right	auditory	vocalization	1	far	1	1	4	unknown	8	43	17	8	44	6	5	5.6
227711	Human	Human	female	602	Antje	female	1	3	2	TD	Towards	different	left	right	position	approach	1	close	1	1	0	unknown	8	44	10	8	50	24	5.72	12.32
227711	Human	Human	female	602	Antje	female	1	3	2	TD	Towards	different	left	right	visual	point	1	close	1	1	2	unknown	8	45	10	8	46	2	6.72	7.44
227711	Human	Human	female	602	Antje	female	1	3	2	TD	Towards	different	left	right	auditory	vocalization	1	close	1	1	4	unknown	8	45	10	8	45	22	6.72	7.24
227711	Human	Human	female	602	Antje	female	1	3	2	TD	Towards	different	left	right	visual	point	1	close	1	1	2	unknown	8	47	5	8	47	16	8.52	9
227711	Human	Human	female	602	Antje	female	1	3	2	TD	Towards	different	left	right	auditory	vocalization	1	close	1	1	4	unknown	8	47	11	8	47	22	8.76	9.24
227711	Human	Human	female	602	Antje	female	1	3	2	TD	Towards	different	left	right	auditory	vocalization	1	close	1	1	4	unknown	8	49	7	8	49	17	10.6	11.04
227711	Human	Human	female	602	Antje	female	1	3	2	TD	Towards	different	left	right	position	turn	1	close	4	0	0	unknown	8	51	0	8	51	18	12.32	13.08
227711	Human	Human	female	602	Antje	female	1	3	2	TD	Towards	different	left	right	position	leave	1	far	4	0	0	unknown	8	51	19	8	58	16	13.08	20
227711	Human	Human	female	602	Antje	female	1	4	4	AD	Away	different	right	left	position	start	1	close	1	1	0	unknown	10	26	11	10	28	11	0	2.04
227711	Human	Human	female	602	Antje	female	1	4	4	AD	Away	different	right	left	auditory	vocalization	1	close	1	1	4	unknown	10	26	20	10	27	9	0.36	0.96
227711	Human	Human	female	602	Antje	female	1	4	4	AD	Away	different	right	left	position	turn	1	close	4	0	0	unknown	10	28	12	10	28	23	2.04	2.52
227711	Human	Human	female	602	Antje	female	1	4	4	AD	Away	different	right	left	position	leave	1	far	4	0	0	unknown	10	28	24	10	30	8	2.52	3.92
227711	Human	Human	female	602	Antje	female	1	4	4	AD	Away	different	right	left	position	switch	2	far	4	0	0	unknown	10	30	9	10	38	6	3.92	11.84
227711	Human	Human	female	602	Antje	female	1	4	4	AD	Away	different	right	left	position	turn	2	far	1	1	0	unknown	10	38	7	10	42	11	11.84	16.04
227711	Human	Human	female	602	Antje	female	1	4	4	AD	Away	different	right	left	auditory	vocalization	2	far	1	1	4	unknown	10	40	6	10	40	12	13.8	14.08
227711	Human	Human	female	602	Antje	female	1	4	4	AD	Away	different	right	left	position	switch	1	far	1	1	0	unknown	10	42	12	10	43	9	16.04	16.96
227711	Human	Human	female	602	Antje	female	1	4	4	AD	Away	different	right	left	position	approach	1	close	1	1	0	unknown	10	43	10	10	44	10	16.96	18
227711	Human	Human	female	602	Antje	female	1	4	4	AD	Away	different	right	left	position	turn	1	close	4	0	0	unknown	10	44	11	10	45	15	18	19.2
227711	Human	Human	female	602	Antje	female	1	4	4	AD	Away	different	right	left	position	switch	2	far	4	0	0	unknown	10	45	16	10	46	10	19.2	20
227711	Human	Human	female	602	Antje	female	2	5	4	AD	Away	different	left	right	position	start	1	far	1	1	0	unknown	12	15	5	12	22	22	0	7.72
227711	Human	Human	female	602	Antje	female	2	5	4	AD	Away	different	left	right	position	turn	1	far	2	1	0	unknown	12	22	23	12	23	24	7.72	8.8
227711	Human	Human	female	602	Antje	female	2	5	4	AD	Away	different	left	right	position	turn	1	far	1	1	0	unknown	12	24	0	12	25	18	8.8	10.56
227711	Human	Human	female	602	Antje	female	2	5	4	AD	Away	different	left	right	position	turn	1	far	4	0	0	unknown	12	25	19	12	29	12	10.56	14.32	PREMATURE TRIAL END
227711	Human	Human	female	602	Antje	female	2	6	2	TD	Towards	different	right	left	position	start	1	arm	1	1	0	unknown	13	51	23	14	11	22	0	20
227711	Human	Human	female	602	Antje	female	2	6	2	TD	Towards	different	right	left	visual	reach	1	arm	1	1	1	unknown	14	7	4	14	10	14	15.24	18.68
227711	Human	Human	female	602	Antje	female	2	7	1	TS	Towards	same	right	right	position	start	1	close	1	1	0	unknown	15	57	8	16	11	21	0	14.56
227711	Human	Human	female	602	Antje	female	2	7	1	TS	Towards	same	right	right	position	turn	1	close	4	0	0	unknown	16	11	22	16	13	2	14.56	15.8
227711	Human	Human	female	602	Antje	female	2	7	1	TS	Towards	same	right	right	position	switch	2	far	4	0	0	unknown	16	13	3	16	14	1	15.8	16.76
227711	Human	Human	female	602	Antje	female	2	7	1	TS	Towards	same	right	right	position	turn	2	far	1	1	0	unknown	16	14	2	16	17	7	16.76	20
227711	Human	Human	female	602	Antje	female	2	7	1	TS	Towards	same	right	right	auditory	vocalization	2	far	1	1	4	unknown	16	16	3	16	16	22	18.8	19.6
227711	Human	Human	female	602	Antje	female	2	8	3	AS	Away	same	left	left	position	start	1	far	1	1	0	unknown	18	4	8	18	11	24	0	7.68
227711	Human	Human	female	602	Antje	female	2	8	3	AS	Away	same	left	left	position	turn	1	far	4	0	0	unknown	18	12	0	18	18	13	7.68	14.24
227711	Human	Human	female	602	Antje	female	2	8	3	AS	Away	same	left	left	position	turn	1	far	1	1	0	unknown	18	18	14	18	23	18	14.24	19.44
227711	Human	Human	female	602	Antje	female	2	8	3	AS	Away	same	left	left	auditory	vocalization	1	far	1	1	4	unknown	18	20	6	18	20	19	15.92	16.48
227711	Human	Human	female	602	Antje	female	2	8	3	AS	Away	same	left	left	position	approach	1	close	1	1	0	unknown	18	23	19	18	24	7	19.44	20
227711	Human	Human	female	602	Antje	female	2	8	3	AS	Away	same	left	left	auditory	vocalization	1	close	1	1	4	unknown	18	23	19	18	24	6	19.44	19.96
232261	Human	Human	male	613	Antje	female	1	1	1	TS	Towards	same	left	left	position	start	1	far	1	1	0	unknown	5	32	18	5	37	4	0	4.48
232261	Human	Human	male	613	Antje	female	1	1	1	TS	Towards	same	left	left	position	approach	1	close	1	1	0	unknown	5	37	5	5	38	15	4.48	5.92
232261	Human	Human	male	613	Antje	female	1	1	1	TS	Towards	same	left	left	position	turn	1	close	4	0	0	unknown	5	38	16	5	52	17	5.92	20
232261	Human	Human	male	613	Antje	female	1	1	1	TS	Towards	same	left	left	auditory	vocalization	1	close	4	0	4	unknown	5	43	18	5	44	1	11	11.36
232261	Human	Human	male	613	Antje	female	1	1	1	TS	Towards	same	left	left	auditory	vocalization	1	close	4	0	4	unknown	5	45	0	5	45	8	12.28	12.64
232261	Human	Human	male	613	Antje	female	1	1	1	TS	Towards	same	left	left	auditory	vocalization	1	close	4	0	4	unknown	5	45	21	5	46	19	13.12	14.08
232261	Human	Human	male	613	Antje	female	1	1	1	TS	Towards	same	left	left	auditory	bang	1	close	4	0	4	foot	5	47	10	5	47	20	14.68	15.12
232261	Human	Human	male	613	Antje	female	1	1	1	TS	Towards	same	left	left	auditory	vocalization	1	close	4	0	4	unknown	5	47	22	5	48	8	15.16	15.64
232261	Human	Human	male	613	Antje	female	1	1	1	TS	Towards	same	left	left	auditory	vocalization	1	close	4	0	4	unknown	5	48	21	5	49	5	16.12	16.52
232261	Human	Human	male	613	Antje	female	1	1	1	TS	Towards	same	left	left	auditory	vocalization	1	close	4	0	4	unknown	5	50	23	5	51	13	18.2	18.84
232261	Human	Human	male	613	Antje	female	1	2	3	AS	Away	same	right	right	position	start	2	far	1	1	0	unknown	8	43	22	8	47	5	0	3.36
232261	Human	Human	male	613	Antje	female	1	2	3	AS	Away	same	right	right	visual	point	2	far	1	1	1	unknown	8	44	10	8	46	10	0.52	2.56
232261	Human	Human	male	613	Antje	female	1	2	3	AS	Away	same	right	right	auditory	vocalization	2	far	1	1	4	unknown	8	44	12	8	45	6	0.6	1.4
232261	Human	Human	male	613	Antje	female	1	2	3	AS	Away	same	right	right	auditory	vocalization	2	far	1	1	4	unknown	8	45	13	8	45	24	1.64	2.12
232261	Human	Human	male	613	Antje	female	1	2	3	AS	Away	same	right	right	auditory	vocalization	2	far	1	1	4	unknown	8	46	11	8	46	18	2.56	2.88
232261	Human	Human	male	613	Antje	female	1	2	3	AS	Away	same	right	right	position	turn	2	far	4	0	0	unknown	8	47	6	9	3	21	3.36	20
232261	Human	Human	male	613	Antje	female	1	2	3	AS	Away	same	right	right	auditory	vocalization	2	far	4	0	4	unknown	8	48	13	8	49	3	4.64	5.28
232261	Human	Human	male	613	Antje	female	1	2	3	AS	Away	same	right	right	auditory	vocalization	2	far	4	0	4	unknown	8	50	22	8	51	2	7	7.24
232261	Human	Human	male	613	Antje	female	1	2	3	AS	Away	same	right	right	auditory	vocalization	2	far	4	0	4	unknown	8	53	2	8	53	11	9.2	9.6
232261	Human	Human	male	613	Antje	female	1	2	3	AS	Away	same	right	right	auditory	vocalization	2	far	4	0	4	unknown	8	54	1	8	55	0	10.16	11.16
232261	Human	Human	male	613	Antje	female	1	2	3	AS	Away	same	right	right	auditory	vocalization	2	far	4	0	4	unknown	8	55	24	8	58	18	12.08	14.88
232261	Human	Human	male	613	Antje	female	1	2	3	AS	Away	same	right	right	auditory	vocalization	2	far	4	0	4	unknown	9	0	12	9	0	19	16.6	16.92
232261	Human	Human	male	613	Antje	female	1	2	3	AS	Away	same	right	right	auditory	vocalization	2	far	4	0	4	unknown	9	1	14	9	1	19	17.68	17.92
232261	Human	Human	male	613	Antje	female	1	3	4	AD	Away	different	right	left	position	start	2	far	2	1	0	unknown	11	42	0	11	42	15	0	0.64
232261	Human	Human	male	613	Antje	female	1	3	4	AD	Away	different	right	left	position	turn	2	far	1	1	0	unknown	11	42	16	11	44	5	0.64	2.24
232261	Human	Human	male	613	Antje	female	1	3	4	AD	Away	different	right	left	visual	point	2	far	1	1	1	unknown	11	43	13	11	45	17	1.52	3.72
232261	Human	Human	male	613	Antje	female	1	3	4	AD	Away	different	right	left	position	approach	1	close	1	1	0	unknown	11	44	6	11	47	7	2.24	5.32
232261	Human	Human	male	613	Antje	female	1	3	4	AD	Away	different	right	left	auditory	vocalization	1	close	1	1	4	unknown	11	44	6	11	44	17	2.24	2.72
232261	Human	Human	male	613	Antje	female	1	3	4	AD	Away	different	right	left	auditory	vocalization	1	close	1	1	4	unknown	11	45	15	11	46	4	3.6	4.2
232261	Human	Human	male	613	Antje	female	1	3	4	AD	Away	different	right	left	auditory	vocalization	1	close	1	1	4	unknown	11	47	3	11	47	16	5.12	5.68
232261	Human	Human	male	613	Antje	female	1	3	4	AD	Away	different	right	left	position	leave	2	far	4	0	0	unknown	11	47	8	11	55	18	5.32	13.76
232261	Human	Human	male	613	Antje	female	1	3	4	AD	Away	different	right	left	action	touch	2	far	4	0	0	unknown	11	50	0	11	55	9	8	13.4	pling-machine
232261	Human	Human	male	613	Antje	female	1	3	4	AD	Away	different	right	left	position	switch	1	far	4	0	0	unknown	11	55	19	12	1	24	13.76	20
232261	Human	Human	male	613	Antje	female	1	3	4	AD	Away	different	right	left	action	touch	1	far	4	0	0	unknown	11	56	7	12	1	24	14.28	20
232261	Human	Human	male	613	Antje	female	1	3	4	AD	Away	different	right	left	auditory	vocalization	1	far	4	0	4	unknown	11	57	2	11	57	9	15.08	15.4
232261	Human	Human	male	613	Antje	female	1	3	4	AD	Away	different	right	left	auditory	vocalization	1	far	4	0	4	unknown	12	1	6	12	1	12	19.24	19.52
232261	Human	Human	male	613	Antje	female	1	4	2	TD	Towards	different	left	right	position	start	1	far	2	1	0	unknown	14	41	3	14	41	17	0	0.6
232261	Human	Human	male	613	Antje	female	1	4	2	TD	Towards	different	left	right	visual	point	1	far	2	1	2	unknown	14	41	11	14	44	2	0.32	3
232261	Human	Human	male	613	Antje	female	1	4	2	TD	Towards	different	left	right	auditory	vocalization	1	far	2	1	4	unknown	14	41	11	14	41	23	0.32	0.84
232261	Human	Human	male	613	Antje	female	1	4	2	TD	Towards	different	left	right	position	approach	2	close	2	1	0	unknown	14	41	18	14	44	20	0.6	3.72
232261	Human	Human	male	613	Antje	female	1	4	2	TD	Towards	different	left	right	auditory	vocalization	2	close	2	1	4	unknown	14	43	12	14	44	2	2.36	3
232261	Human	Human	male	613	Antje	female	1	4	2	TD	Towards	different	left	right	position	approach	2	arm	2	1	0	unknown	14	44	21	14	48	13	3.72	7.44
232261	Human	Human	male	613	Antje	female	1	4	2	TD	Towards	different	left	right	visual	point	2	arm	2	1	2	unknown	14	44	21	14	46	3	3.72	5.04
232261	Human	Human	male	613	Antje	female	1	4	2	TD	Towards	different	left	right	auditory	vocalization	2	arm	2	1	4	unknown	14	44	21	14	45	18	3.72	4.64
232261	Human	Human	male	613	Antje	female	1	4	2	TD	Towards	different	left	right	auditory	vocalization	2	arm	2	1	4	unknown	14	46	11	14	46	18	5.32	5.64
232261	Human	Human	male	613	Antje	female	1	4	2	TD	Towards	different	left	right	position	leave	1	far	1	1	0	unknown	14	48	14	14	55	13	7.44	14.44
232261	Human	Human	male	613	Antje	female	1	4	2	TD	Towards	different	left	right	auditory	vocalization	1	far	1	1	4	unknown	14	48	14	14	49	6	7.44	8.16
232261	Human	Human	male	613	Antje	female	1	4	2	TD	Towards	different	left	right	visual	point	1	far	1	1	2	unknown	14	49	20	14	51	4	8.68	10.08
232261	Human	Human	male	613	Antje	female	1	4	2	TD	Towards	different	left	right	auditory	vocalization	1	far	1	1	4	unknown	14	50	2	14	50	18	8.96	9.64
232261	Human	Human	male	613	Antje	female	1	4	2	TD	Towards	different	left	right	auditory	vocalization	1	far	1	1	4	unknown	14	52	4	14	52	22	11.04	11.8
232261	Human	Human	male	613	Antje	female	1	4	2	TD	Towards	different	left	right	auditory	vocalization	1	far	1	1	4	unknown	14	54	21	14	55	4	13.72	14.08
232261	Human	Human	male	613	Antje	female	1	4	2	TD	Towards	different	left	right	position	turn	1	far	2	1	0	unknown	14	55	14	15	1	2	14.44	20
232261	Human	Human	male	613	Antje	female	2	5	2	TD	Towards	different	right	left	position	start	1	far	4	0	0	unknown	16	58	8	17	8	7	0	10
232261	Human	Human	male	613	Antje	female	2	5	2	TD	Towards	different	right	left	position	turn	1	far	1	1	0	unknown	17	8	8	17	13	12	10	15.2
232261	Human	Human	male	613	Antje	female	2	5	2	TD	Towards	different	right	left	auditory	vocalization	1	far	1	1	4	unknown	17	12	24	17	13	10	14.64	15.12
232261	Human	Human	male	613	Antje	female	2	5	2	TD	Towards	different	right	left	position	approach	1	close	1	1	0	unknown	17	13	13	17	18	7	15.2	20
232261	Human	Human	male	613	Antje	female	2	5	2	TD	Towards	different	right	left	visual	point	1	close	1	1	1	unknown	17	13	13	17	15	9	15.2	17.08
232261	Human	Human	male	613	Antje	female	2	5	2	TD	Towards	different	right	left	auditory	vocalization	1	close	1	1	4	unknown	17	13	19	17	14	2	15.44	15.8	verbal ref (da)
232261	Human	Human	male	613	Antje	female	2	5	2	TD	Towards	different	right	left	auditory	vocalization	1	close	1	1	4	unknown	17	15	2	17	15	10	16.76	17.12	verbal (hier?)
232261	Human	Human	male	613	Antje	female	2	6	4	AD	Away	different	left	right	position	start	1	far	4	0	0	unknown	19	12	7	19	31	3	0	18.88
232261	Human	Human	male	613	Antje	female	2	6	4	AD	Away	different	left	right	action	touch	1	far	4	0	0	unknown	19	15	10	19	15	19	3.12	3.52	pling-machine
232261	Human	Human	male	613	Antje	female	2	6	4	AD	Away	different	left	right	auditory	vocalization	1	far	4	0	4	unknown	19	16	12	19	17	8	4.2	5.08
232261	Human	Human	male	613	Antje	female	2	6	4	AD	Away	different	left	right	auditory	vocalization	1	far	4	0	4	unknown	19	18	15	19	19	7	6.32	7.04
232261	Human	Human	male	613	Antje	female	2	6	4	AD	Away	different	left	right	position	turn	1	far	1	1	0	unknown	19	31	4	19	32	6	18.88	20
230481	Human	Human	female	606	Heinz	male	1	1	2	TD	Towards	different	left	right	position	start	1	arm	4	0	0	unknown	5	2	0	5	2	24	0	1
230481	Human	Human	female	606	Heinz	male	1	1	2	TD	Towards	different	left	right	position	leave	1	far	4	0	0	unknown	5	3	0	5	3	14	1	1.6
230481	Human	Human	female	606	Heinz	male	1	1	2	TD	Towards	different	left	right	auditory	vocalization	1	far	4	0	4	unknown	5	3	5	5	3	16	1.2	1.68
230481	Human	Human	female	606	Heinz	male	1	1	2	TD	Towards	different	left	right	position	turn	1	far	1	1	0	unknown	5	3	15	5	5	11	1.6	3.48
230481	Human	Human	female	606	Heinz	male	1	1	2	TD	Towards	different	left	right	position	turn	1	far	4	0	0	unknown	5	5	12	5	7	12	3.48	5.52
230481	Human	Human	female	606	Heinz	male	1	1	2	TD	Towards	different	left	right	auditory	vocalization	1	far	4	0	4	unknown	5	6	10	5	7	1	4.4	5.08
230481	Human	Human	female	606	Heinz	male	1	1	2	TD	Towards	different	left	right	position	turn	1	far	1	1	0	unknown	5	7	13	5	8	11	5.52	6.48
230481	Human	Human	female	606	Heinz	male	1	1	2	TD	Towards	different	left	right	position	turn	1	far	4	0	0	unknown	5	8	12	5	15	24	6.48	14
230481	Human	Human	female	606	Heinz	male	1	1	2	TD	Towards	different	left	right	action	touch	1	far	4	0	0	unknown	5	14	6	5	21	24	12.24	20	pling-machine
230481	Human	Human	female	606	Heinz	male	1	1	2	TD	Towards	different	left	right	auditory	vocalization	1	far	4	0	4	unknown	5	14	16	5	15	4	12.64	13.2
230481	Human	Human	female	606	Heinz	male	1	1	2	TD	Towards	different	left	right	position	turn	1	far	1	1	0	unknown	5	16	0	5	17	0	14	15.04
230481	Human	Human	female	606	Heinz	male	1	1	2	TD	Towards	different	left	right	position	turn	1	far	4	0	0	unknown	5	17	1	5	21	24	15.04	20
230481	Human	Human	female	606	Heinz	male	1	2	1	TS	Towards	same	right	right	position	start	1	close	2	1	0	unknown	7	8	13	7	9	11	0	0.96
230481	Human	Human	female	606	Heinz	male	1	2	1	TS	Towards	same	right	right	position	switch	2	close	2	1	0	unknown	7	9	12	7	11	8	0.96	2.84
230481	Human	Human	female	606	Heinz	male	1	2	1	TS	Towards	same	right	right	position	approach	2	arm	2	1	0	unknown	7	11	9	7	11	22	2.84	3.4
230481	Human	Human	female	606	Heinz	male	1	2	1	TS	Towards	same	right	right	position	turn	2	arm	4	0	0	unknown	7	11	23	7	17	5	3.4	8.72
230481	Human	Human	female	606	Heinz	male	1	2	1	TS	Towards	same	right	right	position	leave	2	far	4	0	0	unknown	7	17	6	7	28	12	8.72	20
230481	Human	Human	female	606	Heinz	male	1	2	1	TS	Towards	same	right	right	auditory	vocalization	2	far	4	0	4	unknown	7	19	2	7	19	17	10.56	11.2
230481	Human	Human	female	606	Heinz	male	1	2	1	TS	Towards	same	right	right	action	touch	2	far	4	0	0	unknown	7	26	12	7	28	12	17.96	20	pling-machine
230481	Human	Human	female	606	Heinz	male	1	3	3	AS	Away	same	left	left	position	start	1	arm	1	1	0	unknown	9	29	18	9	36	10	0	6.72
230481	Human	Human	female	606	Heinz	male	1	3	3	AS	Away	same	left	left	position	turn	1	arm	4	0	0	unknown	9	36	11	9	38	4	6.72	8.48
230481	Human	Human	female	606	Heinz	male	1	3	3	AS	Away	same	left	left	position	turn	1	close	1	1	0	unknown	9	38	5	9	40	12	8.48	10.8
230481	Human	Human	female	606	Heinz	male	1	3	3	AS	Away	same	left	left	position	approach	1	arm	1	1	0	unknown	9	40	13	9	42	9	10.8	12.68
230481	Human	Human	female	606	Heinz	male	1	3	3	AS	Away	same	left	left	position	turn	1	arm	4	0	0	unknown	9	42	10	9	45	1	12.68	15.36
230481	Human	Human	female	606	Heinz	male	1	3	3	AS	Away	same	left	left	auditory	bang	1	arm	4	0	1	foot	9	44	19	9	44	24	15.04	15.28
230481	Human	Human	female	606	Heinz	male	1	3	3	AS	Away	same	left	left	position	turn	1	arm	1	1	0	unknown	9	45	2	9	49	17	15.36	20
230481	Human	Human	female	606	Heinz	male	1	4	4	AD	Away	different	right	left	position	start	2	far	1	1	0	unknown	11	51	20	11	52	14	0	0.8
230481	Human	Human	female	606	Heinz	male	1	4	4	AD	Away	different	right	left	position	turn	2	far	4	0	0	unknown	11	52	15	12	11	19	0.8	20
230481	Human	Human	female	606	Heinz	male	1	4	4	AD	Away	different	right	left	auditory	bang	2	far	4	0	4	foot	11	55	14	11	56	16	3.76	4.88
230481	Human	Human	female	606	Heinz	male	1	4	4	AD	Away	different	right	left	auditory	vocalization	2	far	4	0	4	unknown	11	56	11	11	57	2	4.64	5.32
230481	Human	Human	female	606	Heinz	male	1	4	4	AD	Away	different	right	left	auditory	vocalization	2	far	4	0	4	unknown	11	57	7	11	57	19	5.48	6
230481	Human	Human	female	606	Heinz	male	1	4	4	AD	Away	different	right	left	auditory	vocalization	2	far	4	0	4	unknown	11	58	0	11	58	14	6.2	6.8
230481	Human	Human	female	606	Heinz	male	1	4	4	AD	Away	different	right	left	auditory	vocalization	2	far	4	0	4	unknown	12	1	13	12	1	23	9.72	10.16
230481	Human	Human	female	606	Heinz	male	2	5	4	AD	Away	different	left	right	position	start	1	far	1	1	0	unknown	14	57	2	14	59	10	0	2.36
230481	Human	Human	female	606	Heinz	male	2	5	4	AD	Away	different	left	right	action	touch	1	far	1	1	0	unknown	14	57	2	15	17	1	0	20	pling-machine
230481	Human	Human	female	606	Heinz	male	2	5	4	AD	Away	different	left	right	position	turn	1	far	4	0	0	unknown	14	59	11	15	5	9	2.36	8.32
230481	Human	Human	female	606	Heinz	male	2	5	4	AD	Away	different	left	right	position	turn	1	far	1	1	0	unknown	15	5	10	15	9	10	8.32	12.36
230481	Human	Human	female	606	Heinz	male	2	5	4	AD	Away	different	left	right	position	turn	1	far	4	0	0	unknown	15	9	11	15	14	24	12.36	17.92
230481	Human	Human	female	606	Heinz	male	2	5	4	AD	Away	different	left	right	visual	point	1	far	4	0	4	unknown	15	12	3	15	13	2	15.04	16.04	point (away)
230481	Human	Human	female	606	Heinz	male	2	5	4	AD	Away	different	left	right	auditory	vocalization	1	far	4	0	4	unknown	15	12	7	15	12	20	15.2	15.76
230481	Human	Human	female	606	Heinz	male	2	5	4	AD	Away	different	left	right	position	turn	1	far	1	1	0	unknown	15	15	0	15	17	1	17.92	20
230481	Human	Human	female	606	Heinz	male	2	6	3	AS	Away	same	right	right	position	start	2	far	1	1	0	unknown	18	10	12	18	16	19	0	6.32
230481	Human	Human	female	606	Heinz	male	2	6	3	AS	Away	same	right	right	position	turn	2	far	4	0	0	unknown	18	16	20	18	26	7	6.32	15.84
230481	Human	Human	female	606	Heinz	male	2	6	3	AS	Away	same	right	right	auditory	vocalization	2	far	4	0	4	unknown	18	20	15	18	21	20	10.12	11.36
230481	Human	Human	female	606	Heinz	male	2	6	3	AS	Away	same	right	right	auditory	vocalization	2	far	4	0	4	unknown	18	22	20	18	23	1	12.32	12.6
230481	Human	Human	female	606	Heinz	male	2	6	3	AS	Away	same	right	right	auditory	vocalization	2	far	4	0	4	unknown	18	23	16	18	24	24	13.16	14.52
230481	Human	Human	female	606	Heinz	male	2	6	3	AS	Away	same	right	right	position	turn	2	far	2	1	0	unknown	18	26	8	18	30	11	15.84	20
230481	Human	Human	female	606	Heinz	male	2	7	2	TD	Towards	different	left	right	position	start	1	far	1	1	0	unknown	20	24	17	20	39	11	0	14.8
230481	Human	Human	female	606	Heinz	male	2	7	2	TD	Towards	different	left	right	action	touch	1	far	1	1	0	unknown	20	24	17	20	37	13	0	12.88	pling-machine
230481	Human	Human	female	606	Heinz	male	2	7	2	TD	Towards	different	left	right	position	approach	1	arm	1	1	0	unknown	20	39	12	20	40	4	14.8	15.52
230481	Human	Human	female	606	Heinz	male	2	7	2	TD	Towards	different	left	right	position	turn	1	arm	4	0	0	unknown	20	40	5	20	41	3	15.52	16.48
230481	Human	Human	female	606	Heinz	male	2	7	2	TD	Towards	different	left	right	position	leave	1	far	4	0	0	unknown	20	41	4	20	43	0	16.48	18.36
230481	Human	Human	female	606	Heinz	male	2	7	2	TD	Towards	different	left	right	position	turn	1	far	1	1	0	unknown	20	43	1	20	44	16	18.36	20
228351	Human	Human	male	602	Antje	female	1	1	1	TS	Towards	same	left	left	position	start	1	arm	1	1	0	unknown	4	11	4	4	22	9	0	11.24
228351	Human	Human	male	602	Antje	female	1	1	1	TS	Towards	same	left	left	visual	point	1	arm	1	1	1	unknown	4	11	4	4	14	5	0	3.08
228351	Human	Human	male	602	Antje	female	1	1	1	TS	Towards	same	left	left	auditory	vocalization	1	arm	1	1	4	unknown	4	11	17	4	13	0	0.52	1.88
228351	Human	Human	male	602	Antje	female	1	1	1	TS	Towards	same	left	left	auditory	vocalization	1	arm	1	1	4	unknown	4	14	10	4	15	23	3.24	4.8
228351	Human	Human	male	602	Antje	female	1	1	1	TS	Towards	same	left	left	visual	point	1	arm	1	1	1	unknown	4	15	1	4	15	18	3.88	4.6
228351	Human	Human	male	602	Antje	female	1	1	1	TS	Towards	same	left	left	auditory	vocalization	1	arm	1	1	4	unknown	4	16	12	4	17	19	5.32	6.64
228351	Human	Human	male	602	Antje	female	1	1	1	TS	Towards	same	left	left	visual	reach	1	arm	1	1	1	unknown	4	17	4	4	22	9	6	11.24
228351	Human	Human	male	602	Antje	female	1	1	1	TS	Towards	same	left	left	auditory	vocalization	1	arm	1	1	4	unknown	4	18	15	4	20	3	7.44	9
228351	Human	Human	male	602	Antje	female	1	1	1	TS	Towards	same	left	left	auditory	vocalization	1	arm	1	1	4	unknown	4	21	16	4	22	16	10.48	11.52
228351	Human	Human	male	602	Antje	female	1	1	1	TS	Towards	same	left	left	position	turn	1	arm	4	0	0	unknown	4	22	10	4	24	16	11.24	13.52
228351	Human	Human	male	602	Antje	female	1	1	1	TS	Towards	same	left	left	position	leave	1	far	4	0	0	unknown	4	24	17	4	25	21	13.52	14.72
228351	Human	Human	male	602	Antje	female	1	1	1	TS	Towards	same	left	left	position	switch	2	far	4	0	0	unknown	4	25	22	4	30	4	14.72	19.04
228351	Human	Human	male	602	Antje	female	1	1	1	TS	Towards	same	left	left	action	touch	2	far	4	0	0	unknown	4	27	1	4	29	12	15.88	18.36	pling-machine
228351	Human	Human	male	602	Antje	female	1	1	1	TS	Towards	same	left	left	position	turn	2	far	1	1	0	unknown	4	30	5	4	31	3	19.04	20
228351	Human	Human	male	602	Antje	female	1	2	4	AD	Away	different	right	left	position	start	2	close	1	1	0	unknown	6	2	20	6	3	17	0	0.92
228351	Human	Human	male	602	Antje	female	1	2	4	AD	Away	different	right	left	position	switch	1	arm	1	1	0	unknown	6	3	18	6	8	10	0.92	5.64
228351	Human	Human	male	602	Antje	female	1	2	4	AD	Away	different	right	left	position	turn	1	arm	2	1	0	unknown	6	8	11	6	10	8	5.64	7.56
228351	Human	Human	male	602	Antje	female	1	2	4	AD	Away	different	right	left	auditory	vocalization	1	arm	2	1	4	unknown	6	9	0	6	9	8	6.2	6.56
228351	Human	Human	male	602	Antje	female	1	2	4	AD	Away	different	right	left	position	switch	2	close	4	0	0	unknown	6	10	9	6	10	14	7.56	7.8
228351	Human	Human	male	602	Antje	female	1	2	4	AD	Away	different	right	left	position	leave	2	far	4	0	0	unknown	6	10	15	6	15	0	7.8	12.24	leave to parent
228351	Human	Human	male	602	Antje	female	1	2	4	AD	Away	different	right	left	position	turn	2	far	1	1	0	unknown	6	15	1	6	17	21	12.24	15.08
228351	Human	Human	male	602	Antje	female	1	2	4	AD	Away	different	right	left	position	switch	1	close	1	1	0	unknown	6	17	22	6	18	19	15.08	16
228351	Human	Human	male	602	Antje	female	1	2	4	AD	Away	different	right	left	position	approach	1	arm	1	1	0	unknown	6	18	20	6	22	9	16	19.6
228351	Human	Human	male	602	Antje	female	1	2	4	AD	Away	different	right	left	position	turn	1	arm	4	0	0	unknown	6	22	10	6	22	19	19.6	20
228351	Human	Human	male	602	Antje	female	1	3	2	TD	Towards	different	left	right	position	start	1	arm	1	1	0	unknown	8	2	21	8	6	15	0	3.8
228351	Human	Human	male	602	Antje	female	1	3	2	TD	Towards	different	left	right	position	turn	1	arm	2	1	0	unknown	8	6	16	8	8	6	3.8	5.44
228351	Human	Human	male	602	Antje	female	1	3	2	TD	Towards	different	left	right	auditory	vocalization	1	arm	2	1	4	unknown	8	7	18	8	8	1	4.88	5.24
228351	Human	Human	male	602	Antje	female	1	3	2	TD	Towards	different	left	right	position	switch	2	close	2	1	0	unknown	8	8	7	8	8	11	5.44	5.64
228351	Human	Human	male	602	Antje	female	1	3	2	TD	Towards	different	left	right	position	turn	2	close	4	0	0	unknown	8	8	12	8	10	12	5.64	7.68
228351	Human	Human	male	602	Antje	female	1	3	2	TD	Towards	different	left	right	auditory	vocalization	2	close	4	0	4	unknown	8	8	12	8	10	12	5.64	7.68
228351	Human	Human	male	602	Antje	female	1	3	2	TD	Towards	different	left	right	visual	point	2	close	4	0	2	unknown	8	10	4	8	10	19	7.32	7.96
228351	Human	Human	male	602	Antje	female	1	3	2	TD	Towards	different	left	right	position	turn	2	close	2	1	0	unknown	8	10	13	8	11	16	7.68	8.84
228351	Human	Human	male	602	Antje	female	1	3	2	TD	Towards	different	left	right	auditory	vocalization	2	close	2	1	4	unknown	8	11	7	8	13	1	8.44	10.24
228351	Human	Human	male	602	Antje	female	1	3	2	TD	Towards	different	left	right	position	turn	2	close	4	0	0	unknown	8	11	17	8	13	16	8.84	10.84
228351	Human	Human	male	602	Antje	female	1	3	2	TD	Towards	different	left	right	position	leave	2	far	4	0	0	unknown	8	13	17	8	15	1	10.84	12.24
228351	Human	Human	male	602	Antje	female	1	3	2	TD	Towards	different	left	right	position	switch	1	far	4	0	0	unknown	8	15	2	8	20	13	12.24	17.72
228351	Human	Human	male	602	Antje	female	1	3	2	TD	Towards	different	left	right	auditory	vocalization	1	far	4	0	4	unknown	8	18	22	8	19	2	16.04	16.28
228351	Human	Human	male	602	Antje	female	1	3	2	TD	Towards	different	left	right	auditory	vocalization	1	far	4	0	4	unknown	8	19	14	8	20	5	16.72	17.4
228351	Human	Human	male	602	Antje	female	1	3	2	TD	Towards	different	left	right	position	turn	1	far	1	1	0	unknown	8	20	14	8	22	20	17.72	20
228351	Human	Human	male	602	Antje	female	1	4	3	AS	Away	same	right	right	position	start	2	arm	2	1	0	unknown	9	50	18	9	51	4	0	0.48
228351	Human	Human	male	602	Antje	female	1	4	3	AS	Away	same	right	right	position	turn	2	arm	1	1	0	unknown	9	51	5	9	54	6	0.48	3.56
228351	Human	Human	male	602	Antje	female	1	4	3	AS	Away	same	right	right	auditory	bang	2	arm	1	1	2	unknown	9	52	14	9	56	13	1.84	5.84	7x
228351	Human	Human	male	602	Antje	female	1	4	3	AS	Away	same	right	right	position	turn	2	arm	2	1	0	unknown	9	54	7	10	6	13	3.56	15.84
228351	Human	Human	male	602	Antje	female	1	4	3	AS	Away	same	right	right	auditory	bang	2	arm	2	1	2	unknown	9	58	5	10	1	16	7.48	10.96	4x
228351	Human	Human	male	602	Antje	female	1	4	3	AS	Away	same	right	right	visual	reach	2	arm	2	1	2	unknown	10	4	12	10	6	4	13.76	15.48
228351	Human	Human	male	602	Antje	female	1	4	3	AS	Away	same	right	right	position	turn	2	arm	4	0	0	unknown	10	6	14	10	10	4	15.84	19.48
228351	Human	Human	male	602	Antje	female	1	4	3	AS	Away	same	right	right	position	leave	2	far	4	0	0	unknown	10	10	5	10	10	17	19.48	20
228351	Human	Human	male	602	Antje	female	2	5	3	AS	Away	same	left	left	position	start	1	arm	1	1	0	unknown	11	58	21	12	1	23	0	3.12
228351	Human	Human	male	602	Antje	female	2	5	3	AS	Away	same	left	left	visual	reach	1	arm	1	1	1	unknown	11	58	21	12	5	15	0	6.8
228351	Human	Human	male	602	Antje	female	2	5	3	AS	Away	same	left	left	auditory	vocalization	1	arm	1	1	4	unknown	12	1	11	12	3	5	2.6	4.4
228351	Human	Human	male	602	Antje	female	2	5	3	AS	Away	same	left	left	position	turn	1	arm	4	0	0	unknown	12	1	24	12	3	4	3.12	4.36
228351	Human	Human	male	602	Antje	female	2	5	3	AS	Away	same	left	left	position	turn	1	arm	1	1	0	unknown	12	3	5	12	10	24	4.36	12.16
228351	Human	Human	male	602	Antje	female	2	5	3	AS	Away	same	left	left	auditory	vocalization	1	arm	1	1	4	unknown	12	7	12	12	7	20	8.64	9
228351	Human	Human	male	602	Antje	female	2	5	3	AS	Away	same	left	left	auditory	vocalization	1	arm	1	1	4	unknown	12	10	17	12	12	4	11.84	13.36
228351	Human	Human	male	602	Antje	female	2	5	3	AS	Away	same	left	left	position	turn	1	arm	4	0	0	unknown	12	11	0	12	12	24	12.16	14.16
228351	Human	Human	male	602	Antje	female	2	5	3	AS	Away	same	left	left	position	leave	1	far	4	0	0	unknown	12	13	0	12	13	24	14.16	15.16
228351	Human	Human	male	602	Antje	female	2	5	3	AS	Away	same	left	left	position	switch	2	far	4	0	0	unknown	12	14	0	12	18	20	15.16	20
228351	Human	Human	male	602	Antje	female	2	6	2	TD	Towards	different	right	left	position	start	1	arm	1	1	0	unknown	13	38	7	13	53	5	0	14.96
228351	Human	Human	male	602	Antje	female	2	6	2	TD	Towards	different	right	left	auditory	vocalization	1	arm	1	1	4	unknown	13	39	5	13	39	23	0.92	1.68
228351	Human	Human	male	602	Antje	female	2	6	2	TD	Towards	different	right	left	auditory	bang	1	arm	1	1	1	unknown	13	39	23	13	44	1	1.64	5.8	6x
228351	Human	Human	male	602	Antje	female	2	6	2	TD	Towards	different	right	left	position	turn	1	arm	2	1	0	unknown	13	53	6	13	55	7	14.96	17.04
228351	Human	Human	male	602	Antje	female	2	6	2	TD	Towards	different	right	left	position	switch	2	close	2	1	0	unknown	13	55	8	13	58	6	17.04	20
228351	Human	Human	male	602	Antje	female	2	7	4	AD	Away	different	left	right	position	start	1	close	1	1	0	unknown	15	15	10	15	16	4	0	0.8
228351	Human	Human	male	602	Antje	female	2	7	4	AD	Away	different	left	right	position	approach	1	arm	1	1	0	unknown	15	16	5	15	26	6	0.8	10.88
228351	Human	Human	male	602	Antje	female	2	7	4	AD	Away	different	left	right	auditory	bang	1	arm	1	1	1	unknown	15	20	17	15	23	8	5.28	7.96	3x
228351	Human	Human	male	602	Antje	female	2	7	4	AD	Away	different	left	right	position	turn	1	arm	2	1	0	unknown	15	26	7	15	28	20	10.88	13.44
228351	Human	Human	male	602	Antje	female	2	7	4	AD	Away	different	left	right	position	switch	2	arm	2	1	0	unknown	15	28	21	15	33	16	13.44	18.28
228351	Human	Human	male	602	Antje	female	2	7	4	AD	Away	different	left	right	position	turn	2	arm	4	0	0	unknown	15	33	17	15	35	1	18.28	19.68
228351	Human	Human	male	602	Antje	female	2	7	4	AD	Away	different	left	right	position	switch	1	far	4	0	0	unknown	15	35	2	15	35	9	19.68	20
228351	Human	Human	male	602	Antje	female	2	8	1	TS	Towards	same	right	right	position	start	1	far	2	1	0	unknown	17	11	7	17	12	9	0	1.12
228351	Human	Human	male	602	Antje	female	2	8	1	TS	Towards	same	right	right	position	switch	2	far	2	1	0	unknown	17	12	10	17	12	19	1.12	1.52
228351	Human	Human	male	602	Antje	female	2	8	1	TS	Towards	same	right	right	position	turn	2	far	1	1	0	unknown	17	12	20	17	15	18	1.52	4.48
228351	Human	Human	male	602	Antje	female	2	8	1	TS	Towards	same	right	right	auditory	vocalization	2	far	1	1	4	unknown	17	14	0	17	14	9	2.72	3.12
228351	Human	Human	male	602	Antje	female	2	8	1	TS	Towards	same	right	right	position	switch	1	far	1	1	0	unknown	17	15	19	17	17	22	4.48	6.64
228351	Human	Human	male	602	Antje	female	2	8	1	TS	Towards	same	right	right	auditory	vocalization	1	far	1	1	4	unknown	17	15	19	17	16	6	4.48	5
228351	Human	Human	male	602	Antje	female	2	8	1	TS	Towards	same	right	right	position	approach	1	arm	1	1	0	unknown	17	17	23	17	18	6	6.64	7
228351	Human	Human	male	602	Antje	female	2	8	1	TS	Towards	same	right	right	visual	reach	1	arm	1	1	1	unknown	17	18	5	17	18	15	6.92	7.36
228351	Human	Human	male	602	Antje	female	2	8	1	TS	Towards	same	right	right	position	turn	1	arm	4	0	0	unknown	17	18	7	17	21	9	7	10.12
228351	Human	Human	male	602	Antje	female	2	8	1	TS	Towards	same	right	right	position	leave	1	far	4	0	0	unknown	17	21	10	17	31	6	10.12	20
228351	Human	Human	male	602	Antje	female	2	8	1	TS	Towards	same	right	right	action	touch	1	far	4	0	0	unknown	17	23	0	17	31	6	11.72	20	pling-machine
228831	Human	Human	male	602	Heinz	male	1	1	3	AS	Away	same	right	right	position	start	2	far	4	0	0	unknown	5	3	13	5	4	8	0	0.84
228831	Human	Human	male	602	Heinz	male	1	1	3	AS	Away	same	right	right	action	touch	2	far	4	0	0	unknown	5	3	13	5	23	12	0	20
228831	Human	Human	male	602	Heinz	male	1	1	3	AS	Away	same	right	right	position	turn	2	far	1	1	0	unknown	5	4	9	5	4	24	0.84	1.48
228831	Human	Human	male	602	Heinz	male	1	1	3	AS	Away	same	right	right	position	turn	2	far	2	1	0	unknown	5	5	0	5	6	21	1.48	3.36
228831	Human	Human	male	602	Heinz	male	1	1	3	AS	Away	same	right	right	position	turn	2	far	4	0	0	unknown	5	6	22	5	23	12	3.36	20
228831	Human	Human	male	602	Heinz	male	1	2	1	TS	Towards	same	left	left	position	start	1	far	1	1	0	unknown	6	56	1	7	2	13	0	6.52
228831	Human	Human	male	602	Heinz	male	1	2	1	TS	Towards	same	left	left	auditory	vocalization	1	far	1	1	4	unknown	6	58	20	6	59	1	2.76	3.04
228831	Human	Human	male	602	Heinz	male	1	2	1	TS	Towards	same	left	left	position	turn	1	far	4	0	0	unknown	7	2	14	7	16	0	6.52	20
228831	Human	Human	male	602	Heinz	male	1	2	1	TS	Towards	same	left	left	auditory	vocalization	1	far	4	0	4	unknown	7	4	24	7	5	4	8.92	9.16
228831	Human	Human	male	602	Heinz	male	1	2	1	TS	Towards	same	left	left	auditory	vocalization	1	far	4	0	4	unknown	7	5	14	7	5	21	9.52	9.84
228831	Human	Human	male	602	Heinz	male	1	3	4	AD	Away	different	right	left	position	start	2	far	4	0	0	unknown	8	49	12	8	52	3	0	2.68
228831	Human	Human	male	602	Heinz	male	1	3	4	AD	Away	different	right	left	auditory	vocalization	2	far	4	0	4	unknown	8	51	16	8	51	24	2.16	2.52	verbal (hoch?)
228831	Human	Human	male	602	Heinz	male	1	3	4	AD	Away	different	right	left	position	turn	2	far	2	1	0	unknown	8	52	4	8	53	10	2.68	3.96
228831	Human	Human	male	602	Heinz	male	1	3	4	AD	Away	different	right	left	position	turn	2	far	4	0	0	unknown	8	53	11	9	9	11	3.96	20
228831	Human	Human	male	602	Heinz	male	1	3	4	AD	Away	different	right	left	auditory	vocalization	2	far	4	0	4	unknown	8	54	8	8	54	17	4.84	5.24	verbal (hoch?)
228831	Human	Human	male	602	Heinz	male	1	3	4	AD	Away	different	right	left	auditory	vocalization	2	far	4	0	4	unknown	8	55	23	8	56	1	6.44	6.6
228831	Human	Human	male	602	Heinz	male	1	3	4	AD	Away	different	right	left	auditory	vocalization	2	far	4	0	4	unknown	8	56	22	8	57	5	7.4	7.76	verbal (hoch?)
228831	Human	Human	male	602	Heinz	male	1	3	4	AD	Away	different	right	left	auditory	vocalization	2	far	4	0	4	unknown	8	59	3	8	59	14	9.64	10.12
228831	Human	Human	male	602	Heinz	male	1	3	4	AD	Away	different	right	left	auditory	vocalization	2	far	4	0	4	unknown	9	0	3	9	0	10	10.64	10.96
228831	Human	Human	male	602	Heinz	male	1	3	4	AD	Away	different	right	left	auditory	vocalization	2	far	4	0	4	unknown	9	2	2	9	2	9	12.6	12.92	verbal (hoch?)
228831	Human	Human	male	602	Heinz	male	1	3	4	AD	Away	different	right	left	auditory	vocalization	2	far	4	0	4	unknown	9	4	9	9	4	11	14.88	15
228831	Human	Human	male	602	Heinz	male	1	3	4	AD	Away	different	right	left	auditory	vocalization	2	far	4	0	4	unknown	9	8	21	9	9	7	19.36	19.84
228831	Human	Human	male	602	Heinz	male	1	4	2	TD	Towards	different	left	right	position	start	2	far	1	1	0	unknown	10	51	1	10	53	9	0	2.36
228831	Human	Human	male	602	Heinz	male	1	4	2	TD	Towards	different	left	right	action	touch	2	far	1	1	0	unknown	10	51	1	10	54	2	0	3.08	pling-machine
228831	Human	Human	male	602	Heinz	male	1	4	2	TD	Towards	different	left	right	position	turn	2	far	2	1	0	unknown	10	53	10	10	53	18	2.36	2.72
228831	Human	Human	male	602	Heinz	male	1	4	2	TD	Towards	different	left	right	position	turn	2	far	4	0	0	unknown	10	53	19	10	55	18	2.72	4.72
228831	Human	Human	male	602	Heinz	male	1	4	2	TD	Towards	different	left	right	position	switch	1	far	4	0	0	unknown	10	55	19	10	56	0	4.72	5
228831	Human	Human	male	602	Heinz	male	1	4	2	TD	Towards	different	left	right	position	approach	1	close	4	0	0	unknown	10	56	1	10	56	22	5	5.88
228831	Human	Human	male	602	Heinz	male	1	4	2	TD	Towards	different	left	right	auditory	vocalization	1	close	4	0	4	unknown	10	56	6	10	56	11	5.2	5.44
228831	Human	Human	male	602	Heinz	male	1	4	2	TD	Towards	different	left	right	position	approach	1	arm	4	0	0	unknown	10	56	23	11	2	11	5.88	11.44
228831	Human	Human	male	602	Heinz	male	1	4	2	TD	Towards	different	left	right	auditory	bang	1	arm	4	0	1	unknown	11	0	20	11	5	2	9.76	14.08	6x
228831	Human	Human	male	602	Heinz	male	1	4	2	TD	Towards	different	left	right	position	turn	1	arm	1	1	0	unknown	11	2	12	11	6	18	11.44	15.72
228831	Human	Human	male	602	Heinz	male	1	4	2	TD	Towards	different	left	right	auditory	bang	1	arm	1	1	1	unknown	11	5	24	11	9	1	14.92	18.04	2x
228831	Human	Human	male	602	Heinz	male	1	4	2	TD	Towards	different	left	right	position	turn	1	arm	4	0	0	unknown	11	6	19	11	11	0	15.72	20
228831	Human	Human	male	602	Heinz	male	2	5	2	TD	Towards	different	right	left	position	start	2	far	1	1	0	unknown	12	57	8	12	57	20	0	0.52
228831	Human	Human	male	602	Heinz	male	2	5	2	TD	Towards	different	right	left	position	turn	2	far	4	0	0	unknown	12	57	21	13	17	7	0.52	20
228831	Human	Human	male	602	Heinz	male	2	5	2	TD	Towards	different	right	left	action	touch	2	far	4	0	0	unknown	12	58	15	13	7	11	1.28	10.16	pling-machine
228831	Human	Human	male	602	Heinz	male	2	5	2	TD	Towards	different	right	left	auditory	vocalization	2	far	4	0	4	unknown	12	58	20	12	59	18	1.48	2.44
228831	Human	Human	male	602	Heinz	male	2	5	2	TD	Towards	different	right	left	auditory	vocalization	2	far	4	0	4	unknown	13	0	18	13	1	8	3.4	4.04
228831	Human	Human	male	602	Heinz	male	2	5	2	TD	Towards	different	right	left	auditory	vocalization	2	far	4	0	4	unknown	13	2	7	13	3	7	4.96	6
228831	Human	Human	male	602	Heinz	male	2	5	2	TD	Towards	different	right	left	auditory	vocalization	2	far	4	0	4	unknown	13	3	20	13	4	3	6.48	6.84
228831	Human	Human	male	602	Heinz	male	2	5	2	TD	Towards	different	right	left	auditory	vocalization	2	far	4	0	4	unknown	13	6	14	13	7	13	9.24	10.24
228831	Human	Human	male	602	Heinz	male	2	5	2	TD	Towards	different	right	left	auditory	vocalization	2	far	4	0	4	unknown	13	11	18	13	12	4	14.4	14.88
228831	Human	Human	male	602	Heinz	male	2	5	2	TD	Towards	different	right	left	auditory	vocalization	2	far	4	0	4	unknown	13	14	0	13	15	23	16.68	18.64
228831	Human	Human	male	602	Heinz	male	2	5	2	TD	Towards	different	right	left	auditory	vocalization	2	far	4	0	4	unknown	13	16	16	13	17	7	19.32	20
229041	Human	Human	male	601	Heinz	male	1	1	4	AD	Away	different	left	right	position	start	1	close	4	0	0	unknown	8	15	2	8	15	12	0	0.44
229041	Human	Human	male	601	Heinz	male	1	1	4	AD	Away	different	left	right	position	turn	1	close	1	1	0	unknown	8	15	13	8	19	6	0.44	4.2
229041	Human	Human	male	601	Heinz	male	1	1	4	AD	Away	different	left	right	auditory	vocalization	1	close	1	1	4	unknown	8	17	22	8	19	1	2.8	4
229041	Human	Human	male	601	Heinz	male	1	1	4	AD	Away	different	left	right	position	approach	1	arm	1	1	0	unknown	8	19	7	8	35	1	4.2	20
229041	Human	Human	male	601	Heinz	male	1	1	4	AD	Away	different	left	right	action	touch	1	arm	1	1	0	unknown	8	20	23	8	23	17	5.84	8.64
229041	Human	Human	male	601	Heinz	male	1	2	2	TD	Towards	different	right	left	position	start	1	arm	1	1	0	unknown	10	54	0	10	57	11	0	3.48
229041	Human	Human	male	601	Heinz	male	1	2	2	TD	Towards	different	right	left	visual	point	1	arm	1	1	1	unknown	10	55	4	10	57	16	1.16	3.68
229041	Human	Human	male	601	Heinz	male	1	2	2	TD	Towards	different	right	left	position	turn	1	arm	4	0	0	unknown	10	57	12	10	59	21	3.48	5.88
229041	Human	Human	male	601	Heinz	male	1	2	2	TD	Towards	different	right	left	position	switch	2	close	4	0	0	unknown	10	59	22	11	0	12	5.88	6.52
229041	Human	Human	male	601	Heinz	male	1	2	2	TD	Towards	different	right	left	position	leave	2	far	4	0	0	unknown	11	0	13	11	8	5	6.52	14.24
229041	Human	Human	male	601	Heinz	male	1	2	2	TD	Towards	different	right	left	position	turn	2	far	1	1	0	unknown	11	8	6	11	9	20	14.24	15.84
229041	Human	Human	male	601	Heinz	male	1	2	2	TD	Towards	different	right	left	position	switch	1	far	1	1	0	unknown	11	9	21	11	10	10	15.84	16.44
229041	Human	Human	male	601	Heinz	male	1	2	2	TD	Towards	different	right	left	position	approach	1	close	1	1	0	unknown	11	10	11	11	11	2	16.44	17.12
229041	Human	Human	male	601	Heinz	male	1	2	2	TD	Towards	different	right	left	position	approach	1	arm	1	1	0	unknown	11	11	3	11	13	24	17.12	20
229041	Human	Human	male	601	Heinz	male	1	3	1	TS	Towards	same	left	left	position	start	1	close	1	1	0	unknown	13	37	1	13	40	11	0	3.44
229041	Human	Human	male	601	Heinz	male	1	3	1	TS	Towards	same	left	left	position	approach	1	arm	1	1	0	unknown	13	40	12	13	57	0	3.44	20
229041	Human	Human	male	601	Heinz	male	1	3	1	TS	Towards	same	left	left	visual	reach	1	arm	1	1	1	unknown	13	42	18	13	53	24	5.68	16.96
229041	Human	Human	male	601	Heinz	male	1	3	1	TS	Towards	same	left	left	auditory	vocalization	1	arm	1	1	4	unknown	13	44	11	13	44	21	7.4	7.84
229041	Human	Human	male	601	Heinz	male	1	3	1	TS	Towards	same	left	left	auditory	vocalization	1	arm	1	1	4	unknown	13	46	2	13	46	12	9.04	9.48
229041	Human	Human	male	601	Heinz	male	1	3	1	TS	Towards	same	left	left	visual	reach	1	arm	1	1	1	unknown	13	47	4	13	49	21	10.12	12.84
229041	Human	Human	male	601	Heinz	male	1	3	1	TS	Towards	same	left	left	auditory	vocalization	1	arm	1	1	4	unknown	13	49	8	13	49	15	12.28	12.6	verbal ref (da)
229041	Human	Human	male	601	Heinz	male	1	3	1	TS	Towards	same	left	left	auditory	vocalization	1	arm	1	1	4	unknown	13	50	4	13	50	11	13.12	13.44	verbal ref (da)
229041	Human	Human	male	601	Heinz	male	1	4	3	AS	Away	same	right	right	position	start	1	arm	1	1	0	unknown	15	40	19	15	49	22	0	9.16
229041	Human	Human	male	601	Heinz	male	1	4	3	AS	Away	same	right	right	position	turn	1	arm	4	0	0	unknown	15	49	23	16	0	18	9.16	20
229041	Human	Human	male	601	Heinz	male	1	4	3	AS	Away	same	right	right	auditory	vocalization	1	arm	4	0	4	unknown	15	50	14	15	51	8	9.8	10.6	verbal (mama)
229041	Human	Human	male	601	Heinz	male	2	5	3	AS	Away	same	left	left	position	start	1	close	1	1	0	unknown	17	48	14	17	49	0	0	0.48
229041	Human	Human	male	601	Heinz	male	2	5	3	AS	Away	same	left	left	position	turn	1	close	2	1	0	unknown	17	49	1	17	58	2	0.48	9.56
229041	Human	Human	male	601	Heinz	male	2	5	3	AS	Away	same	left	left	auditory	vocalization	1	close	2	1	4	unknown	17	57	9	17	57	19	8.8	9.24
229041	Human	Human	male	601	Heinz	male	2	5	3	AS	Away	same	left	left	position	turn	1	close	4	0	0	unknown	17	58	3	18	0	5	9.56	11.68
229041	Human	Human	male	601	Heinz	male	2	5	3	AS	Away	same	left	left	position	switch	2	close	4	0	0	unknown	18	0	6	18	1	7	11.68	12.76
229041	Human	Human	male	601	Heinz	male	2	5	3	AS	Away	same	left	left	position	leave	2	far	4	0	0	unknown	18	1	8	18	5	12	12.76	16.96
229041	Human	Human	male	601	Heinz	male	2	5	3	AS	Away	same	left	left	position	turn	2	far	1	1	0	unknown	18	5	13	18	7	21	16.96	19.32
229041	Human	Human	male	601	Heinz	male	2	5	3	AS	Away	same	left	left	position	approach	2	close	1	1	0	unknown	18	7	22	18	8	13	19.32	20
229041	Human	Human	male	601	Heinz	male	2	6	1	TS	Towards	same	right	right	position	start	1	far	1	1	0	unknown	19	39	16	19	42	5	0	2.6
229041	Human	Human	male	601	Heinz	male	2	6	1	TS	Towards	same	right	right	position	approach	1	arm	1	1	0	unknown	19	42	6	19	59	15	2.6	20
229041	Human	Human	male	601	Heinz	male	2	6	1	TS	Towards	same	right	right	visual	point	1	arm	1	1	1	unknown	19	43	13	19	44	5	3.88	4.6
229041	Human	Human	male	601	Heinz	male	2	6	1	TS	Towards	same	right	right	auditory	vocalization	1	arm	1	1	4	unknown	19	43	13	19	43	19	3.88	4.16	verbal ref (da)
229041	Human	Human	male	601	Heinz	male	2	6	1	TS	Towards	same	right	right	visual	reach	1	arm	1	1	1	unknown	19	44	19	19	47	14	5.12	7.96
229041	Human	Human	male	601	Heinz	male	2	6	1	TS	Towards	same	right	right	auditory	vocalization	1	arm	1	1	4	unknown	19	46	4	19	46	12	6.52	6.88	verbal ref (das)
229041	Human	Human	male	601	Heinz	male	2	6	1	TS	Towards	same	right	right	visual	reach	1	arm	1	1	1	unknown	19	54	2	19	56	4	14.44	16.56
229041	Human	Human	male	601	Heinz	male	2	7	2	TD	Towards	different	left	right	position	start	2	far	1	1	0	unknown	21	39	5	21	40	21	0	1.68
229041	Human	Human	male	601	Heinz	male	2	7	2	TD	Towards	different	left	right	position	switch	1	close	1	1	0	unknown	21	40	22	21	41	24	1.68	2.8
229041	Human	Human	male	601	Heinz	male	2	7	2	TD	Towards	different	left	right	visual	point	1	close	1	1	1	unknown	21	40	22	21	46	18	1.68	7.56
229041	Human	Human	male	601	Heinz	male	2	7	2	TD	Towards	different	left	right	auditory	vocalization	1	close	1	1	4	unknown	21	41	1	21	41	12	1.84	2.32	verbal ref (alle)
229041	Human	Human	male	601	Heinz	male	2	7	2	TD	Towards	different	left	right	position	approach	1	arm	1	1	0	unknown	21	42	0	21	42	17	2.8	3.52
229041	Human	Human	male	601	Heinz	male	2	7	2	TD	Towards	different	left	right	position	turn	1	arm	2	1	0	unknown	21	42	18	21	44	8	3.52	5.16
229041	Human	Human	male	601	Heinz	male	2	7	2	TD	Towards	different	left	right	position	turn	1	arm	1	1	0	unknown	21	44	9	21	50	8	5.16	11.16
229041	Human	Human	male	601	Heinz	male	2	7	2	TD	Towards	different	left	right	auditory	vocalization	1	arm	1	1	4	unknown	21	46	6	21	46	18	7.04	7.56	verbal ref (alle)
229041	Human	Human	male	601	Heinz	male	2	7	2	TD	Towards	different	left	right	position	switch	2	arm	2	1	0	unknown	21	50	9	21	54	19	11.16	15.6
229041	Human	Human	male	601	Heinz	male	2	7	2	TD	Towards	different	left	right	visual	point	2	arm	2	1	2	unknown	21	50	24	21	52	7	11.76	13.12
229041	Human	Human	male	601	Heinz	male	2	7	2	TD	Towards	different	left	right	auditory	vocalization	2	arm	2	1	4	unknown	21	52	9	21	52	15	13.16	13.44
229041	Human	Human	male	601	Heinz	male	2	7	2	TD	Towards	different	left	right	position	turn	2	arm	4	0	0	unknown	21	54	20	21	59	4	15.6	20
229041	Human	Human	male	601	Heinz	male	2	7	2	TD	Towards	different	left	right	visual	reach	2	arm	4	0	2	unknown	21	57	21	21	59	4	18.64	20	reach (right)
229041	Human	Human	male	601	Heinz	male	2	8	4	AD	Away	different	right	left	position	start	1	close	1	1	0	unknown	23	32	10	23	48	5	0	15.84
229041	Human	Human	male	601	Heinz	male	2	8	4	AD	Away	different	right	left	position	turn	1	close	4	0	0	unknown	23	48	6	23	50	9	15.84	18
229041	Human	Human	male	601	Heinz	male	2	8	4	AD	Away	different	right	left	position	leave	1	far	4	0	0	unknown	23	50	10	23	52	9	18	20
229041	Human	Human	male	601	Heinz	male	2	8	4	AD	Away	different	right	left	auditory	vocalization	1	far	4	0	4	unknown	23	51	17	23	52	9	19.28	20
236642	Human	Human	male	620	Heinz	male	1	1	4	AD	Away	different	right	left	position	start	1	arm	1	1	0	unknown	5	55	10	6	12	7	0	16.92
236642	Human	Human	male	620	Heinz	male	1	1	4	AD	Away	different	right	left	auditory	bang	1	arm	1	1	1	foot	6	8	3	6	9	16	12.72	14.28
236642	Human	Human	male	620	Heinz	male	1	1	4	AD	Away	different	right	left	position	turn	1	arm	2	1	0	unknown	6	12	8	6	14	16	16.92	19.28
236642	Human	Human	male	620	Heinz	male	1	1	4	AD	Away	different	right	left	position	switch	2	arm	2	1	0	unknown	6	14	17	6	15	9	19.28	20
236642	Human	Human	male	620	Heinz	male	1	2	3	AS	Away	same	right	right	position	start	1	arm	1	1	0	unknown	8	27	20	8	33	4	0	5.4
236642	Human	Human	male	620	Heinz	male	1	2	3	AS	Away	same	right	right	position	turn	1	arm	4	0	0	unknown	8	33	5	8	35	2	5.4	7.32
236642	Human	Human	male	620	Heinz	male	1	2	3	AS	Away	same	right	right	position	leave	1	far	4	0	0	unknown	8	35	3	8	42	0	7.32	14.24
236642	Human	Human	male	620	Heinz	male	1	2	3	AS	Away	same	right	right	auditory	vocalization	1	far	4	0	4	unknown	8	36	6	8	36	19	8.44	9
236642	Human	Human	male	620	Heinz	male	1	2	3	AS	Away	same	right	right	position	turn	1	far	1	1	0	unknown	8	42	1	8	44	20	14.24	17.04
236642	Human	Human	male	620	Heinz	male	1	2	3	AS	Away	same	right	right	position	approach	1	arm	1	1	0	unknown	8	44	21	8	46	0	17.04	18.24
236642	Human	Human	male	620	Heinz	male	1	2	3	AS	Away	same	right	right	visual	point	1	arm	1	1	1	unknown	8	45	11	8	46	13	17.64	18.76
236642	Human	Human	male	620	Heinz	male	1	2	3	AS	Away	same	right	right	position	turn	1	arm	4	0	0	unknown	8	46	1	8	47	19	18.24	20
236642	Human	Human	male	620	Heinz	male	1	3	2	TD	Towards	different	left	right	position	start	1	far	4	0	0	unknown	10	29	2	10	29	21	0	0.8
236642	Human	Human	male	620	Heinz	male	1	3	2	TD	Towards	different	left	right	auditory	vocalization	1	far	4	0	4	unknown	10	29	2	10	29	12	0	0.44
236642	Human	Human	male	620	Heinz	male	1	3	2	TD	Towards	different	left	right	position	turn	1	far	1	1	0	unknown	10	29	22	10	32	12	0.8	3.44
236642	Human	Human	male	620	Heinz	male	1	3	2	TD	Towards	different	left	right	position	approach	1	arm	1	1	0	unknown	10	32	13	10	46	15	3.44	17.56
236642	Human	Human	male	620	Heinz	male	1	3	2	TD	Towards	different	left	right	visual	reach	1	arm	1	1	1	unknown	10	32	18	10	33	5	3.64	4.16
236642	Human	Human	male	620	Heinz	male	1	3	2	TD	Towards	different	left	right	auditory	vocalization	1	arm	1	1	4	unknown	10	35	20	10	36	0	6.72	6.96
236642	Human	Human	male	620	Heinz	male	1	3	2	TD	Towards	different	left	right	auditory	vocalization	1	arm	1	1	4	unknown	10	37	7	10	37	10	8.2	8.36
236642	Human	Human	male	620	Heinz	male	1	3	2	TD	Towards	different	left	right	auditory	vocalization	1	arm	1	1	4	unknown	10	42	5	10	42	10	13.12	13.36
236642	Human	Human	male	620	Heinz	male	1	3	2	TD	Towards	different	left	right	auditory	vocalization	1	arm	1	1	4	unknown	10	46	3	10	46	12	17.04	17.44
236642	Human	Human	male	620	Heinz	male	1	3	2	TD	Towards	different	left	right	position	turn	1	arm	2	1	0	unknown	10	46	16	10	48	7	17.56	19.24
236642	Human	Human	male	620	Heinz	male	1	3	2	TD	Towards	different	left	right	position	switch	2	arm	2	1	0	unknown	10	48	8	10	49	1	19.24	20
236642	Human	Human	male	620	Heinz	male	1	4	1	TS	Towards	same	left	left	position	start	1	arm	1	1	0	unknown	12	50	0	12	53	4	0	3.2
236642	Human	Human	male	620	Heinz	male	1	4	1	TS	Towards	same	left	left	position	turn	1	arm	4	0	0	unknown	12	53	5	12	55	1	3.2	5.08
236642	Human	Human	male	620	Heinz	male	1	4	1	TS	Towards	same	left	left	visual	point	1	close	4	0	4	unknown	12	54	1	12	57	9	4.04	7.4	point (away); point to door
236642	Human	Human	male	620	Heinz	male	1	4	1	TS	Towards	same	left	left	auditory	vocalization	1	close	4	0	4	unknown	12	54	11	12	55	4	4.44	5.2	verbal (mama)
236642	Human	Human	male	620	Heinz	male	1	4	1	TS	Towards	same	left	left	position	switch	2	far	4	0	0	unknown	12	55	2	13	9	24	5.08	20
236642	Human	Human	male	620	Heinz	male	1	4	1	TS	Towards	same	left	left	auditory	vocalization	1	far	4	0	4	unknown	12	55	7	12	55	22	5.28	5.92	verbal (mama)
236642	Human	Human	male	620	Heinz	male	1	4	1	TS	Towards	same	left	left	auditory	vocalization	1	far	4	0	4	unknown	12	56	0	12	56	16	6	6.68	verbal (mama)
236642	Human	Human	male	620	Heinz	male	1	4	1	TS	Towards	same	left	left	auditory	vocalization	1	far	4	0	4	unknown	13	6	13	13	6	22	16.52	16.92
236642	Human	Human	male	620	Heinz	male	1	4	1	TS	Towards	same	left	left	auditory	bang	1	far	4	0	4	foot	13	7	6	13	7	14	17.24	17.6
236642	Human	Human	male	620	Heinz	male	2	5	1	TS	Towards	same	right	right	position	start	1	arm	1	1	0	unknown	14	42	0	14	43	23	0	1.96
236642	Human	Human	male	620	Heinz	male	2	5	1	TS	Towards	same	right	right	auditory	vocalization	1	arm	1	1	4	unknown	14	42	9	14	42	20	0.36	0.84
236642	Human	Human	male	620	Heinz	male	2	5	1	TS	Towards	same	right	right	position	turn	1	arm	2	1	0	unknown	14	43	24	14	45	16	1.96	3.68
236642	Human	Human	male	620	Heinz	male	2	5	1	TS	Towards	same	right	right	position	switch	2	arm	2	1	0	unknown	14	45	17	14	47	23	3.68	5.96
236642	Human	Human	male	620	Heinz	male	2	5	1	TS	Towards	same	right	right	auditory	vocalization	2	arm	2	1	4	unknown	14	47	7	14	48	1	5.28	6.08	verbal (hallo)
236642	Human	Human	male	620	Heinz	male	2	5	1	TS	Towards	same	right	right	position	turn	2	arm	1	1	0	unknown	14	47	24	14	51	13	5.96	9.56
236642	Human	Human	male	620	Heinz	male	2	5	1	TS	Towards	same	right	right	auditory	vocalization	2	arm	1	1	4	unknown	14	49	1	14	49	16	7.04	7.68
236642	Human	Human	male	620	Heinz	male	2	5	1	TS	Towards	same	right	right	auditory	vocalization	2	arm	1	1	4	unknown	14	51	12	14	52	2	9.48	10.12
236642	Human	Human	male	620	Heinz	male	2	5	1	TS	Towards	same	right	right	position	switch	1	arm	1	1	0	unknown	14	51	14	14	55	13	9.56	13.56
236642	Human	Human	male	620	Heinz	male	2	5	1	TS	Towards	same	right	right	auditory	vocalization	1	arm	1	1	4	unknown	14	53	16	14	53	24	11.64	12
236642	Human	Human	male	620	Heinz	male	2	5	1	TS	Towards	same	right	right	position	turn	1	arm	2	1	0	unknown	14	55	14	14	56	9	13.56	14.4
236642	Human	Human	male	620	Heinz	male	2	5	1	TS	Towards	same	right	right	position	turn	1	arm	1	1	0	unknown	14	56	10	15	1	24	14.4	20
236642	Human	Human	male	620	Heinz	male	2	5	1	TS	Towards	same	right	right	auditory	vocalization	1	arm	1	1	4	unknown	14	57	11	14	57	18	15.44	15.76
236642	Human	Human	male	620	Heinz	male	2	5	1	TS	Towards	same	right	right	auditory	vocalization	1	arm	1	1	4	unknown	14	59	3	14	59	21	17.12	17.88
236642	Human	Human	male	620	Heinz	male	2	5	1	TS	Towards	same	right	right	auditory	vocalization	1	arm	1	1	4	unknown	15	0	18	15	1	2	18.72	19.12
236642	Human	Human	male	620	Heinz	male	2	5	1	TS	Towards	same	right	right	visual	reach	1	arm	1	1	1	unknown	15	0	24	15	1	24	18.96	20
236642	Human	Human	male	620	Heinz	male	2	6	2	TD	Towards	different	right	left	position	start	1	arm	1	1	0	unknown	16	35	16	16	40	0	0	4.4
236642	Human	Human	male	620	Heinz	male	2	6	2	TD	Towards	different	right	left	auditory	vocalization	1	arm	1	1	4	unknown	16	36	9	16	36	16	0.72	1.04
236642	Human	Human	male	620	Heinz	male	2	6	2	TD	Towards	different	right	left	visual	point	1	arm	1	1	4	unknown	16	38	23	16	40	20	3.28	5.2	point (away)
236642	Human	Human	male	620	Heinz	male	2	6	2	TD	Towards	different	right	left	auditory	vocalization	1	arm	1	1	4	unknown	16	39	6	16	39	19	3.6	4.16	verbal (mama)
236642	Human	Human	male	620	Heinz	male	2	6	2	TD	Towards	different	right	left	position	turn	1	arm	4	0	0	unknown	16	40	1	16	41	14	4.4	5.96
236642	Human	Human	male	620	Heinz	male	2	6	2	TD	Towards	different	right	left	position	leave	1	far	4	0	0	unknown	16	41	15	16	42	20	5.96	7.2
236642	Human	Human	male	620	Heinz	male	2	6	2	TD	Towards	different	right	left	visual	raise arm	1	far	4	0	4	unknown	16	41	15	16	42	22	5.96	7.28
236642	Human	Human	male	620	Heinz	male	2	6	2	TD	Towards	different	right	left	position	switch	2	far	4	0	0	unknown	16	42	21	16	55	15	7.2	20
236642	Human	Human	male	620	Heinz	male	2	6	2	TD	Towards	different	right	left	auditory	vocalization	2	far	4	0	4	unknown	16	42	21	16	43	13	7.2	7.92
236642	Human	Human	male	620	Heinz	male	2	6	2	TD	Towards	different	right	left	auditory	vocalization	2	far	4	0	4	unknown	16	47	24	16	48	4	12.32	12.56
236642	Human	Human	male	620	Heinz	male	2	6	2	TD	Towards	different	right	left	auditory	vocalization	2	far	4	0	4	unknown	16	51	22	16	52	18	16.24	17.12
236642	Human	Human	male	620	Heinz	male	2	6	2	TD	Towards	different	right	left	auditory	vocalization	2	far	4	0	4	unknown	16	54	8	16	54	20	18.68	19.2
236642	Human	Human	male	620	Heinz	male	2	7	3	AS	Away	same	left	left	position	start	1	far	1	1	0	unknown	19	3	24	19	4	3	0	0.2
236642	Human	Human	male	620	Heinz	male	2	7	3	AS	Away	same	left	left	position	turn	1	far	4	0	0	unknown	19	4	4	19	23	23	0.2	20
236642	Human	Human	male	620	Heinz	male	2	7	3	AS	Away	same	left	left	auditory	vocalization	1	far	4	0	4	unknown	19	6	1	19	6	10	2.08	2.48
236642	Human	Human	male	620	Heinz	male	2	7	3	AS	Away	same	left	left	auditory	vocalization	1	far	4	0	4	unknown	19	9	1	19	10	12	5.08	6.56
236642	Human	Human	male	620	Heinz	male	2	7	3	AS	Away	same	left	left	auditory	vocalization	1	far	4	0	4	unknown	19	11	11	19	11	23	7.48	8
236642	Human	Human	male	620	Heinz	male	2	7	3	AS	Away	same	left	left	auditory	vocalization	1	far	4	0	4	unknown	19	14	24	19	16	3	11	12.2
236642	Human	Human	male	620	Heinz	male	2	7	3	AS	Away	same	left	left	auditory	vocalization	1	far	4	0	4	unknown	19	23	22	19	23	23	19.92	20
226991	Human	Human	female	594	Antje	female	1	1	1	TS	Towards	same	right	right	position	start	1	arm	1	1	0	unknown	5	20	21	5	31	1	0	10.24
226991	Human	Human	female	594	Antje	female	1	1	1	TS	Towards	same	right	right	position	turn	1	arm	4	0	0	unknown	5	31	2	5	32	16	10.24	11.84
226991	Human	Human	female	594	Antje	female	1	1	1	TS	Towards	same	right	right	position	leave	1	close	4	0	0	unknown	5	32	17	5	33	6	11.84	12.44
226991	Human	Human	female	594	Antje	female	1	1	1	TS	Towards	same	right	right	position	switch	2	far	4	0	0	unknown	5	33	7	5	37	5	12.44	16.4
226991	Human	Human	female	594	Antje	female	1	1	1	TS	Towards	same	right	right	position	turn	2	far	1	1	0	unknown	5	37	6	5	39	0	16.4	18.2
226991	Human	Human	female	594	Antje	female	1	1	1	TS	Towards	same	right	right	position	switch	1	close	1	1	0	unknown	5	39	1	5	39	15	18.2	18.8
226991	Human	Human	female	594	Antje	female	1	1	1	TS	Towards	same	right	right	position	approach	1	arm	1	1	0	unknown	5	39	16	5	40	20	18.8	20
226991	Human	Human	female	594	Antje	female	1	2	2	TD	Towards	different	right	left	position	start	2	arm	2	1	0	unknown	7	34	10	7	34	17	0	0.32
226991	Human	Human	female	594	Antje	female	1	2	2	TD	Towards	different	right	left	position	turn	2	arm	4	0	0	unknown	7	34	18	7	35	24	0.32	1.6
226991	Human	Human	female	594	Antje	female	1	2	2	TD	Towards	different	right	left	position	turn	2	arm	2	1	0	unknown	7	36	0	7	38	0	1.6	3.64
226991	Human	Human	female	594	Antje	female	1	2	2	TD	Towards	different	right	left	position	turn	2	arm	4	0	0	unknown	7	38	1	7	38	13	3.64	4.16
226991	Human	Human	female	594	Antje	female	1	2	2	TD	Towards	different	right	left	position	turn	2	close	4	0	0	unknown	7	38	14	7	39	2	4.16	4.72
226991	Human	Human	female	594	Antje	female	1	2	2	TD	Towards	different	right	left	position	turn	2	far	4	0	0	unknown	7	39	3	7	44	13	4.72	10.16
226991	Human	Human	female	594	Antje	female	1	2	2	TD	Towards	different	right	left	position	turn	2	far	2	1	0	unknown	7	44	14	7	45	10	10.16	11.04
226991	Human	Human	female	594	Antje	female	1	2	2	TD	Towards	different	right	left	position	turn	2	far	4	0	0	unknown	7	45	11	7	49	7	11.04	14.92
226991	Human	Human	female	594	Antje	female	1	2	2	TD	Towards	different	right	left	position	turn	2	far	1	1	0	unknown	7	49	8	7	51	5	14.92	16.84
226991	Human	Human	female	594	Antje	female	1	2	2	TD	Towards	different	right	left	auditory	vocalization	2	far	1	1	4	unknown	7	50	15	7	51	5	16.2	16.84
226991	Human	Human	female	594	Antje	female	1	2	2	TD	Towards	different	right	left	position	turn	2	far	2	1	0	unknown	7	51	6	7	53	2	16.84	18.72
226991	Human	Human	female	594	Antje	female	1	2	2	TD	Towards	different	right	left	position	turn	2	far	4	0	0	unknown	7	53	3	7	54	9	18.72	20
226991	Human	Human	female	594	Antje	female	1	3	4	AD	Away	different	left	right	position	start	2	far	4	0	0	unknown	9	39	17	9	41	18	0	2.08
226991	Human	Human	female	594	Antje	female	1	3	4	AD	Away	different	left	right	position	turn	2	far	1	1	0	unknown	9	41	19	9	46	23	2.08	7.28
226991	Human	Human	female	594	Antje	female	1	3	4	AD	Away	different	left	right	position	turn	2	far	4	0	0	unknown	9	46	24	9	50	19	7.28	11.12
226991	Human	Human	female	594	Antje	female	1	3	4	AD	Away	different	left	right	position	turn	2	far	1	1	0	unknown	9	50	20	9	51	20	11.12	12.16
226991	Human	Human	female	594	Antje	female	1	3	4	AD	Away	different	left	right	position	approach	2	close	1	1	0	unknown	9	51	21	9	52	11	12.16	12.8
226991	Human	Human	female	594	Antje	female	1	3	4	AD	Away	different	left	right	position	switch	1	close	1	1	0	unknown	9	52	12	9	59	0	12.8	19.36
226991	Human	Human	female	594	Antje	female	1	3	4	AD	Away	different	left	right	position	turn	1	close	4	0	0	unknown	9	59	1	9	59	16	19.36	20
226991	Human	Human	female	594	Antje	female	1	4	3	AS	Away	same	left	left	position	start	1	arm	1	1	0	unknown	17	8	9	17	12	20	0	4.48
226991	Human	Human	female	594	Antje	female	1	4	3	AS	Away	same	left	left	position	turn	1	arm	4	0	0	unknown	17	12	21	17	13	13	4.48	5.2
226991	Human	Human	female	594	Antje	female	1	4	3	AS	Away	same	left	left	position	leave	1	close	4	0	0	unknown	17	13	14	17	14	12	5.2	6.16
226991	Human	Human	female	594	Antje	female	1	4	3	AS	Away	same	left	left	position	leave	1	far	4	0	0	unknown	17	14	13	17	21	3	6.16	12.8
226991	Human	Human	female	594	Antje	female	1	4	3	AS	Away	same	left	left	position	switch	2	far	4	0	0	unknown	17	21	4	17	28	8	12.8	20
226991	Human	Human	female	594	Antje	female	2	5	3	AS	Away	same	right	right	position	start	1	arm	1	1	0	unknown	19	5	2	19	17	7	0	12.24
226991	Human	Human	female	594	Antje	female	2	5	3	AS	Away	same	right	right	auditory	vocalization	1	arm	1	1	4	unknown	19	13	19	19	14	20	8.68	9.76
226991	Human	Human	female	594	Antje	female	2	5	3	AS	Away	same	right	right	position	turn	1	arm	4	0	0	unknown	19	17	8	19	18	12	12.24	13.44
226991	Human	Human	female	594	Antje	female	2	5	3	AS	Away	same	right	right	position	leave	1	close	4	0	0	unknown	19	18	13	19	19	9	13.44	14.32
226991	Human	Human	female	594	Antje	female	2	5	3	AS	Away	same	right	right	position	leave	1	far	4	0	0	unknown	19	19	10	19	25	1	14.32	20	pling-machine
226991	Human	Human	female	594	Antje	female	2	6	4	AD	Away	different	right	left	position	start	2	far	4	0	0	unknown	21	18	13	21	34	7	0	15.8
226991	Human	Human	female	594	Antje	female	2	6	4	AD	Away	different	right	left	position	turn	2	far	1	1	0	unknown	21	34	8	21	35	0	15.8	16.52
226991	Human	Human	female	594	Antje	female	2	6	4	AD	Away	different	right	left	auditory	vocalization	2	far	1	1	4	unknown	21	34	8	21	35	1	15.8	16.56
226991	Human	Human	female	594	Antje	female	2	6	4	AD	Away	different	right	left	position	turn	2	far	4	0	0	unknown	21	35	1	21	36	23	16.52	18.44
226991	Human	Human	female	594	Antje	female	2	6	4	AD	Away	different	right	left	position	switch	1	far	4	0	0	unknown	21	36	24	21	38	12	18.44	20
226991	Human	Human	female	594	Antje	female	2	7	2	TD	Towards	different	left	right	position	start	2	far	1	1	0	unknown	23	17	14	23	18	10	0	0.88
226991	Human	Human	female	594	Antje	female	2	7	2	TD	Towards	different	left	right	position	turn	2	far	4	0	0	unknown	23	18	11	23	19	8	0.88	1.8
226991	Human	Human	female	594	Antje	female	2	7	2	TD	Towards	different	left	right	position	turn	2	far	1	1	0	unknown	23	19	9	23	21	21	1.8	4.32
226991	Human	Human	female	594	Antje	female	2	7	2	TD	Towards	different	left	right	position	turn	2	far	4	0	0	unknown	23	21	22	23	24	15	4.32	7.08
226991	Human	Human	female	594	Antje	female	2	7	2	TD	Towards	different	left	right	position	turn	2	far	1	1	0	unknown	23	24	16	23	26	23	7.08	9.4
226991	Human	Human	female	594	Antje	female	2	7	2	TD	Towards	different	left	right	position	turn	2	far	4	0	0	unknown	23	26	24	23	29	5	9.4	11.68
226991	Human	Human	female	594	Antje	female	2	7	2	TD	Towards	different	left	right	position	turn	2	far	1	1	0	unknown	23	29	6	23	31	3	11.68	13.6
226991	Human	Human	female	594	Antje	female	2	7	2	TD	Towards	different	left	right	position	turn	2	far	4	0	0	unknown	23	31	4	23	37	13	13.6	20
226991	Human	Human	female	594	Antje	female	2	8	1	TS	Towards	same	left	left	position	start	2	far	1	1	0	unknown	25	8	17	25	12	3	0	3.48
226991	Human	Human	female	594	Antje	female	2	8	1	TS	Towards	same	left	left	position	turn	2	far	4	0	0	unknown	25	12	4	25	16	5	3.48	7.56
226991	Human	Human	female	594	Antje	female	2	8	1	TS	Towards	same	left	left	position	turn	2	far	1	1	0	unknown	25	16	6	25	18	14	7.56	9.92
226991	Human	Human	female	594	Antje	female	2	8	1	TS	Towards	same	left	left	position	turn	2	far	4	0	0	unknown	25	18	15	25	28	13	9.92	19.88
226991	Human	Human	female	594	Antje	female	2	8	1	TS	Towards	same	left	left	position	turn	2	far	1	1	0	unknown	25	28	14	25	28	16	19.88	20
226791	Human	Human	female	611	Astrid	female	1	1	2	TD	Towards	different	right	left	position	start	1	far	4	0	0	unknown	5	3	15	5	5	9	0	1.8
226791	Human	Human	female	611	Astrid	female	1	1	2	TD	Towards	different	right	left	position	switch	2	far	4	0	0	unknown	5	5	10	5	13	24	1.8	10.4
226791	Human	Human	female	611	Astrid	female	1	1	2	TD	Towards	different	right	left	action	touch	2	far	4	0	0	unknown	5	7	19	5	10	18	4.16	7.16	pling-machine
226791	Human	Human	female	611	Astrid	female	1	1	2	TD	Towards	different	right	left	auditory	vocalization	2	far	4	0	4	unknown	5	8	14	5	8	24	4.96	5.4
226791	Human	Human	female	611	Astrid	female	1	1	2	TD	Towards	different	right	left	action	touch	2	far	4	0	0	unknown	5	12	9	5	14	0	8.76	10.44	pling-machine
226791	Human	Human	female	611	Astrid	female	1	1	2	TD	Towards	different	right	left	position	turn	2	far	1	1	0	unknown	5	14	0	5	16	5	10.4	12.64
226791	Human	Human	female	611	Astrid	female	1	1	2	TD	Towards	different	right	left	position	turn	2	far	4	0	0	unknown	5	16	6	5	23	14	12.64	20
226791	Human	Human	female	611	Astrid	female	1	1	2	TD	Towards	different	right	left	visual	point	2	far	4	0	4	unknown	5	17	20	5	18	4	14.2	14.6	point (away); point to E2 & pling-machine
226791	Human	Human	female	611	Astrid	female	1	1	2	TD	Towards	different	right	left	auditory	vocalization	2	far	4	0	4	unknown	5	17	23	5	18	7	14.32	14.72
226791	Human	Human	female	611	Astrid	female	1	2	4	AD	Away	different	left	right	position	start	2	far	1	1	0	unknown	7	6	0	7	8	24	0	3
226791	Human	Human	female	611	Astrid	female	1	2	4	AD	Away	different	left	right	position	switch	1	far	1	1	0	unknown	7	9	0	7	9	21	3	3.88
226791	Human	Human	female	611	Astrid	female	1	2	4	AD	Away	different	left	right	position	approach	1	arm	1	1	0	unknown	7	9	22	7	18	7	3.88	12.32
226791	Human	Human	female	611	Astrid	female	1	2	4	AD	Away	different	left	right	visual	reach	1	arm	1	1	1	unknown	7	11	12	7	12	5	5.48	6.24
226791	Human	Human	female	611	Astrid	female	1	2	4	AD	Away	different	left	right	auditory	bang	1	arm	1	1	1	unknown	7	13	0	7	13	13	7	7.56
226791	Human	Human	female	611	Astrid	female	1	2	4	AD	Away	different	left	right	auditory	bang	1	arm	1	1	1	unknown	7	13	14	7	13	19	7.56	7.8
226791	Human	Human	female	611	Astrid	female	1	2	4	AD	Away	different	left	right	position	turn	1	arm	4	0	0	unknown	7	18	8	7	21	17	12.32	15.72
226791	Human	Human	female	611	Astrid	female	1	2	4	AD	Away	different	left	right	position	leave	1	far	4	0	0	unknown	7	21	18	7	25	24	15.72	20
226791	Human	Human	female	611	Astrid	female	1	2	4	AD	Away	different	left	right	auditory	vocalization	1	far	4	0	4	unknown	7	24	2	7	24	19	18.08	18.8
226791	Human	Human	female	611	Astrid	female	1	3	3	AS	Away	same	right	right	position	start	1	arm	1	1	0	unknown	9	13	24	9	19	2	0	5.16
226791	Human	Human	female	611	Astrid	female	1	3	3	AS	Away	same	right	right	position	turn	1	arm	4	0	0	unknown	9	19	3	9	27	10	5.16	13.48
226791	Human	Human	female	611	Astrid	female	1	3	3	AS	Away	same	right	right	visual	point	1	arm	4	0	1	unknown	9	19	3	9	24	5	5.16	10.28
226791	Human	Human	female	611	Astrid	female	1	3	3	AS	Away	same	right	right	position	turn	1	close	1	1	0	unknown	9	27	11	9	31	9	13.48	17.44
226791	Human	Human	female	611	Astrid	female	1	3	3	AS	Away	same	right	right	position	approach	1	arm	1	1	0	unknown	9	31	10	9	33	23	17.44	20
226791	Human	Human	female	611	Astrid	female	1	4	1	TS	Towards	same	left	left	position	start	2	close	4	0	0	unknown	12	44	12	12	46	24	0	2.52
226791	Human	Human	female	611	Astrid	female	1	4	1	TS	Towards	same	left	left	position	switch	1	far	4	0	0	unknown	12	47	0	13	0	7	2.52	15.84
226791	Human	Human	female	611	Astrid	female	1	4	1	TS	Towards	same	left	left	position	turn	1	far	1	1	0	unknown	13	0	8	13	2	13	15.84	18.08
226791	Human	Human	female	611	Astrid	female	1	4	1	TS	Towards	same	left	left	position	turn	1	far	4	0	0	unknown	13	2	14	13	4	11	18.08	20
226761	Human	Human	female	616	Heinz	male	1	1	1	TS	Towards	same	left	left	position	start	1	far	1	1	0	unknown	7	7	18	7	9	18	0	2.04
226761	Human	Human	female	616	Heinz	male	1	1	1	TS	Towards	same	left	left	action	touch	1	far	1	1	0	unknown	7	7	18	7	10	15	0	2.92	pling-machine
226761	Human	Human	female	616	Heinz	male	1	1	1	TS	Towards	same	left	left	position	turn	1	far	4	0	0	unknown	7	9	19	7	16	7	2.04	8.6
226761	Human	Human	female	616	Heinz	male	1	1	1	TS	Towards	same	left	left	auditory	vocalization	1	far	4	0	4	unknown	7	10	12	7	11	0	2.76	3.32
226761	Human	Human	female	616	Heinz	male	1	1	1	TS	Towards	same	left	left	action	touch	1	far	4	0	0	unknown	7	11	17	7	23	16	3.96	15.96	pling-machine
226761	Human	Human	female	616	Heinz	male	1	1	1	TS	Towards	same	left	left	auditory	vocalization	1	far	4	0	4	unknown	7	12	11	7	12	21	4.72	5.16
226761	Human	Human	female	616	Heinz	male	1	1	1	TS	Towards	same	left	left	auditory	vocalization	1	far	4	0	4	unknown	7	15	2	7	15	11	7.36	7.76
226761	Human	Human	female	616	Heinz	male	1	1	1	TS	Towards	same	left	left	position	turn	1	far	1	1	0	unknown	7	16	8	7	21	10	8.6	13.72
226761	Human	Human	female	616	Heinz	male	1	1	1	TS	Towards	same	left	left	position	turn	1	far	4	0	0	unknown	7	21	11	7	27	17	13.72	20
226761	Human	Human	female	616	Heinz	male	1	1	1	TS	Towards	same	left	left	auditory	vocalization	1	far	4	0	4	unknown	7	23	4	7	23	18	15.44	16.04
226761	Human	Human	female	616	Heinz	male	1	1	1	TS	Towards	same	left	left	auditory	vocalization	1	far	4	0	4	unknown	7	24	9	7	24	17	16.64	17
226761	Human	Human	female	616	Heinz	male	1	1	1	TS	Towards	same	left	left	action	touch	1	far	4	0	0	unknown	7	24	9	7	27	17	16.64	20	pling-machine
226761	Human	Human	female	616	Heinz	male	1	1	1	TS	Towards	same	left	left	auditory	vocalization	1	far	4	0	4	unknown	7	25	9	7	25	18	17.64	18.04
226761	Human	Human	female	616	Heinz	male	1	2	4	AD	Away	different	left	right	position	start	1	far	1	1	0	unknown	9	31	10	9	35	8	0	3.96
226761	Human	Human	female	616	Heinz	male	1	2	4	AD	Away	different	left	right	auditory	vocalization	1	far	1	1	4	unknown	9	34	11	9	35	5	3.04	3.84
226761	Human	Human	female	616	Heinz	male	1	2	4	AD	Away	different	left	right	visual	point	1	far	1	1	1	unknown	9	35	0	9	36	9	3.6	5
226761	Human	Human	female	616	Heinz	male	1	2	4	AD	Away	different	left	right	position	approach	1	close	1	1	0	unknown	9	35	9	9	36	10	3.96	5.04
226761	Human	Human	female	616	Heinz	male	1	2	4	AD	Away	different	left	right	position	turn	1	close	4	0	0	unknown	9	36	11	9	38	11	5.04	7.08
226761	Human	Human	female	616	Heinz	male	1	2	4	AD	Away	different	left	right	auditory	vocalization	1	close	4	0	4	unknown	9	36	14	9	37	0	5.16	5.64
226761	Human	Human	female	616	Heinz	male	1	2	4	AD	Away	different	left	right	position	turn	1	close	2	1	0	unknown	9	38	12	9	39	22	7.08	8.52
226761	Human	Human	female	616	Heinz	male	1	2	4	AD	Away	different	left	right	visual	point	1	close	2	1	1	unknown	9	38	24	9	40	17	7.56	9.32
226761	Human	Human	female	616	Heinz	male	1	2	4	AD	Away	different	left	right	auditory	vocalization	1	close	2	1	4	unknown	9	39	0	9	39	6	7.6	7.88
226761	Human	Human	female	616	Heinz	male	1	2	4	AD	Away	different	left	right	position	switch	2	close	2	1	0	unknown	9	39	23	9	40	13	8.52	9.16
226761	Human	Human	female	616	Heinz	male	1	2	4	AD	Away	different	left	right	auditory	vocalization	2	close	2	1	4	unknown	9	40	8	9	41	2	8.92	9.72
226761	Human	Human	female	616	Heinz	male	1	2	4	AD	Away	different	left	right	visual	point	2	close	2	1	2	unknown	9	40	10	9	43	23	9	12.56
226761	Human	Human	female	616	Heinz	male	1	2	4	AD	Away	different	left	right	position	approach	2	arm	2	1	0	unknown	9	40	14	9	41	8	9.16	9.96
226761	Human	Human	female	616	Heinz	male	1	2	4	AD	Away	different	left	right	position	turn	2	arm	4	0	0	unknown	9	41	9	9	45	15	9.96	14.24
226761	Human	Human	female	616	Heinz	male	1	2	4	AD	Away	different	left	right	auditory	vocalization	2	arm	4	0	4	unknown	9	42	4	9	42	16	10.76	11.28
226761	Human	Human	female	616	Heinz	male	1	2	4	AD	Away	different	left	right	position	switch	1	far	4	0	0	unknown	9	45	16	9	51	9	14.24	20
226761	Human	Human	female	616	Heinz	male	1	2	4	AD	Away	different	left	right	action	touch	1	far	4	0	0	unknown	9	47	4	9	51	9	15.76	20	pling-machine
226761	Human	Human	female	616	Heinz	male	1	2	4	AD	Away	different	left	right	auditory	vocalization	1	far	4	0	4	unknown	9	47	4	9	47	19	15.76	16.4
226761	Human	Human	female	616	Heinz	male	1	2	4	AD	Away	different	left	right	auditory	vocalization	1	far	4	0	4	unknown	9	50	2	9	50	9	18.68	19
226761	Human	Human	female	616	Heinz	male	1	2	4	AD	Away	different	left	right	auditory	vocalization	1	far	4	0	4	unknown	9	51	8	9	51	9	19.92	20
226761	Human	Human	female	616	Heinz	male	1	3	3	AS	Away	same	right	right	position	start	1	far	1	1	0	unknown	11	40	16	11	50	18	0	10.12
226761	Human	Human	female	616	Heinz	male	1	3	3	AS	Away	same	right	right	position	turn	1	far	4	0	0	unknown	11	50	19	11	54	5	10.12	13.6
226761	Human	Human	female	616	Heinz	male	1	3	3	AS	Away	same	right	right	auditory	vocalization	1	far	4	0	4	unknown	11	53	1	11	53	9	12.4	12.76
226761	Human	Human	female	616	Heinz	male	1	3	3	AS	Away	same	right	right	position	switch	2	far	4	0	0	unknown	11	54	6	12	0	15	13.6	20
226761	Human	Human	female	616	Heinz	male	1	3	3	AS	Away	same	right	right	action	touch	2	far	4	0	0	unknown	11	57	10	11	58	8	16.76	17.72	pling-machine
226761	Human	Human	female	616	Heinz	male	1	3	3	AS	Away	same	right	right	auditory	vocalization	2	far	4	0	4	unknown	11	58	9	11	59	3	17.72	18.52
226761	Human	Human	female	616	Heinz	male	1	3	3	AS	Away	same	right	right	auditory	vocalization	2	far	4	0	4	unknown	12	0	4	12	0	15	19.52	20
226761	Human	Human	female	616	Heinz	male	1	4	2	TD	Towards	different	right	left	position	start	2	far	1	1	0	unknown	14	9	22	14	17	0	0	7.16
226761	Human	Human	female	616	Heinz	male	1	4	2	TD	Towards	different	right	left	position	turn	2	far	4	0	0	unknown	14	17	1	14	29	21	7.16	20
226761	Human	Human	female	616	Heinz	male	1	4	2	TD	Towards	different	right	left	auditory	vocalization	2	far	4	0	4	unknown	14	23	14	14	24	9	13.68	14.52
226761	Human	Human	female	616	Heinz	male	1	4	2	TD	Towards	different	right	left	action	touch	2	far	4	0	0	unknown	14	23	22	14	25	19	14	15.92	pling-machine
226761	Human	Human	female	616	Heinz	male	1	4	2	TD	Towards	different	right	left	auditory	vocalization	2	far	4	0	4	unknown	14	25	18	14	26	20	15.84	16.96
226761	Human	Human	female	616	Heinz	male	1	4	2	TD	Towards	different	right	left	auditory	vocalization	2	far	4	0	4	unknown	14	29	15	14	29	21	19.72	20
225971	Human	Human	male	595	Astrid	female	1	1	3	AS	Away	same	right	right	position	start	1	arm	1	1	0	unknown	5	36	24	5	56	23	0	20
225971	Human	Human	male	595	Astrid	female	1	2	2	TD	Towards	different	left	right	position	start	2	far	1	1	0	unknown	7	22	22	7	23	18	0	0.88
225971	Human	Human	male	595	Astrid	female	1	2	2	TD	Towards	different	left	right	position	switch	1	far	1	1	0	unknown	7	23	19	7	24	8	0.88	1.48
225971	Human	Human	male	595	Astrid	female	1	2	2	TD	Towards	different	left	right	position	approach	1	close	1	1	0	unknown	7	24	9	7	25	18	1.48	2.88
225971	Human	Human	male	595	Astrid	female	1	2	2	TD	Towards	different	left	right	position	approach	1	arm	1	1	0	unknown	7	25	19	7	42	21	2.88	20
225971	Human	Human	male	595	Astrid	female	1	2	2	TD	Towards	different	left	right	visual	reach	1	arm	1	1	1	unknown	7	26	23	7	27	8	4.04	4.48
225971	Human	Human	male	595	Astrid	female	1	3	1	TS	Towards	same	left	left	position	start	1	arm	1	1	0	unknown	9	32	1	9	52	0	0	20
225971	Human	Human	male	595	Astrid	female	1	3	1	TS	Towards	same	left	left	visual	point	1	arm	1	1	1	unknown	9	32	3	9	33	23	0.08	1.92
225971	Human	Human	male	595	Astrid	female	1	3	1	TS	Towards	same	left	left	visual	point	1	arm	1	1	1	unknown	9	37	17	9	38	14	5.64	6.56
225971	Human	Human	male	595	Astrid	female	1	4	4	AD	Away	different	right	left	position	start	2	far	1	1	0	unknown	11	45	14	11	52	16	0	7.12
225971	Human	Human	male	595	Astrid	female	1	4	4	AD	Away	different	right	left	position	turn	2	far	4	0	0	unknown	11	52	17	11	54	23	7.12	9.4
225971	Human	Human	male	595	Astrid	female	1	4	4	AD	Away	different	right	left	position	turn	2	far	1	1	0	unknown	11	54	24	11	56	4	9.4	10.64
225971	Human	Human	male	595	Astrid	female	1	4	4	AD	Away	different	right	left	position	turn	2	far	4	0	0	unknown	11	56	5	12	5	13	10.64	20
225971	Human	Human	male	595	Astrid	female	2	5	4	AD	Away	different	left	right	position	start	1	far	1	1	0	unknown	14	7	16	14	12	2	0	4.48
225971	Human	Human	male	595	Astrid	female	2	5	4	AD	Away	different	left	right	position	turn	1	far	4	0	0	unknown	14	12	3	14	15	15	4.48	8
225971	Human	Human	male	595	Astrid	female	2	5	4	AD	Away	different	left	right	position	turn	1	far	1	1	0	unknown	14	15	16	14	19	3	8	11.52
225971	Human	Human	male	595	Astrid	female	2	5	4	AD	Away	different	left	right	position	turn	1	far	4	0	0	unknown	14	19	4	14	20	21	11.52	13.24
225971	Human	Human	male	595	Astrid	female	2	5	4	AD	Away	different	left	right	position	turn	1	far	1	1	0	unknown	14	20	22	14	21	23	13.24	14.32
225971	Human	Human	male	595	Astrid	female	2	5	4	AD	Away	different	left	right	position	turn	1	far	4	0	0	unknown	14	21	24	14	23	11	14.32	15.84
225971	Human	Human	male	595	Astrid	female	2	5	4	AD	Away	different	left	right	position	turn	1	far	1	1	0	unknown	14	23	12	14	26	14	15.84	18.96
225971	Human	Human	male	595	Astrid	female	2	5	4	AD	Away	different	left	right	position	turn	1	far	4	0	0	unknown	14	26	15	14	27	15	18.96	20
225971	Human	Human	male	595	Astrid	female	2	6	1	TS	Towards	same	right	right	position	start	1	far	1	1	0	unknown	16	20	15	16	28	13	0	7.96
225971	Human	Human	male	595	Astrid	female	2	6	1	TS	Towards	same	right	right	position	turn	1	far	2	1	0	unknown	16	28	14	16	31	9	7.96	10.8
225971	Human	Human	male	595	Astrid	female	2	6	1	TS	Towards	same	right	right	position	turn	1	far	1	1	0	unknown	16	31	10	16	38	4	10.8	17.6
225971	Human	Human	male	595	Astrid	female	2	6	1	TS	Towards	same	right	right	position	turn	1	far	4	0	0	unknown	16	38	5	16	39	22	17.6	19.32
225971	Human	Human	male	595	Astrid	female	2	6	1	TS	Towards	same	right	right	position	turn	1	far	1	1	0	unknown	16	39	23	16	40	14	19.32	20
225971	Human	Human	male	595	Astrid	female	2	7	2	TD	Towards	different	right	left	position	start	1	close	1	1	0	unknown	18	47	10	18	57	14	0	10.2
225971	Human	Human	male	595	Astrid	female	2	7	2	TD	Towards	different	right	left	visual	shrug	1	close	1	1	4	unknown	18	47	16	18	48	3	0.24	0.76
225971	Human	Human	male	595	Astrid	female	2	7	2	TD	Towards	different	right	left	visual	point	1	close	1	1	4	unknown	18	54	16	19	2	12	7.24	15.12	point (away); point to camera
225971	Human	Human	male	595	Astrid	female	2	7	2	TD	Towards	different	right	left	auditory	vocalization	1	close	1	1	4	unknown	18	55	3	18	56	0	7.72	8.64
225971	Human	Human	male	595	Astrid	female	2	7	2	TD	Towards	different	right	left	position	approach	1	arm	1	1	0	unknown	18	57	15	19	7	9	10.2	20
225971	Human	Human	male	595	Astrid	female	2	7	2	TD	Towards	different	right	left	auditory	vocalization	1	arm	1	1	4	unknown	18	58	0	18	58	23	10.6	11.56
225971	Human	Human	male	595	Astrid	female	2	7	2	TD	Towards	different	right	left	visual	point	1	arm	1	1	4	unknown	19	4	16	19	7	9	17.24	20	point (away); point to camera
225971	Human	Human	male	595	Astrid	female	2	7	2	TD	Towards	different	right	left	auditory	vocalization	1	arm	1	1	4	unknown	19	5	11	19	6	0	18.04	18.64
225971	Human	Human	male	595	Astrid	female	2	8	3	AS	Away	same	left	left	position	start	1	arm	1	1	0	unknown	21	24	11	21	36	18	0	12.32
225971	Human	Human	male	595	Astrid	female	2	8	3	AS	Away	same	left	left	position	turn	1	arm	4	0	0	unknown	21	36	19	21	38	22	12.32	14.48
225971	Human	Human	male	595	Astrid	female	2	8	3	AS	Away	same	left	left	position	turn	1	arm	1	1	0	unknown	21	38	23	21	44	10	14.48	20
222961	Human	Human	female	620	Heinz	male	1	1	2	TD	Towards	different	right	left	position	start	2	close	1	1	0	unknown	5	19	21	5	21	2	0	1.28
222961	Human	Human	female	620	Heinz	male	1	1	2	TD	Towards	different	right	left	position	switch	1	close	1	1	0	unknown	5	21	3	5	21	22	1.28	2.08
222961	Human	Human	female	620	Heinz	male	1	1	2	TD	Towards	different	right	left	visual	point	1	close	1	1	2	unknown	5	21	18	5	24	15	1.88	4.8
222961	Human	Human	female	620	Heinz	male	1	1	2	TD	Towards	different	right	left	position	turn	1	close	2	1	0	unknown	5	21	23	5	22	16	2.08	2.84
222961	Human	Human	female	620	Heinz	male	1	1	2	TD	Towards	different	right	left	auditory	vocalization	1	close	2	1	4	unknown	5	22	7	5	22	16	2.44	2.84	verbal ref (da)
222961	Human	Human	female	620	Heinz	male	1	1	2	TD	Towards	different	right	left	position	switch	2	close	2	1	0	unknown	5	22	17	5	23	12	2.84	3.68
222961	Human	Human	female	620	Heinz	male	1	1	2	TD	Towards	different	right	left	position	approach	2	arm	2	1	0	unknown	5	23	13	5	24	14	3.68	4.76
222961	Human	Human	female	620	Heinz	male	1	1	2	TD	Towards	different	right	left	auditory	vocalization	2	arm	2	1	4	unknown	5	24	4	5	24	15	4.32	4.8	verbal ref (da)
222961	Human	Human	female	620	Heinz	male	1	1	2	TD	Towards	different	right	left	position	turn	2	arm	1	1	0	unknown	5	24	15	5	25	2	4.76	5.28
222961	Human	Human	female	620	Heinz	male	1	1	2	TD	Towards	different	right	left	position	leave	2	close	1	1	0	unknown	5	25	3	5	25	22	5.28	6.08
222961	Human	Human	female	620	Heinz	male	1	1	2	TD	Towards	different	right	left	position	switch	1	close	1	1	0	unknown	5	25	23	5	26	16	6.08	6.84
222961	Human	Human	female	620	Heinz	male	1	1	2	TD	Towards	different	right	left	visual	point	1	close	1	1	2	unknown	5	26	9	5	28	18	6.52	8.92
222961	Human	Human	female	620	Heinz	male	1	1	2	TD	Towards	different	right	left	position	turn	1	close	2	1	0	unknown	5	26	17	5	27	3	6.84	7.32
222961	Human	Human	female	620	Heinz	male	1	1	2	TD	Towards	different	right	left	position	switch	2	close	2	1	0	unknown	5	27	4	5	27	15	7.32	7.8
222961	Human	Human	female	620	Heinz	male	1	1	2	TD	Towards	different	right	left	position	approach	2	arm	2	1	0	unknown	5	27	16	5	29	4	7.8	9.36
222961	Human	Human	female	620	Heinz	male	1	1	2	TD	Towards	different	right	left	auditory	vocalization	2	arm	2	1	4	unknown	5	28	6	5	29	0	8.4	9.2
222961	Human	Human	female	620	Heinz	male	1	1	2	TD	Towards	different	right	left	position	turn	2	arm	1	1	0	unknown	5	29	5	5	29	18	9.36	9.92
222961	Human	Human	female	620	Heinz	male	1	1	2	TD	Towards	different	right	left	position	turn	2	arm	2	1	0	unknown	5	29	19	5	31	11	9.92	11.64
222961	Human	Human	female	620	Heinz	male	1	1	2	TD	Towards	different	right	left	position	turn	2	arm	1	1	0	unknown	5	31	12	5	35	8	11.64	15.52
222961	Human	Human	female	620	Heinz	male	1	1	2	TD	Towards	different	right	left	position	turn	2	arm	4	0	0	unknown	5	35	9	5	36	7	15.52	16.48
222961	Human	Human	female	620	Heinz	male	1	1	2	TD	Towards	different	right	left	position	leave	2	close	4	0	0	unknown	5	36	8	5	37	2	16.48	17.28
222961	Human	Human	female	620	Heinz	male	1	1	2	TD	Towards	different	right	left	position	leave	2	far	4	0	0	unknown	5	37	3	5	38	23	17.28	19.12
222961	Human	Human	female	620	Heinz	male	1	1	2	TD	Towards	different	right	left	position	turn	2	far	2	1	0	unknown	5	38	24	5	39	20	19.12	20
222961	Human	Human	female	620	Heinz	male	1	2	3	AS	Away	same	left	left	position	start	1	arm	1	1	0	unknown	7	49	19	7	57	1	0	7.32
222961	Human	Human	female	620	Heinz	male	1	2	3	AS	Away	same	left	left	visual	reach	1	arm	1	1	1	unknown	7	50	2	7	51	21	0.32	2.12
222961	Human	Human	female	620	Heinz	male	1	2	3	AS	Away	same	left	left	auditory	vocalization	1	arm	1	1	4	unknown	7	50	5	7	50	19	0.44	1.04	verbal ref (da)
222961	Human	Human	female	620	Heinz	male	1	2	3	AS	Away	same	left	left	position	turn	1	close	1	1	0	unknown	7	57	2	7	59	4	7.32	9.44
222961	Human	Human	female	620	Heinz	male	1	2	3	AS	Away	same	left	left	position	turn	1	close	1	1	0	unknown	7	59	5	8	0	16	9.44	10.92
222961	Human	Human	female	620	Heinz	male	1	2	3	AS	Away	same	left	left	auditory	vocalization	1	close	1	1	4	unknown	7	59	11	8	0	7	9.68	10.56
222961	Human	Human	female	620	Heinz	male	1	2	3	AS	Away	same	left	left	visual	point	1	close	1	1	1	unknown	7	59	24	8	2	6	10.2	12.52
222961	Human	Human	female	620	Heinz	male	1	2	3	AS	Away	same	left	left	position	approach	1	arm	1	1	0	unknown	8	0	17	8	2	19	10.92	13.04
222961	Human	Human	female	620	Heinz	male	1	2	3	AS	Away	same	left	left	auditory	vocalization	1	arm	1	1	4	unknown	8	0	24	8	1	7	11.2	11.56	verbal ref (da)
222961	Human	Human	female	620	Heinz	male	1	2	3	AS	Away	same	left	left	position	turn	1	arm	4	0	0	unknown	8	2	20	8	6	3	13.04	16.4
222961	Human	Human	female	620	Heinz	male	1	2	3	AS	Away	same	left	left	position	leave	1	close	4	0	0	unknown	8	6	4	8	6	12	16.4	16.76
222961	Human	Human	female	620	Heinz	male	1	2	3	AS	Away	same	left	left	position	leave	1	far	4	0	0	unknown	8	6	13	8	9	18	16.76	20
222961	Human	Human	female	620	Heinz	male	1	3	4	AD	Away	different	left	right	position	start	1	close	1	1	0	unknown	9	56	3	10	0	21	0	4.76
222961	Human	Human	female	620	Heinz	male	1	3	4	AD	Away	different	left	right	position	turn	1	close	4	0	0	unknown	10	0	22	10	1	18	4.76	5.64
222961	Human	Human	female	620	Heinz	male	1	3	4	AD	Away	different	left	right	position	turn	1	close	1	1	0	unknown	10	1	19	10	3	8	5.64	7.24
222961	Human	Human	female	620	Heinz	male	1	3	4	AD	Away	different	left	right	auditory	vocalization	1	close	1	1	4	unknown	10	2	17	10	3	3	6.56	7.04
222961	Human	Human	female	620	Heinz	male	1	3	4	AD	Away	different	left	right	position	turn	1	close	2	1	0	unknown	10	3	9	10	5	17	7.24	9.6
222961	Human	Human	female	620	Heinz	male	1	3	4	AD	Away	different	left	right	auditory	vocalization	1	close	2	1	4	unknown	10	4	5	10	4	12	8.08	8.4	verbal ref (da)
222961	Human	Human	female	620	Heinz	male	1	3	4	AD	Away	different	left	right	position	switch	2	close	1	1	0	unknown	10	5	18	10	6	15	9.6	10.52
222961	Human	Human	female	620	Heinz	male	1	3	4	AD	Away	different	left	right	position	turn	2	close	4	0	0	unknown	10	6	16	10	10	12	10.52	14.4
222961	Human	Human	female	620	Heinz	male	1	3	4	AD	Away	different	left	right	position	switch	1	close	4	0	0	unknown	10	10	13	10	10	24	14.4	14.88
222961	Human	Human	female	620	Heinz	male	1	3	4	AD	Away	different	left	right	position	leave	1	far	4	0	0	unknown	10	11	0	10	16	2	14.88	20
222961	Human	Human	female	620	Heinz	male	1	4	1	TS	Towards	same	right	right	position	start	1	close	1	1	0	unknown	12	5	1	12	6	15	0	1.6
222961	Human	Human	female	620	Heinz	male	1	4	1	TS	Towards	same	right	right	visual	shake head	1	close	1	1	4	unknown	12	5	18	12	7	4	0.68	2.16
222961	Human	Human	female	620	Heinz	male	1	4	1	TS	Towards	same	right	right	auditory	vocalization	1	close	1	1	4	unknown	12	6	2	12	6	13	1.04	1.52
222961	Human	Human	female	620	Heinz	male	1	4	1	TS	Towards	same	right	right	position	turn	1	close	4	0	0	unknown	12	6	16	12	7	11	1.6	2.44
222961	Human	Human	female	620	Heinz	male	1	4	1	TS	Towards	same	right	right	position	switch	2	close	4	0	0	unknown	12	7	12	12	8	1	2.44	3.04
222961	Human	Human	female	620	Heinz	male	1	4	1	TS	Towards	same	right	right	position	turn	2	close	2	1	0	unknown	12	8	2	12	9	5	3.04	4.2
222961	Human	Human	female	620	Heinz	male	1	4	1	TS	Towards	same	right	right	auditory	vocalization	2	close	2	1	4	unknown	12	8	5	12	8	15	3.16	3.6
222961	Human	Human	female	620	Heinz	male	1	4	1	TS	Towards	same	right	right	position	approach	2	arm	2	1	0	unknown	12	9	6	12	9	7	4.2	4.28
222961	Human	Human	female	620	Heinz	male	1	4	1	TS	Towards	same	right	right	position	turn	2	arm	4	0	0	unknown	12	9	8	12	12	2	4.28	7.08
222961	Human	Human	female	620	Heinz	male	1	4	1	TS	Towards	same	right	right	position	turn	2	arm	1	1	0	unknown	12	12	3	12	12	21	7.08	7.84
222961	Human	Human	female	620	Heinz	male	1	4	1	TS	Towards	same	right	right	position	turn	2	arm	4	0	0	unknown	12	12	22	12	13	7	7.84	8.28
222961	Human	Human	female	620	Heinz	male	1	4	1	TS	Towards	same	right	right	position	leave	2	close	4	0	0	unknown	12	13	8	12	14	7	8.28	9.28
222961	Human	Human	female	620	Heinz	male	1	4	1	TS	Towards	same	right	right	position	leave	2	far	4	0	0	unknown	12	14	8	12	25	0	9.28	20
222961	Human	Human	female	620	Heinz	male	2	5	1	TS	Towards	same	left	left	position	start	1	far	4	0	0	unknown	14	51	12	15	11	11	0	20
222961	Human	Human	female	620	Heinz	male	2	6	4	AD	Away	different	right	left	position	start	2	arm	2	1	0	unknown	18	3	2	18	5	5	0	2.16
222961	Human	Human	female	620	Heinz	male	2	6	4	AD	Away	different	right	left	visual	reach	2	arm	2	1	2	unknown	18	3	10	18	5	5	0.32	2.16
222961	Human	Human	female	620	Heinz	male	2	6	4	AD	Away	different	right	left	auditory	vocalization	2	arm	2	1	4	unknown	18	3	17	18	4	8	0.6	1.28
222961	Human	Human	female	620	Heinz	male	2	6	4	AD	Away	different	right	left	auditory	vocalization	2	arm	2	1	4	unknown	18	4	23	18	5	15	1.84	2.56
222961	Human	Human	female	620	Heinz	male	2	6	4	AD	Away	different	right	left	position	turn	2	arm	4	0	0	unknown	18	5	6	18	5	17	2.16	2.64
222961	Human	Human	female	620	Heinz	male	2	6	4	AD	Away	different	right	left	position	turn	2	arm	2	1	0	unknown	18	5	18	18	13	11	2.64	10.4
222961	Human	Human	female	620	Heinz	male	2	6	4	AD	Away	different	right	left	position	turn	2	arm	4	0	0	unknown	18	13	12	18	17	16	10.4	14.6
222961	Human	Human	female	620	Heinz	male	2	6	4	AD	Away	different	right	left	position	leave	2	close	4	0	0	unknown	18	17	17	18	18	4	14.6	15.12
222961	Human	Human	female	620	Heinz	male	2	6	4	AD	Away	different	right	left	position	leave	2	far	4	0	0	unknown	18	18	5	18	23	1	15.12	20
222961	Human	Human	female	620	Heinz	male	2	7	3	AS	Away	same	right	right	position	start	1	arm	1	1	0	unknown	21	50	3	21	50	11	0	0.36
222961	Human	Human	female	620	Heinz	male	2	7	3	AS	Away	same	right	right	position	turn	1	arm	2	1	0	unknown	21	50	12	21	53	7	0.36	3.2
222961	Human	Human	female	620	Heinz	male	2	7	3	AS	Away	same	right	right	position	switch	2	arm	2	1	0	unknown	21	53	8	21	54	8	3.2	4.24
222961	Human	Human	female	620	Heinz	male	2	7	3	AS	Away	same	right	right	position	turn	2	arm	4	0	0	unknown	21	54	9	21	55	20	4.24	5.72
222961	Human	Human	female	620	Heinz	male	2	7	3	AS	Away	same	right	right	position	turn	2	arm	2	1	0	unknown	21	55	21	22	6	10	5.72	16.32
222961	Human	Human	female	620	Heinz	male	2	7	3	AS	Away	same	right	right	auditory	vocalization	2	arm	2	1	4	unknown	22	5	11	22	6	2	15.32	16
222961	Human	Human	female	620	Heinz	male	2	7	3	AS	Away	same	right	right	position	turn	2	arm	1	1	0	unknown	22	6	11	22	9	15	16.32	19.52
222961	Human	Human	female	620	Heinz	male	2	7	3	AS	Away	same	right	right	position	switch	1	close	1	1	0	unknown	22	9	16	22	10	2	19.52	20
222961	Human	Human	female	620	Heinz	male	2	8	2	TD	Towards	different	left	right	position	start	3	far	4	0	0	unknown	24	3	2	24	9	1	0	6
222961	Human	Human	female	620	Heinz	male	2	8	2	TD	Towards	different	left	right	position	turn	3	far	1	1	0	unknown	24	9	2	24	14	3	6	11.08
222961	Human	Human	female	620	Heinz	male	2	8	2	TD	Towards	different	left	right	position	turn	3	far	4	0	0	unknown	24	14	4	24	23	1	11.08	20
236889	Human	Human	female	600	Heinz	male	1	1	3	AS	Away	same	left	left	position	start	1	far	1	1	0	unknown	6	43	22	6	49	0	0	5.16
236889	Human	Human	female	600	Heinz	male	1	1	3	AS	Away	same	left	left	position	turn	1	far	4	0	0	unknown	6	49	1	7	2	15	5.16	18.76
236889	Human	Human	female	600	Heinz	male	1	1	3	AS	Away	same	left	left	position	turn	1	far	1	1	0	unknown	7	2	16	7	3	21	18.76	20
236889	Human	Human	female	600	Heinz	male	1	2	4	AD	Away	different	left	right	position	start	1	far	1	1	0	unknown	9	27	8	9	29	5	0	1.92
236889	Human	Human	female	600	Heinz	male	1	2	4	AD	Away	different	left	right	position	turn	1	far	4	0	0	unknown	9	29	6	9	47	7	1.92	20
236889	Human	Human	female	600	Heinz	male	1	2	4	AD	Away	different	left	right	auditory	vocalization	1	far	4	0	4	unknown	9	30	19	9	31	4	3.44	3.88
236889	Human	Human	female	600	Heinz	male	1	2	4	AD	Away	different	left	right	action	touch	1	far	4	0	0	unknown	9	37	11	9	41	6	10.12	13.96	pling-machine
236889	Human	Human	female	600	Heinz	male	1	2	4	AD	Away	different	left	right	action	touch	1	far	4	0	0	unknown	9	42	22	9	47	7	15.56	20
236889	Human	Human	female	600	Heinz	male	1	2	4	AD	Away	different	left	right	auditory	vocalization	1	far	4	0	4	unknown	9	45	3	9	45	14	17.8	18.28
236889	Human	Human	female	600	Heinz	male	1	3	2	TD	Towards	different	right	left	position	start	2	far	1	1	0	unknown	11	45	21	11	50	8	0	4.52
236889	Human	Human	female	600	Heinz	male	1	3	2	TD	Towards	different	right	left	position	turn	2	far	4	0	0	unknown	11	50	9	11	55	12	4.52	9.68
236889	Human	Human	female	600	Heinz	male	1	3	2	TD	Towards	different	right	left	position	turn	2	far	1	1	0	unknown	11	55	13	11	58	8	9.68	12.52
236889	Human	Human	female	600	Heinz	male	1	3	2	TD	Towards	different	right	left	position	turn	2	far	4	0	0	unknown	11	58	9	12	5	20	12.52	20
236889	Human	Human	female	600	Heinz	male	1	3	2	TD	Towards	different	right	left	action	touch	2	far	4	0	0	unknown	12	1	18	12	5	20	15.88	20	pling-machine
236889	Human	Human	female	600	Heinz	male	1	4	1	TS	Towards	same	right	right	position	start	2	far	1	1	0	unknown	14	25	9	14	26	5	0	0.88
236889	Human	Human	female	600	Heinz	male	1	4	1	TS	Towards	same	right	right	position	turn	2	far	4	0	0	unknown	14	26	6	14	27	18	0.88	2.4
236889	Human	Human	female	600	Heinz	male	1	4	1	TS	Towards	same	right	right	position	turn	2	far	1	1	0	unknown	14	27	19	14	37	21	2.4	12.52
236889	Human	Human	female	600	Heinz	male	1	4	1	TS	Towards	same	right	right	position	turn	2	far	4	0	0	unknown	14	37	22	14	45	8	12.52	20
236889	Human	Human	female	600	Heinz	male	2	5	1	TS	Towards	same	left	left	position	start	1	far	1	1	0	unknown	16	50	11	16	51	21	0	1.44
236889	Human	Human	female	600	Heinz	male	2	5	1	TS	Towards	same	left	left	action	touch	1	far	1	1	0	unknown	16	50	11	17	0	14	0	10.16	pling-machine
236889	Human	Human	female	600	Heinz	male	2	5	1	TS	Towards	same	left	left	position	turn	1	far	4	0	0	unknown	16	51	22	16	55	14	1.44	5.16
236889	Human	Human	female	600	Heinz	male	2	5	1	TS	Towards	same	left	left	position	turn	1	far	1	1	0	unknown	16	55	15	17	0	14	5.16	10.16
236889	Human	Human	female	600	Heinz	male	2	5	1	TS	Towards	same	left	left	position	turn	1	far	4	0	0	unknown	17	0	15	17	3	18	10.16	13.32
236889	Human	Human	female	600	Heinz	male	2	5	1	TS	Towards	same	left	left	position	turn	1	far	1	1	0	unknown	17	3	19	17	10	10	13.32	20
236889	Human	Human	female	600	Heinz	male	2	6	2	TD	Towards	different	left	right	position	start	1	far	1	1	0	unknown	19	21	5	19	32	20	0	11.64
236889	Human	Human	female	600	Heinz	male	2	6	2	TD	Towards	different	left	right	position	turn	1	far	4	0	0	unknown	19	32	21	19	41	4	11.64	20
236889	Human	Human	female	600	Heinz	male	2	7	4	AD	Away	different	right	left	position	start	2	far	1	1	0	unknown	21	41	7	22	1	6	0	20
236889	Human	Human	female	600	Heinz	male	2	8	3	AS	Away	same	right	right	position	start	2	far	1	1	0	unknown	24	16	11	24	36	10	0	20
226031	Human	Human	female	623	Heinz	male	1	1	1	TS	Towards	same	right	right	position	start	1	far	1	1	0	unknown	5	5	6	5	5	15	0	0.4
226031	Human	Human	female	623	Heinz	male	1	1	1	TS	Towards	same	right	right	visual	point	1	far	1	1	1	unknown	5	5	6	5	13	4	0	7.96
226031	Human	Human	female	623	Heinz	male	1	1	1	TS	Towards	same	right	right	position	approach	1	close	1	1	0	unknown	5	5	16	5	7	18	0.4	2.52
226031	Human	Human	female	623	Heinz	male	1	1	1	TS	Towards	same	right	right	auditory	vocalization	1	close	1	1	4	unknown	5	5	16	5	6	1	0.4	0.84	verbal ref (da)
226031	Human	Human	female	623	Heinz	male	1	1	1	TS	Towards	same	right	right	auditory	vocalization	1	close	1	1	4	unknown	5	7	1	5	7	10	1.8	2.2
226031	Human	Human	female	623	Heinz	male	1	1	1	TS	Towards	same	right	right	position	approach	1	close	1	1	0	unknown	5	7	19	5	8	20	2.52	3.6
226031	Human	Human	female	623	Heinz	male	1	1	1	TS	Towards	same	right	right	position	approach	1	arm	1	1	0	unknown	5	8	21	5	13	3	3.6	7.92
226031	Human	Human	female	623	Heinz	male	1	1	1	TS	Towards	same	right	right	auditory	vocalization	1	arm	1	1	4	unknown	5	8	21	5	9	7	3.6	4.08	verbal ref (da)
226031	Human	Human	female	623	Heinz	male	1	1	1	TS	Towards	same	right	right	auditory	vocalization	1	arm	1	1	4	unknown	5	10	7	5	10	23	5.04	5.72
226031	Human	Human	female	623	Heinz	male	1	1	1	TS	Towards	same	right	right	auditory	vocalization	1	arm	1	1	4	unknown	5	11	9	5	12	2	6.12	6.88	verbal ref (unten)
226031	Human	Human	female	623	Heinz	male	1	1	1	TS	Towards	same	right	right	auditory	vocalization	1	arm	1	1	4	unknown	5	13	10	5	14	3	8.16	8.92	verbal ref (unten)
226031	Human	Human	female	623	Heinz	male	1	1	1	TS	Towards	same	right	right	position	leave	1	far	4	0	0	unknown	5	13	4	5	16	2	7.92	10.88
226031	Human	Human	female	623	Heinz	male	1	1	1	TS	Towards	same	right	right	auditory	vocalization	1	far	4	0	4	unknown	5	15	7	5	15	24	10.04	10.76	verbal ref (unten)
226031	Human	Human	female	623	Heinz	male	1	1	1	TS	Towards	same	right	right	position	turn	1	far	1	1	0	unknown	5	16	3	5	18	19	10.88	13.56
226031	Human	Human	female	623	Heinz	male	1	1	1	TS	Towards	same	right	right	visual	point	1	far	1	1	1	unknown	5	16	3	5	18	19	10.88	13.56
226031	Human	Human	female	623	Heinz	male	1	1	1	TS	Towards	same	right	right	auditory	vocalization	1	far	1	1	4	unknown	5	16	3	5	16	22	10.88	11.68	verbal ref (unten)
226031	Human	Human	female	623	Heinz	male	1	1	1	TS	Towards	same	right	right	auditory	vocalization	1	far	1	1	4	unknown	5	17	19	5	18	12	12.52	13.28	verbal ref (unten)
226031	Human	Human	female	623	Heinz	male	1	1	1	TS	Towards	same	right	right	position	turn	1	far	4	0	0	unknown	5	18	20	5	23	8	13.56	18.12
226031	Human	Human	female	623	Heinz	male	1	1	1	TS	Towards	same	right	right	auditory	vocalization	1	far	4	0	4	unknown	5	19	18	5	20	14	14.48	15.36	verbal ref (unten)
226031	Human	Human	female	623	Heinz	male	1	1	1	TS	Towards	same	right	right	position	turn	1	far	1	1	0	unknown	5	23	9	5	24	5	18.12	19
226031	Human	Human	female	623	Heinz	male	1	1	1	TS	Towards	same	right	right	action	touch	1	far	1	1	0	unknown	5	23	9	5	25	5	18.12	20	pling-machine
226031	Human	Human	female	623	Heinz	male	1	1	1	TS	Towards	same	right	right	auditory	vocalization	1	far	1	1	4	unknown	5	23	12	5	24	15	18.24	19.4	verbal (aufmachen?)
226031	Human	Human	female	623	Heinz	male	1	1	1	TS	Towards	same	right	right	position	turn	1	far	4	0	0	unknown	5	24	6	5	25	5	19	20
226031	Human	Human	female	623	Heinz	male	1	2	3	AS	Away	same	left	left	position	start	1	far	1	1	0	unknown	7	2	17	7	10	24	0	8.32
226031	Human	Human	female	623	Heinz	male	1	2	3	AS	Away	same	left	left	position	turn	1	far	4	0	0	unknown	7	11	0	7	12	20	8.32	10.16
226031	Human	Human	female	623	Heinz	male	1	2	3	AS	Away	same	left	left	position	turn	1	far	1	1	0	unknown	7	12	21	7	16	11	10.16	13.8
226031	Human	Human	female	623	Heinz	male	1	2	3	AS	Away	same	left	left	visual	point	1	far	1	1	1	unknown	7	12	23	7	13	21	10.24	11.2
226031	Human	Human	female	623	Heinz	male	1	2	3	AS	Away	same	left	left	auditory	vocalization	1	far	1	1	4	unknown	7	13	3	7	13	14	10.44	10.92
226031	Human	Human	female	623	Heinz	male	1	2	3	AS	Away	same	left	left	auditory	vocalization	1	far	1	1	4	unknown	7	14	20	7	15	5	12.12	12.56
226031	Human	Human	female	623	Heinz	male	1	2	3	AS	Away	same	left	left	visual	point	1	far	1	1	1	unknown	7	14	20	7	15	18	12.12	13.08
226031	Human	Human	female	623	Heinz	male	1	2	3	AS	Away	same	left	left	position	turn	1	far	4	0	0	unknown	7	16	12	7	18	13	13.8	15.88
226031	Human	Human	female	623	Heinz	male	1	2	3	AS	Away	same	left	left	position	turn	1	far	1	1	0	unknown	7	18	14	7	20	24	15.88	18.32
226031	Human	Human	female	623	Heinz	male	1	2	3	AS	Away	same	left	left	visual	point	1	far	1	1	1	unknown	7	18	14	7	19	13	15.88	16.88
226031	Human	Human	female	623	Heinz	male	1	2	3	AS	Away	same	left	left	auditory	vocalization	1	far	1	1	4	unknown	7	19	11	7	20	1	16.76	17.4
226031	Human	Human	female	623	Heinz	male	1	2	3	AS	Away	same	left	left	position	turn	1	far	4	0	0	unknown	7	21	0	7	22	16	18.32	20
226031	Human	Human	female	623	Heinz	male	1	3	2	TD	Towards	different	right	left	position	start	1	far	2	1	0	unknown	9	15	21	9	24	20	0	9
226031	Human	Human	female	623	Heinz	male	1	3	2	TD	Towards	different	right	left	visual	point	1	far	2	1	2	unknown	9	15	21	9	24	20	0	9
226031	Human	Human	female	623	Heinz	male	1	3	2	TD	Towards	different	right	left	auditory	vocalization	1	far	2	1	4	unknown	9	16	5	9	16	17	0.36	0.88	verbal ref (da)
226031	Human	Human	female	623	Heinz	male	1	3	2	TD	Towards	different	right	left	auditory	vocalization	1	far	2	1	4	unknown	9	18	9	9	18	16	2.52	2.84	verbal ref (da)
226031	Human	Human	female	623	Heinz	male	1	3	2	TD	Towards	different	right	left	auditory	vocalization	1	far	2	1	4	unknown	9	19	5	9	19	19	3.36	3.96	verbal ref (da)
226031	Human	Human	female	623	Heinz	male	1	3	2	TD	Towards	different	right	left	auditory	vocalization	1	far	2	1	4	unknown	9	20	1	9	20	19	4.2	4.96	verbal ref (unten)
226031	Human	Human	female	623	Heinz	male	1	3	2	TD	Towards	different	right	left	auditory	vocalization	1	far	2	1	4	unknown	9	22	9	9	22	19	6.52	6.96	verbal ref (da)
226031	Human	Human	female	623	Heinz	male	1	3	2	TD	Towards	different	right	left	position	turn	1	far	4	0	0	unknown	9	24	21	9	35	20	9	20
226031	Human	Human	female	623	Heinz	male	1	3	2	TD	Towards	different	right	left	visual	point	1	far	4	0	1	unknown	9	26	23	9	35	20	11.08	20
226031	Human	Human	female	623	Heinz	male	1	3	2	TD	Towards	different	right	left	auditory	vocalization	1	far	4	0	4	unknown	9	27	10	9	27	20	11.56	12
226031	Human	Human	female	623	Heinz	male	1	3	2	TD	Towards	different	right	left	auditory	vocalization	1	far	4	0	4	unknown	9	35	2	9	35	12	19.24	19.68
226031	Human	Human	female	623	Heinz	male	1	4	4	AD	Away	different	left	right	position	start	2	far	1	1	0	unknown	11	23	22	11	24	23	0	1.08
226031	Human	Human	female	623	Heinz	male	1	4	4	AD	Away	different	left	right	position	turn	2	far	4	0	0	unknown	11	24	24	11	26	22	1.08	3.04
226031	Human	Human	female	623	Heinz	male	1	4	4	AD	Away	different	left	right	position	turn	2	far	1	1	0	unknown	11	26	23	11	29	16	3.04	5.8
226031	Human	Human	female	623	Heinz	male	1	4	4	AD	Away	different	left	right	position	turn	2	far	2	1	0	unknown	11	29	17	11	35	5	5.8	11.36
226031	Human	Human	female	623	Heinz	male	1	4	4	AD	Away	different	left	right	visual	point	2	far	2	1	2	unknown	11	32	9	11	37	22	8.48	14.04
226031	Human	Human	female	623	Heinz	male	1	4	4	AD	Away	different	left	right	auditory	vocalization	2	far	2	1	4	unknown	11	32	17	11	33	3	8.8	9.28	verbal ref (da); directed to E2
226031	Human	Human	female	623	Heinz	male	1	4	4	AD	Away	different	left	right	position	turn	2	far	4	0	0	unknown	11	35	6	11	36	6	11.36	12.4
226031	Human	Human	female	623	Heinz	male	1	4	4	AD	Away	different	left	right	position	turn	2	far	2	1	0	unknown	11	36	7	11	43	21	12.4	20
226031	Human	Human	female	623	Heinz	male	2	5	4	AD	Away	different	right	left	position	start	2	far	1	1	0	unknown	13	20	6	13	26	7	0	6.08
226031	Human	Human	female	623	Heinz	male	2	5	4	AD	Away	different	right	left	position	turn	2	far	4	0	0	unknown	13	26	8	13	37	9	6.08	17.16
226031	Human	Human	female	623	Heinz	male	2	5	4	AD	Away	different	right	left	visual	point	2	far	4	0	1	unknown	13	26	8	13	36	17	6.08	16.48	directed to E2
226031	Human	Human	female	623	Heinz	male	2	5	4	AD	Away	different	right	left	auditory	vocalization	2	far	4	0	4	unknown	13	26	14	13	27	0	6.32	6.8	directed to E2
226031	Human	Human	female	623	Heinz	male	2	5	4	AD	Away	different	right	left	auditory	vocalization	2	far	4	0	4	unknown	13	30	2	13	30	13	9.84	10.32	directed to E2
226031	Human	Human	female	623	Heinz	male	2	5	4	AD	Away	different	right	left	auditory	vocalization	2	far	4	0	4	unknown	13	33	4	13	33	17	12.92	13.48	directed to parent
226031	Human	Human	female	623	Heinz	male	2	5	4	AD	Away	different	right	left	auditory	vocalization	2	far	4	0	4	unknown	13	36	11	13	37	1	16.2	16.84	verbal (mama); directed to parent
226031	Human	Human	female	623	Heinz	male	2	5	4	AD	Away	different	right	left	position	turn	2	far	1	1	0	unknown	13	37	10	13	40	5	17.16	20
226031	Human	Human	female	623	Heinz	male	2	5	4	AD	Away	different	right	left	visual	point	2	far	1	1	1	unknown	13	37	10	13	38	14	17.16	18.36	point (right)
226031	Human	Human	female	623	Heinz	male	2	5	4	AD	Away	different	right	left	auditory	vocalization	2	far	1	1	4	unknown	13	37	10	13	37	23	17.16	17.72	directed to E2?
226031	Human	Human	female	623	Heinz	male	2	6	2	TD	Towards	different	left	right	position	start	2	far	1	1	0	unknown	15	13	4	15	18	3	0	5
226031	Human	Human	female	623	Heinz	male	2	6	2	TD	Towards	different	left	right	auditory	vocalization	2	far	1	1	4	unknown	15	14	16	15	15	14	1.48	2.44	verbal ref (rein)
226031	Human	Human	female	623	Heinz	male	2	6	2	TD	Towards	different	left	right	action	touch	2	far	1	1	0	unknown	15	15	5	15	18	3	2.04	5	pling-machine
226031	Human	Human	female	623	Heinz	male	2	6	2	TD	Towards	different	left	right	auditory	vocalization	2	far	1	1	4	unknown	15	15	19	15	16	4	2.6	3.04	verbal ref (da)
226031	Human	Human	female	623	Heinz	male	2	6	2	TD	Towards	different	left	right	auditory	vocalization	2	far	1	1	4	unknown	15	16	9	15	16	22	3.2	3.76	verbal ref (da)
226031	Human	Human	female	623	Heinz	male	2	6	2	TD	Towards	different	left	right	visual	point	2	far	1	1	1	unknown	15	16	12	15	18	3	3.32	5
226031	Human	Human	female	623	Heinz	male	2	6	2	TD	Towards	different	left	right	position	turn	2	far	4	0	0	unknown	15	18	4	15	19	11	5	6.32
226031	Human	Human	female	623	Heinz	male	2	6	2	TD	Towards	different	left	right	position	turn	2	far	1	1	0	unknown	15	19	12	15	22	19	6.32	9.64
226031	Human	Human	female	623	Heinz	male	2	6	2	TD	Towards	different	left	right	auditory	vocalization	2	far	1	1	4	unknown	15	19	12	15	20	12	6.32	7.36	verbal ref (dort rein)
226031	Human	Human	female	623	Heinz	male	2	6	2	TD	Towards	different	left	right	action	touch	2	far	1	1	0	unknown	15	20	13	15	23	4	7.36	10.04	pling-machine
226031	Human	Human	female	623	Heinz	male	2	6	2	TD	Towards	different	left	right	auditory	vocalization	2	far	4	0	4	unknown	15	21	13	15	22	4	8.36	9.04
226031	Human	Human	female	623	Heinz	male	2	6	2	TD	Towards	different	left	right	position	turn	2	far	4	0	0	unknown	15	22	20	15	28	20	9.64	15.68
226031	Human	Human	female	623	Heinz	male	2	6	2	TD	Towards	different	left	right	auditory	vocalization	2	far	4	0	4	unknown	15	22	20	15	23	17	9.64	10.56	verbal ref (dort rein)
226031	Human	Human	female	623	Heinz	male	2	6	2	TD	Towards	different	left	right	auditory	vocalization	2	far	4	0	4	unknown	15	26	18	15	27	16	13.56	14.52
226031	Human	Human	female	623	Heinz	male	2	6	2	TD	Towards	different	left	right	auditory	vocalization	2	far	4	0	4	unknown	15	28	0	15	29	2	14.84	15.96
226031	Human	Human	female	623	Heinz	male	2	6	2	TD	Towards	different	left	right	position	turn	2	far	1	1	0	unknown	15	28	21	15	31	21	15.68	18.72
226031	Human	Human	female	623	Heinz	male	2	6	2	TD	Towards	different	left	right	position	turn	2	far	4	0	0	unknown	15	31	22	15	33	3	18.72	20
226031	Human	Human	female	623	Heinz	male	2	7	3	AS	Away	same	right	right	position	start	1	far	1	1	0	unknown	17	25	21	17	29	20	0	4
226031	Human	Human	female	623	Heinz	male	2	7	3	AS	Away	same	right	right	position	turn	1	far	4	0	0	unknown	17	29	21	17	45	20	4	20
226031	Human	Human	female	623	Heinz	male	2	7	3	AS	Away	same	right	right	auditory	vocalization	1	far	4	0	4	unknown	17	30	22	17	33	1	5.04	7.24
226031	Human	Human	female	623	Heinz	male	2	7	3	AS	Away	same	right	right	action	touch	1	far	4	0	0	unknown	17	42	9	17	45	20	16.52	20	pling-machine
226031	Human	Human	female	623	Heinz	male	2	7	3	AS	Away	same	right	right	auditory	vocalization	1	far	4	0	4	unknown	17	43	3	17	45	20	17.28	20
228501	Human	Human	male	601	Antje	female	1	1	4	AD	Away	different	right	left	position	start	2	far	1	1	0	unknown	5	31	7	5	31	18	0	0.48
228501	Human	Human	male	601	Antje	female	1	1	4	AD	Away	different	right	left	position	turn	2	far	2	1	0	unknown	5	31	19	5	35	1	0.48	3.8
228501	Human	Human	male	601	Antje	female	1	1	4	AD	Away	different	right	left	auditory	vocalization	2	far	2	1	4	unknown	5	32	6	5	34	19	0.96	3.52
228501	Human	Human	male	601	Antje	female	1	1	4	AD	Away	different	right	left	position	approach	2	arm	2	1	0	unknown	5	35	2	5	36	24	3.8	5.72
228501	Human	Human	male	601	Antje	female	1	1	4	AD	Away	different	right	left	visual	reach	2	arm	2	1	2	unknown	5	35	10	5	37	17	4.12	6.44
228501	Human	Human	male	601	Antje	female	1	1	4	AD	Away	different	right	left	auditory	vocalization	2	arm	2	1	4	unknown	5	36	13	5	36	21	5.24	5.6
228501	Human	Human	male	601	Antje	female	1	1	4	AD	Away	different	right	left	position	turn	2	arm	1	1	0	unknown	5	37	0	5	39	14	5.72	8.32
228501	Human	Human	male	601	Antje	female	1	1	4	AD	Away	different	right	left	auditory	vocalization	2	arm	2	1	4	unknown	5	37	22	5	38	7	6.6	7.04
228501	Human	Human	male	601	Antje	female	1	1	4	AD	Away	different	right	left	position	switch	1	close	1	1	0	unknown	5	39	15	5	40	14	8.32	9.32
228501	Human	Human	male	601	Antje	female	1	1	4	AD	Away	different	right	left	position	approach	1	arm	1	1	0	unknown	5	40	15	5	49	7	9.32	18.04
228501	Human	Human	male	601	Antje	female	1	1	4	AD	Away	different	right	left	auditory	vocalization	1	arm	1	1	4	unknown	5	42	16	5	42	23	11.36	11.68
228501	Human	Human	male	601	Antje	female	1	1	4	AD	Away	different	right	left	position	turn	1	arm	4	0	0	unknown	5	49	8	5	51	6	18.04	20
228501	Human	Human	male	601	Antje	female	1	1	4	AD	Away	different	right	left	auditory	vocalization	1	arm	4	0	4	unknown	5	50	7	5	50	19	19	19.52
228501	Human	Human	male	601	Antje	female	1	1	4	AD	Away	different	right	left	visual	point	1	arm	4	0	4	unknown	5	51	1	5	51	6	19.76	20	point (away); point to pling-machine?
228501	Human	Human	male	601	Antje	female	1	2	3	AS	Away	same	left	left	position	start	1	arm	1	1	0	unknown	8	17	11	8	26	22	0	9.48
228501	Human	Human	male	601	Antje	female	1	2	3	AS	Away	same	left	left	visual	reach	1	arm	1	1	1	unknown	8	25	12	8	28	15	8.04	11.2
228501	Human	Human	male	601	Antje	female	1	2	3	AS	Away	same	left	left	position	turn	1	arm	4	0	0	unknown	8	26	23	8	34	11	9.48	17.04
228501	Human	Human	male	601	Antje	female	1	2	3	AS	Away	same	left	left	position	turn	1	arm	1	1	0	unknown	8	34	12	8	36	23	17.04	19.52
228501	Human	Human	male	601	Antje	female	1	2	3	AS	Away	same	left	left	position	turn	1	arm	4	0	0	unknown	8	36	24	8	37	10	19.52	20
228501	Human	Human	male	601	Antje	female	1	3	1	TS	Towards	same	right	right	position	start	1	arm	1	1	0	unknown	10	35	10	10	42	3	0	6.76
228501	Human	Human	male	601	Antje	female	1	3	1	TS	Towards	same	right	right	auditory	vocalization	1	arm	1	1	4	unknown	10	37	10	10	37	23	2	2.56	verbal ref (da)
228501	Human	Human	male	601	Antje	female	1	3	1	TS	Towards	same	right	right	visual	reach	1	arm	1	1	1	unknown	10	38	2	10	40	12	2.68	5.12
228501	Human	Human	male	601	Antje	female	1	3	1	TS	Towards	same	right	right	auditory	vocalization	1	arm	1	1	4	unknown	10	38	24	10	39	11	3.56	4.08	verbal ref (da)
228501	Human	Human	male	601	Antje	female	1	3	1	TS	Towards	same	right	right	visual	point	1	arm	1	1	1	unknown	10	40	16	10	41	18	5.24	6.36
228501	Human	Human	male	601	Antje	female	1	3	1	TS	Towards	same	right	right	auditory	vocalization	1	arm	1	1	4	unknown	10	41	3	10	41	18	5.72	6.36
228501	Human	Human	male	601	Antje	female	1	3	1	TS	Towards	same	right	right	position	turn	1	arm	4	0	0	unknown	10	42	4	10	47	3	6.76	11.76
228501	Human	Human	male	601	Antje	female	1	3	1	TS	Towards	same	right	right	position	turn	1	arm	1	1	0	unknown	10	47	4	10	55	9	11.76	20
228501	Human	Human	male	601	Antje	female	1	3	1	TS	Towards	same	right	right	visual	reach	1	arm	1	1	1	unknown	10	47	23	10	50	22	12.52	15.52
228501	Human	Human	male	601	Antje	female	1	3	1	TS	Towards	same	right	right	auditory	vocalization	1	arm	1	1	4	unknown	10	49	9	10	50	8	13.96	14.96
228501	Human	Human	male	601	Antje	female	1	3	1	TS	Towards	same	right	right	auditory	vocalization	1	arm	1	1	4	unknown	10	51	2	10	55	9	15.68	20
228501	Human	Human	male	601	Antje	female	1	3	1	TS	Towards	same	right	right	visual	reach	1	arm	1	1	1	unknown	10	54	16	10	55	9	19.24	20
228501	Human	Human	male	601	Antje	female	1	4	2	TD	Towards	different	left	right	position	start	1	close	1	1	0	unknown	12	43	18	12	44	21	0	1.16
228501	Human	Human	male	601	Antje	female	1	4	2	TD	Towards	different	left	right	visual	point	1	close	1	1	1	unknown	12	43	20	12	44	20	0.08	1.12
228501	Human	Human	male	601	Antje	female	1	4	2	TD	Towards	different	left	right	auditory	vocalization	1	close	1	1	4	unknown	12	44	5	12	44	18	0.48	1.04
228501	Human	Human	male	601	Antje	female	1	4	2	TD	Towards	different	left	right	position	turn	1	close	2	1	0	unknown	12	44	22	12	46	13	1.16	2.84
228501	Human	Human	male	601	Antje	female	1	4	2	TD	Towards	different	left	right	auditory	vocalization	1	close	2	1	4	unknown	12	45	11	12	45	24	1.72	2.28	verbal ref (alle)
228501	Human	Human	male	601	Antje	female	1	4	2	TD	Towards	different	left	right	visual	point	1	close	2	1	2	unknown	12	45	20	12	48	6	2.08	4.56
228501	Human	Human	male	601	Antje	female	1	4	2	TD	Towards	different	left	right	position	switch	2	arm	2	1	0	unknown	12	46	14	12	54	18	2.84	11.04
228501	Human	Human	male	601	Antje	female	1	4	2	TD	Towards	different	left	right	auditory	vocalization	2	arm	2	1	4	unknown	12	46	16	12	47	8	2.92	3.64
228501	Human	Human	male	601	Antje	female	1	4	2	TD	Towards	different	left	right	auditory	vocalization	2	arm	2	1	4	unknown	12	48	6	12	48	14	4.52	4.88
228501	Human	Human	male	601	Antje	female	1	4	2	TD	Towards	different	left	right	action	bang	2	arm	2	1	2	unknown	12	51	8	12	52	13	7.6	8.84	3x
228501	Human	Human	male	601	Antje	female	1	4	2	TD	Towards	different	left	right	auditory	vocalization	2	arm	2	1	4	unknown	12	53	1	12	53	10	9.32	9.72
228501	Human	Human	male	601	Antje	female	1	4	2	TD	Towards	different	left	right	visual	reach	2	arm	2	1	2	unknown	12	53	5	12	56	16	9.48	12.96
228501	Human	Human	male	601	Antje	female	1	4	2	TD	Towards	different	left	right	position	turn	2	arm	4	0	0	unknown	12	54	19	12	59	10	11.04	15.72
228501	Human	Human	male	601	Antje	female	1	4	2	TD	Towards	different	left	right	position	turn	2	arm	2	1	0	unknown	12	59	11	13	1	5	15.72	17.52
228501	Human	Human	male	601	Antje	female	1	4	2	TD	Towards	different	left	right	position	turn	2	arm	1	1	0	unknown	13	1	6	13	3	0	17.52	19.32
228501	Human	Human	male	601	Antje	female	1	4	2	TD	Towards	different	left	right	auditory	vocalization	2	arm	1	1	4	unknown	13	1	6	13	1	19	17.52	18.08
228501	Human	Human	male	601	Antje	female	1	4	2	TD	Towards	different	left	right	position	switch	1	arm	1	1	0	unknown	13	3	1	13	3	17	19.32	20
228501	Human	Human	male	601	Antje	female	1	4	2	TD	Towards	different	left	right	auditory	vocalization	1	arm	1	1	4	unknown	13	3	1	13	3	12	19.32	19.8	verbal ref (da)
228501	Human	Human	male	601	Antje	female	2	5	1	TS	Towards	same	left	left	position	start	2	arm	2	1	0	unknown	14	38	1	14	43	13	0	5.52
228501	Human	Human	male	601	Antje	female	2	5	1	TS	Towards	same	left	left	visual	reach	1	arm	1	1	1	unknown	14	39	15	14	40	10	1.56	2.4
228501	Human	Human	male	601	Antje	female	2	5	1	TS	Towards	same	left	left	auditory	vocalization	1	arm	1	1	4	unknown	14	38	16	14	39	8	0.6	1.32	verbal ref (da)
228501	Human	Human	male	601	Antje	female	2	5	1	TS	Towards	same	left	left	auditory	vocalization	1	arm	1	1	4	unknown	14	41	2	14	41	8	3.04	3.32
228501	Human	Human	male	601	Antje	female	2	5	1	TS	Towards	same	left	left	position	switch	1	arm	2	1	0	unknown	14	43	14	14	44	20	5.52	6.8
228501	Human	Human	male	601	Antje	female	2	5	1	TS	Towards	same	left	left	auditory	vocalization	1	arm	2	1	4	unknown	14	44	10	14	45	3	6.36	7.12
228501	Human	Human	male	601	Antje	female	2	5	1	TS	Towards	same	left	left	position	switch	2	arm	2	1	0	unknown	14	44	21	14	46	14	6.8	8.56
228501	Human	Human	male	601	Antje	female	2	5	1	TS	Towards	same	left	left	position	turn	2	arm	1	1	0	unknown	14	46	15	14	48	6	8.56	10.24
228501	Human	Human	male	601	Antje	female	2	5	1	TS	Towards	same	left	left	auditory	vocalization	2	arm	1	1	4	unknown	14	47	14	14	48	1	9.52	10.04
228501	Human	Human	male	601	Antje	female	2	5	1	TS	Towards	same	left	left	position	switch	1	close	1	1	0	unknown	14	48	7	14	50	0	10.24	12
228501	Human	Human	male	601	Antje	female	2	5	1	TS	Towards	same	left	left	position	turn	1	close	2	1	0	unknown	14	50	1	14	51	0	12	13
228501	Human	Human	male	601	Antje	female	2	5	1	TS	Towards	same	left	left	auditory	vocalization	1	close	2	1	4	unknown	14	50	6	14	50	17	12.2	12.68	verbal ref (da)
228501	Human	Human	male	601	Antje	female	2	5	1	TS	Towards	same	left	left	position	switch	2	arm	2	1	0	unknown	14	51	1	14	52	13	13	14.52
228501	Human	Human	male	601	Antje	female	2	5	1	TS	Towards	same	left	left	auditory	vocalization	2	arm	2	1	4	unknown	14	51	4	14	51	18	13.12	13.72	verbal ref (da?)
228501	Human	Human	male	601	Antje	female	2	5	1	TS	Towards	same	left	left	position	turn	2	arm	1	1	0	unknown	14	52	14	14	53	19	14.52	15.76
228501	Human	Human	male	601	Antje	female	2	5	1	TS	Towards	same	left	left	auditory	vocalization	2	arm	1	1	4	unknown	14	52	22	14	53	11	14.84	15.44	verbal ref (da?)
228501	Human	Human	male	601	Antje	female	2	5	1	TS	Towards	same	left	left	position	switch	1	arm	1	1	0	unknown	14	53	20	14	55	13	15.76	17.52
228501	Human	Human	male	601	Antje	female	2	5	1	TS	Towards	same	left	left	visual	point	1	arm	1	1	1	unknown	14	55	3	14	55	10	17.08	17.4
228501	Human	Human	male	601	Antje	female	2	5	1	TS	Towards	same	left	left	auditory	vocalization	1	arm	1	1	4	unknown	14	55	4	14	55	18	17.12	17.72	verbal ref (da?)
228501	Human	Human	male	601	Antje	female	2	5	1	TS	Towards	same	left	left	position	switch	2	arm	2	1	0	unknown	14	55	14	14	57	0	17.52	19
228501	Human	Human	male	601	Antje	female	2	5	1	TS	Towards	same	left	left	position	turn	2	arm	1	1	0	unknown	14	57	1	14	58	0	19	20
228501	Human	Human	male	601	Antje	female	2	5	1	TS	Towards	same	left	left	auditory	vocalization	2	arm	1	1	4	unknown	14	57	15	14	58	0	19.56	20	verbal ref (da?)
228501	Human	Human	male	601	Antje	female	2	6	2	TD	Towards	different	right	left	position	start	1	arm	1	1	0	unknown	17	12	13	17	14	15	0	2.12
228501	Human	Human	male	601	Antje	female	2	6	2	TD	Towards	different	right	left	visual	point	1	arm	1	1	2	unknown	17	12	13	17	14	15	0	2.12
228501	Human	Human	male	601	Antje	female	2	6	2	TD	Towards	different	right	left	auditory	vocalization	1	arm	1	1	4	unknown	17	12	13	17	13	18	0	1.24	verbal ref (da)
228501	Human	Human	male	601	Antje	female	2	6	2	TD	Towards	different	right	left	auditory	vocalization	1	arm	1	1	4	unknown	17	14	11	17	14	23	1.92	2.44
228501	Human	Human	male	601	Antje	female	2	6	2	TD	Towards	different	right	left	position	turn	1	arm	2	1	0	unknown	17	14	16	17	15	24	2.12	3.48
228501	Human	Human	male	601	Antje	female	2	6	2	TD	Towards	different	right	left	auditory	vocalization	1	arm	2	1	4	unknown	17	15	0	17	15	15	2.48	3.12	verbal ref (da)
228501	Human	Human	male	601	Antje	female	2	6	2	TD	Towards	different	right	left	position	switch	2	arm	2	1	0	unknown	17	16	0	17	19	21	3.48	7.36
228501	Human	Human	male	601	Antje	female	2	6	2	TD	Towards	different	right	left	auditory	vocalization	2	arm	2	1	4	unknown	17	16	14	17	17	8	4.04	4.84	verbal ref (da)
228501	Human	Human	male	601	Antje	female	2	6	2	TD	Towards	different	right	left	visual	reach	2	arm	2	1	2	unknown	17	18	9	17	20	4	5.84	7.68
228501	Human	Human	male	601	Antje	female	2	6	2	TD	Towards	different	right	left	position	turn	2	arm	1	1	0	unknown	17	19	22	17	22	15	7.36	10.12
228501	Human	Human	male	601	Antje	female	2	6	2	TD	Towards	different	right	left	position	switch	1	arm	1	1	0	unknown	17	22	16	17	28	6	10.12	15.76
228501	Human	Human	male	601	Antje	female	2	6	2	TD	Towards	different	right	left	position	turn	1	arm	4	0	0	unknown	17	28	7	17	30	7	15.76	17.8
228501	Human	Human	male	601	Antje	female	2	6	2	TD	Towards	different	right	left	auditory	vocalization	2	arm	4	0	4	unknown	17	29	16	17	30	4	17.12	17.68
228501	Human	Human	male	601	Antje	female	2	6	2	TD	Towards	different	right	left	position	switch	2	close	4	0	0	unknown	17	30	8	17	30	17	17.8	18.2
228501	Human	Human	male	601	Antje	female	2	6	2	TD	Towards	different	right	left	visual	raise arm	2	close	4	0	4	unknown	17	30	9	17	32	2	17.84	19.6	right hand
228501	Human	Human	male	601	Antje	female	2	6	2	TD	Towards	different	right	left	position	leave	2	far	4	0	0	unknown	17	30	18	17	32	12	18.2	20
228501	Human	Human	male	601	Antje	female	2	6	2	TD	Towards	different	right	left	auditory	vocalization	2	far	4	0	4	unknown	17	31	18	17	32	12	19.2	20
228501	Human	Human	male	601	Antje	female	2	7	3	AS	Away	same	right	right	position	start	1	arm	1	1	0	unknown	19	30	2	19	37	0	0	6.96
228501	Human	Human	male	601	Antje	female	2	7	3	AS	Away	same	right	right	visual	reach	1	arm	1	1	1	unknown	19	31	6	19	34	14	1.16	4.52
228501	Human	Human	male	601	Antje	female	2	7	3	AS	Away	same	right	right	auditory	vocalization	1	arm	1	1	4	unknown	19	32	9	19	33	15	2.28	3.56
228501	Human	Human	male	601	Antje	female	2	7	3	AS	Away	same	right	right	auditory	vocalization	1	arm	1	1	4	unknown	19	35	6	19	35	15	5.16	5.56
228501	Human	Human	male	601	Antje	female	2	7	3	AS	Away	same	right	right	visual	reach	1	arm	1	1	1	unknown	19	36	8	19	37	13	6.24	7.48
228501	Human	Human	male	601	Antje	female	2	7	3	AS	Away	same	right	right	position	turn	1	arm	4	0	0	unknown	19	37	1	19	44	9	6.96	14.32
228501	Human	Human	male	601	Antje	female	2	7	3	AS	Away	same	right	right	auditory	vocalization	1	arm	4	0	4	unknown	19	38	2	19	38	22	8	8.84
228501	Human	Human	male	601	Antje	female	2	7	3	AS	Away	same	right	right	position	switch	2	far	4	0	0	unknown	19	44	10	19	50	1	14.32	20
222831	Human	Human	male	613	Heinz	male	1	1	2	TD	Towards	different	right	left	position	start	1	close	1	1	0	unknown	4	41	21	4	46	9	0	4.56
222831	Human	Human	male	613	Heinz	male	1	1	2	TD	Towards	different	right	left	visual	point	1	close	1	1	2	unknown	4	41	24	4	42	20	0.12	1
222831	Human	Human	male	613	Heinz	male	1	1	2	TD	Towards	different	right	left	auditory	vocalization	1	close	1	1	4	unknown	4	42	12	4	43	6	0.64	1.44
222831	Human	Human	male	613	Heinz	male	1	1	2	TD	Towards	different	right	left	position	turn	1	close	4	0	0	unknown	4	46	10	4	48	0	4.56	6.2
222831	Human	Human	male	613	Heinz	male	1	1	2	TD	Towards	different	right	left	position	leave	1	far	4	0	0	unknown	4	48	1	5	1	20	6.2	20
222831	Human	Human	male	613	Heinz	male	1	1	2	TD	Towards	different	right	left	action	touch	1	far	4	0	0	unknown	4	50	1	4	51	15	8.2	9.8	pling-machine
222831	Human	Human	male	613	Heinz	male	1	1	2	TD	Towards	different	right	left	action	touch	1	far	4	0	0	unknown	4	52	5	4	59	1	10.36	17.24	pling machine (point first)
222831	Human	Human	male	613	Heinz	male	1	1	2	TD	Towards	different	right	left	auditory	vocalization	1	far	4	0	4	unknown	4	52	19	4	53	6	10.92	11.44	verbal ref (da)
222831	Human	Human	male	613	Heinz	male	1	1	2	TD	Towards	different	right	left	auditory	vocalization	1	far	4	0	4	unknown	4	53	14	4	54	0	11.72	12.2	verbal ref (auf)
222831	Human	Human	male	613	Heinz	male	1	1	2	TD	Towards	different	right	left	auditory	vocalization	1	far	4	0	4	unknown	4	54	21	4	55	6	13	13.44
222831	Human	Human	male	613	Heinz	male	1	2	4	AD	Away	different	left	right	position	start	1	far	1	1	0	unknown	6	53	2	6	55	2	0	2.04
222831	Human	Human	male	613	Heinz	male	1	2	4	AD	Away	different	left	right	position	turn	1	far	4	0	0	unknown	6	55	3	7	10	23	2.04	17.88
222831	Human	Human	male	613	Heinz	male	1	2	4	AD	Away	different	left	right	position	switch	2	far	4	0	0	unknown	7	10	24	7	12	8	17.88	19.28
222831	Human	Human	male	613	Heinz	male	1	2	4	AD	Away	different	left	right	position	turn	2	far	2	1	0	unknown	7	12	9	7	13	1	19.28	20
222831	Human	Human	male	613	Heinz	male	1	3	1	TS	Towards	same	left	left	position	start	1	close	1	1	0	unknown	9	0	17	9	4	5	0	3.56
222831	Human	Human	male	613	Heinz	male	1	3	1	TS	Towards	same	left	left	position	switch	2	close	1	1	0	unknown	9	4	6	9	4	13	3.56	3.88
222831	Human	Human	male	613	Heinz	male	1	3	1	TS	Towards	same	left	left	position	turn	2	close	2	1	0	unknown	9	4	14	9	5	24	3.88	5.32
222831	Human	Human	male	613	Heinz	male	1	3	1	TS	Towards	same	left	left	position	leave	2	far	4	0	0	unknown	9	6	0	9	14	4	5.32	13.52
222831	Human	Human	male	613	Heinz	male	1	3	1	TS	Towards	same	left	left	visual	point	2	far	4	0	4	unknown	9	6	8	9	8	18	5.64	8.08	point (away); point to door
222831	Human	Human	male	613	Heinz	male	1	3	1	TS	Towards	same	left	left	auditory	vocalization	2	far	4	0	4	unknown	9	6	8	9	6	16	5.64	6	verbal ref (da)
222831	Human	Human	male	613	Heinz	male	1	3	1	TS	Towards	same	left	left	auditory	vocalization	2	far	4	0	4	unknown	9	7	8	9	7	22	6.64	7.24
222831	Human	Human	male	613	Heinz	male	1	3	1	TS	Towards	same	left	left	auditory	vocalization	2	far	4	0	4	unknown	9	12	3	9	12	11	11.44	11.8
222831	Human	Human	male	613	Heinz	male	1	3	1	TS	Towards	same	left	left	position	turn	2	far	1	1	0	unknown	9	14	5	9	15	16	13.52	15
222831	Human	Human	male	613	Heinz	male	1	3	1	TS	Towards	same	left	left	position	turn	2	far	4	0	0	unknown	9	15	17	9	20	16	15	20
222831	Human	Human	male	613	Heinz	male	1	3	1	TS	Towards	same	left	left	action	touch	2	far	4	0	0	unknown	9	17	2	9	18	21	16.4	18.2	pling-machine
222831	Human	Human	male	613	Heinz	male	1	3	1	TS	Towards	same	left	left	auditory	vocalization	2	far	4	0	4	unknown	9	18	17	9	19	0	18	18.36	verbal ref (da?)
222831	Human	Human	male	613	Heinz	male	1	3	1	TS	Towards	same	left	left	auditory	vocalization	2	far	4	0	4	unknown	9	19	6	9	19	13	18.56	18.88	verbal ref (hier?)
222831	Human	Human	male	613	Heinz	male	1	3	1	TS	Towards	same	left	left	action	touch	2	far	4	0	0	unknown	9	20	2	9	20	16	19.4	20
222831	Human	Human	male	613	Heinz	male	1	3	1	TS	Towards	same	left	left	auditory	vocalization	2	far	4	0	4	unknown	9	20	2	9	20	8	19.4	19.68	verbal ref (auf?)
222831	Human	Human	male	613	Heinz	male	1	4	3	AS	Away	same	right	right	position	start	1	arm	1	1	0	unknown	11	18	22	11	38	21	0	20
222831	Human	Human	male	613	Heinz	male	1	4	3	AS	Away	same	right	right	auditory	bang	1	arm	1	1	1	unknown	11	19	23	11	22	12	1.04	3.64	4x
222831	Human	Human	male	613	Heinz	male	1	4	3	AS	Away	same	right	right	auditory	vocalization	1	arm	1	1	4	unknown	11	22	16	11	23	10	3.76	4.56
222831	Human	Human	male	613	Heinz	male	1	4	3	AS	Away	same	right	right	auditory	bang	1	arm	1	1	1	both hands	11	25	1	11	25	13	6.16	6.68
222831	Human	Human	male	613	Heinz	male	1	4	3	AS	Away	same	right	right	auditory	bang	1	arm	1	1	1	unknown	11	26	22	11	34	8	8	15.48	15x
222831	Human	Human	male	613	Heinz	male	1	4	3	AS	Away	same	right	right	auditory	bang	1	arm	1	1	1	right hand	11	26	23	11	27	6	8.04	8.4
222831	Human	Human	male	613	Heinz	male	1	4	3	AS	Away	same	right	right	auditory	bang	1	arm	1	1	1	right hand	11	27	10	11	27	21	8.52	9
222831	Human	Human	male	613	Heinz	male	1	4	3	AS	Away	same	right	right	auditory	bang	1	arm	1	1	1	right hand	11	28	10	11	28	20	9.52	9.96
222831	Human	Human	male	613	Heinz	male	1	4	3	AS	Away	same	right	right	auditory	bang	1	arm	1	1	1	right hand	11	29	0	11	29	10	10.12	10.56
222831	Human	Human	male	613	Heinz	male	1	4	3	AS	Away	same	right	right	visual	point	1	arm	1	1	1	unknown	11	36	7	11	38	21	17.4	20
222831	Human	Human	male	613	Heinz	male	2	5	3	AS	Away	same	left	left	position	start	1	far	1	1	0	unknown	13	17	22	13	19	4	0	1.32
222831	Human	Human	male	613	Heinz	male	2	5	3	AS	Away	same	left	left	position	approach	1	arm	1	1	0	unknown	13	19	5	13	30	5	1.32	12.36
222831	Human	Human	male	613	Heinz	male	2	5	3	AS	Away	same	left	left	action	bang	1	arm	1	1	1	unknown	13	20	20	13	32	4	2.92	14.32	9x
222831	Human	Human	male	613	Heinz	male	2	5	3	AS	Away	same	left	left	position	turn	1	arm	4	0	0	unknown	13	30	6	13	36	9	12.36	18.52
222831	Human	Human	male	613	Heinz	male	2	5	3	AS	Away	same	left	left	position	turn	1	arm	1	1	0	unknown	13	36	10	13	37	21	18.52	20
222831	Human	Human	male	613	Heinz	male	2	6	1	TS	Towards	same	right	right	position	start	1	arm	1	1	0	unknown	15	22	0	15	24	19	0	2.8
222831	Human	Human	male	613	Heinz	male	2	6	1	TS	Towards	same	right	right	position	turn	1	arm	4	0	0	unknown	15	24	20	15	26	16	2.8	4.68
222831	Human	Human	male	613	Heinz	male	2	6	1	TS	Towards	same	right	right	position	leave	1	far	4	0	0	unknown	15	26	17	15	41	24	4.68	20
222831	Human	Human	male	613	Heinz	male	2	6	1	TS	Towards	same	right	right	action	touch	1	far	4	0	0	unknown	15	27	1	15	27	16	5.04	5.68	pling-machine
222831	Human	Human	male	613	Heinz	male	2	6	1	TS	Towards	same	right	right	action	touch	1	far	4	0	0	unknown	15	27	24	15	32	4	5.96	10.2	pling-machine
222831	Human	Human	male	613	Heinz	male	2	6	1	TS	Towards	same	right	right	auditory	vocalization	1	far	4	0	4	unknown	15	32	13	15	33	16	10.52	11.68
222831	Human	Human	male	613	Heinz	male	2	6	1	TS	Towards	same	right	right	action	touch	1	far	4	0	0	unknown	15	32	18	15	41	24	10.72	20	pling-machine
222831	Human	Human	male	613	Heinz	male	2	7	4	AD	Away	different	right	left	position	start	1	arm	1	1	0	unknown	18	7	13	18	12	18	0	5.24
222831	Human	Human	male	613	Heinz	male	2	7	4	AD	Away	different	right	left	position	turn	1	arm	4	0	0	unknown	18	12	19	18	14	22	5.24	7.4
222831	Human	Human	male	613	Heinz	male	2	7	4	AD	Away	different	right	left	position	leave	1	far	4	0	0	unknown	18	14	23	18	25	20	7.4	18.32
222831	Human	Human	male	613	Heinz	male	2	7	4	AD	Away	different	right	left	action	touch	1	far	4	0	0	unknown	18	15	19	18	17	8	8.24	9.84	pling-machine
222831	Human	Human	male	613	Heinz	male	2	7	4	AD	Away	different	right	left	action	touch	1	far	4	0	0	unknown	18	20	0	18	24	5	12.48	16.72	pling-machine
222831	Human	Human	male	613	Heinz	male	2	7	4	AD	Away	different	right	left	position	switch	2	far	4	0	0	unknown	18	25	21	18	27	12	18.32	20
222811	Human	Human	female	601	Heinz	male	1	1	4	AD	Away	different	right	left	position	start	1	close	1	1	0	unknown	6	0	4	6	2	23	0	2.8
222811	Human	Human	female	601	Heinz	male	1	1	4	AD	Away	different	right	left	position	turn	1	close	4	0	0	unknown	6	2	24	6	4	6	2.8	4.12
222811	Human	Human	female	601	Heinz	male	1	1	4	AD	Away	different	right	left	auditory	vocalization	1	close	4	0	4	unknown	6	4	0	6	4	14	3.84	4.44
222811	Human	Human	female	601	Heinz	male	1	1	4	AD	Away	different	right	left	position	leave	1	far	4	0	0	unknown	6	4	7	6	5	20	4.12	5.68
222811	Human	Human	female	601	Heinz	male	1	1	4	AD	Away	different	right	left	position	switch	2	far	4	0	0	unknown	6	5	21	6	12	20	5.68	12.68
222811	Human	Human	female	601	Heinz	male	1	1	4	AD	Away	different	right	left	auditory	vocalization	2	far	4	0	4	unknown	6	6	5	6	7	6	6.04	7.12
222811	Human	Human	female	601	Heinz	male	1	1	4	AD	Away	different	right	left	auditory	vocalization	2	far	4	0	4	unknown	6	8	17	6	9	17	8.52	9.56
222811	Human	Human	female	601	Heinz	male	1	1	4	AD	Away	different	right	left	auditory	vocalization	2	far	4	0	4	unknown	6	10	12	6	11	9	10.32	11.24
222811	Human	Human	female	601	Heinz	male	1	1	4	AD	Away	different	right	left	auditory	vocalization	2	far	4	0	4	unknown	6	11	21	6	12	11	11.68	12.32
222811	Human	Human	female	601	Heinz	male	1	1	4	AD	Away	different	right	left	position	turn	2	far	2	1	0	unknown	6	12	21	6	15	1	12.68	14.92
222811	Human	Human	female	601	Heinz	male	1	1	4	AD	Away	different	right	left	position	turn	2	far	4	0	0	unknown	6	15	2	6	20	3	14.92	20
222811	Human	Human	female	601	Heinz	male	1	1	4	AD	Away	different	right	left	auditory	vocalization	2	far	4	0	4	unknown	6	15	10	6	16	7	15.24	16.16	verbal (mami)
222811	Human	Human	female	601	Heinz	male	1	1	4	AD	Away	different	right	left	auditory	vocalization	2	far	4	0	4	unknown	6	18	3	6	18	11	17.96	18.32
222811	Human	Human	female	601	Heinz	male	1	2	2	TD	Towards	different	left	right	position	start	1	arm	2	1	0	unknown	8	35	14	8	36	14	0	1.04
222811	Human	Human	female	601	Heinz	male	1	2	2	TD	Towards	different	left	right	visual	point	1	arm	2	1	2	unknown	8	36	12	8	42	13	0.92	7
222811	Human	Human	female	601	Heinz	male	1	2	2	TD	Towards	different	left	right	position	switch	2	arm	2	1	0	unknown	8	36	15	8	42	13	1.04	7
222811	Human	Human	female	601	Heinz	male	1	2	2	TD	Towards	different	left	right	auditory	vocalization	2	arm	2	1	4	unknown	8	36	15	8	37	2	1.04	1.56	verbal ref (hier)
222811	Human	Human	female	601	Heinz	male	1	2	2	TD	Towards	different	left	right	auditory	vocalization	2	arm	2	1	4	unknown	8	37	20	8	38	5	2.24	2.68	verbal ref (hier)
222811	Human	Human	female	601	Heinz	male	1	2	2	TD	Towards	different	left	right	auditory	vocalization	2	arm	2	1	4	unknown	8	40	12	8	41	1	4.92	5.52	verbal ref (hier)
222811	Human	Human	female	601	Heinz	male	1	2	2	TD	Towards	different	left	right	auditory	vocalization	2	arm	2	1	4	unknown	8	41	15	8	42	4	6.04	6.64	verbal ref (hier)
222811	Human	Human	female	601	Heinz	male	1	2	2	TD	Towards	different	left	right	position	turn	2	arm	4	0	0	unknown	8	42	14	8	43	14	7	8.04
222811	Human	Human	female	601	Heinz	male	1	2	2	TD	Towards	different	left	right	auditory	vocalization	2	arm	4	0	4	unknown	8	42	17	8	43	4	7.12	7.64	verbal ref (hier)
222811	Human	Human	female	601	Heinz	male	1	2	2	TD	Towards	different	left	right	position	leave	2	close	4	0	0	unknown	8	43	15	8	44	5	8.04	8.68
222811	Human	Human	female	601	Heinz	male	1	2	2	TD	Towards	different	left	right	auditory	vocalization	2	close	4	0	4	unknown	8	43	15	8	45	10	8.04	9.88
222811	Human	Human	female	601	Heinz	male	1	2	2	TD	Towards	different	left	right	position	switch	1	far	4	0	0	unknown	8	44	6	8	55	13	8.68	20
222811	Human	Human	female	601	Heinz	male	1	2	2	TD	Towards	different	left	right	auditory	vocalization	1	far	4	0	4	unknown	8	46	21	8	48	0	11.28	12.48	verbal (mama?)
222811	Human	Human	female	601	Heinz	male	1	2	2	TD	Towards	different	left	right	auditory	vocalization	1	far	4	0	4	unknown	8	48	11	8	49	10	12.88	13.88	verbal (mama?)
222811	Human	Human	female	601	Heinz	male	1	3	3	AS	Away	same	left	left	position	start	1	arm	1	1	0	unknown	11	24	14	11	25	20	0	1.28
222811	Human	Human	female	601	Heinz	male	1	3	3	AS	Away	same	left	left	auditory	bang	1	arm	1	1	1	unknown	11	24	14	11	25	1	0	0.52	2x
222811	Human	Human	female	601	Heinz	male	1	3	3	AS	Away	same	left	left	position	turn	1	arm	4	0	0	unknown	11	25	21	11	27	14	1.28	3.04
222811	Human	Human	female	601	Heinz	male	1	3	3	AS	Away	same	left	left	auditory	vocalization	1	arm	4	0	4	unknown	11	27	9	11	27	24	2.8	3.44
222811	Human	Human	female	601	Heinz	male	1	3	3	AS	Away	same	left	left	position	turn	1	arm	1	1	0	unknown	11	27	15	11	30	19	3.04	6.24
222811	Human	Human	female	601	Heinz	male	1	3	3	AS	Away	same	left	left	auditory	bang	1	arm	1	1	1	unknown	11	28	3	11	31	9	3.56	6.84	7x
222811	Human	Human	female	601	Heinz	male	1	3	3	AS	Away	same	left	left	position	turn	1	arm	4	0	0	unknown	11	30	20	11	32	18	6.24	8.2
222811	Human	Human	female	601	Heinz	male	1	3	3	AS	Away	same	left	left	position	turn	1	arm	1	1	0	unknown	11	32	19	11	43	17	8.2	19.16
222811	Human	Human	female	601	Heinz	male	1	3	3	AS	Away	same	left	left	auditory	bang	1	arm	1	1	1	unknown	11	34	16	11	42	20	10.08	18.28	15x
222811	Human	Human	female	601	Heinz	male	1	3	3	AS	Away	same	left	left	position	turn	1	arm	4	0	0	unknown	11	43	18	11	44	13	19.16	20
222811	Human	Human	female	601	Heinz	male	1	4	1	TS	Towards	same	right	right	position	start	1	far	4	0	0	unknown	13	34	13	13	36	1	0	1.56
222811	Human	Human	female	601	Heinz	male	1	4	1	TS	Towards	same	right	right	position	turn	1	far	1	1	0	unknown	13	36	2	13	37	10	1.56	2.92
222811	Human	Human	female	601	Heinz	male	1	4	1	TS	Towards	same	right	right	position	turn	1	far	4	0	0	unknown	13	37	11	13	37	23	2.92	3.44
222811	Human	Human	female	601	Heinz	male	1	4	1	TS	Towards	same	right	right	position	switch	2	far	4	0	0	unknown	13	37	24	13	54	12	3.44	20
222811	Human	Human	female	601	Heinz	male	1	4	1	TS	Towards	same	right	right	auditory	vocalization	2	far	4	0	4	unknown	13	37	24	13	39	21	3.44	5.36
222811	Human	Human	female	601	Heinz	male	2	5	1	TS	Towards	same	left	left	position	start	1	arm	1	1	0	unknown	15	26	6	15	34	16	0	8.44
222811	Human	Human	female	601	Heinz	male	2	5	1	TS	Towards	same	left	left	visual	point	1	arm	1	1	1	unknown	15	26	6	15	31	0	0	4.8
222811	Human	Human	female	601	Heinz	male	2	5	1	TS	Towards	same	left	left	auditory	vocalization	1	arm	1	1	4	unknown	15	26	8	15	26	16	0.08	0.44	verbal ref (hier)
222811	Human	Human	female	601	Heinz	male	2	5	1	TS	Towards	same	left	left	auditory	vocalization	1	arm	1	1	4	unknown	15	27	15	15	28	1	1.36	1.84	verbal ref (hier)
222811	Human	Human	female	601	Heinz	male	2	5	1	TS	Towards	same	left	left	auditory	vocalization	1	arm	1	1	4	unknown	15	28	20	15	29	7	2.56	3.08	verbal ref (hier)
222811	Human	Human	female	601	Heinz	male	2	5	1	TS	Towards	same	left	left	auditory	vocalization	1	arm	1	1	4	unknown	15	30	15	15	31	6	4.36	5.04	verbal ref (hier)
222811	Human	Human	female	601	Heinz	male	2	5	1	TS	Towards	same	left	left	auditory	vocalization	1	arm	1	1	4	unknown	15	31	13	15	32	0	5.28	5.8	verbal ref (hier)
222811	Human	Human	female	601	Heinz	male	2	5	1	TS	Towards	same	left	left	auditory	bang	1	arm	1	1	1	unknown	15	32	3	15	34	18	5.88	8.52	5x
222811	Human	Human	female	601	Heinz	male	2	5	1	TS	Towards	same	left	left	position	turn	1	arm	4	0	0	unknown	15	34	17	15	36	19	8.44	10.56
222811	Human	Human	female	601	Heinz	male	2	5	1	TS	Towards	same	left	left	position	turn	1	arm	1	1	0	unknown	15	36	20	15	46	5	10.56	20
222811	Human	Human	female	601	Heinz	male	2	5	1	TS	Towards	same	left	left	auditory	bang	1	arm	1	1	1	unknown	15	37	7	15	39	5	11.04	13	3x
222811	Human	Human	female	601	Heinz	male	2	5	1	TS	Towards	same	left	left	auditory	vocalization	1	arm	1	1	4	unknown	15	39	24	15	41	10	13.72	15.2
222811	Human	Human	female	601	Heinz	male	2	6	3	AS	Away	same	right	right	position	start	1	arm	1	1	0	unknown	18	46	22	18	57	21	0	11
222811	Human	Human	female	601	Heinz	male	2	6	3	AS	Away	same	right	right	position	turn	1	arm	4	0	0	unknown	18	57	22	18	59	2	11	12.24
222811	Human	Human	female	601	Heinz	male	2	6	3	AS	Away	same	right	right	position	switch	2	close	4	0	0	unknown	18	59	3	19	0	9	12.24	13.52
222811	Human	Human	female	601	Heinz	male	2	6	3	AS	Away	same	right	right	position	leave	2	far	4	0	0	unknown	19	0	10	19	6	21	13.52	20
222811	Human	Human	female	601	Heinz	male	2	7	2	TD	Towards	different	right	left	position	start	2	arm	1	1	0	unknown	20	31	12	20	32	20	0	1.36
222811	Human	Human	female	601	Heinz	male	2	7	2	TD	Towards	different	right	left	visual	point	2	arm	1	1	2	unknown	20	31	12	20	37	17	0	6.24
222811	Human	Human	female	601	Heinz	male	2	7	2	TD	Towards	different	right	left	position	turn	2	arm	2	1	0	unknown	20	32	21	20	36	21	1.36	5.4
222811	Human	Human	female	601	Heinz	male	2	7	2	TD	Towards	different	right	left	auditory	vocalization	2	arm	2	1	4	unknown	20	32	21	20	33	9	1.36	1.92	verbal ref (hier)
222811	Human	Human	female	601	Heinz	male	2	7	2	TD	Towards	different	right	left	auditory	vocalization	2	arm	2	1	4	unknown	20	34	0	20	34	9	2.52	2.92	verbal ref (hier)
222811	Human	Human	female	601	Heinz	male	2	7	2	TD	Towards	different	right	left	position	turn	2	arm	4	0	0	unknown	20	36	22	20	39	11	5.4	8
222811	Human	Human	female	601	Heinz	male	2	7	2	TD	Towards	different	right	left	visual	point	2	arm	4	0	4	unknown	20	37	9	20	38	0	5.88	6.56	point (away); point to pling-machine
222811	Human	Human	female	601	Heinz	male	2	7	2	TD	Towards	different	right	left	auditory	vocalization	2	arm	4	0	4	unknown	20	38	16	20	39	2	7.16	7.64
222811	Human	Human	female	601	Heinz	male	2	7	2	TD	Towards	different	right	left	position	leave	2	far	4	0	0	unknown	20	39	12	20	51	11	8	20
222811	Human	Human	female	601	Heinz	male	2	7	2	TD	Towards	different	right	left	visual	point	2	far	4	0	4	unknown	20	39	12	20	43	6	8	11.8	point (away); point to pling-machine
222811	Human	Human	female	601	Heinz	male	2	7	2	TD	Towards	different	right	left	auditory	vocalization	2	far	4	0	4	unknown	20	39	20	20	40	2	8.32	8.64	verbal ref (da)
222811	Human	Human	female	601	Heinz	male	2	7	2	TD	Towards	different	right	left	action	touch	2	far	4	0	4	unknown	20	43	23	20	45	21	12.44	14.4	4x
222811	Human	Human	female	601	Heinz	male	2	7	2	TD	Towards	different	right	left	auditory	vocalization	2	far	4	0	4	unknown	20	44	5	20	45	3	12.72	13.68	verbal ref (hier da)
222811	Human	Human	female	601	Heinz	male	2	7	2	TD	Towards	different	right	left	auditory	bang	2	far	4	0	4	unknown	20	47	2	20	49	23	15.6	18.48	pling-machine
222811	Human	Human	female	601	Heinz	male	2	7	2	TD	Towards	different	right	left	auditory	vocalization	2	far	4	0	4	unknown	20	49	9	20	49	18	17.88	18.28
222811	Human	Human	female	601	Heinz	male	2	8	4	AD	Away	different	left	right	position	start	2	arm	2	1	0	unknown	22	26	7	22	37	7	0	11.04
222811	Human	Human	female	601	Heinz	male	2	8	4	AD	Away	different	left	right	auditory	bang	2	arm	2	1	2	both hands	22	37	4	22	37	13	10.88	11.28
222811	Human	Human	female	601	Heinz	male	2	8	4	AD	Away	different	left	right	position	turn	2	arm	4	0	0	unknown	22	37	8	22	39	12	11.04	13.24
222811	Human	Human	female	601	Heinz	male	2	8	4	AD	Away	different	left	right	position	turn	2	arm	2	1	0	unknown	22	39	13	22	43	2	13.24	16.84
222811	Human	Human	female	601	Heinz	male	2	8	4	AD	Away	different	left	right	auditory	bang	2	arm	2	1	2	right hand	22	39	21	22	41	20	13.56	15.56	5x
222811	Human	Human	female	601	Heinz	male	2	8	4	AD	Away	different	left	right	position	turn	2	arm	4	0	0	unknown	22	43	3	22	45	6	16.84	19
222811	Human	Human	female	601	Heinz	male	2	8	4	AD	Away	different	left	right	position	turn	2	arm	2	1	0	unknown	22	45	7	22	46	6	19	20
224591	Human	Human	male	620	Astrid	female	1	1	2	TD	Towards	different	left	right	position	start	2	far	1	1	0	unknown	4	43	17	4	44	0	0	0.36
224591	Human	Human	male	620	Astrid	female	1	1	2	TD	Towards	different	left	right	action	touch	2	far	1	1	0	unknown	4	43	17	4	47	0	0	3.36	pling-machine
224591	Human	Human	male	620	Astrid	female	1	1	2	TD	Towards	different	left	right	position	turn	2	far	4	0	0	unknown	4	44	1	4	46	24	0.36	3.32
224591	Human	Human	male	620	Astrid	female	1	1	2	TD	Towards	different	left	right	position	turn	2	far	1	1	0	unknown	4	47	0	4	50	8	3.32	6.68
224591	Human	Human	male	620	Astrid	female	1	1	2	TD	Towards	different	left	right	auditory	vocalization	2	far	1	1	4	unknown	4	47	6	4	47	13	3.56	3.88
224591	Human	Human	male	620	Astrid	female	1	1	2	TD	Towards	different	left	right	visual	empty hands	2	far	1	1	4	unknown	4	47	14	4	52	9	3.88	8.72
224591	Human	Human	male	620	Astrid	female	1	1	2	TD	Towards	different	left	right	auditory	vocalization	2	far	1	1	4	unknown	4	49	10	4	49	19	5.72	6.12
224591	Human	Human	male	620	Astrid	female	1	1	2	TD	Towards	different	left	right	position	switch	1	close	1	1	0	unknown	4	50	9	4	51	16	6.68	8
224591	Human	Human	male	620	Astrid	female	1	1	2	TD	Towards	different	left	right	auditory	vocalization	1	close	1	1	4	unknown	4	50	16	4	50	24	6.96	7.32
224591	Human	Human	male	620	Astrid	female	1	1	2	TD	Towards	different	left	right	position	turn	1	close	4	0	0	unknown	4	51	17	4	53	7	8	9.64
224591	Human	Human	male	620	Astrid	female	1	1	2	TD	Towards	different	left	right	auditory	vocalization	1	close	4	0	4	unknown	4	52	6	4	52	12	8.56	8.84
224591	Human	Human	male	620	Astrid	female	1	1	2	TD	Towards	different	left	right	visual	raise arm	1	close	4	0	4	unknown	4	52	9	4	53	9	8.68	9.72
224591	Human	Human	male	620	Astrid	female	1	1	2	TD	Towards	different	left	right	position	switch	2	far	4	0	0	unknown	4	53	8	4	55	6	9.64	11.6
224591	Human	Human	male	620	Astrid	female	1	1	2	TD	Towards	different	left	right	position	turn	2	far	1	1	0	unknown	4	55	7	4	56	3	11.6	12.48
224591	Human	Human	male	620	Astrid	female	1	1	2	TD	Towards	different	left	right	position	turn	2	far	4	0	0	unknown	4	56	4	5	3	16	12.48	20
224591	Human	Human	male	620	Astrid	female	1	1	2	TD	Towards	different	left	right	action	touch	2	far	4	0	0	unknown	4	57	22	4	59	7	14.2	15.64	pling-machine
224591	Human	Human	male	620	Astrid	female	1	1	2	TD	Towards	different	left	right	auditory	vocalization	2	far	4	0	4	unknown	4	59	2	4	59	8	15.4	15.68
224591	Human	Human	male	620	Astrid	female	1	1	2	TD	Towards	different	left	right	action	touch	2	far	4	0	0	unknown	5	1	14	5	3	16	17.88	20	pling-machine
224591	Human	Human	male	620	Astrid	female	1	2	3	AS	Away	same	left	left	position	start	1	arm	1	1	0	unknown	6	35	18	6	44	14	0	8.88
224591	Human	Human	male	620	Astrid	female	1	2	3	AS	Away	same	left	left	visual	raise arm	1	arm	1	1	4	unknown	6	35	18	6	37	12	0	1.8
224591	Human	Human	male	620	Astrid	female	1	2	3	AS	Away	same	left	left	position	turn	1	arm	4	0	0	unknown	6	44	15	6	47	23	8.88	12.24
224591	Human	Human	male	620	Astrid	female	1	2	3	AS	Away	same	left	left	visual	empty hands	1	arm	4	0	4	unknown	6	45	20	6	47	11	10.08	11.76
224591	Human	Human	male	620	Astrid	female	1	2	3	AS	Away	same	left	left	auditory	vocalization	1	arm	4	0	4	unknown	6	45	23	6	46	8	10.2	10.64
224591	Human	Human	male	620	Astrid	female	1	2	3	AS	Away	same	left	left	auditory	vocalization	1	arm	4	0	4	unknown	6	46	19	6	47	4	11.04	11.48
224591	Human	Human	male	620	Astrid	female	1	2	3	AS	Away	same	left	left	visual	shrug	1	arm	4	0	4	unknown	6	47	12	6	48	20	11.76	13.12
224591	Human	Human	male	620	Astrid	female	1	2	3	AS	Away	same	left	left	position	leave	1	close	4	0	0	unknown	6	47	24	6	48	12	12.24	12.8
224591	Human	Human	male	620	Astrid	female	1	2	3	AS	Away	same	left	left	position	turn	1	close	1	1	0	unknown	6	48	13	6	50	6	12.8	14.56
224591	Human	Human	male	620	Astrid	female	1	2	3	AS	Away	same	left	left	visual	empty hands	1	close	1	1	4	unknown	6	48	21	6	53	20	13.12	18.12
224591	Human	Human	male	620	Astrid	female	1	2	3	AS	Away	same	left	left	position	turn	1	close	4	0	0	unknown	6	50	7	6	51	13	14.56	15.84
224591	Human	Human	male	620	Astrid	female	1	2	3	AS	Away	same	left	left	position	turn	1	close	1	1	0	unknown	6	51	14	6	53	13	15.84	17.84
224591	Human	Human	male	620	Astrid	female	1	2	3	AS	Away	same	left	left	position	turn	1	close	4	0	0	unknown	6	53	14	6	55	17	17.84	20
224591	Human	Human	male	620	Astrid	female	1	2	3	AS	Away	same	left	left	visual	shrug	1	close	4	0	4	unknown	6	53	24	6	55	17	18.24	20
224591	Human	Human	male	620	Astrid	female	1	3	1	TS	Towards	same	right	right	position	start	1	arm	1	1	0	unknown	8	18	14	8	36	13	0	18
224591	Human	Human	male	620	Astrid	female	1	3	1	TS	Towards	same	right	right	visual	point	1	arm	1	1	1	unknown	8	23	23	8	29	3	5.36	10.6
224591	Human	Human	male	620	Astrid	female	1	3	1	TS	Towards	same	right	right	visual	reach	1	arm	1	1	1	unknown	8	30	4	8	33	3	11.6	14.6
224591	Human	Human	male	620	Astrid	female	1	3	1	TS	Towards	same	right	right	visual	reach	1	arm	1	1	1	unknown	8	34	8	8	38	13	15.76	20
224591	Human	Human	male	620	Astrid	female	1	3	1	TS	Towards	same	right	right	position	turn	1	arm	4	0	0	unknown	8	36	14	8	38	13	18	20
224591	Human	Human	male	620	Astrid	female	1	4	4	AD	Away	different	right	left	position	start	1	arm	1	1	0	unknown	9	57	6	10	5	13	0	8.32
224591	Human	Human	male	620	Astrid	female	1	4	4	AD	Away	different	right	left	position	turn	1	arm	4	0	0	unknown	10	5	14	10	7	8	8.32	10.12
224591	Human	Human	male	620	Astrid	female	1	4	4	AD	Away	different	right	left	visual	empty hands	1	arm	4	0	4	unknown	10	6	0	10	10	18	8.76	13.52
224591	Human	Human	male	620	Astrid	female	1	4	4	AD	Away	different	right	left	auditory	vocalization	1	arm	4	0	4	unknown	10	6	0	10	6	7	8.76	9.08
224591	Human	Human	male	620	Astrid	female	1	4	4	AD	Away	different	right	left	auditory	vocalization	1	arm	4	0	4	unknown	10	6	24	10	7	14	9.72	10.36
224591	Human	Human	male	620	Astrid	female	1	4	4	AD	Away	different	right	left	position	leave	1	far	4	0	0	unknown	10	7	9	10	11	7	10.12	14.08
224591	Human	Human	male	620	Astrid	female	1	4	4	AD	Away	different	right	left	auditory	vocalization	1	far	4	0	4	unknown	10	8	2	10	8	12	10.84	11.28
224591	Human	Human	male	620	Astrid	female	1	4	4	AD	Away	different	right	left	auditory	vocalization	1	far	4	0	4	unknown	10	8	17	10	9	4	11.44	11.96
224591	Human	Human	male	620	Astrid	female	1	4	4	AD	Away	different	right	left	visual	shrug	1	far	4	0	4	unknown	10	10	19	10	12	5	13.52	15
224591	Human	Human	male	620	Astrid	female	1	4	4	AD	Away	different	right	left	position	turn	1	far	1	1	0	unknown	10	11	8	10	13	16	14.08	16.44
224591	Human	Human	male	620	Astrid	female	1	4	4	AD	Away	different	right	left	visual	empty hands	1	far	1	1	4	unknown	10	12	13	10	15	2	15.28	17.88
224591	Human	Human	male	620	Astrid	female	1	4	4	AD	Away	different	right	left	auditory	vocalization	1	far	1	1	4	unknown	10	13	16	10	14	2	16.4	16.88
224591	Human	Human	male	620	Astrid	female	1	4	4	AD	Away	different	right	left	position	turn	1	far	4	0	0	unknown	10	13	17	10	15	19	16.44	18.56
224591	Human	Human	male	620	Astrid	female	1	4	4	AD	Away	different	right	left	position	turn	1	far	1	1	0	unknown	10	15	20	10	17	5	18.56	20
224591	Human	Human	male	620	Astrid	female	2	5	4	AD	Away	different	left	right	position	start	2	far	1	1	0	unknown	12	5	19	12	7	22	0	2.16
224591	Human	Human	male	620	Astrid	female	2	5	4	AD	Away	different	left	right	action	touch	2	far	1	1	0	unknown	12	5	19	12	8	4	0	2.44	pling-machine
224591	Human	Human	male	620	Astrid	female	2	5	4	AD	Away	different	left	right	position	turn	2	far	4	0	0	unknown	12	7	23	12	11	5	2.16	5.48
224591	Human	Human	male	620	Astrid	female	2	5	4	AD	Away	different	left	right	visual	empty hands	2	far	4	0	4	unknown	12	8	5	12	15	19	2.44	10.04
224591	Human	Human	male	620	Astrid	female	2	5	4	AD	Away	different	left	right	auditory	vocalization	2	far	4	0	4	unknown	12	8	8	12	8	19	2.56	3.04
224591	Human	Human	male	620	Astrid	female	2	5	4	AD	Away	different	left	right	auditory	vocalization	2	far	4	0	4	unknown	12	10	11	12	10	18	4.68	5
224591	Human	Human	male	620	Astrid	female	2	5	4	AD	Away	different	left	right	position	turn	2	far	1	1	0	unknown	12	11	6	12	13	22	5.48	8.16
224591	Human	Human	male	620	Astrid	female	2	5	4	AD	Away	different	left	right	position	turn	2	far	4	0	0	unknown	12	13	23	12	15	19	8.16	10.04
224591	Human	Human	male	620	Astrid	female	2	5	4	AD	Away	different	left	right	auditory	vocalization	2	far	4	0	4	unknown	12	15	0	12	15	11	9.24	9.72
224591	Human	Human	male	620	Astrid	female	2	5	4	AD	Away	different	left	right	position	turn	2	far	1	1	0	unknown	12	15	20	12	17	10	10.04	11.68
224591	Human	Human	male	620	Astrid	female	2	5	4	AD	Away	different	left	right	auditory	body slap	2	far	1	1	4	both hands	12	15	20	12	17	20	10.04	12.08	2x
224591	Human	Human	male	620	Astrid	female	2	5	4	AD	Away	different	left	right	auditory	vocalization	2	far	1	1	4	unknown	12	16	6	12	16	14	10.48	10.84
224591	Human	Human	male	620	Astrid	female	2	5	4	AD	Away	different	left	right	position	turn	2	far	2	1	0	unknown	12	17	11	12	19	24	11.68	14.24
224591	Human	Human	male	620	Astrid	female	2	5	4	AD	Away	different	left	right	position	turn	2	far	1	1	0	unknown	12	20	0	12	25	3	14.24	19.4
224591	Human	Human	male	620	Astrid	female	2	5	4	AD	Away	different	left	right	position	turn	2	far	4	0	0	unknown	12	25	4	12	25	18	19.4	20
224591	Human	Human	male	620	Astrid	female	2	5	4	AD	Away	different	left	right	visual	empty hands	2	far	4	0	4	unknown	12	25	4	12	25	18	19.4	20
224591	Human	Human	male	620	Astrid	female	2	6	1	TS	Towards	same	left	left	position	start	1	close	1	1	0	unknown	14	30	20	14	35	16	0	4.88
224591	Human	Human	male	620	Astrid	female	2	6	1	TS	Towards	same	left	left	visual	empty hands	1	close	1	1	4	unknown	14	30	20	14	34	18	0	3.96
224591	Human	Human	male	620	Astrid	female	2	6	1	TS	Towards	same	left	left	auditory	vocalization	1	close	1	1	4	unknown	14	33	21	14	34	7	3.04	3.52
224591	Human	Human	male	620	Astrid	female	2	6	1	TS	Towards	same	left	left	position	turn	1	close	2	1	0	unknown	14	35	17	14	36	24	4.88	6.2
224591	Human	Human	male	620	Astrid	female	2	6	1	TS	Towards	same	left	left	position	turn	1	close	1	1	0	unknown	14	37	0	14	39	8	6.2	8.56
224591	Human	Human	male	620	Astrid	female	2	6	1	TS	Towards	same	left	left	position	turn	1	close	4	0	0	unknown	14	39	9	14	44	8	8.56	13.56
224591	Human	Human	male	620	Astrid	female	2	6	1	TS	Towards	same	left	left	position	turn	1	close	1	1	0	unknown	14	44	9	14	50	19	13.56	20
224591	Human	Human	male	620	Astrid	female	2	6	1	TS	Towards	same	left	left	visual	empty hands	1	close	1	1	4	unknown	14	46	0	14	48	14	15.2	17.8
224591	Human	Human	male	620	Astrid	female	2	6	1	TS	Towards	same	left	left	auditory	vocalization	1	close	1	1	4	unknown	14	46	0	14	46	9	15.2	15.6
224591	Human	Human	male	620	Astrid	female	2	6	1	TS	Towards	same	left	left	auditory	vocalization	1	close	1	1	4	unknown	14	47	6	14	47	13	16.44	16.76
224591	Human	Human	male	620	Astrid	female	2	7	3	AS	Away	same	right	right	position	start	1	arm	1	1	0	unknown	16	45	0	16	51	12	0	6.52
224591	Human	Human	male	620	Astrid	female	2	7	3	AS	Away	same	right	right	position	turn	1	arm	4	0	0	unknown	16	51	13	16	53	14	6.52	8.6
224591	Human	Human	male	620	Astrid	female	2	7	3	AS	Away	same	right	right	auditory	vocalization	1	arm	4	0	4	unknown	16	52	4	16	53	18	7.16	8.76
224591	Human	Human	male	620	Astrid	female	2	7	3	AS	Away	same	right	right	visual	empty hands	1	arm	4	0	4	unknown	16	52	12	16	56	1	7.48	11.08
224591	Human	Human	male	620	Astrid	female	2	7	3	AS	Away	same	right	right	position	leave	1	far	4	0	0	unknown	16	53	15	16	53	24	8.6	9
224591	Human	Human	male	620	Astrid	female	2	7	3	AS	Away	same	right	right	position	turn	1	far	1	1	0	unknown	16	54	0	16	56	0	9	11.04
224591	Human	Human	male	620	Astrid	female	2	7	3	AS	Away	same	right	right	position	turn	1	far	4	0	0	unknown	16	56	1	16	59	19	11.04	14.8
224591	Human	Human	male	620	Astrid	female	2	7	3	AS	Away	same	right	right	auditory	vocalization	1	far	4	0	4	unknown	16	56	9	16	56	19	11.36	11.8
224591	Human	Human	male	620	Astrid	female	2	7	3	AS	Away	same	right	right	position	turn	1	far	1	1	0	unknown	16	59	20	17	4	1	14.8	19.08
224591	Human	Human	male	620	Astrid	female	2	7	3	AS	Away	same	right	right	position	turn	1	far	4	0	0	unknown	17	4	2	17	4	24	19.08	20
224591	Human	Human	male	620	Astrid	female	2	7	3	AS	Away	same	right	right	visual	empty hands	1	far	4	0	4	unknown	17	4	15	17	4	24	19.6	20
224591	Human	Human	male	620	Astrid	female	2	7	3	AS	Away	same	right	right	auditory	vocalization	1	far	4	0	4	unknown	17	4	18	17	4	24	19.72	20
224591	Human	Human	male	620	Astrid	female	2	8	2	TD	Towards	different	right	left	position	start	1	far	4	0	0	unknown	19	25	5	19	30	11	0	5.28
224591	Human	Human	male	620	Astrid	female	2	8	2	TD	Towards	different	right	left	visual	empty hands	1	far	4	0	4	unknown	19	25	5	19	25	16	0	0.48
224591	Human	Human	male	620	Astrid	female	2	8	2	TD	Towards	different	right	left	action	touch	1	far	4	0	0	unknown	19	26	13	19	30	20	1.32	5.64	pling-machine
224591	Human	Human	male	620	Astrid	female	2	8	2	TD	Towards	different	right	left	auditory	vocalization	1	far	4	0	4	unknown	19	29	4	19	29	15	3.96	4.44
224591	Human	Human	male	620	Astrid	female	2	8	2	TD	Towards	different	right	left	position	turn	1	far	1	1	0	unknown	19	30	12	19	31	21	5.28	6.68
224591	Human	Human	male	620	Astrid	female	2	8	2	TD	Towards	different	right	left	position	turn	1	far	2	1	0	unknown	19	31	22	19	33	1	6.68	7.88
224591	Human	Human	male	620	Astrid	female	2	8	2	TD	Towards	different	right	left	auditory	vocalization	1	far	2	1	4	unknown	19	32	22	19	34	0	7.68	8.84
224591	Human	Human	male	620	Astrid	female	2	8	2	TD	Towards	different	right	left	position	switch	2	far	2	1	0	unknown	19	33	2	19	33	9	7.88	8.2
224591	Human	Human	male	620	Astrid	female	2	8	2	TD	Towards	different	right	left	position	turn	2	arm	4	0	0	unknown	19	33	10	19	34	19	8.2	9.6
224591	Human	Human	male	620	Astrid	female	2	8	2	TD	Towards	different	right	left	position	turn	2	arm	1	1	0	unknown	19	34	20	19	37	0	9.6	11.84
224591	Human	Human	male	620	Astrid	female	2	8	2	TD	Towards	different	right	left	position	switch	1	arm	1	1	0	unknown	19	37	1	19	42	21	11.84	17.68
224591	Human	Human	male	620	Astrid	female	2	8	2	TD	Towards	different	right	left	auditory	vocalization	1	arm	1	1	4	unknown	19	37	23	19	38	11	12.72	13.28
224591	Human	Human	male	620	Astrid	female	2	8	2	TD	Towards	different	right	left	position	turn	1	arm	4	0	0	unknown	19	42	22	19	44	0	17.68	18.84
224591	Human	Human	male	620	Astrid	female	2	8	2	TD	Towards	different	right	left	position	turn	1	close	2	1	0	unknown	19	44	1	19	44	19	18.84	19.6
224591	Human	Human	male	620	Astrid	female	2	8	2	TD	Towards	different	right	left	position	switch	2	close	2	1	0	unknown	19	44	20	19	45	4	19.6	20
230741	Human	Human	male	612	Heinz	male	1	1	1	TS	Towards	same	right	right	position	start	1	close	1	1	0	unknown	4	58	10	4	59	0	0	0.64
230741	Human	Human	male	612	Heinz	male	1	1	1	TS	Towards	same	right	right	position	approach	1	arm	1	1	0	unknown	4	59	1	5	6	20	0.64	8.44
230741	Human	Human	male	612	Heinz	male	1	1	1	TS	Towards	same	right	right	visual	point	1	arm	1	1	1	unknown	4	59	1	5	2	20	0.64	4.44
230741	Human	Human	male	612	Heinz	male	1	1	1	TS	Towards	same	right	right	auditory	vocalization	1	arm	1	1	4	unknown	4	59	10	5	0	1	1	1.68
230741	Human	Human	male	612	Heinz	male	1	1	1	TS	Towards	same	right	right	visual	point	1	arm	1	1	1	unknown	5	2	21	5	4	15	4.44	6.24	tap-point with extended index finger (4x)
230741	Human	Human	male	612	Heinz	male	1	1	1	TS	Towards	same	right	right	position	turn	1	arm	2	1	0	unknown	5	6	21	5	8	6	8.44	9.88
230741	Human	Human	male	612	Heinz	male	1	1	1	TS	Towards	same	right	right	position	switch	2	arm	2	1	0	unknown	5	8	7	5	10	18	9.88	12.36
230741	Human	Human	male	612	Heinz	male	1	1	1	TS	Towards	same	right	right	auditory	bang	2	arm	2	1	2	unknown	5	9	21	5	10	18	11.44	12.36	2x
230741	Human	Human	male	612	Heinz	male	1	1	1	TS	Towards	same	right	right	position	turn	2	arm	1	1	0	unknown	5	10	19	5	11	24	12.36	13.6
230741	Human	Human	male	612	Heinz	male	1	1	1	TS	Towards	same	right	right	position	switch	1	arm	1	1	0	unknown	5	12	0	5	18	9	13.6	20
230741	Human	Human	male	612	Heinz	male	1	1	1	TS	Towards	same	right	right	auditory	vocalization	1	arm	1	1	4	unknown	5	15	20	5	16	6	17.4	17.88
230741	Human	Human	male	612	Heinz	male	1	1	1	TS	Towards	same	right	right	auditory	vocalization	1	arm	1	1	4	unknown	5	17	20	5	18	9	19.4	20
230741	Human	Human	male	612	Heinz	male	1	2	2	TD	Towards	different	left	right	position	start	1	far	4	0	0	unknown	7	32	3	7	41	16	0	9.56
230741	Human	Human	male	612	Heinz	male	1	2	2	TD	Towards	different	left	right	auditory	vocalization	1	far	4	0	4	unknown	7	33	18	7	34	8	1.6	2.24
230741	Human	Human	male	612	Heinz	male	1	2	2	TD	Towards	different	left	right	action	touch	1	far	4	0	0	unknown	7	35	1	7	36	24	2.92	4.88	pling-machine
230741	Human	Human	male	612	Heinz	male	1	2	2	TD	Towards	different	left	right	auditory	vocalization	1	far	4	0	4	unknown	7	36	5	7	37	2	4.08	5
230741	Human	Human	male	612	Heinz	male	1	2	2	TD	Towards	different	left	right	auditory	vocalization	1	far	4	0	4	unknown	7	37	15	7	38	2	5.48	6
230741	Human	Human	male	612	Heinz	male	1	2	2	TD	Towards	different	left	right	action	touch	1	far	4	0	0	unknown	7	38	14	7	41	7	6.44	9.2	pling-machine
230741	Human	Human	male	612	Heinz	male	1	2	2	TD	Towards	different	left	right	auditory	vocalization	1	far	4	0	4	unknown	7	38	19	7	39	22	6.64	7.8
230741	Human	Human	male	612	Heinz	male	1	2	2	TD	Towards	different	left	right	position	switch	2	far	4	0	0	unknown	7	41	17	7	50	13	9.56	18.44
230741	Human	Human	male	612	Heinz	male	1	2	2	TD	Towards	different	left	right	auditory	vocalization	2	far	4	0	4	unknown	7	44	5	7	45	7	12.08	13.2
230741	Human	Human	male	612	Heinz	male	1	2	2	TD	Towards	different	left	right	action	touch	2	far	4	0	0	unknown	7	47	12	7	49	17	15.36	17.6	pling-machine
230741	Human	Human	male	612	Heinz	male	1	2	2	TD	Towards	different	left	right	auditory	vocalization	2	far	4	0	4	unknown	7	47	12	7	48	12	15.36	16.4
230741	Human	Human	male	612	Heinz	male	1	2	2	TD	Towards	different	left	right	auditory	vocalization	2	far	4	0	4	unknown	7	50	9	7	51	4	18.24	19.08	verbal (auto?)
230741	Human	Human	male	612	Heinz	male	1	2	2	TD	Towards	different	left	right	position	turn	2	far	1	1	0	unknown	7	50	14	7	52	0	18.44	19.92
230741	Human	Human	male	612	Heinz	male	1	2	2	TD	Towards	different	left	right	position	approach	2	close	2	1	0	unknown	7	52	1	7	52	2	19.92	20
230741	Human	Human	male	612	Heinz	male	1	3	3	AS	Away	same	left	left	position	start	2	close	1	1	0	unknown	9	42	12	9	42	18	0	0.28
230741	Human	Human	male	612	Heinz	male	1	3	3	AS	Away	same	left	left	position	switch	1	close	1	1	0	unknown	9	42	19	9	43	11	0.28	1
230741	Human	Human	male	612	Heinz	male	1	3	3	AS	Away	same	left	left	auditory	vocalization	1	close	1	1	4	unknown	9	43	3	9	43	17	0.64	1.24	verbal ref (hier)
230741	Human	Human	male	612	Heinz	male	1	3	3	AS	Away	same	left	left	position	approach	1	arm	1	1	0	unknown	9	43	12	9	48	18	1	6.28
230741	Human	Human	male	612	Heinz	male	1	3	3	AS	Away	same	left	left	auditory	vocalization	1	arm	1	1	4	unknown	9	46	22	9	47	10	4.4	4.96
230741	Human	Human	male	612	Heinz	male	1	3	3	AS	Away	same	left	left	position	turn	1	close	4	0	0	unknown	9	48	19	9	54	6	6.28	11.8
230741	Human	Human	male	612	Heinz	male	1	3	3	AS	Away	same	left	left	auditory	body slap	1	close	4	0	4	unknown	9	49	8	9	53	13	6.84	11.08	8x
230741	Human	Human	male	612	Heinz	male	1	3	3	AS	Away	same	left	left	position	leave	1	far	4	0	0	unknown	9	54	7	10	2	11	11.8	20
230741	Human	Human	male	612	Heinz	male	1	3	3	AS	Away	same	left	left	auditory	body slap	1	far	4	0	4	unknown	9	54	9	9	54	23	11.88	12.48
230741	Human	Human	male	612	Heinz	male	1	3	3	AS	Away	same	left	left	auditory	vocalization	1	far	4	0	4	unknown	9	57	9	9	58	12	14.88	16.04
230741	Human	Human	male	612	Heinz	male	1	3	3	AS	Away	same	left	left	action	touch	1	far	4	0	0	unknown	9	57	18	10	2	11	15.24	20
230741	Human	Human	male	612	Heinz	male	1	3	3	AS	Away	same	left	left	auditory	vocalization	1	far	4	0	4	unknown	9	59	21	10	0	10	17.36	17.96
230741	Human	Human	male	612	Heinz	male	1	3	3	AS	Away	same	left	left	auditory	vocalization	1	far	4	0	4	unknown	10	1	1	10	1	17	18.56	19.24
230741	Human	Human	male	612	Heinz	male	1	4	4	AD	Away	different	right	left	position	start	2	arm	2	1	0	unknown	11	45	24	11	57	22	0	11.96
230741	Human	Human	male	612	Heinz	male	1	4	4	AD	Away	different	right	left	position	switch	1	arm	1	1	0	unknown	11	57	23	12	0	5	11.96	14.28
230741	Human	Human	male	612	Heinz	male	1	4	4	AD	Away	different	right	left	position	switch	2	arm	2	1	0	unknown	12	0	6	12	5	23	14.28	20
230741	Human	Human	male	612	Heinz	male	2	5	4	AD	Away	different	left	right	position	start	1	far	1	1	0	unknown	13	51	16	13	52	2	0	0.48
230741	Human	Human	male	612	Heinz	male	2	5	4	AD	Away	different	left	right	position	turn	1	far	4	0	0	unknown	13	52	3	13	55	13	0.48	3.92
230741	Human	Human	male	612	Heinz	male	2	5	4	AD	Away	different	left	right	visual	raise arm	1	far	4	0	4	unknown	13	52	16	13	53	21	1	2.24
230741	Human	Human	male	612	Heinz	male	2	5	4	AD	Away	different	left	right	auditory	vocalization	1	far	4	0	4	unknown	13	52	16	13	53	4	1	1.56	verbal (mama)
230741	Human	Human	male	612	Heinz	male	2	5	4	AD	Away	different	left	right	position	turn	1	far	1	1	0	unknown	13	55	14	13	56	18	3.92	5.12
230741	Human	Human	male	612	Heinz	male	2	5	4	AD	Away	different	left	right	position	turn	1	far	2	1	0	unknown	13	56	19	13	57	20	5.12	6.2
230741	Human	Human	male	612	Heinz	male	2	5	4	AD	Away	different	left	right	position	turn	1	far	4	0	0	unknown	13	57	21	13	59	4	6.2	7.56
230741	Human	Human	male	612	Heinz	male	2	5	4	AD	Away	different	left	right	position	switch	2	far	4	0	0	unknown	13	59	5	14	11	15	7.56	20
230741	Human	Human	male	612	Heinz	male	2	5	4	AD	Away	different	left	right	auditory	vocalization	2	far	4	0	4	unknown	14	6	1	14	6	4	14.4	14.56
230741	Human	Human	male	612	Heinz	male	2	5	4	AD	Away	different	left	right	auditory	vocalization	2	far	4	0	4	unknown	14	9	15	14	9	20	17.96	18.2
Joey	Ape	Bonobo	male	9228	Sebastian	male	1	1	4	AD	Away	different	unknown	unknown	position	start	2	1	2	1	0	body	6	13	10	6	15	18	0	2.36
Joey	Ape	Bonobo	male	9228	Sebastian	male	1	1	4	AD	Away	different	unknown	unknown	position	switch	1	1	1	1	0	body	6	15	19	6	19	5	2.36	5.84
Joey	Ape	Bonobo	male	9228	Sebastian	male	1	1	4	AD	Away	different	unknown	unknown	position	switch	2	1	2	1	0	body	6	19	6	6	43	9	5.84	30
Joey	Ape	Bonobo	male	9228	Sebastian	male	1	1	4	AD	Away	different	unknown	unknown	auditory	bang	2	1	2	1	2	hand/right	6	35	1	6	36	15	21.64	23.24	3x
Joey	Ape	Bonobo	male	9228	Sebastian	male	1	2	2	TD	Towards	different	unknown	unknown	position	start	2	0	0	0	0	body	8	10	20	8	40	19	0	30
Joey	Ape	Bonobo	male	9228	Sebastian	male	1	2	2	TD	Towards	different	unknown	unknown	visual	point	2	1	2	1	2	Finger/right	8	14	1	8	14	14	3.24	3.8
Joey	Ape	Bonobo	male	9228	Sebastian	male	1	3	1	TS	Towards	same	unknown	unknown	position	start	1	0	0	0	0	body	9	59	3	10	29	2	0	30
Joey	Ape	Bonobo	male	9228	Sebastian	male	1	3	1	TS	Towards	same	unknown	unknown	visual	point	1	1	1	1	1	Finger/right	10	9	20	10	10	24	10.68	11.88
Joey	Ape	Bonobo	male	9228	Sebastian	male	1	3	1	TS	Towards	same	unknown	unknown	visual	point	1	1	1	1	1	Finger/right	10	11	7	10	12	2	12.16	13
Joey	Ape	Bonobo	male	9228	Sebastian	male	1	3	1	TS	Towards	same	unknown	unknown	visual	point	1	1	1	1	1	Finger/right	10	15	4	10	16	18	16.04	17.64
Joey	Ape	Bonobo	male	9228	Sebastian	male	1	3	1	TS	Towards	same	unknown	unknown	visual	trade	1	1	1	1	1	hands	10	26	8	10	29	2	27.2	30
Joey	Ape	Bonobo	male	9228	Sebastian	male	1	4	3	AS	Away	same	unknown	unknown	position	start	1	0	0	0	0	body	11	47	12	12	17	11	0	30
Joey	Ape	Bonobo	male	9228	Sebastian	male	1	4	3	AS	Away	same	unknown	unknown	action	touch	1	1	1	1	1	hand/left	12	3	9	12	6	5	15.88	18.76
Joey	Ape	Bonobo	male	9228	Sebastian	male	1	4	3	AS	Away	same	unknown	unknown	auditory	bang	1	1	1	1	1	hand/left	12	7	6	12	8	17	19.76	21.24	2x
Joey	Ape	Bonobo	male	9228	Sebastian	male	2	5	2	TD	Towards	different	unknown	unknown	position	start	2	0	0	0	0	body	15	49	23	15	53	2	0	3.2
Joey	Ape	Bonobo	male	9228	Sebastian	male	2	5	2	TD	Towards	different	unknown	unknown	position	switch	1	1	1	1	0	body	15	53	3	16	19	22	3.2	30
Joey	Ape	Bonobo	male	9228	Sebastian	male	2	5	2	TD	Towards	different	unknown	unknown	visual	point	1	1	1	1	1	Finger/right	15	53	23	15	58	23	4	9.04
Joey	Ape	Bonobo	male	9228	Sebastian	male	2	5	2	TD	Towards	different	unknown	unknown	visual	point	1	1	1	1	1	Finger/right	15	59	5	16	0	3	9.28	10.24
Joey	Ape	Bonobo	male	9228	Sebastian	male	2	5	2	TD	Towards	different	unknown	unknown	visual	point	1	1	1	1	1	Finger/right	16	0	4	16	2	8	10.24	12.44
Joey	Ape	Bonobo	male	9228	Sebastian	male	2	5	2	TD	Towards	different	unknown	unknown	visual	point	1	1	1	1	1	Finger/right	16	2	17	16	3	20	12.76	13.92
Joey	Ape	Bonobo	male	9228	Sebastian	male	2	5	2	TD	Towards	different	unknown	unknown	visual	point	1	1	1	1	1	Finger/right	16	4	1	16	5	3	14.12	15.24
Joey	Ape	Bonobo	male	9228	Sebastian	male	2	5	2	TD	Towards	different	unknown	unknown	visual	point	1	1	1	1	1	Finger/right	16	5	10	16	8	19	15.48	18.88
Joey	Ape	Bonobo	male	9228	Sebastian	male	2	5	2	TD	Towards	different	unknown	unknown	visual	point	1	1	1	1	1	Finger/right	16	9	3	16	12	22	19.2	23
Joey	Ape	Bonobo	male	9228	Sebastian	male	2	5	2	TD	Towards	different	unknown	unknown	visual	point	1	1	1	1	1	Finger/right	16	13	4	16	14	0	23.24	24.12
Joey	Ape	Bonobo	male	9228	Sebastian	male	2	5	2	TD	Towards	different	unknown	unknown	visual	point	1	1	1	1	1	Finger/right	16	14	7	16	15	11	24.36	25.56
Joey	Ape	Bonobo	male	9228	Sebastian	male	2	5	2	TD	Towards	different	unknown	unknown	visual	point	1	1	1	1	1	Finger/left	16	15	24	16	18	14	26.04	28.68
Joey	Ape	Bonobo	male	9228	Sebastian	male	2	5	2	TD	Towards	different	unknown	unknown	visual	point	1	1	1	1	1	Finger/right	16	17	24	16	18	14	28.04	28.68
Joey	Ape	Bonobo	male	9228	Sebastian	male	2	5	2	TD	Towards	different	unknown	unknown	visual	point	1	1	1	1	1	Finger/left	16	18	22	16	19	22	28.96	30
Joey	Ape	Bonobo	male	9228	Sebastian	male	2	6	4	AD	Away	different	unknown	unknown	position	start	2	0	0	0	0	body	17	41	4	18	11	3	0	30
Joey	Ape	Bonobo	male	9228	Sebastian	male	2	6	4	AD	Away	different	unknown	unknown	visual	trade	2	1	2	1	2	mouth	17	41	4	17	42	19	0	1.64
Joey	Ape	Bonobo	male	9228	Sebastian	male	2	6	4	AD	Away	different	unknown	unknown	visual	point	2	1	2	1	2	Finger/right	17	47	22	17	48	14	6.72	7.44
Joey	Ape	Bonobo	male	9228	Sebastian	male	2	7	1	TS	Towards	same	unknown	unknown	position	start	1	0	0	0	0	body	19	50	15	20	20	14	0	30
Joey	Ape	Bonobo	male	9228	Sebastian	male	2	7	1	TS	Towards	same	unknown	unknown	visual	point	1	1	1	1	1	Finger/left	19	51	23	19	52	12	1.32	1.92
Joey	Ape	Bonobo	male	9228	Sebastian	male	2	7	1	TS	Towards	same	unknown	unknown	visual	point	1	1	1	1	1	Finger/left	19	58	21	20	0	6	8.24	9.68
Joey	Ape	Bonobo	male	9228	Sebastian	male	2	7	1	TS	Towards	same	unknown	unknown	visual	trade	1	1	1	1	1	hands	20	4	2	20	7	13	13.48	16.96
Joey	Ape	Bonobo	male	9228	Sebastian	male	2	7	1	TS	Towards	same	unknown	unknown	visual	point	1	1	1	1	1	Finger/left	20	8	9	20	13	24	17.76	23.4
Joey	Ape	Bonobo	male	9228	Sebastian	male	2	7	1	TS	Towards	same	unknown	unknown	visual	point	1	1	1	1	1	Finger/left	20	14	3	20	16	1	23.52	25.48
Joey	Ape	Bonobo	male	9228	Sebastian	male	2	7	1	TS	Towards	same	unknown	unknown	visual	point	1	1	1	1	1	Finger/left	20	16	8	20	17	13	25.72	26.96
Joey	Ape	Bonobo	male	9228	Sebastian	male	2	7	1	TS	Towards	same	unknown	unknown	visual	shake hand	1	1	1	1	4	hand/left	20	19	19	20	20	14	29.16	30
Joey	Ape	Bonobo	male	9228	Sebastian	male	2	8	3	AS	Away	same	unknown	unknown	position	start	1	0	0	0	0	body	21	36	14	22	6	13	0	30
Joey	Ape	Bonobo	male	9229	Sebastian	male	3	9	1	TS	Towards	same	unknown	unknown	position	start	1	0	0	0	0	body	24	9	17	24	39	16	0	30
Joey	Ape	Bonobo	male	9229	Sebastian	male	3	9	1	TS	Towards	same	unknown	unknown	visual	point	1	1	1	1	1	Finger/right	24	9	23	24	11	0	0.24	1.36
Joey	Ape	Bonobo	male	9229	Sebastian	male	3	9	1	TS	Towards	same	unknown	unknown	visual	point	1	1	1	1	1	Finger/right	24	17	10	24	20	3	7.72	10.48
Joey	Ape	Bonobo	male	9229	Sebastian	male	3	9	1	TS	Towards	same	unknown	unknown	auditory	bang	1	1	1	1	1	hand/right	24	36	17	24	37	12	27	27.84	2x
Joey	Ape	Bonobo	male	9229	Sebastian	male	3	9	1	TS	Towards	same	unknown	unknown	visual	point	1	1	1	1	1	Finger/right	24	38	5	24	39	16	28.52	30
Joey	Ape	Bonobo	male	9229	Sebastian	male	3	10	2	TD	Towards	different	unknown	unknown	position	start	2	1	2	1	0	body	25	46	0	26	1	14	0	15.6
Joey	Ape	Bonobo	male	9229	Sebastian	male	3	10	2	TD	Towards	different	unknown	unknown	position	switch	2	1	2	1	0	body	26	1	15	26	15	24	15.6	30
Joey	Ape	Bonobo	male	9229	Sebastian	male	3	10	2	TD	Towards	different	unknown	unknown	auditory	bang	2	1	2	1	2	hand/left	26	1	20	26	2	10	15.8	16.44	2x
Joey	Ape	Bonobo	male	9229	Sebastian	male	3	10	2	TD	Towards	different	unknown	unknown	action	wipe	2	1	2	1	2	hand/left	26	2	17	26	3	19	16.68	17.8
Joey	Ape	Bonobo	male	9229	Sebastian	male	3	10	2	TD	Towards	different	unknown	unknown	visual	point	2	1	2	1	2	Fingers/left	26	4	0	26	4	17	18	18.72
Joey	Ape	Bonobo	male	9229	Sebastian	male	3	11	4	AD	Away	different	unknown	unknown	position	start	2	0	0	0	0	body	27	20	22	27	50	21	0	30
Joey	Ape	Bonobo	male	9229	Sebastian	male	3	12	3	AS	Away	same	unknown	unknown	position	start	3	0	0	0	0	body	28	53	0	28	54	0	0	1.04
Joey	Ape	Bonobo	male	9229	Sebastian	male	3	12	3	AS	Away	same	unknown	unknown	position	switch	1	1	1	1	0	body	28	54	1	29	22	24	1.04	30
Joey	Ape	Bonobo	male	9229	Sebastian	male	3	12	3	AS	Away	same	unknown	unknown	auditory	bang	1	1	1	1	1	hand/right	28	54	4	28	54	9	1.16	1.4
Joey	Ape	Bonobo	male	9229	Sebastian	male	3	12	3	AS	Away	same	unknown	unknown	visual	point	1	1	1	1	1	Finger/right	28	54	19	28	55	13	1.76	2.56
Joey	Ape	Bonobo	male	9229	Sebastian	male	4	13	2	TD	Towards	different	unknown	unknown	position	start	2	0	0	0	0	body	32	40	21	33	10	20	0	30
Joey	Ape	Bonobo	male	9229	Sebastian	male	4	13	2	TD	Towards	different	unknown	unknown	visual	shake hand	2	1	2	1	4	hand/left	33	2	20	33	3	6	21.96	22.44
Joey	Ape	Bonobo	male	9229	Sebastian	male	4	14	4	AD	Away	different	unknown	unknown	position	start	2	0	0	0	0	body	34	20	0	34	22	21	0	2.88
Joey	Ape	Bonobo	male	9229	Sebastian	male	4	14	4	AD	Away	different	unknown	unknown	position	center	3	3	1	1	0	body	34	22	22	34	49	24	2.88	30
Joey	Ape	Bonobo	male	9229	Sebastian	male	4	15	3	AS	Away	same	unknown	unknown	position	start	1	0	0	0	0	body	36	0	1	36	30	0	0	30
Joey	Ape	Bonobo	male	9229	Sebastian	male	4	15	3	AS	Away	same	unknown	unknown	auditory	body slap	1	1	1	1	4	hand/left	36	7	19	36	8	22	7.72	8.88
Joey	Ape	Bonobo	male	9229	Sebastian	male	4	16	1	TS	Towards	same	unknown	unknown	position	start	1	0	0	0	0	body	37	21	3	37	51	2	0	30
Joey	Ape	Bonobo	male	9229	Sebastian	male	4	16	1	TS	Towards	same	unknown	unknown	visual	point	1	1	1	1	1	Finger/left	37	22	23	37	23	20	1.8	2.72
Joey	Ape	Bonobo	male	9229	Sebastian	male	4	16	1	TS	Towards	same	unknown	unknown	auditory	bang	1	1	1	1	1	hands	37	24	0	37	24	12	2.88	3.4
Joey	Ape	Bonobo	male	9229	Sebastian	male	4	16	1	TS	Towards	same	unknown	unknown	visual	point	1	1	1	1	1	Finger/left	37	32	22	37	33	19	11.76	12.68
Joey	Ape	Bonobo	male	9229	Sebastian	male	4	16	1	TS	Towards	same	unknown	unknown	visual	point	1	1	1	1	1	Finger/right	37	35	10	37	37	15	14.28	16.52
Joey	Ape	Bonobo	male	9229	Sebastian	male	4	16	1	TS	Towards	same	unknown	unknown	visual	point	1	1	1	1	1	Finger/left	37	36	10	37	37	2	15.28	16
Kuno	Ape	Bonobo	male	4131	Sebastian	male	1	1	1	TS	Towards	same	unknown	unknown	position	start	1	0	0	0	0	body	8	12	11	8	42	10	0	30
Kuno	Ape	Bonobo	male	4131	Sebastian	male	1	1	1	TS	Towards	same	unknown	unknown	visual	point	1	1	1	1	1	Finger/right	8	13	17	8	17	1	1.24	4.64
Kuno	Ape	Bonobo	male	4131	Sebastian	male	1	1	1	TS	Towards	same	unknown	unknown	visual	point	1	1	1	1	1	Finger/right	8	17	14	8	22	0	5.12	9.6
Kuno	Ape	Bonobo	male	4131	Sebastian	male	1	1	1	TS	Towards	same	unknown	unknown	visual	point	1	1	1	1	1	Finger/right	8	22	9	8	26	4	9.92	13.76
Kuno	Ape	Bonobo	male	4131	Sebastian	male	1	1	1	TS	Towards	same	unknown	unknown	visual	point	1	1	1	1	1	Finger/right	8	34	3	8	42	10	21.68	30
Kuno	Ape	Bonobo	male	4131	Sebastian	male	1	2	3	AS	Away	same	unknown	unknown	position	start	1	0	0	0	0	body	9	55	10	10	2	5	0	6.84
Kuno	Ape	Bonobo	male	4131	Sebastian	male	1	2	3	AS	Away	same	unknown	unknown	position	center	3	1	3	1	0	body	10	2	6	10	25	9	6.84	30
Kuno	Ape	Bonobo	male	4131	Sebastian	male	1	2	3	AS	Away	same	unknown	unknown	auditory	bang	3	1	3	1	3	hand/right	10	2	13	10	10	3	7.12	14.76
Kuno	Ape	Bonobo	male	4131	Sebastian	male	1	2	3	AS	Away	same	unknown	unknown	action	touch	3	1	3	1	4	hand/right	10	10	15	10	16	8	15.2	20.96
Kuno	Ape	Bonobo	male	4131	Sebastian	male	1	2	3	AS	Away	same	unknown	unknown	visual	point	3	1	1	1	1	Finger/right	10	16	23	10	25	9	21.52	30
Kuno	Ape	Bonobo	male	4131	Sebastian	male	1	3	2	TD	Towards	different	unknown	unknown	position	start	2	0	0	0	0	body	11	45	0	12	14	24	0	30
Kuno	Ape	Bonobo	male	4131	Sebastian	male	1	3	2	TD	Towards	different	unknown	unknown	visual	point	2	1	3	1	2	Finger/right	11	45	0	11	48	19	0	3.8
Kuno	Ape	Bonobo	male	4131	Sebastian	male	1	3	2	TD	Towards	different	unknown	unknown	visual	point	2	1	3	1	2	Finger/left	11	57	6	12	3	23	12.24	18.96
Kuno	Ape	Bonobo	male	4131	Sebastian	male	1	3	2	TD	Towards	different	unknown	unknown	visual	point	2	1	2	1	2	Finger/right	12	14	0	12	14	24	29	30
Kuno	Ape	Bonobo	male	4131	Sebastian	male	1	4	4	AD	Away	different	unknown	unknown	position	start	2	0	0	0	0	body	13	56	21	14	26	20	0	30
Kuno	Ape	Bonobo	male	4131	Sebastian	male	1	4	4	AD	Away	different	unknown	unknown	action	lick	2	1	2	1	2	mouth	13	58	0	13	58	14	1.16	1.76
Kuno	Ape	Bonobo	male	4131	Sebastian	male	1	4	4	AD	Away	different	unknown	unknown	action	touch	2	1	2	1	3	hand/right	14	11	21	14	24	2	15	27.28
Kuno	Ape	Bonobo	male	4131	Sebastian	male	2	5	2	TD	Towards	different	unknown	unknown	position	start	2	1	1	1	0	body	18	29	24	18	31	1	0	1.12
Kuno	Ape	Bonobo	male	4131	Sebastian	male	2	5	2	TD	Towards	different	unknown	unknown	visual	point	2	1	1	1	2	Finger/right	18	29	24	18	34	11	0	4.52
Kuno	Ape	Bonobo	male	4131	Sebastian	male	2	5	2	TD	Towards	different	unknown	unknown	position	center	3	1	1	1	0	body	18	31	2	18	34	3	1.12	4.2
Kuno	Ape	Bonobo	male	4131	Sebastian	male	2	5	2	TD	Towards	different	unknown	unknown	position	return	2	1	2	1	0	body	18	34	4	18	59	23	4.2	30
Kuno	Ape	Bonobo	male	4131	Sebastian	male	2	6	1	TS	Towards	same	unknown	unknown	position	start	1	0	0	0	0	body	20	53	13	21	14	18	0	21.24
Kuno	Ape	Bonobo	male	4131	Sebastian	male	2	6	1	TS	Towards	same	unknown	unknown	visual	point	1	1	3	1	1	Finger/right	20	55	14	20	58	23	2.04	5.44
Kuno	Ape	Bonobo	male	4131	Sebastian	male	2	6	1	TS	Towards	same	unknown	unknown	visual	point	1	1	3	1	1	Finger/right	21	4	11	21	9	8	10.92	15.84
Kuno	Ape	Bonobo	male	4131	Sebastian	male	2	6	1	TS	Towards	same	unknown	unknown	visual	point	1	1	2	1	1	Finger/right	21	9	15	21	13	9	16.08	19.88
Kuno	Ape	Bonobo	male	4131	Sebastian	male	2	6	1	TS	Towards	same	unknown	unknown	position	center	3	1	2	1	0	body	21	14	19	21	21	20	21.24	28.32
Kuno	Ape	Bonobo	male	4131	Sebastian	male	2	6	1	TS	Towards	same	unknown	unknown	position	switch	2	1	2	1	0	body	21	21	21	21	23	12	28.32	30
Kuno	Ape	Bonobo	male	4131	Sebastian	male	2	7	4	AD	Away	different	unknown	unknown	position	start	2	0	0	0	0	body	22	54	22	23	9	23	0	15.08
Kuno	Ape	Bonobo	male	4131	Sebastian	male	2	7	4	AD	Away	different	unknown	unknown	position	center	3	3	1	1	0	body	23	9	24	23	15	10	15.08	20.56
Kuno	Ape	Bonobo	male	4131	Sebastian	male	2	7	4	AD	Away	different	unknown	unknown	position	return	2	1	2	1	0	body	23	15	11	23	24	21	20.56	30
Kuno	Ape	Bonobo	male	4131	Sebastian	male	2	7	4	AD	Away	different	unknown	unknown	action	touch	2	1	2	1	2	Finger/right	23	15	11	23	16	9	20.56	21.52	hole
Kuno	Ape	Bonobo	male	4131	Sebastian	male	2	8	3	AS	Away	same	unknown	unknown	position	start	1	0	0	0	0	body	24	53	11	25	23	10	0	30
Kuno	Ape	Bonobo	male	4132	Sebastian	male	3	9	3	AS	Away	same	unknown	unknown	position	start	2	0	0	0	0	body	17	45	12	18	15	11	0	30
Kuno	Ape	Bonobo	male	4132	Sebastian	male	3	9	3	AS	Away	same	unknown	unknown	visual	point	2	1	1	1	2	Finger/right	17	45	12	17	46	17	0	1.24
Kuno	Ape	Bonobo	male	4132	Sebastian	male	3	10	1	TS	Towards	same	unknown	unknown	position	start	1	0	0	0	0	body	19	23	1	19	53	0	0	30
Kuno	Ape	Bonobo	male	4132	Sebastian	male	3	10	1	TS	Towards	same	unknown	unknown	visual	point	1	1	1	1	1	Finger/left	19	23	1	19	24	22	0	1.88
Kuno	Ape	Bonobo	male	4132	Sebastian	male	3	10	1	TS	Towards	same	unknown	unknown	visual	point	1	1	1	1	1	Finger/right	19	26	15	19	32	10	3.56	9.4
Kuno	Ape	Bonobo	male	4132	Sebastian	male	3	10	1	TS	Towards	same	unknown	unknown	visual	shake head	1	1	1	1	4	head	19	41	3	19	46	20	18.08	23.8	nod
Kuno	Ape	Bonobo	male	4132	Sebastian	male	3	11	4	AD	Away	different	unknown	unknown	position	start	3	0	0	0	0	body	21	2	3	21	32	2	0	30
Kuno	Ape	Bonobo	male	4132	Sebastian	male	3	11	4	AD	Away	different	unknown	unknown	auditory	vocalization	3	1	3	1	4	mouth	21	14	0	21	17	22	11.88	15.8
Kuno	Ape	Bonobo	male	4132	Sebastian	male	3	12	2	TD	Towards	different	unknown	unknown	position	start	2	0	0	0	0	body	22	41	8	23	11	7	0	30
Kuno	Ape	Bonobo	male	4132	Sebastian	male	3	12	2	TD	Towards	different	unknown	unknown	visual	point	2	1	2	1	2	Finger/right	22	41	8	22	43	24	0	2.68
Kuno	Ape	Bonobo	male	4132	Sebastian	male	3	12	2	TD	Towards	different	unknown	unknown	auditory	vocalization	2	1	2	1	4	mouth	22	49	0	22	49	18	7.68	8.44
Kuno	Ape	Bonobo	male	4132	Sebastian	male	4	13	2	TD	Towards	different	unknown	unknown	position	start	4	0	0	0	0	body	29	37	2	30	7	1	0	30
Kuno	Ape	Bonobo	male	4132	Sebastian	male	4	14	1	TS	Towards	same	unknown	unknown	position	start	3	0	0	0	0	body	31	28	10	31	58	9	0	30
Kuno	Ape	Bonobo	male	4132	Sebastian	male	4	14	1	TS	Towards	same	unknown	unknown	visual	point	3	1	1	1	1	Finger/right	31	28	10	31	38	15	0	10.24
Kuno	Ape	Bonobo	male	4132	Sebastian	male	4	14	1	TS	Towards	same	unknown	unknown	auditory	vocalization	3	1	3	1	4	mouth	31	49	14	31	49	21	21.16	21.48
Kuno	Ape	Bonobo	male	4132	Sebastian	male	4	14	1	TS	Towards	same	unknown	unknown	visual	point	3	1	1	1	1	Finger/left	31	52	8	31	57	19	23.92	29.4
Kuno	Ape	Bonobo	male	4132	Sebastian	male	4	15	4	AD	Away	different	unknown	unknown	position	start	2	0	0	0	0	body	33	4	4	33	34	3	0	30
Kuno	Ape	Bonobo	male	4132	Sebastian	male	4	16	3	AS	Away	same	unknown	unknown	position	start	1	0	0	0	0	body	34	40	23	35	10	22	0	30
Kuno	Ape	Bonobo	male	4132	Sebastian	male	4	16	3	AS	Away	same	unknown	unknown	auditory	vocalization	1	1	1	1	4	mouth	34	56	10	34	57	0	15.48	16.12
Limbuko	Ape	Bonobo	male	4550	Sebastian	male	1	1	1	TS	Towards	same	unknown	unknown	position	start	1	0	0	0	0	body	8	48	14	9	18	13	0	30
Limbuko	Ape	Bonobo	male	4550	Sebastian	male	1	1	1	TS	Towards	same	unknown	unknown	visual	point	1	1	1	1	1	Finger/right	8	49	13	8	50	24	0.96	2.44
Limbuko	Ape	Bonobo	male	4550	Sebastian	male	1	1	1	TS	Towards	same	unknown	unknown	visual	point	1	1	1	1	1	Finger/right	8	51	13	8	53	9	2.96	4.84
Limbuko	Ape	Bonobo	male	4550	Sebastian	male	1	1	1	TS	Towards	same	unknown	unknown	visual	point	1	1	1	1	1	Finger/left	8	54	6	8	56	4	5.68	7.64
Limbuko	Ape	Bonobo	male	4550	Sebastian	male	1	1	1	TS	Towards	same	unknown	unknown	visual	point	1	1	1	1	1	Finger/left	9	2	22	9	4	8	14.32	15.8
Limbuko	Ape	Bonobo	male	4550	Sebastian	male	1	1	1	TS	Towards	same	unknown	unknown	visual	point	1	1	1	1	1	Finger/left	9	9	2	9	10	15	20.52	22.08
Limbuko	Ape	Bonobo	male	4550	Sebastian	male	1	2	3	AS	Away	same	unknown	unknown	position	start	1	0	0	0	0	body	10	55	9	11	8	17	0	13.36
Limbuko	Ape	Bonobo	male	4550	Sebastian	male	1	2	3	AS	Away	same	unknown	unknown	action	touch	1	1	4	0	1	Finger/right	10	57	8	10	57	20	1.96	2.48	hole
Limbuko	Ape	Bonobo	male	4550	Sebastian	male	1	2	3	AS	Away	same	unknown	unknown	action	touch	1	1	4	0	1	Finger/right	10	59	14	11	4	2	4.2	8.76
Limbuko	Ape	Bonobo	male	4550	Sebastian	male	1	2	3	AS	Away	same	unknown	unknown	position	switch	2	1	2	1	0	body	11	8	18	11	12	23	13.36	17.6
Limbuko	Ape	Bonobo	male	4550	Sebastian	male	1	2	3	AS	Away	same	unknown	unknown	position	switch	1	1	1	1	0	body	11	12	24	11	25	8	17.6	30
Limbuko	Ape	Bonobo	male	4550	Sebastian	male	1	3	4	AD	Away	different	unknown	unknown	position	start	1	0	0	0	0	body	12	51	15	12	56	24	0	5.4
Limbuko	Ape	Bonobo	male	4550	Sebastian	male	1	3	4	AD	Away	different	unknown	unknown	position	switch	2	1	2	1	0	body	12	57	0	13	21	14	5.4	30
Limbuko	Ape	Bonobo	male	4550	Sebastian	male	1	3	4	AD	Away	different	unknown	unknown	visual	point	2	1	2	1	2	Finger/left	12	57	11	12	58	1	5.84	6.48
Limbuko	Ape	Bonobo	male	4550	Sebastian	male	1	3	4	AD	Away	different	unknown	unknown	action	wipe	2	1	2	1	2	hand/left	13	19	16	12	21	14	28.04	-30
Limbuko	Ape	Bonobo	male	4550	Sebastian	male	1	4	2	TD	Towards	different	unknown	unknown	position	start	2	0	0	0	0	body	14	58	0	15	5	3	0	7.16
Limbuko	Ape	Bonobo	male	4550	Sebastian	male	1	4	2	TD	Towards	different	unknown	unknown	visual	point	2	1	2	1	2	Finger/right	14	59	3	14	59	13	1.12	1.56	hole
Limbuko	Ape	Bonobo	male	4550	Sebastian	male	1	4	2	TD	Towards	different	unknown	unknown	position	switch	1	1	1	1	0	body	15	5	4	15	8	16	7.16	10.68
Limbuko	Ape	Bonobo	male	4550	Sebastian	male	1	4	2	TD	Towards	different	unknown	unknown	visual	point	1	1	1	1	1	Finger/left	15	5	23	15	7	17	7.92	9.72
Limbuko	Ape	Bonobo	male	4550	Sebastian	male	1	4	2	TD	Towards	different	unknown	unknown	position	center	3	1	2	1	0	body	15	8	17	15	10	19	10.68	12.8
Limbuko	Ape	Bonobo	male	4550	Sebastian	male	1	4	2	TD	Towards	different	unknown	unknown	visual	point	3	1	2	1	2	Finger/left	15	8	23	15	10	1	10.92	12.08
Limbuko	Ape	Bonobo	male	4550	Sebastian	male	1	4	2	TD	Towards	different	unknown	unknown	position	return	1	1	1	1	0	body	15	10	20	15	27	24	12.8	30
Limbuko	Ape	Bonobo	male	4550	Sebastian	male	1	4	2	TD	Towards	different	unknown	unknown	visual	point	1	1	1	1	1	Finger/left	15	11	3	15	12	0	13.12	14.04
Limbuko	Ape	Bonobo	male	4550	Sebastian	male	2	5	2	TD	Towards	different	unknown	unknown	position	start	4	0	0	0	0	body	16	52	13	17	22	12	0	30
Limbuko	Ape	Bonobo	male	4550	Sebastian	male	2	6	4	AD	Away	different	unknown	unknown	position	start	4	0	0	0	0	body	18	32	8	19	2	7	0	30
Limbuko	Ape	Bonobo	male	4550	Sebastian	male	2	7	1	TS	Towards	same	unknown	unknown	position	start	1	0	0	0	0	body	20	14	14	20	44	13	0	30
Limbuko	Ape	Bonobo	male	4550	Sebastian	male	2	7	1	TS	Towards	same	unknown	unknown	visual	point	1	1	1	1	1	Finger/left	20	16	12	20	17	21	1.92	3.32
Limbuko	Ape	Bonobo	male	4550	Sebastian	male	2	7	1	TS	Towards	same	unknown	unknown	visual	point	1	1	1	1	1	Finger/left	20	27	10	20	28	12	12.84	13.96
Limbuko	Ape	Bonobo	male	4550	Sebastian	male	2	8	3	AS	Away	same	unknown	unknown	position	start	4	0	0	0	0	body	21	49	8	22	19	7	0	30
Limbuko	Ape	Bonobo	male	4551	Sebastian	male	3	9	1	TS	Towards	same	unknown	unknown	position	start	2	0	0	0	0	body	6	38	18	6	40	10	0	1.72
Limbuko	Ape	Bonobo	male	4551	Sebastian	male	3	9	1	TS	Towards	same	unknown	unknown	position	switch	1	1	1	1	0	body	6	40	11	7	8	17	1.72	30
Limbuko	Ape	Bonobo	male	4551	Sebastian	male	3	9	1	TS	Towards	same	unknown	unknown	visual	point	1	1	2	1	1	Finger/left	6	41	10	6	44	6	2.68	5.56
Limbuko	Ape	Bonobo	male	4551	Sebastian	male	3	9	1	TS	Towards	same	unknown	unknown	visual	point	1	1	1	1	1	Finger/left	6	49	23	6	51	23	11.2	13.24
Limbuko	Ape	Bonobo	male	4551	Sebastian	male	3	10	3	AS	Away	same	unknown	unknown	position	start	1	0	0	0	0	body	8	28	1	8	58	0	0	30
Limbuko	Ape	Bonobo	male	4551	Sebastian	male	3	11	4	AD	Away	different	unknown	unknown	position	start	4	0	0	0	0	body	10	13	20	10	43	19	0	30
Limbuko	Ape	Bonobo	male	4551	Sebastian	male	3	12	2	TD	Towards	different	unknown	unknown	position	start	4	0	0	0	0	body	12	15	4	12	45	3	0	30
Limbuko	Ape	Bonobo	male	4551	Sebastian	male	4	13	4	AD	Away	different	unknown	unknown	position	start	2	0	0	0	0	body	15	59	19	16	29	18	0	30
Limbuko	Ape	Bonobo	male	4551	Sebastian	male	4	14	3	AS	Away	same	unknown	unknown	position	start	2	0	0	0	0	body	17	29	12	17	49	12	0	20.04
Limbuko	Ape	Bonobo	male	4551	Sebastian	male	4	14	3	AS	Away	same	unknown	unknown	auditory	vocalization	2	1	1	1	4	mouth	17	29	12	17	30	12	0	1.04
Limbuko	Ape	Bonobo	male	4551	Sebastian	male	4	14	3	AS	Away	same	unknown	unknown	auditory	vocalization	2	1	1	1	4	mouth	17	33	22	17	34	9	4.4	4.92
Limbuko	Ape	Bonobo	male	4551	Sebastian	male	4	14	3	AS	Away	same	unknown	unknown	visual	shake head	2	1	2	1	4	head	17	36	12	17	37	10	7	7.96	nod
Limbuko	Ape	Bonobo	male	4551	Sebastian	male	4	14	3	AS	Away	same	unknown	unknown	position	center	3	1	1	1	0	body	17	49	13	17	52	14	20.04	23.12
Limbuko	Ape	Bonobo	male	4551	Sebastian	male	4	14	3	AS	Away	same	unknown	unknown	auditory	vocalization	3	1	1	1	4	mouth	17	51	0	17	51	19	21.52	22.32
Limbuko	Ape	Bonobo	male	4551	Sebastian	male	4	14	3	AS	Away	same	unknown	unknown	position	return	2	1	2	1	0	body	17	52	15	17	59	11	23.12	30
Limbuko	Ape	Bonobo	male	4551	Sebastian	male	4	14	3	AS	Away	same	unknown	unknown	auditory	vocalization	2	1	4	0	4	mouth	17	52	15	17	54	9	23.12	24.92
Limbuko	Ape	Bonobo	male	4551	Sebastian	male	4	15	2	TD	Towards	different	unknown	unknown	position	start	2	0	0	0	0	body	19	32	18	20	2	17	0	30
Limbuko	Ape	Bonobo	male	4551	Sebastian	male	4	16	1	TS	Towards	same	unknown	unknown	position	start	3	0	0	0	0	body	21	11	11	21	12	3	0	0.72
Limbuko	Ape	Bonobo	male	4551	Sebastian	male	4	16	1	TS	Towards	same	unknown	unknown	position	switch	1	1	1	1	0	body	21	12	4	21	14	18	0.72	3.32
Limbuko	Ape	Bonobo	male	4551	Sebastian	male	4	16	1	TS	Towards	same	unknown	unknown	visual	shake head	1	1	1	1	4	head	21	12	10	21	13	2	0.96	1.68	nod
Limbuko	Ape	Bonobo	male	4551	Sebastian	male	4	16	1	TS	Towards	same	unknown	unknown	visual	point	1	1	1	1	1	Finger/left	21	13	6	21	14	16	1.8	3.24
Limbuko	Ape	Bonobo	male	4551	Sebastian	male	4	16	1	TS	Towards	same	unknown	unknown	position	center	3	1	2	1	0	body	21	14	19	21	20	11	3.32	9.04
Limbuko	Ape	Bonobo	male	4551	Sebastian	male	4	16	1	TS	Towards	same	unknown	unknown	visual	shake head	3	1	3	1	4	head	21	14	19	21	15	7	3.32	3.88	nod
Limbuko	Ape	Bonobo	male	4551	Sebastian	male	4	16	1	TS	Towards	same	unknown	unknown	visual	shake head	3	1	3	1	4	head	21	18	15	21	19	7	7.16	7.88	nod
Limbuko	Ape	Bonobo	male	4551	Sebastian	male	4	16	1	TS	Towards	same	unknown	unknown	position	switch	2	1	2	1	0	body	21	20	12	21	41	10	9.04	30
Limbuko	Ape	Bonobo	male	4551	Sebastian	male	4	16	1	TS	Towards	same	unknown	unknown	action	touch	2	1	2	1	4	Fingers/left	21	22	0	21	41	0	10.56	29.6
Ulindi	Ape	Bonobo	female	5274	Sebastian	male	1	1	1	TS	Towards	same	unknown	unknown	position	start	1	0	0	0	0	body	32	55	10	33	25	9	0	30
Ulindi	Ape	Bonobo	female	5274	Sebastian	male	1	1	1	TS	Towards	same	unknown	unknown	visual	point	1	1	1	1	1	Fingers/left	32	56	2	32	57	10	0.68	2.04
Ulindi	Ape	Bonobo	female	5274	Sebastian	male	1	1	1	TS	Towards	same	unknown	unknown	visual	shake head	1	1	1	1	4	head	32	56	22	32	57	10	1.48	2.04	nod
Ulindi	Ape	Bonobo	female	5274	Sebastian	male	1	1	1	TS	Towards	same	unknown	unknown	visual	shake head	1	1	1	1	4	head	32	57	10	32	57	22	2	2.52	nod
Ulindi	Ape	Bonobo	female	5274	Sebastian	male	1	1	1	TS	Towards	same	unknown	unknown	visual	point	1	1	1	1	1	Finger/right	32	58	13	32	58	19	3.12	3.4
Ulindi	Ape	Bonobo	female	5274	Sebastian	male	1	1	1	TS	Towards	same	unknown	unknown	visual	point	1	1	1	1	1	Fingers/left	32	59	16	33	3	0	4.24	7.64
Ulindi	Ape	Bonobo	female	5274	Sebastian	male	1	1	1	TS	Towards	same	unknown	unknown	visual	point	1	1	1	1	1	Fingers/left	33	4	9	33	5	22	8.96	10.52
Ulindi	Ape	Bonobo	female	5274	Sebastian	male	1	1	1	TS	Towards	same	unknown	unknown	auditory	bang	1	1	1	1	3	Fingers/left	33	6	9	33	8	19	10.96	13.4
Ulindi	Ape	Bonobo	female	5274	Sebastian	male	1	1	1	TS	Towards	same	unknown	unknown	visual	point	1	1	1	1	1	Fingers/left	33	11	20	33	18	17	16.4	23.32
Ulindi	Ape	Bonobo	female	5274	Sebastian	male	1	1	1	TS	Towards	same	unknown	unknown	visual	point	1	1	1	1	1	Fingers/right	33	19	24	33	24	7	24.56	28.92
Ulindi	Ape	Bonobo	female	5274	Sebastian	male	1	1	1	TS	Towards	same	unknown	unknown	visual	shake head	1	1	1	1	4	head	33	24	3	33	24	20	28.72	29.44	nod
Ulindi	Ape	Bonobo	female	5274	Sebastian	male	1	2	4	AD	Away	different	unknown	unknown	position	start	2	0	0	0	0	body	42	9	9	42	39	8	0	30
Ulindi	Ape	Bonobo	female	5274	Sebastian	male	1	2	4	AD	Away	different	unknown	unknown	visual	point	2	1	3	1	2	Finger/right	42	14	24	42	17	9	5.6	8.04
Ulindi	Ape	Bonobo	female	5274	Sebastian	male	1	3	2	TD	Towards	different	unknown	unknown	position	start	2	0	0	0	0	body	44	4	9	44	5	16	0	1.32
Ulindi	Ape	Bonobo	female	5274	Sebastian	male	1	3	2	TD	Towards	different	unknown	unknown	position	switch	1	3	1	1	0	body	44	5	17	44	34	8	1.32	30
Ulindi	Ape	Bonobo	female	5274	Sebastian	male	1	3	2	TD	Towards	different	unknown	unknown	visual	point	1	1	1	1	1	Fingers/right	44	31	7	44	32	21	26.92	28.52
Ulindi	Ape	Bonobo	female	5274	Sebastian	male	1	3	2	TD	Towards	different	unknown	unknown	action	unknown	1	1	1	1	1	body	44	32	7	44	32	21	27.92	28.52
Ulindi	Ape	Bonobo	female	5274	Sebastian	male	1	4	3	AS	Away	same	unknown	unknown	position	start	3	0	0	0	0	body	46	9	15	46	21	17	0	12.12
Ulindi	Ape	Bonobo	female	5274	Sebastian	male	1	4	3	AS	Away	same	unknown	unknown	action	touch	3	1	3	1	3	Fingers/left	46	9	15	46	12	5	0	2.64
Ulindi	Ape	Bonobo	female	5274	Sebastian	male	1	4	3	AS	Away	same	unknown	unknown	action	touch	3	1	3	1	3	Fingers/right	46	13	10	46	15	0	3.8	5.44
Ulindi	Ape	Bonobo	female	5274	Sebastian	male	1	4	3	AS	Away	same	unknown	unknown	auditory	bang	3	1	3	1	3	Fingers/right	46	15	8	46	17	15	5.72	8.04
Ulindi	Ape	Bonobo	female	5274	Sebastian	male	1	4	3	AS	Away	same	unknown	unknown	visual	point	3	1	2	1	2	Fingers/right	46	17	24	46	20	8	8.36	10.76
Ulindi	Ape	Bonobo	female	5274	Sebastian	male	1	4	3	AS	Away	same	unknown	unknown	position	switch	1	1	1	1	0	body	46	21	18	46	38	20	12.12	29.24
Ulindi	Ape	Bonobo	female	5274	Sebastian	male	1	4	3	AS	Away	same	unknown	unknown	position	center	3	1	2	1	0	body	46	38	21	46	39	14	29.24	30
Ulindi	Ape	Bonobo	female	5274	Sebastian	male	2	5	2	TD	Towards	different	unknown	unknown	position	start	2	0	0	0	0	body	49	59	13	50	5	12	0	6
Ulindi	Ape	Bonobo	female	5274	Sebastian	male	2	5	2	TD	Towards	different	unknown	unknown	visual	point	2	1	3	1	2	Fingers/right	49	59	13	50	4	0	0	4.52
Ulindi	Ape	Bonobo	female	5274	Sebastian	male	2	5	2	TD	Towards	different	unknown	unknown	position	switch	1	1	1	1	0	body	50	5	13	50	13	20	6	14.32
Ulindi	Ape	Bonobo	female	5274	Sebastian	male	2	5	2	TD	Towards	different	unknown	unknown	visual	point	1	1	1	1	1	Fingers/left	50	6	10	50	11	1	6.88	11.56
Ulindi	Ape	Bonobo	female	5274	Sebastian	male	2	5	2	TD	Towards	different	unknown	unknown	visual	shake head	1	1	1	1	4	head	50	6	16	50	7	1	7.12	7.56
Ulindi	Ape	Bonobo	female	5274	Sebastian	male	2	5	2	TD	Towards	different	unknown	unknown	visual	shake head	1	1	1	1	4	head	50	7	17	50	8	3	8.16	8.64
Ulindi	Ape	Bonobo	female	5274	Sebastian	male	2	5	2	TD	Towards	different	unknown	unknown	auditory	bang	1	1	1	1	3	hand/left	50	11	16	50	12	12	12.12	13
Ulindi	Ape	Bonobo	female	5274	Sebastian	male	2	5	2	TD	Towards	different	unknown	unknown	position	switch	2	1	2	1	0	body	50	13	21	50	29	12	14.32	30
Ulindi	Ape	Bonobo	female	5274	Sebastian	male	2	5	2	TD	Towards	different	unknown	unknown	visual	point	2	1	2	1	2	Finger/right	50	16	1	50	17	10	16.52	17.92
Ulindi	Ape	Bonobo	female	5274	Sebastian	male	2	5	2	TD	Towards	different	unknown	unknown	visual	point	2	1	2	1	2	Finger/right	50	17	21	50	20	5	18.32	20.72
Ulindi	Ape	Bonobo	female	5274	Sebastian	male	2	6	3	AS	Away	same	unknown	unknown	position	start	1	1	1	1	0	body	52	39	14	52	47	11	0	7.92
Ulindi	Ape	Bonobo	female	5274	Sebastian	male	2	6	3	AS	Away	same	unknown	unknown	position	switch	2	1	2	1	0	body	52	47	12	53	9	13	7.92	30
Ulindi	Ape	Bonobo	female	5274	Sebastian	male	2	7	1	TS	Towards	same	unknown	unknown	position	start	1	0	0	0	0	body	54	26	21	54	56	20	0	30
Ulindi	Ape	Bonobo	female	5274	Sebastian	male	2	7	1	TS	Towards	same	unknown	unknown	visual	point	1	1	1	1	1	Fingers/right	54	26	21	54	28	0	0	1.2
Ulindi	Ape	Bonobo	female	5274	Sebastian	male	2	7	1	TS	Towards	same	unknown	unknown	visual	point	1	1	1	1	1	Fingers/right	54	32	24	54	35	0	6.12	8.2
Ulindi	Ape	Bonobo	female	5274	Sebastian	male	2	7	1	TS	Towards	same	unknown	unknown	visual	point	1	1	2	1	1	Finger/right	54	35	13	54	37	4	8.68	10.36
Ulindi	Ape	Bonobo	female	5274	Sebastian	male	2	7	1	TS	Towards	same	unknown	unknown	visual	point	1	1	1	1	1	Fingers/right	54	46	9	54	48	22	19.52	22.08
Ulindi	Ape	Bonobo	female	5274	Sebastian	male	2	7	1	TS	Towards	same	unknown	unknown	action	touch	1	1	1	1	3	Finger/right	54	49	12	54	50	11	22.64	23.64
Ulindi	Ape	Bonobo	female	5274	Sebastian	male	2	7	1	TS	Towards	same	unknown	unknown	visual	point	1	1	1	1	1	Fingers/left	54	52	4	54	56	20	25.32	30
Ulindi	Ape	Bonobo	female	5274	Sebastian	male	2	7	1	TS	Towards	same	unknown	unknown	visual	shake head	1	1	1	1	4	head	54	54	18	54	55	3	27.88	28.32	nod
Ulindi	Ape	Bonobo	female	5274	Sebastian	male	2	8	4	AD	Away	different	unknown	unknown	position	start	2	1	2	1	0	body	56	2	17	56	17	5	0	14.56
Ulindi	Ape	Bonobo	female	5274	Sebastian	male	2	8	4	AD	Away	different	unknown	unknown	visual	point	2	1	2	1	2	Fingers/right	56	12	8	56	13	0	9.64	10.36
Ulindi	Ape	Bonobo	female	5274	Sebastian	male	2	8	4	AD	Away	different	unknown	unknown	position	switch	1	1	1	1	0	body	56	17	6	56	32	16	14.56	30
Ulindi	Ape	Bonobo	female	5275	Sebastian	male	3	9	4	AD	Away	different	unknown	unknown	position	start	2	0	0	0	0	body	2	36	24	2	39	17	0	2.76
Ulindi	Ape	Bonobo	female	5275	Sebastian	male	3	9	4	AD	Away	different	unknown	unknown	visual	point	2	1	2	1	2	Finger/left	2	37	19	2	38	4	0.8	1.24
Ulindi	Ape	Bonobo	female	5275	Sebastian	male	3	9	4	AD	Away	different	unknown	unknown	position	switch	1	1	1	1	0	body	2	39	18	3	6	23	2.76	30
Ulindi	Ape	Bonobo	female	5275	Sebastian	male	3	10	3	AS	Away	same	unknown	unknown	position	start	1	0	0	0	0	body	4	16	4	4	46	3	0	30
Ulindi	Ape	Bonobo	female	5275	Sebastian	male	3	10	3	AS	Away	same	unknown	unknown	visual	point	1	1	3	1	1	Finger/left	4	24	10	4	25	20	8.24	9.68
Ulindi	Ape	Bonobo	female	5275	Sebastian	male	3	11	1	TS	Towards	same	unknown	unknown	position	start	3	0	0	0	0	body	5	47	21	5	55	24	0	8.16
Ulindi	Ape	Bonobo	female	5275	Sebastian	male	3	11	1	TS	Towards	same	unknown	unknown	visual	point	3	1	1	1	1	Finger/right	5	47	21	5	55	16	0	7.84
Ulindi	Ape	Bonobo	female	5275	Sebastian	male	3	11	1	TS	Towards	same	unknown	unknown	position	switch	1	1	1	1	0	body	5	56	0	6	17	20	8.16	30
Ulindi	Ape	Bonobo	female	5275	Sebastian	male	3	11	1	TS	Towards	same	unknown	unknown	visual	point	1	1	1	1	1	Finger/left	5	56	10	6	0	16	8.56	12.84
Ulindi	Ape	Bonobo	female	5275	Sebastian	male	3	11	1	TS	Towards	same	unknown	unknown	visual	point	1	1	3	1	1	Finger/left	6	8	8	6	15	16	20.48	27.84
Ulindi	Ape	Bonobo	female	5275	Sebastian	male	3	12	2	TD	Towards	different	unknown	unknown	position	start	2	0	0	0	0	body	7	13	24	7	16	4	0	2.24
Ulindi	Ape	Bonobo	female	5275	Sebastian	male	3	12	2	TD	Towards	different	unknown	unknown	visual	point	2	1	1	1	2	Finger/left	7	13	24	7	14	9	0	0.44
Ulindi	Ape	Bonobo	female	5275	Sebastian	male	3	12	2	TD	Towards	different	unknown	unknown	position	switch	1	1	1	1	0	body	7	16	5	7	35	11	2.24	21.52
Ulindi	Ape	Bonobo	female	5275	Sebastian	male	3	12	2	TD	Towards	different	unknown	unknown	visual	point	1	1	1	1	1	Finger/right	7	16	9	7	28	7	2.4	14.36
Ulindi	Ape	Bonobo	female	5275	Sebastian	male	3	12	2	TD	Towards	different	unknown	unknown	visual	point	1	1	2	1	1	Finger/right	7	31	7	7	35	2	17.32	21.16
Ulindi	Ape	Bonobo	female	5275	Sebastian	male	3	12	2	TD	Towards	different	unknown	unknown	position	center	3	1	2	1	0	body	7	35	12	7	42	11	21.52	28.52
Ulindi	Ape	Bonobo	female	5275	Sebastian	male	3	12	2	TD	Towards	different	unknown	unknown	visual	point	3	1	2	1	2	Finger/right	7	38	3	7	40	0	24.16	26.08
Ulindi	Ape	Bonobo	female	5275	Sebastian	male	3	12	2	TD	Towards	different	unknown	unknown	position	switch	2	1	2	1	0	body	7	42	12	7	43	23	28.52	30
Ulindi	Ape	Bonobo	female	5275	Sebastian	male	4	13	2	TD	Towards	different	unknown	unknown	position	start	2	0	0	0	0	body	11	2	15	11	10	5	0	7.64
Ulindi	Ape	Bonobo	female	5275	Sebastian	male	4	13	2	TD	Towards	different	unknown	unknown	visual	point	2	1	2	1	2	Finger/right	11	5	17	11	7	17	3.08	5.12
Ulindi	Ape	Bonobo	female	5275	Sebastian	male	4	13	2	TD	Towards	different	unknown	unknown	position	switch	1	1	1	1	0	body	11	10	6	11	19	15	7.64	17.04
Ulindi	Ape	Bonobo	female	5275	Sebastian	male	4	13	2	TD	Towards	different	unknown	unknown	visual	point	1	1	1	1	1	Finger/left	11	10	14	11	14	0	7.96	11.44
Ulindi	Ape	Bonobo	female	5275	Sebastian	male	4	13	2	TD	Towards	different	unknown	unknown	position	switch	2	1	2	1	0	body	11	19	16	11	32	14	17.04	30
Ulindi	Ape	Bonobo	female	5275	Sebastian	male	4	13	2	TD	Towards	different	unknown	unknown	visual	point	2	1	2	1	2	Finger/right	11	20	13	11	21	17	17.92	19.12
Ulindi	Ape	Bonobo	female	5275	Sebastian	male	4	14	3	AS	Away	same	unknown	unknown	position	start	1	0	0	0	0	body	12	35	7	13	5	1	0	29.8
Ulindi	Ape	Bonobo	female	5275	Sebastian	male	4	14	3	AS	Away	same	unknown	unknown	visual	point	1	1	1	1	1	Finger/right	12	35	7	12	39	9	0	4.12
Ulindi	Ape	Bonobo	female	5275	Sebastian	male	4	14	3	AS	Away	same	unknown	unknown	visual	point	1	1	1	1	1	Finger/right	12	55	1	13	0	2	19.76	24.84
Ulindi	Ape	Bonobo	female	5275	Sebastian	male	4	14	3	AS	Away	same	unknown	unknown	position	switch	2	3	4	0	0	body	13	5	2	13	5	6	29.8	30
Ulindi	Ape	Bonobo	female	5275	Sebastian	male	4	15	1	TS	Towards	same	unknown	unknown	position	start	1	0	0	0	0	body	14	6	6	14	25	5	0	19
Ulindi	Ape	Bonobo	female	5275	Sebastian	male	4	15	1	TS	Towards	same	unknown	unknown	visual	point	1	1	3	1	1	Finger/right	14	6	6	14	9	19	0	3.56
Ulindi	Ape	Bonobo	female	5275	Sebastian	male	4	15	1	TS	Towards	same	unknown	unknown	visual	point	1	1	3	1	1	Finger/left	14	10	9	14	12	2	4.12	5.88
Ulindi	Ape	Bonobo	female	5275	Sebastian	male	4	15	1	TS	Towards	same	unknown	unknown	visual	point	1	1	1	1	1	Finger/left	14	12	9	14	13	19	6.12	7.56
Ulindi	Ape	Bonobo	female	5275	Sebastian	male	4	15	1	TS	Towards	same	unknown	unknown	visual	point	1	1	2	1	1	Finger/left	14	14	10	14	15	16	8.16	9.44
Ulindi	Ape	Bonobo	female	5275	Sebastian	male	4	15	1	TS	Towards	same	unknown	unknown	visual	point	1	1	1	1	1	Finger/left	14	24	5	14	26	21	17.96	20.64
Ulindi	Ape	Bonobo	female	5275	Sebastian	male	4	15	1	TS	Towards	same	unknown	unknown	position	center	3	1	1	1	0	body	14	25	6	14	36	5	19	30
Ulindi	Ape	Bonobo	female	5275	Sebastian	male	4	16	4	AD	Away	different	unknown	unknown	position	start	2	1	2	1	0	body	15	51	3	15	54	13	0	3.44
Ulindi	Ape	Bonobo	female	5275	Sebastian	male	4	16	4	AD	Away	different	unknown	unknown	position	center	3	1	4	0	0	body	15	54	14	16	4	14	3.44	13.48
Ulindi	Ape	Bonobo	female	5275	Sebastian	male	4	16	4	AD	Away	different	unknown	unknown	position	return	2	1	2	1	0	body	16	4	15	16	21	2	13.48	30
Ulindi	Ape	Bonobo	female	5275	Sebastian	male	4	16	4	AD	Away	different	unknown	unknown	visual	point	2	1	2	1	2	Finger/left	16	4	22	16	6	2	13.76	15
Yasa	Ape	Bonobo	female	3857	Sebastian	male	1	1	3	AS	Away	same	unknown	unknown	position	start	1	1	1	1	0	body	32	10	0	32	21	1	0	11.08
Yasa	Ape	Bonobo	female	3857	Sebastian	male	1	1	3	AS	Away	same	unknown	unknown	position	switch	2	1	2	1	0	body	32	21	2	32	39	24	11.08	30
Yasa	Ape	Bonobo	female	3857	Sebastian	male	1	2	1	TS	Towards	same	unknown	unknown	position	start	1	0	0	0	0	body	33	47	21	34	17	20	0	30
Yasa	Ape	Bonobo	female	3857	Sebastian	male	1	2	1	TS	Towards	same	unknown	unknown	visual	point	1	1	1	1	1	Finger/right	33	48	10	33	49	14	0.56	1.76
Yasa	Ape	Bonobo	female	3857	Sebastian	male	1	2	1	TS	Towards	same	unknown	unknown	auditory	bang	1	1	1	1	3	Finger/right	33	49	23	33	52	9	2.08	4.56
Yasa	Ape	Bonobo	female	3857	Sebastian	male	1	2	1	TS	Towards	same	unknown	unknown	visual	point	1	1	1	1	1	Finger/right	33	52	22	33	54	16	5.04	6.84
Yasa	Ape	Bonobo	female	3857	Sebastian	male	1	2	1	TS	Towards	same	unknown	unknown	visual	point	1	1	1	1	1	Finger/right	33	57	19	33	58	10	9.92	10.6
Yasa	Ape	Bonobo	female	3857	Sebastian	male	1	2	1	TS	Towards	same	unknown	unknown	visual	point	1	1	1	1	1	Finger/right	34	1	7	34	2	14	13.44	14.76
Yasa	Ape	Bonobo	female	3857	Sebastian	male	1	2	1	TS	Towards	same	unknown	unknown	auditory	bang	1	1	3	1	3	Finger/right	34	3	0	34	4	15	15.16	16.8
Yasa	Ape	Bonobo	female	3857	Sebastian	male	1	2	1	TS	Towards	same	unknown	unknown	visual	point	1	1	1	1	1	Finger/left	34	5	0	34	16	14	17.16	28.76
Yasa	Ape	Bonobo	female	3857	Sebastian	male	1	2	1	TS	Towards	same	unknown	unknown	auditory	bang	1	1	1	1	3	Finger/left	34	16	21	34	17	20	29	30
Yasa	Ape	Bonobo	female	3857	Sebastian	male	1	3	2	TD	Towards	different	unknown	unknown	position	start	2	0	0	0	0	body	35	27	11	35	28	18	0	1.32
Yasa	Ape	Bonobo	female	3857	Sebastian	male	1	3	2	TD	Towards	different	unknown	unknown	position	switch	1	1	2	1	0	body	35	28	19	35	57	10	1.32	30
Yasa	Ape	Bonobo	female	3857	Sebastian	male	1	3	2	TD	Towards	different	unknown	unknown	visual	point	1	1	1	1	1	Finger/right	35	31	2	35	35	4	3.64	7.76
Yasa	Ape	Bonobo	female	3857	Sebastian	male	1	4	4	AD	Away	different	unknown	unknown	position	start	1	0	0	0	0	body	37	26	4	37	56	3	0	30
Yasa	Ape	Bonobo	female	3857	Sebastian	male	2	5	2	TD	Towards	different	unknown	unknown	position	start	2	3	2	1	0	body	42	8	14	42	35	14	0	27.04
Yasa	Ape	Bonobo	female	3857	Sebastian	male	2	5	2	TD	Towards	different	unknown	unknown	position	switch	1	3	1	1	0	body	42	35	15	42	38	13	27.04	30
Yasa	Ape	Bonobo	female	3857	Sebastian	male	2	6	4	AD	Away	different	unknown	unknown	position	start	3	0	0	0	0	body	44	9	18	44	10	14	0	0.88
Yasa	Ape	Bonobo	female	3857	Sebastian	male	2	6	4	AD	Away	different	unknown	unknown	position	switch	1	1	1	1	0	body	44	10	15	44	33	7	0.88	23.6
Yasa	Ape	Bonobo	female	3857	Sebastian	male	2	6	4	AD	Away	different	unknown	unknown	other	away	1	2	4	0	4	body	44	19	20	44	29	21	10.08	20.16
Yasa	Ape	Bonobo	female	3857	Sebastian	male	2	6	4	AD	Away	different	unknown	unknown	position	switch	2	1	2	1	0	body	44	33	8	44	39	17	23.6	30
Yasa	Ape	Bonobo	female	3857	Sebastian	male	2	6	4	AD	Away	different	unknown	unknown	visual	point	2	1	2	1	2	Finger/right	44	34	10	44	35	6	24.68	25.56
Yasa	Ape	Bonobo	female	3857	Sebastian	male	2	6	4	AD	Away	different	unknown	unknown	visual	point	2	1	2	1	2	Finger/right	44	35	17	44	36	22	25.96	27.2
Yasa	Ape	Bonobo	female	3857	Sebastian	male	2	6	4	AD	Away	different	unknown	unknown	visual	point	2	1	1	1	2	Finger/right	44	37	1	44	38	0	27.32	28.32
Yasa	Ape	Bonobo	female	3857	Sebastian	male	2	7	1	TS	Towards	same	unknown	unknown	position	start	1	0	0	0	0	body	46	3	8	46	33	7	0	30
Yasa	Ape	Bonobo	female	3857	Sebastian	male	2	7	1	TS	Towards	same	unknown	unknown	visual	point	1	1	1	1	1	Finger/right	46	3	9	46	4	12	0.04	1.2
Yasa	Ape	Bonobo	female	3857	Sebastian	male	2	7	1	TS	Towards	same	unknown	unknown	auditory	bang	1	1	1	1	3	Finger/right	46	4	17	46	6	2	1.36	2.8
Yasa	Ape	Bonobo	female	3857	Sebastian	male	2	7	1	TS	Towards	same	unknown	unknown	visual	point	1	1	1	1	1	Finger/right	46	6	6	46	7	15	2.92	4.32
Yasa	Ape	Bonobo	female	3857	Sebastian	male	2	7	1	TS	Towards	same	unknown	unknown	visual	point	1	1	1	1	1	Finger/right	46	8	0	46	15	4	4.68	11.88
Yasa	Ape	Bonobo	female	3857	Sebastian	male	2	7	1	TS	Towards	same	unknown	unknown	visual	point	1	1	1	1	1	Finger/right	46	15	8	46	24	1	12	20.76
Yasa	Ape	Bonobo	female	3857	Sebastian	male	2	8	3	AS	Away	same	unknown	unknown	position	start	1	0	0	0	0	body	47	48	21	48	18	20	0	30
Yasa	Ape	Bonobo	female	3858	Sebastian	male	3	9	4	AD	Away	different	unknown	unknown	position	start	2	0	0	0	0	body	41	37	6	42	7	5	0	30
Yasa	Ape	Bonobo	female	3858	Sebastian	male	3	9	4	AD	Away	different	unknown	unknown	visual	point	2	1	2	1	2	Finger/right	41	37	6	41	37	12	0	0.28
Yasa	Ape	Bonobo	female	3858	Sebastian	male	3	9	4	AD	Away	different	unknown	unknown	visual	point	2	1	2	1	2	Finger/right	41	37	19	41	40	2	0.52	2.88
Yasa	Ape	Bonobo	female	3858	Sebastian	male	3	9	4	AD	Away	different	unknown	unknown	visual	point	2	1	2	1	2	Finger/right	41	40	12	41	41	22	3.24	4.68
Yasa	Ape	Bonobo	female	3858	Sebastian	male	3	9	4	AD	Away	different	unknown	unknown	visual	point	2	1	2	1	2	Finger/left	41	42	10	41	42	16	5.16	5.44
Yasa	Ape	Bonobo	female	3858	Sebastian	male	3	9	4	AD	Away	different	unknown	unknown	visual	point	2	1	2	1	2	Finger/left	41	48	14	41	50	5	11.32	13
Yasa	Ape	Bonobo	female	3858	Sebastian	male	3	10	2	TD	Towards	different	unknown	unknown	position	start	2	0	0	0	0	body	43	40	3	43	45	0	0	4.92
Yasa	Ape	Bonobo	female	3858	Sebastian	male	3	10	2	TD	Towards	different	unknown	unknown	visual	point	2	1	1	1	2	Finger/right	43	40	3	43	43	9	0	3.28
Yasa	Ape	Bonobo	female	3858	Sebastian	male	3	10	2	TD	Towards	different	unknown	unknown	position	switch	1	1	1	1	0	body	43	45	1	44	5	0	4.92	24.92
Yasa	Ape	Bonobo	female	3858	Sebastian	male	3	10	2	TD	Towards	different	unknown	unknown	visual	point	1	1	1	1	1	Finger/left	43	46	24	43	48	1	6.84	7.96
Yasa	Ape	Bonobo	female	3858	Sebastian	male	3	10	2	TD	Towards	different	unknown	unknown	visual	point	1	1	1	1	1	Finger/left	43	52	15	43	54	0	12.48	13.92
Yasa	Ape	Bonobo	female	3858	Sebastian	male	3	10	2	TD	Towards	different	unknown	unknown	position	switch	2	1	2	1	0	body	44	5	1	44	10	2	24.92	30
Yasa	Ape	Bonobo	female	3858	Sebastian	male	3	10	2	TD	Towards	different	unknown	unknown	visual	point	2	1	4	0	2	Finger/right	44	5	1	44	6	4	24.92	26.08
Yasa	Ape	Bonobo	female	3858	Sebastian	male	3	10	2	TD	Towards	different	unknown	unknown	visual	point	2	1	2	1	2	Finger/right	44	6	12	44	7	17	26.36	27.6
Yasa	Ape	Bonobo	female	3858	Sebastian	male	3	10	2	TD	Towards	different	unknown	unknown	visual	point	2	1	2	1	2	Finger/right	44	8	1	44	9	9	27.92	29.28
Yasa	Ape	Bonobo	female	3858	Sebastian	male	3	10	2	TD	Towards	different	unknown	unknown	visual	point	2	1	2	1	2	Finger/right	44	9	19	44	10	2	29.64	30
Yasa	Ape	Bonobo	female	3858	Sebastian	male	3	11	1	TS	Towards	same	unknown	unknown	position	start	1	0	0	0	0	body	49	16	16	49	46	15	0	30
Yasa	Ape	Bonobo	female	3858	Sebastian	male	3	11	1	TS	Towards	same	unknown	unknown	visual	point	1	1	1	1	1	Finger/right	49	16	16	49	19	6	0	2.64
Yasa	Ape	Bonobo	female	3858	Sebastian	male	3	11	1	TS	Towards	same	unknown	unknown	visual	shake head	1	1	1	1	4	head	49	16	16	49	17	22	0	1.28	nod
Yasa	Ape	Bonobo	female	3858	Sebastian	male	3	11	1	TS	Towards	same	unknown	unknown	visual	point	1	1	1	1	1	Finger/right	49	19	8	49	21	4	2.68	4.56
Yasa	Ape	Bonobo	female	3858	Sebastian	male	3	11	1	TS	Towards	same	unknown	unknown	visual	shake head	1	1	1	1	4	head	49	19	8	49	19	16	2.68	3.04	nod
Yasa	Ape	Bonobo	female	3858	Sebastian	male	3	11	1	TS	Towards	same	unknown	unknown	action	unknown	1	1	1	1	1	body	49	20	8	49	20	19	3.68	4.16
Yasa	Ape	Bonobo	female	3858	Sebastian	male	3	11	1	TS	Towards	same	unknown	unknown	action	touch	1	1	3	1	3	Finger/right	49	21	16	49	22	14	5	5.96
Yasa	Ape	Bonobo	female	3858	Sebastian	male	3	11	1	TS	Towards	same	unknown	unknown	visual	point	1	1	1	1	1	Finger/right	49	22	23	49	23	19	6.28	7.16
Yasa	Ape	Bonobo	female	3858	Sebastian	male	3	11	1	TS	Towards	same	unknown	unknown	visual	point	1	1	1	1	1	Finger/left	49	24	2	49	25	19	7.44	9.16
Yasa	Ape	Bonobo	female	3858	Sebastian	male	3	11	1	TS	Towards	same	unknown	unknown	visual	point	1	1	1	1	1	Finger/right	49	29	2	49	34	16	12.44	18.04
Yasa	Ape	Bonobo	female	3858	Sebastian	male	3	11	1	TS	Towards	same	unknown	unknown	visual	point	1	1	1	1	1	Finger/right	49	36	10	49	43	8	19.76	26.72
Yasa	Ape	Bonobo	female	3858	Sebastian	male	3	11	1	TS	Towards	same	unknown	unknown	visual	point	1	1	1	1	1	Finger/left	49	37	5	49	40	6	20.56	23.64
Yasa	Ape	Bonobo	female	3858	Sebastian	male	3	11	1	TS	Towards	same	unknown	unknown	visual	point	1	1	1	1	1	Finger/right	49	43	24	49	46	15	27.32	30
Yasa	Ape	Bonobo	female	3858	Sebastian	male	3	12	3	AS	Away	same	unknown	unknown	position	start	1	0	0	0	0	body	50	50	9	51	20	8	0	30
Yasa	Ape	Bonobo	female	3858	Sebastian	male	3	12	3	AS	Away	same	unknown	unknown	visual	point	1	1	1	1	1	Finger/left	51	5	16	51	7	14	15.28	17.24
Yasa	Ape	Bonobo	female	3858	Sebastian	male	3	12	3	AS	Away	same	unknown	unknown	visual	point	1	1	1	1	1	Finger/left	51	14	12	51	16	0	24.12	25.68
Yasa	Ape	Bonobo	female	3858	Sebastian	male	4	13	4	AD	Away	different	unknown	unknown	position	start	2	0	0	0	0	body	54	51	12	55	15	6	0	23.8
Yasa	Ape	Bonobo	female	3858	Sebastian	male	4	13	4	AD	Away	different	unknown	unknown	position	center	3	3	4	0	0	body	55	15	7	55	19	2	23.8	27.64
Yasa	Ape	Bonobo	female	3858	Sebastian	male	4	13	4	AD	Away	different	unknown	unknown	position	switch	1	3	4	0	0	body	55	19	3	55	21	11	27.64	30
Yasa	Ape	Bonobo	female	3858	Sebastian	male	4	14	1	TS	Towards	same	unknown	unknown	position	start	1	0	0	0	0	body	56	24	5	56	54	4	0	30
Yasa	Ape	Bonobo	female	3858	Sebastian	male	4	14	1	TS	Towards	same	unknown	unknown	visual	point	1	1	1	1	1	Finger/right	56	24	5	56	25	4	0	1
Yasa	Ape	Bonobo	female	3858	Sebastian	male	4	14	1	TS	Towards	same	unknown	unknown	visual	point	1	1	1	1	1	Finger/right	56	26	6	56	26	24	2.04	2.8
Yasa	Ape	Bonobo	female	3858	Sebastian	male	4	14	1	TS	Towards	same	unknown	unknown	visual	shake head	1	1	1	1	4	head	56	26	24	56	27	3	2.76	2.96	nod
Yasa	Ape	Bonobo	female	3858	Sebastian	male	4	14	1	TS	Towards	same	unknown	unknown	visual	point	1	1	1	1	1	Finger/left	56	27	5	56	27	20	3	3.64
Yasa	Ape	Bonobo	female	3858	Sebastian	male	4	14	1	TS	Towards	same	unknown	unknown	action	body rocking	1	1	1	1	1	body	56	27	20	56	28	23	3.6	4.76
Yasa	Ape	Bonobo	female	3858	Sebastian	male	4	14	1	TS	Towards	same	unknown	unknown	visual	point	1	1	1	1	1	Finger/left	56	28	23	56	31	8	4.72	7.16
Yasa	Ape	Bonobo	female	3858	Sebastian	male	4	14	1	TS	Towards	same	unknown	unknown	visual	trade	1	1	1	1	1	Finger/right	56	33	18	56	35	19	9.52	11.6
Yasa	Ape	Bonobo	female	3858	Sebastian	male	4	14	1	TS	Towards	same	unknown	unknown	visual	point	1	1	3	1	1	Finger/right	56	40	15	56	43	20	16.4	19.64
Yasa	Ape	Bonobo	female	3858	Sebastian	male	4	14	1	TS	Towards	same	unknown	unknown	visual	trade	1	1	1	1	1	Finger/left	56	46	12	56	49	8	22.28	25.16
Yasa	Ape	Bonobo	female	3858	Sebastian	male	4	14	1	TS	Towards	same	unknown	unknown	visual	shake head	1	1	1	1	4	head	56	49	8	56	54	4	25.12	30	nod
Yasa	Ape	Bonobo	female	3858	Sebastian	male	4	15	2	TD	Towards	different	unknown	unknown	position	start	2	0	0	0	0	body	57	39	19	57	41	18	0	2
Yasa	Ape	Bonobo	female	3858	Sebastian	male	4	15	2	TD	Towards	different	unknown	unknown	visual	point	2	1	1	1	2	Finger/right	57	39	19	57	40	24	0	1.24
Yasa	Ape	Bonobo	female	3858	Sebastian	male	4	15	2	TD	Towards	different	unknown	unknown	position	switch	1	1	1	1	0	body	57	41	19	57	52	3	2	12.4
Yasa	Ape	Bonobo	female	3858	Sebastian	male	4	15	2	TD	Towards	different	unknown	unknown	visual	point	1	1	1	1	1	Finger/right	57	41	19	57	42	2	2	2.36
Yasa	Ape	Bonobo	female	3858	Sebastian	male	4	15	2	TD	Towards	different	unknown	unknown	visual	shake head	1	1	1	1	4	head	57	49	1	57	50	18	9.28	11	nod
Yasa	Ape	Bonobo	female	3858	Sebastian	male	4	15	2	TD	Towards	different	unknown	unknown	position	switch	2	1	2	1	0	body	57	52	4	58	9	18	12.4	30
Yasa	Ape	Bonobo	female	3858	Sebastian	male	4	15	2	TD	Towards	different	unknown	unknown	visual	point	2	1	2	1	2	Finger/left	57	52	10	57	55	15	12.64	15.88
Yasa	Ape	Bonobo	female	3858	Sebastian	male	4	15	2	TD	Towards	different	unknown	unknown	action	touch	2	1	2	1	3	Finger/left	57	57	0	57	57	18	17.24	18
Yasa	Ape	Bonobo	female	3858	Sebastian	male	4	15	2	TD	Towards	different	unknown	unknown	visual	point	2	1	2	1	2	Finger/left	57	58	18	58	0	19	18.96	21.04
Yasa	Ape	Bonobo	female	3858	Sebastian	male	4	16	3	AS	Away	same	unknown	unknown	position	start	1	0	0	0	0	body	0	50	19	1	20	18	0	30
Yasa	Ape	Bonobo	female	3858	Sebastian	male	4	16	3	AS	Away	same	unknown	unknown	visual	point	1	1	3	1	1	Finger/left	1	2	15	1	3	10	11.84	12.68
Alex	Ape	Chimpanzee	male	3133	Sebastian	male	1	1	2	TD	Towards	different	unknown	unknown	position	start	3	0	0	0	0	body	0	43	18	0	44	9	0	0.68
Alex	Ape	Chimpanzee	male	3133	Sebastian	male	1	1	2	TD	Towards	different	unknown	unknown	position	switch	2	1	2	1	0	body	0	44	10	0	45	18	0.68	2.04
Alex	Ape	Chimpanzee	male	3133	Sebastian	male	1	1	2	TD	Towards	different	unknown	unknown	position	center	3	1	1	1	0	body	0	45	19	0	48	16	2.04	4.96
Alex	Ape	Chimpanzee	male	3133	Sebastian	male	1	1	2	TD	Towards	different	unknown	unknown	position	return	2	1	2	1	0	body	0	48	17	0	59	12	4.96	15.8
Alex	Ape	Chimpanzee	male	3133	Sebastian	male	1	1	2	TD	Towards	different	unknown	unknown	visual	point	3	1	1	1	1	Finger/right	0	46	13	0	47	22	2.8	4.2
Alex	Ape	Chimpanzee	male	3133	Sebastian	male	1	1	2	TD	Towards	different	unknown	unknown	visual	point	2	1	2	1	2	Finger/right	0	48	18	0	49	14	5	5.88
Alex	Ape	Chimpanzee	male	3133	Sebastian	male	1	1	2	TD	Towards	different	unknown	unknown	visual	point	2	1	2	1	2	Finger/left	0	49	20	0	50	9	6.08	6.68
Alex	Ape	Chimpanzee	male	3133	Sebastian	male	1	1	2	TD	Towards	different	unknown	unknown	visual	point	2	1	2	1	2	Finger/left	0	51	0	0	52	6	7.28	8.56
Alex	Ape	Chimpanzee	male	3133	Sebastian	male	1	1	2	TD	Towards	different	unknown	unknown	visual	point	2	1	2	1	2	Finger/left	0	52	12	0	53	1	8.76	9.36
Alex	Ape	Chimpanzee	male	3133	Sebastian	male	1	1	2	TD	Towards	different	unknown	unknown	visual	point	2	1	2	1	2	Finger/right	0	53	14	0	57	13	9.84	13.84
Alex	Ape	Chimpanzee	male	3133	Sebastian	male	1	1	2	TD	Towards	different	unknown	unknown	auditory	bang	2	1	1	1	3	Finger/right	0	58	0	0	58	11	14.28	14.76
Alex	Ape	Chimpanzee	male	3133	Sebastian	male	1	1	2	TD	Towards	different	unknown	unknown	position	switch	1	1	1	1	0	body	0	59	13	1	2	10	15.8	18.72
Alex	Ape	Chimpanzee	male	3133	Sebastian	male	1	1	2	TD	Towards	different	unknown	unknown	visual	point	1	1	1	1	1	Finger/left	1	0	0	1	1	6	16.28	17.56
Alex	Ape	Chimpanzee	male	3133	Sebastian	male	1	1	2	TD	Towards	different	unknown	unknown	position	switch	2	1	2	1	0	body	1	2	11	1	9	19	18.72	26.08
Alex	Ape	Chimpanzee	male	3133	Sebastian	male	1	1	2	TD	Towards	different	unknown	unknown	visual	point	2	1	2	1	2	Finger/right	1	2	13	1	5	15	18.8	21.92
Alex	Ape	Chimpanzee	male	3133	Sebastian	male	1	1	2	TD	Towards	different	unknown	unknown	visual	point	2	1	2	1	2	Finger/left	1	4	16	1	6	1	20.92	22.36
Alex	Ape	Chimpanzee	male	3133	Sebastian	male	1	1	2	TD	Towards	different	unknown	unknown	visual	point	2	1	2	1	2	Finger/right	1	6	15	1	7	16	22.88	23.96
Alex	Ape	Chimpanzee	male	3133	Sebastian	male	1	1	2	TD	Towards	different	unknown	unknown	position	switch	1	1	1	1	0	body	1	9	20	1	11	4	26.08	27.48
Alex	Ape	Chimpanzee	male	3133	Sebastian	male	1	1	2	TD	Towards	different	unknown	unknown	position	switch	2	1	2	1	0	body	1	11	5	1	13	17	27.48	30
Alex	Ape	Chimpanzee	male	3133	Sebastian	male	1	1	2	TD	Towards	different	unknown	unknown	visual	point	2	1	2	1	2	Finger/right	1	12	9	1	13	17	28.64	30
Alex	Ape	Chimpanzee	male	3133	Sebastian	male	1	2	3	AS	Away	same	unknown	unknown	position	start	1	0	0	0	0	body	2	2	23	2	29	6	0	26.36
Alex	Ape	Chimpanzee	male	3133	Sebastian	male	1	2	3	AS	Away	same	unknown	unknown	visual	point	1	1	1	1	1	Finger/left	2	13	6	2	17	11	10.32	14.56
Alex	Ape	Chimpanzee	male	3133	Sebastian	male	1	2	3	AS	Away	same	unknown	unknown	visual	point	1	1	1	1	1	Finger/right	2	16	20	2	17	11	13.88	14.56
Alex	Ape	Chimpanzee	male	3133	Sebastian	male	1	2	3	AS	Away	same	unknown	unknown	auditory	bang	1	1	3	1	3	Finger/right	2	20	3	2	21	10	17.2	18.52
Alex	Ape	Chimpanzee	male	3133	Sebastian	male	1	2	3	AS	Away	same	unknown	unknown	visual	point	1	1	1	1	1	Finger/right	2	24	1	2	27	22	21.12	25
Alex	Ape	Chimpanzee	male	3133	Sebastian	male	1	2	3	AS	Away	same	unknown	unknown	position	switch	1	2	2	1	0	body	2	29	7	2	32	10	26.36	29.52
Alex	Ape	Chimpanzee	male	3133	Sebastian	male	1	2	3	AS	Away	same	unknown	unknown	position	switch	1	1	1	1	0	body	2	32	11	2	32	22	29.52	30
Alex	Ape	Chimpanzee	male	3133	Sebastian	male	1	3	1	TS	Towards	same	unknown	unknown	position	start	1	0	0	0	0	body	3	18	19	3	48	18	0	30
Alex	Ape	Chimpanzee	male	3133	Sebastian	male	1	3	1	TS	Towards	same	unknown	unknown	visual	shake hand	1	1	1	1	4	hand/left	3	19	11	3	19	21	0.68	1.12
Alex	Ape	Chimpanzee	male	3133	Sebastian	male	1	3	1	TS	Towards	same	unknown	unknown	visual	point	1	1	1	1	1	Finger/right	3	20	3	3	25	22	1.36	7.16
Alex	Ape	Chimpanzee	male	3133	Sebastian	male	1	3	1	TS	Towards	same	unknown	unknown	visual	point	1	1	1	1	1	Finger/left	3	21	21	3	26	19	3.08	8.04
Alex	Ape	Chimpanzee	male	3133	Sebastian	male	1	3	1	TS	Towards	same	unknown	unknown	visual	point	1	1	1	1	1	Finger/right	3	26	4	3	26	19	7.4	8.04
Alex	Ape	Chimpanzee	male	3133	Sebastian	male	1	3	1	TS	Towards	same	unknown	unknown	visual	point	1	1	1	1	1	Finger/left	3	27	10	3	27	23	8.64	9.2
Alex	Ape	Chimpanzee	male	3133	Sebastian	male	1	3	1	TS	Towards	same	unknown	unknown	visual	point	1	1	1	1	1	Finger/left	3	28	5	3	28	13	9.44	9.8
Alex	Ape	Chimpanzee	male	3133	Sebastian	male	1	3	1	TS	Towards	same	unknown	unknown	visual	point	1	1	1	1	1	Finger/left	3	28	14	3	29	22	9.8	11.16
Alex	Ape	Chimpanzee	male	3133	Sebastian	male	1	3	1	TS	Towards	same	unknown	unknown	visual	point	1	1	1	1	1	Finger/left	3	30	5	3	32	15	11.44	13.88
Alex	Ape	Chimpanzee	male	3133	Sebastian	male	1	3	1	TS	Towards	same	unknown	unknown	visual	point	1	1	1	1	1	Finger/right	3	33	17	3	38	0	14.92	19.28
Alex	Ape	Chimpanzee	male	3133	Sebastian	male	1	3	1	TS	Towards	same	unknown	unknown	visual	point	1	1	1	1	1	Finger/left	3	38	16	3	39	3	19.88	20.4
Alex	Ape	Chimpanzee	male	3133	Sebastian	male	1	3	1	TS	Towards	same	unknown	unknown	visual	point	1	1	1	1	1	Finger/left	3	39	20	3	40	14	21.04	21.84
Alex	Ape	Chimpanzee	male	3133	Sebastian	male	1	3	1	TS	Towards	same	unknown	unknown	visual	point	1	1	1	1	1	Finger/right	3	41	13	3	45	13	22.76	26.8
Alex	Ape	Chimpanzee	male	3133	Sebastian	male	1	3	1	TS	Towards	same	unknown	unknown	visual	point	1	1	1	1	1	Finger/right	3	45	23	3	46	6	27.16	27.52
Alex	Ape	Chimpanzee	male	3133	Sebastian	male	1	3	1	TS	Towards	same	unknown	unknown	visual	point	1	1	1	1	1	Finger/left	3	46	16	3	48	18	27.88	30
Alex	Ape	Chimpanzee	male	3133	Sebastian	male	1	4	4	AD	Away	different	unknown	unknown	position	start	3	0	0	0	0	body	4	34	0	4	34	11	0	0.48
Alex	Ape	Chimpanzee	male	3133	Sebastian	male	1	4	4	AD	Away	different	unknown	unknown	position	switch	2	1	2	1	0	body	4	34	12	4	36	5	0.48	2.24
Alex	Ape	Chimpanzee	male	3133	Sebastian	male	1	4	4	AD	Away	different	unknown	unknown	position	switch	1	1	1	1	0	body	4	36	6	4	45	13	2.24	11.56
Alex	Ape	Chimpanzee	male	3133	Sebastian	male	1	4	4	AD	Away	different	unknown	unknown	position	center	3	1	2	1	0	body	4	45	14	4	49	0	11.56	15.04
Alex	Ape	Chimpanzee	male	3133	Sebastian	male	1	4	4	AD	Away	different	unknown	unknown	position	return	1	1	1	1	0	body	4	49	1	5	3	24	15.04	30
Alex	Ape	Chimpanzee	male	3133	Sebastian	male	1	4	4	AD	Away	different	unknown	unknown	action	touch	1	1	3	1	3	Finger/right	4	59	4	5	1	2	25.16	27.12
Alex	Ape	Chimpanzee	male	3133	Sebastian	male	2	5	3	AS	Away	same	unknown	unknown	position	start	3	0	0	0	0	body	8	0	20	8	1	19	0	1
Alex	Ape	Chimpanzee	male	3133	Sebastian	male	2	5	3	AS	Away	same	unknown	unknown	position	switch	2	1	2	1	0	body	8	1	20	8	13	3	1	12.36
Alex	Ape	Chimpanzee	male	3133	Sebastian	male	2	5	3	AS	Away	same	unknown	unknown	position	switch	1	1	1	1	0	body	8	13	4	8	14	14	12.36	13.8
Alex	Ape	Chimpanzee	male	3133	Sebastian	male	2	5	3	AS	Away	same	unknown	unknown	position	switch	2	1	2	1	0	body	8	14	15	8	28	23	13.8	28.16
Alex	Ape	Chimpanzee	male	3133	Sebastian	male	2	5	3	AS	Away	same	unknown	unknown	visual	point	2	1	2	1	2	Finger/left	8	17	4	8	20	5	16.36	19.44
Alex	Ape	Chimpanzee	male	3133	Sebastian	male	2	5	3	AS	Away	same	unknown	unknown	position	switch	1	1	1	1	0	body	8	28	24	8	30	19	28.16	30
Alex	Ape	Chimpanzee	male	3133	Sebastian	male	2	5	3	AS	Away	same	unknown	unknown	visual	point	1	1	1	1	1	Finger/right	8	30	3	8	30	19	29.32	30
Alex	Ape	Chimpanzee	male	3133	Sebastian	male	2	6	1	TS	Towards	same	unknown	unknown	position	start	1	0	0	0	0	body	9	11	23	9	41	22	0	30
Alex	Ape	Chimpanzee	male	3133	Sebastian	male	2	6	1	TS	Towards	same	unknown	unknown	visual	point	1	1	1	1	1	Finger/right	9	14	8	9	16	17	2.4	4.8
Alex	Ape	Chimpanzee	male	3133	Sebastian	male	2	6	1	TS	Towards	same	unknown	unknown	visual	point	1	1	1	1	1	Finger/right	9	16	23	9	17	12	5	5.6
Alex	Ape	Chimpanzee	male	3133	Sebastian	male	2	6	1	TS	Towards	same	unknown	unknown	auditory	bang	1	1	1	1	1	hand/left	9	17	13	9	19	3	5.6	7.24
Alex	Ape	Chimpanzee	male	3133	Sebastian	male	2	6	1	TS	Towards	same	unknown	unknown	visual	point	1	1	1	1	1	Finger/right	9	22	12	9	25	4	10.56	13.28
Alex	Ape	Chimpanzee	male	3133	Sebastian	male	2	6	1	TS	Towards	same	unknown	unknown	visual	point	1	1	1	1	1	Finger/left	9	26	0	9	27	12	14.08	15.6
Alex	Ape	Chimpanzee	male	3133	Sebastian	male	2	6	1	TS	Towards	same	unknown	unknown	visual	shake hand	1	1	1	1	4	hand/left	9	27	15	9	30	8	15.68	18.44
Alex	Ape	Chimpanzee	male	3133	Sebastian	male	2	6	1	TS	Towards	same	unknown	unknown	visual	point	1	1	1	1	1	Finger/right	9	28	4	9	28	20	16.24	16.92
Alex	Ape	Chimpanzee	male	3133	Sebastian	male	2	6	1	TS	Towards	same	unknown	unknown	visual	point	1	1	1	1	1	Finger/right	9	30	8	9	31	14	18.4	19.68
Alex	Ape	Chimpanzee	male	3133	Sebastian	male	2	6	1	TS	Towards	same	unknown	unknown	visual	point	1	1	1	1	1	Finger/right	9	32	23	9	33	15	21	21.72
Alex	Ape	Chimpanzee	male	3133	Sebastian	male	2	6	1	TS	Towards	same	unknown	unknown	visual	shake hand	1	1	1	1	4	hand/left	9	34	9	9	34	21	22.44	22.96
Alex	Ape	Chimpanzee	male	3133	Sebastian	male	2	6	1	TS	Towards	same	unknown	unknown	auditory	body slap	1	1	1	1	4	hand/right	9	34	21	9	35	17	22.92	23.8
Alex	Ape	Chimpanzee	male	3133	Sebastian	male	2	6	1	TS	Towards	same	unknown	unknown	auditory	jump	1	1	1	1	1	body	9	39	9	9	41	6	27.44	29.36
Alex	Ape	Chimpanzee	male	3133	Sebastian	male	2	7	2	TD	Towards	different	unknown	unknown	position	start	1	0	0	0	0	body	10	26	11	10	27	18	0	1.32
Alex	Ape	Chimpanzee	male	3133	Sebastian	male	2	7	2	TD	Towards	different	unknown	unknown	position	switch	2	1	2	1	0	body	10	27	19	10	29	14	1.32	3.16
Alex	Ape	Chimpanzee	male	3133	Sebastian	male	2	7	2	TD	Towards	different	unknown	unknown	position	switch	1	1	1	1	0	body	10	29	15	10	56	10	3.16	30
Alex	Ape	Chimpanzee	male	3133	Sebastian	male	2	7	2	TD	Towards	different	unknown	unknown	visual	point	1	1	1	1	1	Finger/right	10	30	14	10	32	9	4.12	5.96
Alex	Ape	Chimpanzee	male	3133	Sebastian	male	2	7	2	TD	Towards	different	unknown	unknown	visual	point	1	1	1	1	1	Finger/right	10	43	9	10	43	23	16.92	17.52
Alex	Ape	Chimpanzee	male	3133	Sebastian	male	2	8	4	AD	Away	different	unknown	unknown	position	start	2	0	0	0	0	body	11	58	20	12	1	16	0	2.88
Alex	Ape	Chimpanzee	male	3133	Sebastian	male	2	8	4	AD	Away	different	unknown	unknown	visual	point	2	1	2	1	2	Finger/right	11	59	17	12	0	15	0.88	1.84
Alex	Ape	Chimpanzee	male	3133	Sebastian	male	2	8	4	AD	Away	different	unknown	unknown	position	center	3	1	1	1	0	body	12	1	17	12	2	21	2.88	4.08
Alex	Ape	Chimpanzee	male	3133	Sebastian	male	2	8	4	AD	Away	different	unknown	unknown	position	return	2	1	2	1	0	body	12	2	22	12	15	24	4.08	17.2
Alex	Ape	Chimpanzee	male	3133	Sebastian	male	2	8	4	AD	Away	different	unknown	unknown	auditory	bang	2	1	3	1	3	Finger/right	12	5	0	12	5	19	6.2	7
Alex	Ape	Chimpanzee	male	3133	Sebastian	male	2	8	4	AD	Away	different	unknown	unknown	position	center	3	1	1	1	0	body	12	16	0	12	17	11	17.2	18.68
Alex	Ape	Chimpanzee	male	3133	Sebastian	male	2	8	4	AD	Away	different	unknown	unknown	position	return	2	1	2	1	0	body	12	17	12	12	28	19	18.68	30
Alex	Ape	Chimpanzee	male	2577	Sebastian	male	3	9	3	AS	Away	same	unknown	unknown	position	start	1	0	0	0	0	body	27	51	2	27	54	3	0	3.08
Alex	Ape	Chimpanzee	male	2577	Sebastian	male	3	9	3	AS	Away	same	unknown	unknown	position	center	3	1	4	0	0	body	27	54	4	27	55	19	3.08	4.72
Alex	Ape	Chimpanzee	male	2577	Sebastian	male	3	9	3	AS	Away	same	unknown	unknown	position	return	1	2	1	1	0	body	27	55	20	27	59	17	4.72	8.64
Alex	Ape	Chimpanzee	male	2577	Sebastian	male	3	9	3	AS	Away	same	unknown	unknown	position	switch	2	1	2	1	0	body	27	59	18	28	1	7	8.64	10.24
Alex	Ape	Chimpanzee	male	2577	Sebastian	male	3	9	3	AS	Away	same	unknown	unknown	position	switch	1	2	4	0	0	body	28	1	8	28	3	3	10.24	12.08
Alex	Ape	Chimpanzee	male	2577	Sebastian	male	3	9	3	AS	Away	same	unknown	unknown	position	leave	4	0	0	0	0	body	28	3	4	28	21	1	12.08	30
Alex	Ape	Chimpanzee	male	2577	Sebastian	male	3	10	2	TD	Towards	different	unknown	unknown	position	start	2	0	0	0	0	body	29	23	14	29	24	21	0	1.32
Alex	Ape	Chimpanzee	male	2577	Sebastian	male	3	10	2	TD	Towards	different	unknown	unknown	position	switch	1	1	1	1	0	body	29	24	22	29	31	19	1.32	8.24
Alex	Ape	Chimpanzee	male	2577	Sebastian	male	3	10	2	TD	Towards	different	unknown	unknown	visual	point	1	1	1	1	1	Finger/right	29	26	2	29	27	22	2.52	4.36
Alex	Ape	Chimpanzee	male	2577	Sebastian	male	3	10	2	TD	Towards	different	unknown	unknown	visual	point	1	1	1	1	1	Finger/right	29	29	13	29	30	11	5.96	6.92
Alex	Ape	Chimpanzee	male	2577	Sebastian	male	3	10	2	TD	Towards	different	unknown	unknown	position	switch	2	1	2	1	0	body	29	31	20	29	38	22	8.24	15.36
Alex	Ape	Chimpanzee	male	2577	Sebastian	male	3	10	2	TD	Towards	different	unknown	unknown	visual	request	2	1	2	1	2	Finger/right	29	32	9	29	32	16	8.8	9.12
Alex	Ape	Chimpanzee	male	2577	Sebastian	male	3	10	2	TD	Towards	different	unknown	unknown	visual	request	2	1	2	1	2	Finger/right	29	37	5	29	37	21	13.64	14.32
Alex	Ape	Chimpanzee	male	2577	Sebastian	male	3	10	2	TD	Towards	different	unknown	unknown	position	switch	1	1	1	1	0	body	29	38	23	29	53	13	15.36	30
Alex	Ape	Chimpanzee	male	2577	Sebastian	male	3	10	2	TD	Towards	different	unknown	unknown	visual	point	1	1	1	1	1	Finger/right	29	41	10	29	42	15	17.84	19.08
Alex	Ape	Chimpanzee	male	2577	Sebastian	male	3	10	2	TD	Towards	different	unknown	unknown	auditory	bang	1	1	1	1	1	hand/left	29	46	17	29	47	21	23.12	24.32	2x
Alex	Ape	Chimpanzee	male	2577	Sebastian	male	3	10	2	TD	Towards	different	unknown	unknown	action	touch	1	1	3	1	3	Finger/right	29	49	13	29	50	1	25.96	26.52
Alex	Ape	Chimpanzee	male	2577	Sebastian	male	3	11	4	AD	Away	different	unknown	unknown	position	start	2	0	0	0	0	body	30	55	5	30	56	18	0	1.56
Alex	Ape	Chimpanzee	male	2577	Sebastian	male	3	11	4	AD	Away	different	unknown	unknown	position	center	3	1	1	1	0	body	30	56	19	30	57	11	1.56	2.28
Alex	Ape	Chimpanzee	male	2577	Sebastian	male	3	11	4	AD	Away	different	unknown	unknown	position	return	2	1	2	1	0	body	30	57	12	31	2	1	2.28	6.88
Alex	Ape	Chimpanzee	male	2577	Sebastian	male	3	11	4	AD	Away	different	unknown	unknown	position	switch	1	1	1	1	0	body	31	2	2	31	3	20	6.88	8.64
Alex	Ape	Chimpanzee	male	2577	Sebastian	male	3	11	4	AD	Away	different	unknown	unknown	position	switch	2	1	2	1	0	body	31	3	21	31	7	11	8.64	12.28
Alex	Ape	Chimpanzee	male	2577	Sebastian	male	3	11	4	AD	Away	different	unknown	unknown	position	leave	4	0	0	0	0	body	31	7	12	31	23	11	12.28	28.28
Alex	Ape	Chimpanzee	male	2577	Sebastian	male	3	11	4	AD	Away	different	unknown	unknown	position	approach	2	2	4	0	0	body	31	23	12	31	25	4	28.28	30
Alex	Ape	Chimpanzee	male	2577	Sebastian	male	3	12	1	TS	Towards	same	unknown	unknown	position	start	4	0	0	0	0	body	32	29	20	32	35	6	0	5.48
Alex	Ape	Chimpanzee	male	2577	Sebastian	male	3	12	1	TS	Towards	same	unknown	unknown	position	approach	2	1	4	0	0	body	32	35	7	32	36	6	5.48	6.48
Alex	Ape	Chimpanzee	male	2577	Sebastian	male	3	12	1	TS	Towards	same	unknown	unknown	position	center	3	1	1	1	0	body	32	36	7	32	38	4	6.48	8.4
Alex	Ape	Chimpanzee	male	2577	Sebastian	male	3	12	1	TS	Towards	same	unknown	unknown	position	return	2	1	2	1	0	body	32	38	5	32	59	19	8.4	30
Alex	Ape	Chimpanzee	male	2577	Sebastian	male	3	12	1	TS	Towards	same	unknown	unknown	visual	point	2	1	2	1	2	Finger/right	32	39	15	32	40	1	9.8	10.28
Alex	Ape	Chimpanzee	male	2577	Sebastian	male	3	12	1	TS	Towards	same	unknown	unknown	visual	point	2	1	2	1	2	Finger/right	32	41	12	32	42	7	11.68	12.52
Alex	Ape	Chimpanzee	male	2577	Sebastian	male	3	12	1	TS	Towards	same	unknown	unknown	action	touch	2	1	3	1	3	Finger/left	32	40	4	32	40	11	10.36	10.68
Alex	Ape	Chimpanzee	male	2577	Sebastian	male	3	12	1	TS	Towards	same	unknown	unknown	visual	shake hand	2	1	2	1	4	hand/left	32	45	6	32	46	15	15.44	16.84
Alex	Ape	Chimpanzee	male	2577	Sebastian	male	4	13	3	AS	Away	same	unknown	unknown	position	start	1	0	0	0	0	body	36	9	21	36	12	1	0	2.24
[truncated: 2,599 more rows]

## Sheet: DurationOfStay
group	species	subj	sex	age	exp_ori	relPos	cond	exp_ori.code	relPos.code	sess	trial	z.trial	EXP	OTH	MID	OFF
Human	Human	222811	female	601	Away	different	AD	0	0	1	1	-1.40626	5.68	14.32	0	0
Human	Human	222811	female	601	Away	different	AD	0	0	2	8	0.121385	0	20	0	0
Human	Human	222811	female	601	Away	same	AS	0	1	1	3	-0.969787	20	0	0	0
Human	Human	222811	female	601	Away	same	AS	0	1	2	6	-0.315084	12.24	7.76	0	0
Human	Human	222811	female	601	Towards	different	TD	1	0	1	2	-1.18802	12.36	7.64	0	0
Human	Human	222811	female	601	Towards	different	TD	1	0	2	7	-0.0968496	0	20	0	0
Human	Human	222811	female	601	Towards	same	TS	1	1	1	4	-0.751553	3.44	16.56	0	0
Human	Human	222811	female	601	Towards	same	TS	1	1	2	5	-0.533318	20	0	0	0
Human	Human	222831	male	613	Away	different	AD	0	0	1	2	-1.18802	17.88	2.12	0	0
Human	Human	222831	male	613	Away	different	AD	0	0	2	7	-0.0968496	18.32	1.68	0	0
Human	Human	222831	male	613	Away	same	AS	0	1	1	4	-0.751553	20	0	0	0
Human	Human	222831	male	613	Away	same	AS	0	1	2	5	-0.533318	20	0	0	0
Human	Human	222831	male	613	Towards	different	TD	1	0	1	1	-1.40626	20	0	0	0
Human	Human	222831	male	613	Towards	same	TS	1	1	1	3	-0.969787	3.56	16.44	0	0
Human	Human	222831	male	613	Towards	same	TS	1	1	2	6	-0.315084	20	0	0	0
Human	Human	222961	female	620	Away	different	AD	0	0	1	3	-0.969787	15.2	4.8	0	0
Human	Human	222961	female	620	Away	different	AD	0	0	2	6	-0.315084	0	20	0	0
Human	Human	222961	female	620	Away	same	AS	0	1	1	2	-1.18802	20	0	0	0
Human	Human	222961	female	620	Away	same	AS	0	1	2	7	-0.0968496	3.68	16.32	0	0
Human	Human	222961	female	620	Towards	different	TD	1	0	1	1	-1.40626	2.8	17.2	0	0
Human	Human	222961	female	620	Towards	different	TD	1	0	2	8	0.121385	0	0	20	0
Human	Human	222961	female	620	Towards	same	TS	1	1	1	4	-0.751553	2.44	17.56	0	0
Human	Human	222961	female	620	Towards	same	TS	1	1	2	5	-0.533318	20	0	0	0
Human	Human	224591	male	620	Away	different	AD	0	0	1	4	-0.751553	20	0	0	0
Human	Human	224591	male	620	Away	different	AD	0	0	2	5	-0.533318	0	20	0	0
Human	Human	224591	male	620	Away	same	AS	0	1	1	2	-1.18802	20	0	0	0
Human	Human	224591	male	620	Away	same	AS	0	1	2	7	-0.0968496	20	0	0	0
Human	Human	224591	male	620	Towards	different	TD	1	0	1	1	-1.40626	2.96	17.04	0	0
Human	Human	224591	male	620	Towards	different	TD	1	0	2	8	0.121385	15.64	4.36	0	0
Human	Human	224591	male	620	Towards	same	TS	1	1	1	3	-0.969787	20	0	0	0
Human	Human	224591	male	620	Towards	same	TS	1	1	2	6	-0.315084	20	0	0	0
Human	Human	225971	male	595	Away	different	AD	0	0	1	4	-0.751553	0	20	0	0
Human	Human	225971	male	595	Away	different	AD	0	0	2	5	-0.533318	20	0	0	0
Human	Human	225971	male	595	Away	same	AS	0	1	1	1	-1.40626	20	0	0	0
Human	Human	225971	male	595	Away	same	AS	0	1	2	8	0.121385	20	0	0	0
Human	Human	225971	male	595	Towards	different	TD	1	0	1	2	-1.18802	19.12	0.88	0	0
Human	Human	225971	male	595	Towards	different	TD	1	0	2	7	-0.0968496	20	0	0	0
Human	Human	225971	male	595	Towards	same	TS	1	1	1	3	-0.969787	20	0	0	0
Human	Human	225971	male	595	Towards	same	TS	1	1	2	6	-0.315084	20	0	0	0
Human	Human	226031	female	623	Away	different	AD	0	0	1	4	-0.751553	0	20	0	0
Human	Human	226031	female	623	Away	different	AD	0	0	2	5	-0.533318	0	20	0	0
Human	Human	226031	female	623	Away	same	AS	0	1	1	2	-1.18802	20	0	0	0
Human	Human	226031	female	623	Away	same	AS	0	1	2	7	-0.0968496	20	0	0	0
Human	Human	226031	female	623	Towards	different	TD	1	0	1	3	-0.969787	20	0	0	0
Human	Human	226031	female	623	Towards	different	TD	1	0	2	6	-0.315084	0	20	0	0
Human	Human	226031	female	623	Towards	same	TS	1	1	1	1	-1.40626	20	0	0	0
Human	Human	226761	female	616	Away	different	AD	0	0	1	2	-1.18802	14.28	5.72	0	0
Human	Human	226761	female	616	Away	same	AS	0	1	1	3	-0.969787	13.6	6.4	0	0
Human	Human	226761	female	616	Towards	different	TD	1	0	1	4	-0.751553	0	20	0	0
Human	Human	226761	female	616	Towards	same	TS	1	1	1	1	-1.40626	20	0	0	0
Human	Human	226791	female	611	Away	different	AD	0	0	1	2	-1.18802	17	3	0	0
Human	Human	226791	female	611	Away	same	AS	0	1	1	3	-0.969787	20	0	0	0
Human	Human	226791	female	611	Towards	different	TD	1	0	1	1	-1.40626	1.8	18.2	0	0
Human	Human	226791	female	611	Towards	same	TS	1	1	1	4	-0.751553	17.48	2.52	0	0
Human	Human	226991	female	594	Away	different	AD	0	0	1	3	-0.969787	7.2	12.8	0	0
Human	Human	226991	female	594	Away	different	AD	0	0	2	6	-0.315084	1.56	18.44	0	0
Human	Human	226991	female	594	Away	same	AS	0	1	1	4	-0.751553	12.8	7.2	0	0
Human	Human	226991	female	594	Away	same	AS	0	1	2	5	-0.533318	20	0	0	0
Human	Human	226991	female	594	Towards	different	TD	1	0	1	2	-1.18802	0	20	0	0
Human	Human	226991	female	594	Towards	different	TD	1	0	2	7	-0.0968496	0	20	0	0
Human	Human	226991	female	594	Towards	same	TS	1	1	1	1	-1.40626	14.24	5.76	0	0
Human	Human	226991	female	594	Towards	same	TS	1	1	2	8	0.121385	0	20	0	0
Human	Human	227711	female	602	Away	different	AD	0	0	1	4	-0.751553	7.08	12.92	0	0
Human	Human	227711	female	602	Away	different	AD	0	0	2	5	-0.533318	14.32	0	0	0
Human	Human	227711	female	602	Away	same	AS	0	1	1	1	-1.40626	8.4	11.6	0	0
Human	Human	227711	female	602	Away	same	AS	0	1	2	8	0.121385	20	0	0	0
Human	Human	227711	female	602	Towards	different	TD	1	0	1	3	-0.969787	17.36	2.64	0	0
Human	Human	227711	female	602	Towards	different	TD	1	0	2	6	-0.315084	20	0	0	0
Human	Human	227711	female	602	Towards	same	TS	1	1	1	2	-1.18802	20	0	0	0
Human	Human	227711	female	602	Towards	same	TS	1	1	2	7	-0.0968496	15.8	4.2	0	0
Human	Human	228261	male	602	Away	different	AD	0	0	1	1	-1.40626	4.2	15.8	0	0
Human	Human	228261	male	602	Away	same	AS	0	1	1	4	-0.751553	10.36	9.64	0	0
Human	Human	228261	male	602	Away	same	AS	0	1	2	5	-0.533318	13.44	6.56	0	0
Human	Human	228261	male	602	Towards	different	TD	1	0	1	3	-0.969787	12.12	7.88	0	0
Human	Human	228261	male	602	Towards	same	TS	1	1	1	2	-1.18802	8.12	8.8	3.08	0
Human	Human	228341	male	593	Away	different	AD	0	0	1	3	-0.969787	20	0	0	0
Human	Human	228341	male	593	Away	different	AD	0	0	2	6	-0.315084	15.4	4.6	0	0
Human	Human	228341	male	593	Away	same	AS	0	1	1	1	-1.40626	20	0	0	0
Human	Human	228341	male	593	Away	same	AS	0	1	2	8	0.121385	20	0	0	0
Human	Human	228341	male	593	Towards	different	TD	1	0	1	2	-1.18802	19.52	0.48	0	0
Human	Human	228341	male	593	Towards	different	TD	1	0	2	7	-0.0968496	11.72	8.28	0	0
Human	Human	228341	male	593	Towards	same	TS	1	1	1	4	-0.751553	20	0	0	0
Human	Human	228341	male	593	Towards	same	TS	1	1	2	5	-0.533318	20	0	0	0
Human	Human	228351	male	602	Away	different	AD	0	0	1	2	-1.18802	11.56	8.44	0	0
Human	Human	228351	male	602	Away	different	AD	0	0	2	7	-0.0968496	13.76	6.24	0	0
Human	Human	228351	male	602	Away	same	AS	0	1	1	4	-0.751553	0	20	0	0
Human	Human	228351	male	602	Away	same	AS	0	1	2	5	-0.533318	15.16	4.84	0	0
Human	Human	228351	male	602	Towards	different	TD	1	0	1	3	-0.969787	13.2	6.8	0	0
Human	Human	228351	male	602	Towards	different	TD	1	0	2	6	-0.315084	17.04	2.96	0	0
Human	Human	228351	male	602	Towards	same	TS	1	1	1	1	-1.40626	14.72	5.28	0	0
Human	Human	228351	male	602	Towards	same	TS	1	1	2	8	0.121385	16.64	3.36	0	0
Human	Human	228501	male	601	Away	different	AD	0	0	1	1	-1.40626	11.68	8.32	0	0
Human	Human	228501	male	601	Away	same	AS	0	1	1	2	-1.18802	20	0	0	0
Human	Human	228501	male	601	Away	same	AS	0	1	2	7	-0.0968496	14.32	5.68	0	0
Human	Human	228501	male	601	Towards	different	TD	1	0	1	4	-0.751553	3.52	16.48	0	0
Human	Human	228501	male	601	Towards	different	TD	1	0	2	6	-0.315084	11.16	8.84	0	0
Human	Human	228501	male	601	Towards	same	TS	1	1	1	3	-0.969787	20	0	0	0
Human	Human	228501	male	601	Towards	same	TS	1	1	2	5	-0.533318	5.8	14.2	0	0
Human	Human	228571	female	608	Away	different	AD	0	0	1	3	-0.969787	20	0	0	0
Human	Human	228571	female	608	Away	different	AD	0	0	2	6	-0.315084	20	0	0	0
Human	Human	228571	female	608	Away	same	AS	0	1	1	4	-0.751553	15.8	4.2	0	0
Human	Human	228571	female	608	Away	same	AS	0	1	2	5	-0.533318	20	0	0	0
Human	Human	228571	female	608	Towards	different	TD	1	0	1	1	-1.40626	20	0	0	0
Human	Human	228571	female	608	Towards	different	TD	1	0	2	8	0.121385	11.48	8.52	0	0
Human	Human	228571	female	608	Towards	same	TS	1	1	1	2	-1.18802	20	0	0	0
Human	Human	228571	female	608	Towards	same	TS	1	1	2	7	-0.0968496	20	0	0	0
Human	Human	228831	male	602	Away	different	AD	0	0	1	3	-0.969787	0	20	0	0
Human	Human	228831	male	602	Away	same	AS	0	1	1	1	-1.40626	0	20	0	0
Human	Human	228831	male	602	Towards	different	TD	1	0	1	4	-0.751553	15.28	4.72	0	0
Human	Human	228831	male	602	Towards	different	TD	1	0	2	5	-0.533318	0	20	0	0
Human	Human	228831	male	602	Towards	same	TS	1	1	1	2	-1.18802	20	0	0	0
Human	Human	229041	male	601	Away	different	AD	0	0	1	1	-1.40626	20	0	0	0
Human	Human	229041	male	601	Away	different	AD	0	0	2	8	0.121385	20	0	0	0
Human	Human	229041	male	601	Away	same	AS	0	1	1	4	-0.751553	20	0	0	0
Human	Human	229041	male	601	Away	same	AS	0	1	2	5	-0.533318	11.68	8.32	0	0
Human	Human	229041	male	601	Towards	different	TD	1	0	1	2	-1.18802	10.04	9.96	0	0
Human	Human	229041	male	601	Towards	different	TD	1	0	2	7	-0.0968496	9.48	10.52	0	0
Human	Human	229041	male	601	Towards	same	TS	1	1	1	3	-0.969787	20	0	0	0
Human	Human	229041	male	601	Towards	same	TS	1	1	2	6	-0.315084	20	0	0	0
Human	Human	229151	female	596	Away	different	AD	0	0	1	1	-1.40626	20	0	0	0
Human	Human	229151	female	596	Away	same	AS	0	1	1	3	-0.969787	20	0	0	0
Human	Human	229151	female	596	Towards	different	TD	1	0	1	4	-0.751553	20	0	0	0
Human	Human	229151	female	596	Towards	same	TS	1	1	1	2	-1.18802	20	0	0	0
Human	Human	230481	female	606	Away	different	AD	0	0	1	4	-0.751553	0	20	0	0
Human	Human	230481	female	606	Away	different	AD	0	0	2	5	-0.533318	20	0	0	0
Human	Human	230481	female	606	Away	same	AS	0	1	1	3	-0.969787	20	0	0	0
Human	Human	230481	female	606	Away	same	AS	0	1	2	6	-0.315084	0	20	0	0
Human	Human	230481	female	606	Towards	different	TD	1	0	1	1	-1.40626	20	0	0	0
Human	Human	230481	female	606	Towards	different	TD	1	0	2	7	-0.0968496	20	0	0	0
Human	Human	230481	female	606	Towards	same	TS	1	1	1	2	-1.18802	0.96	19.04	0	0
Human	Human	230741	male	612	Away	different	AD	0	0	1	4	-0.751553	2.32	17.68	0	0
Human	Human	230741	male	612	Away	different	AD	0	0	2	5	-0.533318	7.56	12.44	0	0
Human	Human	230741	male	612	Away	same	AS	0	1	1	3	-0.969787	19.72	0.28	0	0
Human	Human	230741	male	612	Towards	different	TD	1	0	1	2	-1.18802	9.56	10.44	0	0
Human	Human	230741	male	612	Towards	same	TS	1	1	1	1	-1.40626	16.28	3.72	0	0
Human	Human	232261	male	613	Away	different	AD	0	0	1	3	-0.969787	9.32	10.68	0	0
Human	Human	232261	male	613	Away	different	AD	0	0	2	6	-0.315084	20	0	0	0
Human	Human	232261	male	613	Away	same	AS	0	1	1	2	-1.18802	0	20	0	0
Human	Human	232261	male	613	Towards	different	TD	1	0	1	4	-0.751553	13.16	6.84	0	0
Human	Human	232261	male	613	Towards	different	TD	1	0	2	5	-0.533318	20	0	0	0
Human	Human	232261	male	613	Towards	same	TS	1	1	1	1	-1.40626	20	0	0	0
Human	Human	233831	female	612	Away	different	AD	0	0	1	2	-1.18802	0	20	0	0
Human	Human	233831	female	612	Away	different	AD	0	0	2	7	-0.0968496	0	20	0	0
Human	Human	233831	female	612	Away	same	AS	0	1	1	1	-1.40626	20	0	0	0
Human	Human	233831	female	612	Away	same	AS	0	1	2	8	0.121385	0	14.72	5.28	0
Human	Human	233831	female	612	Towards	different	TD	1	0	1	4	-0.751553	0	20	0	0
Human	Human	233831	female	612	Towards	different	TD	1	0	2	5	-0.533318	20	0	0	0
Human	Human	233831	female	612	Towards	same	TS	1	1	1	3	-0.969787	8.48	11.52	0	0
Human	Human	233831	female	612	Towards	same	TS	1	1	2	6	-0.315084	20	0	0	0
Human	Human	236642	male	620	Away	different	AD	0	0	1	1	-1.40626	19.28	0.72	0	0
Human	Human	236642	male	620	Away	same	AS	0	1	1	2	-1.18802	20	0	0	0
Human	Human	236642	male	620	Away	same	AS	0	1	2	7	-0.0968496	20	0	0	0
Human	Human	236642	male	620	Towards	different	TD	1	0	1	3	-0.969787	19.24	0.76	0	0
Human	Human	236642	male	620	Towards	different	TD	1	0	2	6	-0.315084	7.2	12.8	0	0
Human	Human	236642	male	620	Towards	same	TS	1	1	1	4	-0.751553	5.08	14.92	0	0
Human	Human	236642	male	620	Towards	same	TS	1	1	2	5	-0.533318	14.12	5.88	0	0
Human	Human	236889	female	600	Away	different	AD	0	0	1	2	-1.18802	20	0	0	0
Human	Human	236889	female	600	Away	different	AD	0	0	2	7	-0.0968496	0	20	0	0
Human	Human	236889	female	600	Away	same	AS	0	1	1	1	-1.40626	20	0	0	0
Human	Human	236889	female	600	Away	same	AS	0	1	2	8	0.121385	0	20	0	0
Human	Human	236889	female	600	Towards	different	TD	1	0	1	3	-0.969787	0	20	0	0
Human	Human	236889	female	600	Towards	different	TD	1	0	2	6	-0.315084	20	0	0	0
Human	Human	236889	female	600	Towards	same	TS	1	1	1	4	-0.751553	0	20	0	0
Human	Human	236889	female	600	Towards	same	TS	1	1	2	5	-0.533318	20	0	0	0
Ape	Bonobo	Joey	male	9228	Away	different	AD	0	0	1	1	-1.40626	3.48	26.52	0	0
Ape	Bonobo	Joey	male	9228	Away	different	AD	0	0	2	6	-0.315084	0	30	0	0
Ape	Bonobo	Joey	male	9228	Away	same	AS	0	1	1	4	-0.751553	30	0	0	0
Ape	Bonobo	Joey	male	9228	Away	same	AS	0	1	2	8	0.121385	30	0	0	0
Ape	Bonobo	Joey	male	9228	Towards	different	TD	1	0	1	2	-1.18802	0	30	0	0
Ape	Bonobo	Joey	male	9228	Towards	different	TD	1	0	2	5	-0.533318	26.8	3.2	0	0
Ape	Bonobo	Joey	male	9228	Towards	same	TS	1	1	1	3	-0.969787	30	0	0	0
Ape	Bonobo	Joey	male	9228	Towards	same	TS	1	1	2	7	-0.0968496	30	0	0	0
Ape	Bonobo	Joey	male	9229	Away	different	AD	0	0	3	11	0.776088	0	30	0	0
Ape	Bonobo	Joey	male	9229	Away	different	AD	0	0	4	14	1.43079	0	2.88	27.12	0
Ape	Bonobo	Joey	male	9229	Away	same	AS	0	1	3	12	0.994322	28.96	0	1.04	0
Ape	Bonobo	Joey	male	9229	Away	same	AS	0	1	4	15	1.64903	30	0	0	0
Ape	Bonobo	Joey	male	9229	Towards	different	TD	1	0	3	10	0.557853	0	30	0	0
Ape	Bonobo	Joey	male	9229	Towards	different	TD	1	0	4	13	1.21256	0	30	0	0
Ape	Bonobo	Joey	male	9229	Towards	same	TS	1	1	3	9	0.339619	30	0	0	0
Ape	Bonobo	Joey	male	9229	Towards	same	TS	1	1	4	16	1.86726	30	0	0	0
Ape	Bonobo	Kuno	male	4131	Away	different	AD	0	0	1	4	-0.751553	0	30	0	0
Ape	Bonobo	Kuno	male	4131	Away	different	AD	0	0	2	7	-0.0968496	0	24.52	5.48	0
Ape	Bonobo	Kuno	male	4131	Away	same	AS	0	1	1	2	-1.18802	6.84	0	23.16	0
Ape	Bonobo	Kuno	male	4131	Away	same	AS	0	1	2	8	0.121385	30	0	0	0
Ape	Bonobo	Kuno	male	4131	Towards	different	TD	1	0	1	3	-0.969787	0	30	0	0
Ape	Bonobo	Kuno	male	4131	Towards	different	TD	1	0	2	5	-0.533318	0	26.92	3.08	0
Ape	Bonobo	Kuno	male	4131	Towards	same	TS	1	1	1	1	-1.40626	30	0	0	0
Ape	Bonobo	Kuno	male	4131	Towards	same	TS	1	1	2	6	-0.315084	21.24	1.68	7.08	0
Ape	Bonobo	Kuno	male	4132	Away	different	AD	0	0	3	11	0.776088	0	0	30	0
Ape	Bonobo	Kuno	male	4132	Away	different	AD	0	0	4	15	1.64903	0	30	0	0
Ape	Bonobo	Kuno	male	4132	Away	same	AS	0	1	3	9	0.339619	0	30	0	0
Ape	Bonobo	Kuno	male	4132	Away	same	AS	0	1	4	16	1.86726	30	0	0	0
Ape	Bonobo	Kuno	male	4132	Towards	different	TD	1	0	3	12	0.994322	0	30	0	0
Ape	Bonobo	Kuno	male	4132	Towards	different	TD	1	0	4	13	1.21256	0	0	0	30
Ape	Bonobo	Kuno	male	4132	Towards	same	TS	1	1	3	10	0.557853	30	0	0	0
Ape	Bonobo	Kuno	male	4132	Towards	same	TS	1	1	4	14	1.43079	0	0	30	0
Ape	Bonobo	Limbuko	male	4550	Away	different	AD	0	0	1	3	-0.969787	5.4	24.6	0	0
Ape	Bonobo	Limbuko	male	4550	Away	different	AD	0	0	2	6	-0.315084	0	0	0	30
Ape	Bonobo	Limbuko	male	4550	Away	same	AS	0	1	1	2	-1.18802	25.76	4.24	0	0
Ape	Bonobo	Limbuko	male	4550	Away	same	AS	0	1	2	8	0.121385	0	0	0	30
Ape	Bonobo	Limbuko	male	4550	Towards	different	TD	1	0	1	4	-0.751553	20.72	7.16	2.12	0
Ape	Bonobo	Limbuko	male	4550	Towards	different	TD	1	0	2	5	-0.533318	0	0	0	30
Ape	Bonobo	Limbuko	male	4550	Towards	same	TS	1	1	1	1	-1.40626	30	0	0	0
Ape	Bonobo	Limbuko	male	4550	Towards	same	TS	1	1	2	7	-0.0968496	30	0	0	0
Ape	Bonobo	Limbuko	male	4551	Away	different	AD	0	0	3	11	0.776088	0	0	0	30
Ape	Bonobo	Limbuko	male	4551	Away	different	AD	0	0	4	13	1.21256	0	30	0	0
Ape	Bonobo	Limbuko	male	4551	Away	same	AS	0	1	3	10	0.557853	30	0	0	0
Ape	Bonobo	Limbuko	male	4551	Away	same	AS	0	1	4	14	1.43079	0	26.92	3.08	0
Ape	Bonobo	Limbuko	male	4551	Towards	different	TD	1	0	3	12	0.994322	0	0	0	30
Ape	Bonobo	Limbuko	male	4551	Towards	different	TD	1	0	4	15	1.64903	0	30	0	0
Ape	Bonobo	Limbuko	male	4551	Towards	same	TS	1	1	3	9	0.339619	28.28	1.72	0	0
Ape	Bonobo	Limbuko	male	4551	Towards	same	TS	1	1	4	16	1.86726	2.6	20.96	6.44	0
Ape	Bonobo	Ulindi	female	5274	Away	different	AD	0	0	1	2	-1.18802	0	30	0	0
Ape	Bonobo	Ulindi	female	5274	Away	different	AD	0	0	2	8	0.121385	15.44	14.56	0	0
Ape	Bonobo	Ulindi	female	5274	Away	same	AS	0	1	1	4	-0.751553	17.12	0	12.88	0
Ape	Bonobo	Ulindi	female	5274	Away	same	AS	0	1	2	6	-0.315084	7.92	22.08	0	0
Ape	Bonobo	Ulindi	female	5274	Towards	different	TD	1	0	1	3	-0.969787	28.68	1.32	0	0
Ape	Bonobo	Ulindi	female	5274	Towards	different	TD	1	0	2	5	-0.533318	8.32	21.68	0	0
Ape	Bonobo	Ulindi	female	5274	Towards	same	TS	1	1	1	1	-1.40626	30	0	0	0
Ape	Bonobo	Ulindi	female	5274	Towards	same	TS	1	1	2	7	-0.0968496	30	0	0	0
Ape	Bonobo	Ulindi	female	5275	Away	different	AD	0	0	3	9	0.339619	27.24	2.76	0	0
Ape	Bonobo	Ulindi	female	5275	Away	different	AD	0	0	4	16	1.86726	0	19.96	10.04	0
Ape	Bonobo	Ulindi	female	5275	Away	same	AS	0	1	3	10	0.557853	30	0	0	0
Ape	Bonobo	Ulindi	female	5275	Away	same	AS	0	1	4	14	1.43079	29.8	0.2	0	0
Ape	Bonobo	Ulindi	female	5275	Towards	different	TD	1	0	3	12	0.994322	19.28	3.72	7	0
Ape	Bonobo	Ulindi	female	5275	Towards	different	TD	1	0	4	13	1.21256	9.4	20.6	0	0
Ape	Bonobo	Ulindi	female	5275	Towards	same	TS	1	1	3	11	0.776088	21.84	0	8.16	0
Ape	Bonobo	Ulindi	female	5275	Towards	same	TS	1	1	4	15	1.64903	19	0	11	0
Ape	Bonobo	Yasa	female	3857	Away	different	AD	0	0	1	4	-0.751553	30	0	0	0
Ape	Bonobo	Yasa	female	3857	Away	different	AD	0	0	2	6	-0.315084	22.72	6.4	0.88	0
Ape	Bonobo	Yasa	female	3857	Away	same	AS	0	1	1	1	-1.40626	11.08	18.92	0	0
Ape	Bonobo	Yasa	female	3857	Away	same	AS	0	1	2	8	0.121385	30	0	0	0
Ape	Bonobo	Yasa	female	3857	Towards	different	TD	1	0	1	3	-0.969787	28.68	1.32	0	0
Ape	Bonobo	Yasa	female	3857	Towards	different	TD	1	0	2	5	-0.533318	2.96	27.04	0	0
Ape	Bonobo	Yasa	female	3857	Towards	same	TS	1	1	1	2	-1.18802	30	0	0	0
Ape	Bonobo	Yasa	female	3857	Towards	same	TS	1	1	2	7	-0.0968496	30	0	0	0
Ape	Bonobo	Yasa	female	3858	Away	different	AD	0	0	3	9	0.339619	0	30	0	0
Ape	Bonobo	Yasa	female	3858	Away	different	AD	0	0	4	13	1.21256	2.36	23.8	3.84	0
Ape	Bonobo	Yasa	female	3858	Away	same	AS	0	1	3	12	0.994322	30	0	0	0
Ape	Bonobo	Yasa	female	3858	Away	same	AS	0	1	4	16	1.86726	30	0	0	0
Ape	Bonobo	Yasa	female	3858	Towards	different	TD	1	0	3	10	0.557853	20	10	0	0
Ape	Bonobo	Yasa	female	3858	Towards	different	TD	1	0	4	15	1.64903	10.4	19.6	0	0
Ape	Bonobo	Yasa	female	3858	Towards	same	TS	1	1	3	11	0.776088	30	0	0	0
Ape	Bonobo	Yasa	female	3858	Towards	same	TS	1	1	4	14	1.43079	30	0	0	0
Ape	Chimpanzee	Alex	male	2577	Away	different	AD	0	0	3	11	0.776088	1.76	11.52	0.72	16
Ape	Chimpanzee	Alex	male	2577	Away	different	AD	0	0	4	15	1.64903	17.96	5.8	0	6.24
Ape	Chimpanzee	Alex	male	2577	Away	same	AS	0	1	3	9	0.339619	8.84	1.6	1.64	17.92
Ape	Chimpanzee	Alex	male	2577	Away	same	AS	0	1	4	13	1.21256	21.2	4.76	4.04	0
Ape	Chimpanzee	Alex	male	2577	Towards	different	TD	1	0	3	10	0.557853	21.56	8.44	0	0
Ape	Chimpanzee	Alex	male	2577	Towards	different	TD	1	0	4	16	1.86726	15.04	13.52	1.44	0
Ape	Chimpanzee	Alex	male	2577	Towards	same	TS	1	1	3	12	0.994322	0	22.6	1.92	5.48
Ape	Chimpanzee	Alex	male	2577	Towards	same	TS	1	1	4	14	1.43079	30	0	0	0
Ape	Chimpanzee	Alex	male	3133	Away	different	AD	0	0	1	4	-0.751553	24.28	1.76	3.96	0
Ape	Chimpanzee	Alex	male	3133	Away	different	AD	0	0	2	8	0.121385	0	27.32	2.68	0
Ape	Chimpanzee	Alex	male	3133	Away	same	AS	0	1	1	2	-1.18802	30	0	0	0
Ape	Chimpanzee	Alex	male	3133	Away	same	AS	0	1	2	5	-0.533318	3.28	25.72	1	0
Ape	Chimpanzee	Alex	male	3133	Towards	different	TD	1	0	1	1	-1.40626	4.32	22.08	3.6	0
Ape	Chimpanzee	Alex	male	3133	Towards	different	TD	1	0	2	7	-0.0968496	28.16	1.84	0	0
Ape	Chimpanzee	Alex	male	3133	Towards	same	TS	1	1	1	3	-0.969787	30	0	0	0
Ape	Chimpanzee	Alex	male	3133	Towards	same	TS	1	1	2	6	-0.315084	30	0	0	0
Ape	Chimpanzee	Alexandra	female	3133	Away	different	AD	0	0	1	1	-1.40626	1.08	0	0	28.92
Ape	Chimpanzee	Alexandra	female	3133	Away	different	AD	0	0	2	8	0.121385	0	15.76	0	14.24
Ape	Chimpanzee	Alexandra	female	3133	Away	same	AS	0	1	1	3	-0.969787	5.36	11.12	0	13.52
Ape	Chimpanzee	Alexandra	female	3133	Away	same	AS	0	1	2	6	-0.315084	1.4	4.44	0	24.16
Ape	Chimpanzee	Alexandra	female	3133	Towards	different	TD	1	0	1	2	-1.18802	14.52	15.48	0	0
Ape	Chimpanzee	Alexandra	female	3133	Towards	different	TD	1	0	2	7	-0.0968496	2.84	0	0	27.16
Ape	Chimpanzee	Alexandra	female	3133	Towards	same	TS	1	1	1	4	-0.751553	7.72	5.68	16.6	0
Ape	Chimpanzee	Alexandra	female	3133	Towards	same	TS	1	1	2	5	-0.533318	12.96	0	0	17.04
Ape	Chimpanzee	Alexandra	female	3135	Away	different	AD	0	0	3	11	0.776088	2.56	22.32	5.12	0
Ape	Chimpanzee	Alexandra	female	3135	Away	different	AD	0	0	4	15	1.64903	16.44	12.56	1	0
Ape	Chimpanzee	Alexandra	female	3135	Away	same	AS	0	1	3	10	0.557853	30	0	0	0
Ape	Chimpanzee	Alexandra	female	3135	Away	same	AS	0	1	4	14	1.43079	30	0	0	0
Ape	Chimpanzee	Alexandra	female	3135	Towards	different	TD	1	0	3	12	0.994322	3.08	23	3.92	0
Ape	Chimpanzee	Alexandra	female	3135	Towards	different	TD	1	0	4	13	1.21256	1.4	20.84	0	7.76
Ape	Chimpanzee	Alexandra	female	3135	Towards	same	TS	1	1	3	9	0.339619	30	0	0	0
Ape	Chimpanzee	Alexandra	female	3135	Towards	same	TS	1	1	4	16	1.86726	30	0	0	0
Ape	Chimpanzee	Annett	female	3133	Away	different	AD	0	0	1	1	-1.40626	30	0	0	0
Ape	Chimpanzee	Annett	female	3133	Away	different	AD	0	0	2	7	-0.0968496	26.48	1.6	1.92	0
Ape	Chimpanzee	Annett	female	3133	Away	same	AS	0	1	1	3	-0.969787	30	0	0	0
Ape	Chimpanzee	Annett	female	3133	Away	same	AS	0	1	2	8	0.121385	0	24.4	0	5.6
Ape	Chimpanzee	Annett	female	3133	Towards	different	TD	1	0	1	2	-1.18802	0	30	0	0
Ape	Chimpanzee	Annett	female	3133	Towards	different	TD	1	0	2	5	-0.533318	27.96	2.04	0	0
Ape	Chimpanzee	Annett	female	3133	Towards	same	TS	1	1	1	4	-0.751553	30	0	0	0
Ape	Chimpanzee	Annett	female	3133	Towards	same	TS	1	1	2	6	-0.315084	30	0	0	0
Ape	Chimpanzee	Annett	female	3137	Away	different	AD	0	0	3	12	0.994322	3.92	26.08	0	0
Ape	Chimpanzee	Annett	female	3137	Away	different	AD	0	0	4	13	1.21256	0	30	0	0
Ape	Chimpanzee	Annett	female	3137	Away	same	AS	0	1	3	10	0.557853	30	0	0	0
Ape	Chimpanzee	Annett	female	3137	Away	same	AS	0	1	4	16	1.86726	30	0	0	0
Ape	Chimpanzee	Annett	female	3137	Towards	different	TD	1	0	3	9	0.339619	7.48	17.88	4.64	0
Ape	Chimpanzee	Annett	female	3137	Towards	different	TD	1	0	4	15	1.64903	16.52	13.48	0	0
Ape	Chimpanzee	Annett	female	3137	Towards	same	TS	1	1	3	11	0.776088	30	0	0	0
Ape	Chimpanzee	Annett	female	3137	Towards	same	TS	1	1	4	14	1.43079	30	0	0	0
Ape	Chimpanzee	Corrie	female	11447	Away	different	AD	0	0	1	4	-0.751553	0	23.84	6.16	0
Ape	Chimpanzee	Corrie	female	11447	Away	different	AD	0	0	2	5	-0.533318	17.32	8.12	4.56	0
Ape	Chimpanzee	Corrie	female	11447	Away	same	AS	0	1	1	2	-1.18802	24.76	3.32	1.92	0
Ape	Chimpanzee	Corrie	female	11447	Away	same	AS	0	1	2	7	-0.0968496	30	0	0	0
Ape	Chimpanzee	Corrie	female	11447	Towards	different	TD	1	0	1	3	-0.969787	11.64	18.36	0	0
Ape	Chimpanzee	Corrie	female	11447	Towards	different	TD	1	0	2	8	0.121385	11.64	14.44	3.92	0
Ape	Chimpanzee	Corrie	female	11447	Towards	same	TS	1	1	1	1	-1.40626	23.68	4.16	2.16	0
Ape	Chimpanzee	Corrie	female	11447	Towards	same	TS	1	1	2	6	-0.315084	30	0	0	0
Ape	Chimpanzee	Corrie	female	11448	Away	different	AD	0	0	3	12	0.994322	0	21.84	8.16	0
Ape	Chimpanzee	Corrie	female	11448	Away	different	AD	0	0	4	13	1.21256	5.92	20.16	3.92	0
Ape	Chimpanzee	Corrie	female	11448	Away	same	AS	0	1	3	11	0.776088	25.76	4.24	0	0
Ape	Chimpanzee	Corrie	female	11448	Away	same	AS	0	1	4	16	1.86726	26.72	3.28	0	0
Ape	Chimpanzee	Corrie	female	11448	Towards	different	TD	1	0	3	10	0.557853	0	24.08	5.92	0
Ape	Chimpanzee	Corrie	female	11448	Towards	different	TD	1	0	4	15	1.64903	4.2	23.28	2.52	0
Ape	Chimpanzee	Corrie	female	11448	Towards	same	TS	1	1	3	9	0.339619	30	0	0	0
Ape	Chimpanzee	Corrie	female	11448	Towards	same	TS	1	1	4	14	1.43079	30	0	0	0
Ape	Chimpanzee	Doreen	female	10038	Away	different	AD	0	0	1	3	-0.969787	21.36	8.64	0	0
Ape	Chimpanzee	Doreen	female	10038	Away	different	AD	0	0	2	7	-0.0968496	2.6	27.4	0	0
Ape	Chimpanzee	Doreen	female	10038	Away	same	AS	0	1	1	1	-1.40626	30	0	0	0
Ape	Chimpanzee	Doreen	female	10038	Away	same	AS	0	1	2	6	-0.315084	23.8	6.2	0	0
Ape	Chimpanzee	Doreen	female	10038	Towards	different	TD	1	0	1	4	-0.751553	2.88	27.12	0	0
Ape	Chimpanzee	Doreen	female	10038	Towards	different	TD	1	0	2	8	0.121385	16.24	13.16	0.6	0
Ape	Chimpanzee	Doreen	female	10038	Towards	same	TS	1	1	1	2	-1.18802	30	0	0	0
Ape	Chimpanzee	Doreen	female	10038	Towards	same	TS	1	1	2	5	-0.533318	17.12	12.6	0.28	0
Ape	Chimpanzee	Doreen	female	10055	Away	different	AD	0	0	3	12	0.994322	23.96	5.32	0.72	0
Ape	Chimpanzee	Doreen	female	10055	Away	different	AD	0	0	4	15	1.64903	4.68	18.68	6.64	0
Ape	Chimpanzee	Doreen	female	10055	Away	same	AS	0	1	3	11	0.776088	8.56	19	2.44	0
Ape	Chimpanzee	Doreen	female	10055	Away	same	AS	0	1	4	14	1.43079	19.8	10.2	0	0
Ape	Chimpanzee	Doreen	female	10055	Towards	different	TD	1	0	3	9	0.339619	2.56	27.44	0	0
Ape	Chimpanzee	Doreen	female	10055	Towards	different	TD	1	0	4	13	1.21256	20.04	9.2	0.76	0
Ape	Chimpanzee	Doreen	female	10055	Towards	same	TS	1	1	3	10	0.557853	21.12	8.88	0	0
Ape	Chimpanzee	Doreen	female	10055	Towards	same	TS	1	1	4	16	1.86726	3.08	26.56	0.36	0
Ape	Chimpanzee	Fraukje	female	11697	Away	different	AD	0	0	1	2	-1.18802	5.72	24.28	0	0
Ape	Chimpanzee	Fraukje	female	11697	Away	different	AD	0	0	2	7	-0.0968496	12.84	17.16	0	0
Ape	Chimpanzee	Fraukje	female	11697	Away	same	AS	0	1	1	4	-0.751553	25.56	4.44	0	0
Ape	Chimpanzee	Fraukje	female	11697	Away	same	AS	0	1	2	6	-0.315084	24.4	5.6	0	0
Ape	Chimpanzee	Fraukje	female	11697	Towards	different	TD	1	0	1	1	-1.40626	4.44	25.56	0	0
Ape	Chimpanzee	Fraukje	female	11697	Towards	different	TD	1	0	2	8	0.121385	20.92	9.08	0	0
Ape	Chimpanzee	Fraukje	female	11697	Towards	same	TS	1	1	1	3	-0.969787	30	0	0	0
Ape	Chimpanzee	Fraukje	female	11697	Towards	same	TS	1	1	2	5	-0.533318	30	0	0	0
Ape	Chimpanzee	Fraukje	female	11715	Away	different	AD	0	0	3	9	0.339619	3.88	26.12	0	0
Ape	Chimpanzee	Fraukje	female	11715	Away	different	AD	0	0	4	14	1.43079	0	0	30	0
Ape	Chimpanzee	Fraukje	female	11715	Away	same	AS	0	1	3	11	0.776088	2.96	27.04	0	0
Ape	Chimpanzee	Fraukje	female	11715	Away	same	AS	0	1	4	16	1.86726	26.32	3.68	0	0
Ape	Chimpanzee	Fraukje	female	11715	Towards	different	TD	1	0	3	12	0.994322	30	0	0	0
Ape	Chimpanzee	Fraukje	female	11715	Towards	different	TD	1	0	4	15	1.64903	16.12	1.96	11.92	0
Ape	Chimpanzee	Fraukje	female	11715	Towards	same	TS	1	1	3	10	0.557853	30	0	0	0
Ape	Chimpanzee	Fraukje	female	11715	Towards	same	TS	1	1	4	13	1.21256	21	9	0	0
Ape	Chimpanzee	Frodo	male	5252	Away	different	AD	0	0	1	2	-1.18802	0	30	0	0
Ape	Chimpanzee	Frodo	male	5252	Away	different	AD	0	0	2	8	0.121385	3.96	26.04	0	0
Ape	Chimpanzee	Frodo	male	5252	Away	same	AS	0	1	1	3	-0.969787	30	0	0	0
Ape	Chimpanzee	Frodo	male	5252	Away	same	AS	0	1	2	6	-0.315084	22.56	0	7.44	0
Ape	Chimpanzee	Frodo	male	5252	Towards	different	TD	1	0	1	1	-1.40626	19.72	0	10.28	0
Ape	Chimpanzee	Frodo	male	5252	Towards	different	TD	1	0	2	5	-0.533318	0	30	0	0
Ape	Chimpanzee	Frodo	male	5252	Towards	same	TS	1	1	1	4	-0.751553	30	0	0	0
Ape	Chimpanzee	Frodo	male	5252	Towards	same	TS	1	1	2	7	-0.0968496	30	0	0	0
Ape	Chimpanzee	Frodo	male	5270	Away	different	AD	0	0	3	11	0.776088	12.88	17.12	0	0
Ape	Chimpanzee	Frodo	male	5270	Away	different	AD	0	0	4	13	1.21256	3.44	26.56	0	0
Ape	Chimpanzee	Frodo	male	5270	Away	same	AS	0	1	3	12	0.994322	22.6	6.64	0.76	0
Ape	Chimpanzee	Frodo	male	5270	Away	same	AS	0	1	4	15	1.64903	16.64	13.36	0	0
Ape	Chimpanzee	Frodo	male	5270	Towards	different	TD	1	0	3	9	0.339619	22.8	0.92	6.28	0
Ape	Chimpanzee	Frodo	male	5270	Towards	different	TD	1	0	4	16	1.86726	3.36	25.68	0.96	0
Ape	Chimpanzee	Frodo	male	5270	Towards	same	TS	1	1	3	10	0.557853	30	0	0	0
Ape	Chimpanzee	Frodo	male	5270	Towards	same	TS	1	1	4	14	1.43079	10.64	5.48	13.88	0
Ape	Chimpanzee	Lome	male	2439	Away	different	AD	0	0	1	2	-1.18802	11.72	18.28	0	0
Ape	Chimpanzee	Lome	male	2439	Away	different	AD	0	0	2	8	0.121385	4.16	25.84	0	0
Ape	Chimpanzee	Lome	male	2439	Away	same	AS	0	1	1	1	-1.40626	22.2	7.8	0	0
Ape	Chimpanzee	Lome	male	2439	Away	same	AS	0	1	2	6	-0.315084	14.96	15.04	0	0
Ape	Chimpanzee	Lome	male	2439	Towards	different	TD	1	0	1	4	-0.751553	9.04	20.96	0	0
Ape	Chimpanzee	Lome	male	2439	Towards	different	TD	1	0	2	5	-0.533318	3.12	26.88	0	0
Ape	Chimpanzee	Lome	male	2439	Towards	same	TS	1	1	1	3	-0.969787	30	0	0	0
Ape	Chimpanzee	Lome	male	2439	Towards	same	TS	1	1	2	7	-0.0968496	30	0	0	0
Ape	Chimpanzee	Lome	male	2440	Away	different	AD	0	0	3	10	0.557853	8.88	17.6	3.52	0
Ape	Chimpanzee	Lome	male	2440	Away	different	AD	0	0	4	16	1.86726	6.88	20.6	2.52	0
Ape	Chimpanzee	Lome	male	2440	Away	same	AS	0	1	3	12	0.994322	26.84	0	3.16	0
Ape	Chimpanzee	Lome	male	2440	Away	same	AS	0	1	4	13	1.21256	22.12	5.84	2.04	0
Ape	Chimpanzee	Lome	male	2440	Towards	different	TD	1	0	3	9	0.339619	8.84	21.16	0	0
Ape	Chimpanzee	Lome	male	2440	Towards	different	TD	1	0	4	14	1.43079	2.16	27.84	0	0
Ape	Chimpanzee	Lome	male	2440	Towards	same	TS	1	1	3	11	0.776088	20.16	1.68	8.16	0
Ape	Chimpanzee	Lome	male	2440	Towards	same	TS	1	1	4	15	1.64903	23.52	5.4	1.08	0
Ape	Chimpanzee	Natascha	female	10246	Away	different	AD	0	0	1	2	-1.18802	30	0	0	0
Ape	Chimpanzee	Natascha	female	10246	Away	different	AD	0	0	2	7	-0.0968496	10.04	19.96	0	0
Ape	Chimpanzee	Natascha	female	10246	Away	same	AS	0	1	1	3	-0.969787	6.36	23.64	0	0
Ape	Chimpanzee	Natascha	female	10246	Away	same	AS	0	1	2	6	-0.315084	30	0	0	0
Ape	Chimpanzee	Natascha	female	10246	Towards	different	TD	1	0	1	1	-1.40626	5.6	24.4	0	0
Ape	Chimpanzee	Natascha	female	10246	Towards	different	TD	1	0	2	8	0.121385	30	0	0	0
Ape	Chimpanzee	Natascha	female	10246	Towards	same	TS	1	1	1	4	-0.751553	30	0	0	0
Ape	Chimpanzee	Natascha	female	10246	Towards	same	TS	1	1	2	5	-0.533318	14.8	14.24	0.96	0
Ape	Chimpanzee	Natascha	female	10263	Away	different	AD	0	0	3	12	0.994322	4	25.56	0.44	0
Ape	Chimpanzee	Natascha	female	10263	Away	different	AD	0	0	4	13	1.21256	29.72	0	0.28	0
Ape	Chimpanzee	Natascha	female	10263	Away	same	AS	0	1	3	10	0.557853	9.2	20.8	0	0
Ape	Chimpanzee	Natascha	female	10263	Away	same	AS	0	1	4	16	1.86726	30	0	0	0
Ape	Chimpanzee	Natascha	female	10263	Towards	different	TD	1	0	3	11	0.776088	29.08	0	0.92	0
Ape	Chimpanzee	Natascha	female	10263	Towards	different	TD	1	0	4	15	1.64903	12.36	17.64	0	0
Ape	Chimpanzee	Natascha	female	10263	Towards	same	TS	1	1	3	9	0.339619	30	0	0	0
Ape	Chimpanzee	Natascha	female	10263	Towards	same	TS	1	1	4	14	1.43079	29.6	0	0.4	0
Ape	Chimpanzee	Patrick	male	3965	Away	different	AD	0	0	1	3	-0.969787	0	26.4	3.6	0
Ape	Chimpanzee	Patrick	male	3965	Away	different	AD	0	0	2	8	0.121385	30	0	0	0
Ape	Chimpanzee	Patrick	male	3965	Away	same	AS	0	1	1	4	-0.751553	0	27.76	2.24	0
Ape	Chimpanzee	Patrick	male	3965	Away	same	AS	0	1	2	5	-0.533318	30	0	0	0
Ape	Chimpanzee	Patrick	male	3965	Towards	different	TD	1	0	1	1	-1.40626	21.12	8.88	0	0
Ape	Chimpanzee	Patrick	male	3965	Towards	different	TD	1	0	2	6	-0.315084	0	24.6	5.4	0
Ape	Chimpanzee	Patrick	male	3965	Towards	same	TS	1	1	1	2	-1.18802	30	0	0	0
Ape	Chimpanzee	Patrick	male	3965	Towards	same	TS	1	1	2	7	-0.0968496	0	16.16	13.84	0
Ape	Chimpanzee	Patrick	male	4009	Away	different	AD	0	0	3	11	0.776088	3.8	26.2	0	0
Ape	Chimpanzee	Patrick	male	4009	Away	different	AD	0	0	4	15	1.64903	22.24	7.24	0.52	0
Ape	Chimpanzee	Patrick	male	4009	Away	same	AS	0	1	3	12	0.994322	5.24	24.76	0	0
Ape	Chimpanzee	Patrick	male	4009	Away	same	AS	0	1	4	14	1.43079	30	0	0	0
Ape	Chimpanzee	Patrick	male	4009	Towards	different	TD	1	0	3	10	0.557853	20.44	9.56	0	0
Ape	Chimpanzee	Patrick	male	4009	Towards	different	TD	1	0	4	13	1.21256	2.16	27.84	0	0
Ape	Chimpanzee	Patrick	male	4009	Towards	same	TS	1	1	3	9	0.339619	23.4	3.32	3.28	0
Ape	Chimpanzee	Patrick	male	4009	Towards	same	TS	1	1	4	16	1.86726	20.64	7.8	1.56	0
Ape	Chimpanzee	Pia	female	3132	Away	different	AD	0	0	1	4	-0.751553	30	0	0	0
Ape	Chimpanzee	Pia	female	3132	Away	different	AD	0	0	2	5	-0.533318	10.68	19.32	0	0
Ape	Chimpanzee	Pia	female	3132	Away	same	AS	0	1	1	1	-1.40626	26.48	3.52	0	0
Ape	Chimpanzee	Pia	female	3132	Away	same	AS	0	1	2	8	0.121385	15.8	11.68	2.52	0
Ape	Chimpanzee	Pia	female	3132	Towards	different	TD	1	0	1	2	-1.18802	6.32	23.68	0	0
Ape	Chimpanzee	Pia	female	3132	Towards	different	TD	1	0	2	7	-0.0968496	20.64	4.24	5.12	0
Ape	Chimpanzee	Pia	female	3132	Towards	same	TS	1	1	1	3	-0.969787	30	0	0	0
Ape	Chimpanzee	Pia	female	3132	Towards	same	TS	1	1	2	6	-0.315084	30	0	0	0
Ape	Chimpanzee	Pia	female	3152	Away	different	AD	0	0	3	12	0.994322	24.68	5.32	0	0
Ape	Chimpanzee	Pia	female	3152	Away	different	AD	0	0	4	14	1.43079	8.2	21.8	0	0
Ape	Chimpanzee	Pia	female	3152	Away	same	AS	0	1	3	9	0.339619	29.44	0	0.56	0
Ape	Chimpanzee	Pia	female	3152	Away	same	AS	0	1	4	13	1.21256	23.48	6.52	0	0
Ape	Chimpanzee	Pia	female	3152	Towards	different	TD	1	0	3	11	0.776088	6.2	16.08	7.72	0
Ape	Chimpanzee	Pia	female	3152	Towards	different	TD	1	0	4	16	1.86726	15.12	6.44	8.44	0
Ape	Chimpanzee	Pia	female	3152	Towards	same	TS	1	1	3	10	0.557853	24.28	5.12	0.6	0
Ape	Chimpanzee	Pia	female	3152	Towards	same	TS	1	1	4	15	1.64903	30	0	0	0
Ape	Chimpanzee	Riet	female	11114	Away	different	AD	0	0	1	4	-0.751553	10.68	19.32	0	0
Ape	Chimpanzee	Riet	female	11114	Away	different	AD	0	0	2	5	-0.533318	22.88	7.12	0	0
Ape	Chimpanzee	Riet	female	11114	Away	same	AS	0	1	1	3	-0.969787	23	7	0	0
Ape	Chimpanzee	Riet	female	11114	Away	same	AS	0	1	2	8	0.121385	28.92	0	1.08	0
Ape	Chimpanzee	Riet	female	11114	Towards	different	TD	1	0	1	2	-1.18802	6.4	23.6	0	0
Ape	Chimpanzee	Riet	female	11114	Towards	different	TD	1	0	2	6	-0.315084	16.08	13.92	0	0
Ape	Chimpanzee	Riet	female	11114	Towards	same	TS	1	1	1	1	-1.40626	15.76	14.24	0	0
Ape	Chimpanzee	Riet	female	11114	Towards	same	TS	1	1	2	7	-0.0968496	30	0	0	0
Ape	Chimpanzee	Riet	female	11131	Away	different	AD	0	0	3	9	0.339619	21.24	8.76	0	0
Ape	Chimpanzee	Riet	female	11131	Away	different	AD	0	0	4	16	1.86726	0	30	0	0
Ape	Chimpanzee	Riet	female	11131	Away	same	AS	0	1	3	10	0.557853	30	0	0	0
Ape	Chimpanzee	Riet	female	11131	Away	same	AS	0	1	4	15	1.64903	30	0	0	0
Ape	Chimpanzee	Riet	female	11131	Towards	different	TD	1	0	3	11	0.776088	0	30	0	0
Ape	Chimpanzee	Riet	female	11131	Towards	different	TD	1	0	4	14	1.43079	14.32	15.68	0	0
Ape	Chimpanzee	Riet	female	11131	Towards	same	TS	1	1	3	12	0.994322	19.32	10.68	0	0
Ape	Chimpanzee	Riet	female	11131	Towards	same	TS	1	1	4	13	1.21256	30	0	0	0
Ape	Chimpanzee	Robert	male	11824	Away	different	AD	0	0	1	3	-0.969787	0	30	0	0
Ape	Chimpanzee	Robert	male	11824	Away	different	AD	0	0	2	7	-0.0968496	0	26.64	3.36	0
Ape	Chimpanzee	Robert	male	11824	Away	same	AS	0	1	1	1	-1.40626	30	0	0	0
Ape	Chimpanzee	Robert	male	11824	Away	same	AS	0	1	2	5	-0.533318	30	0	0	0
Ape	Chimpanzee	Robert	male	11824	Towards	different	TD	1	0	1	2	-1.18802	0	26.92	3.08	0
Ape	Chimpanzee	Robert	male	11824	Towards	different	TD	1	0	2	8	0.121385	0	30	0	0
Ape	Chimpanzee	Robert	male	11824	Towards	same	TS	1	1	1	4	-0.751553	30	0	0	0
Ape	Chimpanzee	Robert	male	11824	Towards	same	TS	1	1	2	6	-0.315084	30	0	0	0
Ape	Chimpanzee	Robert	male	11825	Away	different	AD	0	0	3	10	0.557853	0	30	0	0
Ape	Chimpanzee	Robert	male	11825	Away	different	AD	0	0	4	13	1.21256	0	30	0	0
Ape	Chimpanzee	Robert	male	11825	Away	same	AS	0	1	3	12	0.994322	30	0	0	0
Ape	Chimpanzee	Robert	male	11825	Away	same	AS	0	1	4	14	1.43079	30	0	0	0
Ape	Chimpanzee	Robert	male	11825	Towards	different	TD	1	0	3	11	0.776088	0	30	0	0
Ape	Chimpanzee	Robert	male	11825	Towards	different	TD	1	0	4	15	1.64903	0	30	0	0
Ape	Chimpanzee	Robert	male	11825	Towards	same	TS	1	1	3	9	0.339619	30	0	0	0
Ape	Chimpanzee	Robert	male	11825	Towards	same	TS	1	1	4	16	1.86726	30	0	0	0
Ape	Chimpanzee	Sandra	female	5422	Away	different	AD	0	0	1	2	-1.18802	0	30	0	0
Ape	Chimpanzee	Sandra	female	5422	Away	different	AD	0	0	2	8	0.121385	11.52	6.32	0.8	11.36
Ape	Chimpanzee	Sandra	female	5422	Away	same	AS	0	1	1	4	-0.751553	20.44	9.56	0	0
Ape	Chimpanzee	Sandra	female	5422	Away	same	AS	0	1	2	7	-0.0968496	12.36	15.08	2.56	0
Ape	Chimpanzee	Sandra	female	5422	Towards	different	TD	1	0	1	3	-0.969787	15.44	14.56	0	0
Ape	Chimpanzee	Sandra	female	5422	Towards	different	TD	1	0	2	6	-0.315084	6.88	21.24	1.88	0
Ape	Chimpanzee	Sandra	female	5422	Towards	same	TS	1	1	1	1	-1.40626	22	8	0	0
Ape	Chimpanzee	Sandra	female	5422	Towards	same	TS	1	1	2	9	0.339619	26.16	3.84	0	0
Ape	Chimpanzee	Sandra	female	5425	Away	different	AD	0	0	3	12	0.994322	0	30	0	0
Ape	Chimpanzee	Sandra	female	5425	Away	different	AD	0	0	4	16	1.86726	0	30	0	0
Ape	Chimpanzee	Sandra	female	5425	Away	same	AS	0	1	3	11	0.776088	30	0	0	0
Ape	Chimpanzee	Sandra	female	5425	Away	same	AS	0	1	4	14	1.43079	27.4	0	2.6	0
Ape	Chimpanzee	Sandra	female	5425	Towards	different	TD	1	0	3	10	0.557853	0	25.72	4.28	0
Ape	Chimpanzee	Sandra	female	5425	Towards	different	TD	1	0	4	17	2.08549	9.8	17.16	3.04	0
Ape	Chimpanzee	Sandra	female	5425	Towards	same	TS	1	1	3	13	1.21256	30	0	0	0
Ape	Chimpanzee	Sandra	female	5425	Towards	same	TS	1	1	4	15	1.64903	30	0	0	0
Ape	Chimpanzee	Tai	female	1951	Away	different	AD	0	0	1	1	-1.40626	9.36	15.52	5.12	0
Ape	Chimpanzee	Tai	female	1951	Away	different	AD	0	0	2	8	0.121385	15.08	14.92	0	0
Ape	Chimpanzee	Tai	female	1951	Away	same	AS	0	1	1	4	-0.751553	19.6	7.68	2.72	0
Ape	Chimpanzee	Tai	female	1951	Away	same	AS	0	1	2	6	-0.315084	30	0	0	0
Ape	Chimpanzee	Tai	female	1951	Towards	different	TD	1	0	1	3	-0.969787	7.76	9.36	12.88	0
Ape	Chimpanzee	Tai	female	1951	Towards	different	TD	1	0	2	7	-0.0968496	6.68	23.32	0	0
Ape	Chimpanzee	Tai	female	1951	Towards	same	TS	1	1	1	2	-1.18802	24.6	5.4	0	0
Ape	Chimpanzee	Tai	female	1951	Towards	same	TS	1	1	2	5	-0.533318	28.96	1.04	0	0
Ape	Chimpanzee	Tai	female	1969	Away	different	AD	0	0	3	12	0.994322	15.88	5.48	8.64	0
Ape	Chimpanzee	Tai	female	1969	Away	different	AD	0	0	4	15	1.64903	25.48	0	4.52	0
Ape	Chimpanzee	Tai	female	1969	Away	same	AS	0	1	3	11	0.776088	25.36	4.64	0	0
Ape	Chimpanzee	Tai	female	1969	Away	same	AS	0	1	4	13	1.21256	30	0	0	0
Ape	Chimpanzee	Tai	female	1969	Towards	different	TD	1	0	3	9	0.339619	0	17.32	12.68	0
Ape	Chimpanzee	Tai	female	1969	Towards	different	TD	1	0	4	16	1.86726	8.36	19.72	1.92	0
Ape	Chimpanzee	Tai	female	1969	Towards	same	TS	1	1	3	10	0.557853	20.16	0	9.84	0
Ape	Chimpanzee	Tai	female	1969	Towards	same	TS	1	1	4	14	1.43079	28.4	1.6	0	0
Ape	Chimpanzee	Trudi	female	5424	Away	different	AD	0	0	1	3	-0.969787	0	29.16	0.84	0
Ape	Chimpanzee	Trudi	female	5424	Away	different	AD	0	0	2	7	-0.0968496	0	30	0	0
Ape	Chimpanzee	Trudi	female	5424	Away	same	AS	0	1	1	1	-1.40626	30	0	0	0
Ape	Chimpanzee	Trudi	female	5424	Away	same	AS	0	1	2	5	-0.533318	30	0	0	0
Ape	Chimpanzee	Trudi	female	5424	Towards	different	TD	1	0	1	2	-1.18802	15.08	14.92	0	0
Ape	Chimpanzee	Trudi	female	5424	Towards	different	TD	1	0	2	8	0.121385	23.4	6.6	0	0
Ape	Chimpanzee	Trudi	female	5424	Towards	same	TS	1	1	1	4	-0.751553	30	0	0	0
Ape	Chimpanzee	Trudi	female	5424	Towards	same	TS	1	1	2	6	-0.315084	30	0	0	0
Ape	Chimpanzee	Trudi	female	5428	Away	different	AD	0	0	3	9	0.339619	0	30	0	0
Ape	Chimpanzee	Trudi	female	5428	Away	different	AD	0	0	4	13	1.21256	19.8	4.4	5.8	0
Ape	Chimpanzee	Trudi	female	5428	Away	same	AS	0	1	3	12	0.994322	30	0	0	0
Ape	Chimpanzee	Trudi	female	5428	Away	same	AS	0	1	4	15	1.64903	0	0	30	0
Ape	Chimpanzee	Trudi	female	5428	Towards	different	TD	1	0	3	11	0.776088	8.12	11.76	10.12	0
Ape	Chimpanzee	Trudi	female	5428	Towards	different	TD	1	0	4	16	1.86726	27.56	0	2.44	0
Ape	Chimpanzee	Trudi	female	5428	Towards	same	TS	1	1	3	10	0.557853	30	0	0	0
Ape	Chimpanzee	Trudi	female	5428	Towards	same	TS	1	1	4	14	1.43079	30	0	0	0
Ape	Chimpanzee	Ulla	female	11269	Away	different	AD	0	0	1	1	-1.40626	0	30	0	0
Ape	Chimpanzee	Ulla	female	11269	Away	different	AD	0	0	2	5	-0.533318	0	30	0	0
Ape	Chimpanzee	Ulla	female	11269	Away	same	AS	0	1	1	4	-0.751553	30	0	0	0
Ape	Chimpanzee	Ulla	female	11269	Away	same	AS	0	1	2	8	0.121385	30	0	0	0
Ape	Chimpanzee	Ulla	female	11269	Towards	different	TD	1	0	1	3	-0.969787	30	0	0	0
Ape	Chimpanzee	Ulla	female	11269	Towards	different	TD	1	0	2	7	-0.0968496	0	30	0	0
Ape	Chimpanzee	Ulla	female	11269	Towards	same	TS	1	1	1	2	-1.18802	29.16	0	0.84	0
Ape	Chimpanzee	Ulla	female	11269	Towards	same	TS	1	1	2	6	-0.315084	30	0	0	0
Ape	Chimpanzee	Ulla	female	11270	Away	different	AD	0	0	3	9	0.339619	21.84	5.92	2.24	0
Ape	Chimpanzee	Ulla	female	11270	Away	different	AD	0	0	4	13	1.21256	15.56	11.84	2.6	0
Ape	Chimpanzee	Ulla	female	11270	Away	same	AS	0	1	3	12	0.994322	30	0	0	0
Ape	Chimpanzee	Ulla	female	11270	Away	same	AS	0	1	4	15	1.64903	18.48	11.52	0	0
Ape	Chimpanzee	Ulla	female	11270	Towards	different	TD	1	0	3	11	0.776088	12.2	0	0	17.8
Ape	Chimpanzee	Ulla	female	11270	Towards	different	TD	1	0	4	14	1.43079	30	0	0	0
Ape	Chimpanzee	Ulla	female	11270	Towards	same	TS	1	1	3	10	0.557853	0	30	0	0
Ape	Chimpanzee	Ulla	female	11270	Towards	same	TS	1	1	4	16	1.86726	8.84	21.16	0	0
Ape	Chimpanzee	Yahaga	female	5558	Away	different	AD	0	0	1	4	-0.751553	0.44	29.56	0	0
Ape	Chimpanzee	Yahaga	female	5558	Away	different	AD	0	0	2	7	-0.0968496	1.6	20.04	2.4	5.96
Ape	Chimpanzee	Yahaga	female	5558	Away	same	AS	0	1	1	2	-1.18802	25.2	0	4.8	0
Ape	Chimpanzee	Yahaga	female	5558	Away	same	AS	0	1	2	8	0.121385	14.28	9.16	6.56	0
Ape	Chimpanzee	Yahaga	female	5558	Towards	different	TD	1	0	1	3	-0.969787	25	5	0	0
Ape	Chimpanzee	Yahaga	female	5558	Towards	different	TD	1	0	2	5	-0.533318	4.92	25.08	0	0
Ape	Chimpanzee	Yahaga	female	5558	Towards	same	TS	1	1	1	1	-1.40626	19.84	0	10.16	0
Ape	Chimpanzee	Yahaga	female	5558	Towards	same	TS	1	1	2	6	-0.315084	30	0	0	0
Ape	Chimpanzee	Yahaga	female	5562	Away	different	AD	0	0	3	10	0.557853	0	21.08	0	8.92
Ape	Chimpanzee	Yahaga	female	5562	Away	different	AD	0	0	4	15	1.64903	0	29.48	0.52	0
Ape	Chimpanzee	Yahaga	female	5562	Away	same	AS	0	1	3	11	0.776088	30	0	0	0
Ape	Chimpanzee	Yahaga	female	5562	Away	same	AS	0	1	4	13	1.21256	24.76	5.24	0	0
Ape	Chimpanzee	Yahaga	female	5562	Towards	different	TD	1	0	3	9	0.339619	10.72	13.96	5.32	0
Ape	Chimpanzee	Yahaga	female	5562	Towards	different	TD	1	0	4	16	1.86726	12.16	17.84	0	0
Ape	Chimpanzee	Yahaga	female	5562	Towards	same	TS	1	1	3	12	0.994322	28.52	0	1.48	0
Ape	Chimpanzee	Yahaga	female	5562	Towards	same	TS	1	1	4	14	1.43079	30	0	0	0
Ape	Gorilla	Bebe	female	10594	Away	different	AD	0	0	1	4	-0.751553	0	29.16	0.84	0
Ape	Gorilla	Bebe	female	10594	Away	different	AD	0	0	2	6	-0.315084	0	30	0	0
Ape	Gorilla	Bebe	female	10594	Away	same	AS	0	1	1	3	-0.969787	11.84	18.16	0	0
Ape	Gorilla	Bebe	female	10594	Away	same	AS	0	1	2	8	0.121385	0	0	30	0
Ape	Gorilla	Bebe	female	10594	Towards	different	TD	1	0	1	2	-1.18802	0	0	30	0
Ape	Gorilla	Bebe	female	10594	Towards	different	TD	1	0	2	5	-0.533318	0	8.84	21.16	0
Ape	Gorilla	Bebe	female	10594	Towards	same	TS	1	1	1	1	-1.40626	30	0	0	0
Ape	Gorilla	Bebe	female	10594	Towards	same	TS	1	1	2	7	-0.0968496	0	0	30	0
Ape	Gorilla	Bebe	female	10595	Away	different	AD	0	0	3	11	0.776088	0	30	0	0
Ape	Gorilla	Bebe	female	10595	Away	different	AD	0	0	4	13	1.21256	0	0	30	0
Ape	Gorilla	Bebe	female	10595	Away	same	AS	0	1	3	12	0.994322	30	0	0	0
Ape	Gorilla	Bebe	female	10595	Away	same	AS	0	1	4	16	1.86726	30	0	0	0
Ape	Gorilla	Bebe	female	10595	Towards	different	TD	1	0	3	9	0.339619	0	30	0	0
Ape	Gorilla	Bebe	female	10595	Towards	different	TD	1	0	4	14	1.43079	0	30	0	0
Ape	Gorilla	Bebe	female	10595	Towards	same	TS	1	1	3	10	0.557853	0	0	30	0
Ape	Gorilla	Bebe	female	10595	Towards	same	TS	1	1	4	15	1.64903	30	0	0	0
Ape	Gorilla	Kibara	female	1602	Away	different	AD	0	0	1	4	-0.751553	16.88	13.12	0	0
Ape	Gorilla	Kibara	female	1602	Away	different	AD	0	0	2	8	0.121385	0	30	0	0
Ape	Gorilla	Kibara	female	1602	Away	same	AS	0	1	1	1	-1.40626	30	0	0	0
Ape	Gorilla	Kibara	female	1602	Away	same	AS	0	1	2	5	-0.533318	0	13.84	16.16	0
Ape	Gorilla	Kibara	female	1602	Towards	different	TD	1	0	1	3	-0.969787	14.68	0	15.32	0
Ape	Gorilla	Kibara	female	1602	Towards	different	TD	1	0	2	7	-0.0968496	1.64	1.76	26.6	0
Ape	Gorilla	Kibara	female	1602	Towards	same	TS	1	1	1	2	-1.18802	16.08	0	13.92	0
Ape	Gorilla	Kibara	female	1602	Towards	same	TS	1	1	2	6	-0.315084	15.76	0	14.24	0
Ape	Gorilla	Kibara	female	1603	Away	different	AD	0	0	3	12	0.994322	0	27.52	2.48	0
Ape	Gorilla	Kibara	female	1603	Away	different	AD	0	0	4	14	1.43079	0	21.44	8.56	0
Ape	Gorilla	Kibara	female	1603	Away	same	AS	0	1	3	10	0.557853	3.24	16.92	9.84	0
Ape	Gorilla	Kibara	female	1603	Away	same	AS	0	1	4	16	1.86726	21.44	0.72	7.84	0
Ape	Gorilla	Kibara	female	1603	Towards	different	TD	1	0	3	9	0.339619	0	7.4	22.6	0
Ape	Gorilla	Kibara	female	1603	Towards	different	TD	1	0	4	15	1.64903	0	27.16	2.84	0
Ape	Gorilla	Kibara	female	1603	Towards	same	TS	1	1	3	11	0.776088	30	0	0	0
Ape	Gorilla	Kibara	female	1603	Towards	same	TS	1	1	4	13	1.21256	16.32	0	13.68	0
Ape	Gorilla	Viringika	female	4759	Away	different	AD	0	0	1	4	-0.751553	0	30	0	0
Ape	Gorilla	Viringika	female	4759	Away	different	AD	0	0	2	6	-0.315084	30	0	0	0
Ape	Gorilla	Viringika	female	4759	Away	same	AS	0	1	1	3	-0.969787	10.68	19.32	0	0
Ape	Gorilla	Viringika	female	4759	Away	same	AS	0	1	2	5	-0.533318	30	0	0	0
Ape	Gorilla	Viringika	female	4759	Towards	different	TD	1	0	1	2	-1.18802	30	0	0	0
Ape	Gorilla	Viringika	female	4759	Towards	different	TD	1	0	2	8	0.121385	0	25.96	4.04	0
Ape	Gorilla	Viringika	female	4759	Towards	same	TS	1	1	1	1	-1.40626	0	29.2	0.8	0
Ape	Gorilla	Viringika	female	4759	Towards	same	TS	1	1	2	7	-0.0968496	30	0	0	0
Ape	Gorilla	Viringika	female	4760	Away	different	AD	0	0	3	12	0.994322	0	30	0	0
Ape	Gorilla	Viringika	female	4760	Away	different	AD	0	0	4	14	1.43079	30	0	0	0
Ape	Gorilla	Viringika	female	4760	Away	same	AS	0	1	3	11	0.776088	0	30	0	0
Ape	Gorilla	Viringika	female	4760	Away	same	AS	0	1	4	13	1.21256	30	0	0	0
Ape	Gorilla	Viringika	female	4760	Towards	different	TD	1	0	3	9	0.339619	10.88	19.12	0	0
Ape	Gorilla	Viringika	female	4760	Towards	different	TD	1	0	4	15	1.64903	2.84	27.16	0	0
Ape	Gorilla	Viringika	female	4760	Towards	same	TS	1	1	3	10	0.557853	30	0	0	0
Ape	Gorilla	Viringika	female	4760	Towards	same	TS	1	1	4	16	1.86726	5.16	24.84	0	0
Ape	Orangutan	Bimbo	male	10044	Away	different	AD	0	0	1	3	-0.969787	0	0	30	0
Ape	Orangutan	Bimbo	male	10044	Away	different	AD	0	0	2	7	-0.0968496	0	30	0	0
Ape	Orangutan	Bimbo	male	10044	Away	same	AS	0	1	1	2	-1.18802	30	0	0	0
Ape	Orangutan	Bimbo	male	10044	Away	same	AS	0	1	2	6	-0.315084	0	0	30	0
Ape	Orangutan	Bimbo	male	10044	Towards	different	TD	1	0	1	1	-1.40626	0	30	0	0
Ape	Orangutan	Bimbo	male	10044	Towards	different	TD	1	0	2	5	-0.533318	0	30	0	0
Ape	Orangutan	Bimbo	male	10044	Towards	same	TS	1	1	1	4	-0.751553	30	0	0	0
Ape	Orangutan	Bimbo	male	10044	Towards	same	TS	1	1	2	8	0.121385	30	0	0	0
Ape	Orangutan	Bimbo	male	10045	Away	different	AD	0	0	3	12	0.994322	0	12.32	17.68	0
Ape	Orangutan	Bimbo	male	10045	Away	different	AD	0	0	4	16	1.86726	0	23.6	6.4	0
Ape	Orangutan	Bimbo	male	10045	Away	same	AS	0	1	3	10	0.557853	7.96	22.04	0	0
Ape	Orangutan	Bimbo	male	10045	Away	same	AS	0	1	4	15	1.64903	30	0	0	0
Ape	Orangutan	Bimbo	male	10045	Towards	different	TD	1	0	3	9	0.339619	25.8	4.2	0	0
Ape	Orangutan	Bimbo	male	10045	Towards	different	TD	1	0	4	13	1.21256	0	30	0	0
Ape	Orangutan	Bimbo	male	10045	Towards	same	TS	1	1	3	11	0.776088	30	0	0	0
Ape	Orangutan	Bimbo	male	10045	Towards	same	TS	1	1	4	14	1.43079	30	0	0	0
Ape	Orangutan	Dokana	female	6989	Away	different	AD	0	0	1	3	-0.969787	0	30	0	0
Ape	Orangutan	Dokana	female	6989	Away	different	AD	0	0	2	7	-0.0968496	0	30	0	0
Ape	Orangutan	Dokana	female	6989	Away	same	AS	0	1	1	4	-0.751553	30	0	0	0
Ape	Orangutan	Dokana	female	6989	Away	same	AS	0	1	2	5	-0.533318	30	0	0	0
Ape	Orangutan	Dokana	female	6989	Towards	different	TD	1	0	1	1	-1.40626	0	30	0	0
Ape	Orangutan	Dokana	female	6989	Towards	different	TD	1	0	2	8	0.121385	0	30	0	0
Ape	Orangutan	Dokana	female	6989	Towards	same	TS	1	1	1	2	-1.18802	30	0	0	0
Ape	Orangutan	Dokana	female	6989	Towards	same	TS	1	1	2	6	-0.315084	30	0	0	0
Ape	Orangutan	Dokana	female	6990	Away	different	AD	0	0	3	12	0.994322	0	30	0	0
Ape	Orangutan	Dokana	female	6990	Away	different	AD	0	0	4	14	1.43079	0	30	0	0
Ape	Orangutan	Dokana	female	6990	Away	same	AS	0	1	3	11	0.776088	30	0	0	0
Ape	Orangutan	Dokana	female	6990	Away	same	AS	0	1	4	15	1.64903	30	0	0	0
Ape	Orangutan	Dokana	female	6990	Towards	different	TD	1	0	3	10	0.557853	25.16	4.84	0	0
Ape	Orangutan	Dokana	female	6990	Towards	different	TD	1	0	4	16	1.86726	0	30	0	0
Ape	Orangutan	Dokana	female	6990	Towards	same	TS	1	1	3	9	0.339619	30	0	0	0
Ape	Orangutan	Dokana	female	6990	Towards	same	TS	1	1	4	13	1.21256	30	0	0	0
Ape	Orangutan	Dunja	female	12755	Away	different	AD	0	0	1	3	-0.969787	23.2	6.8	0	0
Ape	Orangutan	Dunja	female	12755	Away	different	AD	0	0	2	5	-0.533318	0	30	0	0
Ape	Orangutan	Dunja	female	12755	Away	same	AS	0	1	1	2	-1.18802	30	0	0	0
Ape	Orangutan	Dunja	female	12755	Away	same	AS	0	1	2	8	0.121385	30	0	0	0
Ape	Orangutan	Dunja	female	12755	Towards	different	TD	1	0	1	1	-1.40626	25.96	4.04	0	0
Ape	Orangutan	Dunja	female	12755	Towards	different	TD	1	0	2	6	-0.315084	0	30	0	0
Ape	Orangutan	Dunja	female	12755	Towards	same	TS	1	1	1	4	-0.751553	30	0	0	0
Ape	Orangutan	Dunja	female	12755	Towards	same	TS	1	1	2	7	-0.0968496	30	0	0	0
Ape	Orangutan	Dunja	female	12756	Away	different	AD	0	0	3	11	0.776088	0	30	0	0
Ape	Orangutan	Dunja	female	12756	Away	different	AD	0	0	4	15	1.64903	21.96	8.04	0	0
Ape	Orangutan	Dunja	female	12756	Away	same	AS	0	1	3	10	0.557853	27.24	2.76	0	0
Ape	Orangutan	Dunja	female	12756	Away	same	AS	0	1	4	13	1.21256	30	0	0	0
Ape	Orangutan	Dunja	female	12756	Towards	different	TD	1	0	3	9	0.339619	0	30	0	0
Ape	Orangutan	Dunja	female	12756	Towards	different	TD	1	0	4	14	1.43079	25.24	2.64	2.12	0
Ape	Orangutan	Dunja	female	12756	Towards	same	TS	1	1	3	12	0.994322	30	0	0	0
Ape	Orangutan	Dunja	female	12756	Towards	same	TS	1	1	4	16	1.86726	30	0	0	0
Ape	Orangutan	Kila	female	2849	Away	different	AD	0	0	1	3	-0.969787	19.68	10.32	0	0
Ape	Orangutan	Kila	female	2849	Away	different	AD	0	0	2	6	-0.315084	30	0	0	0
Ape	Orangutan	Kila	female	2849	Away	same	AS	0	1	1	4	-0.751553	14.16	5.84	0	10
Ape	Orangutan	Kila	female	2849	Away	same	AS	0	1	2	8	0.121385	20.6	9.4	0	0
Ape	Orangutan	Kila	female	2849	Towards	different	TD	1	0	1	1	-1.40626	7.92	12.48	9.6	0
Ape	Orangutan	Kila	female	2849	Towards	different	TD	1	0	2	7	-0.0968496	15.36	1.04	0	13.6
Ape	Orangutan	Kila	female	2849	Towards	same	TS	1	1	1	2	-1.18802	2.64	8.2	13.84	5.32
Ape	Orangutan	Kila	female	2849	Towards	same	TS	1	1	2	5	-0.533318	29.32	0.68	0	0
Ape	Orangutan	Kila	female	2850	Away	different	AD	0	0	3	9	0.339619	25.32	4.68	0	0
Ape	Orangutan	Kila	female	2850	Away	different	AD	0	0	4	14	1.43079	0	30	0	0
Ape	Orangutan	Kila	female	2850	Away	same	AS	0	1	3	10	0.557853	17.16	12.84	0	0
Ape	Orangutan	Kila	female	2850	Away	same	AS	0	1	4	15	1.64903	18.72	0	0	11.28
Ape	Orangutan	Kila	female	2850	Towards	different	TD	1	0	3	11	0.776088	12.8	0	0	17.2
Ape	Orangutan	Kila	female	2850	Towards	different	TD	1	0	4	13	1.21256	5.4	24.6	0	0
Ape	Orangutan	Kila	female	2850	Towards	same	TS	1	1	3	12	0.994322	30	0	0	0
Ape	Orangutan	Kila	female	2850	Towards	same	TS	1	1	4	16	1.86726	0	14.96	0	15.04
Ape	Orangutan	Padana	female	3776	Away	different	AD	0	0	1	1	-1.40626	0	30	0	0
Ape	Orangutan	Padana	female	3776	Away	different	AD	0	0	2	7	-0.0968496	9.72	20.28	0	0
Ape	Orangutan	Padana	female	3776	Away	same	AS	0	1	1	3	-0.969787	23.84	2.48	3.68	0
Ape	Orangutan	Padana	female	3776	Away	same	AS	0	1	2	8	0.121385	30	0	0	0
Ape	Orangutan	Padana	female	3776	Towards	different	TD	1	0	1	4	-0.751553	0	30	0	0
Ape	Orangutan	Padana	female	3776	Towards	different	TD	1	0	2	5	-0.533318	13.24	16.76	0	0
Ape	Orangutan	Padana	female	3776	Towards	same	TS	1	1	1	2	-1.18802	30	0	0	0
Ape	Orangutan	Padana	female	3776	Towards	same	TS	1	1	2	6	-0.315084	30	0	0	0
Ape	Orangutan	Padana	female	3777	Away	different	AD	0	0	3	12	0.994322	16.04	13.96	0	0
Ape	Orangutan	Padana	female	3777	Away	different	AD	0	0	4	16	1.86726	0	11.84	18.16	0
Ape	Orangutan	Padana	female	3777	Away	same	AS	0	1	3	11	0.776088	24.8	0	5.2	0
Ape	Orangutan	Padana	female	3777	Away	same	AS	0	1	4	15	1.64903	30	0	0	0
Ape	Orangutan	Padana	female	3777	Towards	different	TD	1	0	3	10	0.557853	6.6	15	8.4	0
Ape	Orangutan	Padana	female	3777	Towards	different	TD	1	0	4	13	1.21256	0	22.68	7.32	0
Ape	Orangutan	Padana	female	3777	Towards	same	TS	1	1	3	9	0.339619	30	0	0	0
Ape	Orangutan	Padana	female	3777	Towards	same	TS	1	1	4	14	1.43079	30	0	0	0
Ape	Orangutan	Pini	female	7204	Away	different	AD	0	0	1	2	-1.18802	26.16	3.84	0	0
Ape	Orangutan	Pini	female	7204	Away	different	AD	0	0	2	7	-0.0968496	0	30	0	0
Ape	Orangutan	Pini	female	7204	Away	same	AS	0	1	1	4	-0.751553	30	0	0	0
Ape	Orangutan	Pini	female	7204	Away	same	AS	0	1	2	8	0.121385	30	0	0	0
Ape	Orangutan	Pini	female	7204	Towards	different	TD	1	0	1	3	-0.969787	0	0	30	0
Ape	Orangutan	Pini	female	7204	Towards	different	TD	1	0	2	6	-0.315084	26.16	3.84	0	0
Ape	Orangutan	Pini	female	7204	Towards	same	TS	1	1	1	1	-1.40626	30	0	0	0
Ape	Orangutan	Pini	female	7204	Towards	same	TS	1	1	2	5	-0.533318	20.68	9.32	0	0
Ape	Orangutan	Pini	female	7205	Away	different	AD	0	0	3	11	0.776088	25.96	4.04	0	0
Ape	Orangutan	Pini	female	7205	Away	different	AD	0	0	4	16	1.86726	0	30	0	0
Ape	Orangutan	Pini	female	7205	Away	same	AS	0	1	3	10	0.557853	30	0	0	0
Ape	Orangutan	Pini	female	7205	Away	same	AS	0	1	4	15	1.64903	30	0	0	0
Ape	Orangutan	Pini	female	7205	Towards	different	TD	1	0	3	9	0.339619	25.96	4.04	0	0
Ape	Orangutan	Pini	female	7205	Towards	different	TD	1	0	4	13	1.21256	18.4	6.36	5.24	0
Ape	Orangutan	Pini	female	7205	Towards	same	TS	1	1	3	12	0.994322	30	0	0	0
Ape	Orangutan	Pini	female	7205	Towards	same	TS	1	1	4	14	1.43079	30	0	0	0

## Sheet: Switches
group	species	subj	sex	age	exp_ori	relPos	cond	exp_ori.code	relPos.code	sess	trial	z.trial	EXP	OTH
Human	Human	222811	female	601	Away	different	AD	0	0	1	1	-1.40626	0	1
Human	Human	222811	female	601	Away	different	AD	0	0	2	8	0.121385	0	0
Human	Human	222811	female	601	Away	same	AS	0	1	1	3	-0.969787	0	0
Human	Human	222811	female	601	Away	same	AS	0	1	2	6	-0.315084	0	1
Human	Human	222811	female	601	Towards	different	TD	1	0	1	2	-1.18802	1	1
Human	Human	222811	female	601	Towards	different	TD	1	0	2	7	-0.0968496	0	0
Human	Human	222811	female	601	Towards	same	TS	1	1	1	4	-0.751553	0	1
Human	Human	222811	female	601	Towards	same	TS	1	1	2	5	-0.533318	0	0
Human	Human	222831	male	613	Away	different	AD	0	0	1	2	-1.18802	0	1
Human	Human	222831	male	613	Away	different	AD	0	0	2	7	-0.0968496	0	1
Human	Human	222831	male	613	Away	same	AS	0	1	1	4	-0.751553	0	0
Human	Human	222831	male	613	Away	same	AS	0	1	2	5	-0.533318	0	0
Human	Human	222831	male	613	Towards	different	TD	1	0	1	1	-1.40626	0	0
Human	Human	222831	male	613	Towards	same	TS	1	1	1	3	-0.969787	0	1
Human	Human	222831	male	613	Towards	same	TS	1	1	2	6	-0.315084	0	0
Human	Human	222961	female	620	Away	different	AD	0	0	1	3	-0.969787	1	1
Human	Human	222961	female	620	Away	different	AD	0	0	2	6	-0.315084	0	0
Human	Human	222961	female	620	Away	same	AS	0	1	1	2	-1.18802	0	0
Human	Human	222961	female	620	Away	same	AS	0	1	2	7	-0.0968496	1	1
Human	Human	222961	female	620	Towards	different	TD	1	0	1	1	-1.40626	2	2
Human	Human	222961	female	620	Towards	different	TD	1	0	2	8	0.121385	0	0
Human	Human	222961	female	620	Towards	same	TS	1	1	1	4	-0.751553	0	1
Human	Human	222961	female	620	Towards	same	TS	1	1	2	5	-0.533318	0	0
Human	Human	224591	male	620	Away	different	AD	0	0	1	4	-0.751553	0	0
Human	Human	224591	male	620	Away	different	AD	0	0	2	5	-0.533318	0	0
Human	Human	224591	male	620	Away	same	AS	0	1	1	2	-1.18802	0	0
Human	Human	224591	male	620	Away	same	AS	0	1	2	7	-0.0968496	0	0
Human	Human	224591	male	620	Towards	different	TD	1	0	1	1	-1.40626	1	1
Human	Human	224591	male	620	Towards	different	TD	1	0	2	8	0.121385	1	2
Human	Human	224591	male	620	Towards	same	TS	1	1	1	3	-0.969787	0	0
Human	Human	224591	male	620	Towards	same	TS	1	1	2	6	-0.315084	0	0
Human	Human	225971	male	595	Away	different	AD	0	0	1	4	-0.751553	0	0
Human	Human	225971	male	595	Away	different	AD	0	0	2	5	-0.533318	0	0
Human	Human	225971	male	595	Away	same	AS	0	1	1	1	-1.40626	0	0
Human	Human	225971	male	595	Away	same	AS	0	1	2	8	0.121385	0	0
Human	Human	225971	male	595	Towards	different	TD	1	0	1	2	-1.18802	1	0
Human	Human	225971	male	595	Towards	different	TD	1	0	2	7	-0.0968496	0	0
Human	Human	225971	male	595	Towards	same	TS	1	1	1	3	-0.969787	0	0
Human	Human	225971	male	595	Towards	same	TS	1	1	2	6	-0.315084	0	0
Human	Human	226031	female	623	Away	different	AD	0	0	1	4	-0.751553	0	0
Human	Human	226031	female	623	Away	different	AD	0	0	2	5	-0.533318	0	0
Human	Human	226031	female	623	Away	same	AS	0	1	1	2	-1.18802	0	0
Human	Human	226031	female	623	Away	same	AS	0	1	2	7	-0.0968496	0	0
Human	Human	226031	female	623	Towards	different	TD	1	0	1	3	-0.969787	0	0
Human	Human	226031	female	623	Towards	different	TD	1	0	2	6	-0.315084	0	0
Human	Human	226031	female	623	Towards	same	TS	1	1	1	1	-1.40626	0	0
Human	Human	226761	female	616	Away	different	AD	0	0	1	2	-1.18802	1	1
Human	Human	226761	female	616	Away	same	AS	0	1	1	3	-0.969787	0	1
Human	Human	226761	female	616	Towards	different	TD	1	0	1	4	-0.751553	0	0
Human	Human	226761	female	616	Towards	same	TS	1	1	1	1	-1.40626	0	0
Human	Human	226791	female	611	Away	different	AD	0	0	1	2	-1.18802	1	0
Human	Human	226791	female	611	Away	same	AS	0	1	1	3	-0.969787	0	0
Human	Human	226791	female	611	Towards	different	TD	1	0	1	1	-1.40626	0	1
Human	Human	226791	female	611	Towards	same	TS	1	1	1	4	-0.751553	1	0
Human	Human	226991	female	594	Away	different	AD	0	0	1	3	-0.969787	1	0
Human	Human	226991	female	594	Away	different	AD	0	0	2	6	-0.315084	1	0
Human	Human	226991	female	594	Away	same	AS	0	1	1	4	-0.751553	0	1
Human	Human	226991	female	594	Away	same	AS	0	1	2	5	-0.533318	0	0
Human	Human	226991	female	594	Towards	different	TD	1	0	1	2	-1.18802	0	0
Human	Human	226991	female	594	Towards	different	TD	1	0	2	7	-0.0968496	0	0
Human	Human	226991	female	594	Towards	same	TS	1	1	1	1	-1.40626	1	1
Human	Human	226991	female	594	Towards	same	TS	1	1	2	8	0.121385	0	0
Human	Human	227711	female	602	Away	different	AD	0	0	1	4	-0.751553	1	2
Human	Human	227711	female	602	Away	different	AD	0	0	2	5	-0.533318	0	0
Human	Human	227711	female	602	Away	same	AS	0	1	1	1	-1.40626	0	1
Human	Human	227711	female	602	Away	same	AS	0	1	2	8	0.121385	0	0
Human	Human	227711	female	602	Towards	different	TD	1	0	1	3	-0.969787	2	0
Human	Human	227711	female	602	Towards	different	TD	1	0	2	6	-0.315084	0	0
Human	Human	227711	female	602	Towards	same	TS	1	1	1	2	-1.18802	0	0
Human	Human	227711	female	602	Towards	same	TS	1	1	2	7	-0.0968496	0	1
Human	Human	228261	male	602	Away	different	AD	0	0	1	1	-1.40626	1	1
Human	Human	228261	male	602	Away	same	AS	0	1	1	4	-0.751553	2	1
Human	Human	228261	male	602	Away	same	AS	0	1	2	5	-0.533318	1	1
Human	Human	228261	male	602	Towards	different	TD	1	0	1	3	-0.969787	0	1
Human	Human	228261	male	602	Towards	same	TS	1	1	1	2	-1.18802	1	1
Human	Human	228341	male	593	Away	different	AD	0	0	1	3	-0.969787	0	0
Human	Human	228341	male	593	Away	different	AD	0	0	2	6	-0.315084	1	1
Human	Human	228341	male	593	Away	same	AS	0	1	1	1	-1.40626	0	0
Human	Human	228341	male	593	Away	same	AS	0	1	2	8	0.121385	0	0
Human	Human	228341	male	593	Towards	different	TD	1	0	1	2	-1.18802	0	1
Human	Human	228341	male	593	Towards	different	TD	1	0	2	7	-0.0968496	1	0
Human	Human	228341	male	593	Towards	same	TS	1	1	1	4	-0.751553	0	0
Human	Human	228341	male	593	Towards	same	TS	1	1	2	5	-0.533318	0	0
Human	Human	228351	male	602	Away	different	AD	0	0	1	2	-1.18802	2	1
Human	Human	228351	male	602	Away	different	AD	0	0	2	7	-0.0968496	1	1
Human	Human	228351	male	602	Away	same	AS	0	1	1	4	-0.751553	0	0
Human	Human	228351	male	602	Away	same	AS	0	1	2	5	-0.533318	0	1
Human	Human	228351	male	602	Towards	different	TD	1	0	1	3	-0.969787	1	1
Human	Human	228351	male	602	Towards	different	TD	1	0	2	6	-0.315084	0	1
Human	Human	228351	male	602	Towards	same	TS	1	1	1	1	-1.40626	0	1
Human	Human	228351	male	602	Towards	same	TS	1	1	2	8	0.121385	1	1
Human	Human	228501	male	601	Away	different	AD	0	0	1	1	-1.40626	1	0
Human	Human	228501	male	601	Away	same	AS	0	1	1	2	-1.18802	0	0
Human	Human	228501	male	601	Away	same	AS	0	1	2	7	-0.0968496	0	1
Human	Human	228501	male	601	Towards	different	TD	1	0	1	4	-0.751553	1	1
Human	Human	228501	male	601	Towards	different	TD	1	0	2	6	-0.315084	1	2
Human	Human	228501	male	601	Towards	same	TS	1	1	1	3	-0.969787	0	0
Human	Human	228501	male	601	Towards	same	TS	1	1	2	5	-0.533318	3	3
Human	Human	228571	female	608	Away	different	AD	0	0	1	3	-0.969787	0	0
Human	Human	228571	female	608	Away	different	AD	0	0	2	6	-0.315084	0	0
Human	Human	228571	female	608	Away	same	AS	0	1	1	4	-0.751553	1	1
Human	Human	228571	female	608	Away	same	AS	0	1	2	5	-0.533318	0	0
Human	Human	228571	female	608	Towards	different	TD	1	0	1	1	-1.40626	0	0
Human	Human	228571	female	608	Towards	different	TD	1	0	2	8	0.121385	0	1
Human	Human	228571	female	608	Towards	same	TS	1	1	1	2	-1.18802	0	0
Human	Human	228571	female	608	Towards	same	TS	1	1	2	7	-0.0968496	0	0
Human	Human	228831	male	602	Away	different	AD	0	0	1	3	-0.969787	0	0
Human	Human	228831	male	602	Away	same	AS	0	1	1	1	-1.40626	0	0
Human	Human	228831	male	602	Towards	different	TD	1	0	1	4	-0.751553	1	0
Human	Human	228831	male	602	Towards	different	TD	1	0	2	5	-0.533318	0	0
Human	Human	228831	male	602	Towards	same	TS	1	1	1	2	-1.18802	0	0
Human	Human	229041	male	601	Away	different	AD	0	0	1	1	-1.40626	0	0
Human	Human	229041	male	601	Away	different	AD	0	0	2	8	0.121385	0	0
Human	Human	229041	male	601	Away	same	AS	0	1	1	4	-0.751553	0	0
Human	Human	229041	male	601	Away	same	AS	0	1	2	5	-0.533318	0	1
Human	Human	229041	male	601	Towards	different	TD	1	0	1	2	-1.18802	1	1
Human	Human	229041	male	601	Towards	different	TD	1	0	2	7	-0.0968496	1	1
Human	Human	229041	male	601	Towards	same	TS	1	1	1	3	-0.969787	0	0
Human	Human	229041	male	601	Towards	same	TS	1	1	2	6	-0.315084	0	0
Human	Human	229151	female	596	Away	different	AD	0	0	1	1	-1.40626	0	0
Human	Human	229151	female	596	Away	same	AS	0	1	1	3	-0.969787	0	0
Human	Human	229151	female	596	Towards	different	TD	1	0	1	4	-0.751553	0	0
Human	Human	229151	female	596	Towards	same	TS	1	1	1	2	-1.18802	0	0
Human	Human	230481	female	606	Away	different	AD	0	0	1	4	-0.751553	0	0
Human	Human	230481	female	606	Away	different	AD	0	0	2	5	-0.533318	0	0
Human	Human	230481	female	606	Away	same	AS	0	1	1	3	-0.969787	0	0
Human	Human	230481	female	606	Away	same	AS	0	1	2	6	-0.315084	0	0
Human	Human	230481	female	606	Towards	different	TD	1	0	1	1	-1.40626	0	0
Human	Human	230481	female	606	Towards	different	TD	1	0	2	7	-0.0968496	0	0
Human	Human	230481	female	606	Towards	same	TS	1	1	1	2	-1.18802	0	1
Human	Human	230741	male	612	Away	different	AD	0	0	1	4	-0.751553	1	1
Human	Human	230741	male	612	Away	different	AD	0	0	2	5	-0.533318	0	1
Human	Human	230741	male	612	Away	same	AS	0	1	1	3	-0.969787	1	0
Human	Human	230741	male	612	Towards	different	TD	1	0	1	2	-1.18802	0	1
Human	Human	230741	male	612	Towards	same	TS	1	1	1	1	-1.40626	1	1
Human	Human	232261	male	613	Away	different	AD	0	0	1	3	-0.969787	1	0
Human	Human	232261	male	613	Away	different	AD	0	0	2	6	-0.315084	0	0
Human	Human	232261	male	613	Away	same	AS	0	1	1	2	-1.18802	0	0
Human	Human	232261	male	613	Towards	different	TD	1	0	1	4	-0.751553	0	0
Human	Human	232261	male	613	Towards	different	TD	1	0	2	5	-0.533318	0	0
Human	Human	232261	male	613	Towards	same	TS	1	1	1	1	-1.40626	0	0
Human	Human	233831	female	612	Away	different	AD	0	0	1	2	-1.18802	0	0
Human	Human	233831	female	612	Away	different	AD	0	0	2	7	-0.0968496	0	0
Human	Human	233831	female	612	Away	same	AS	0	1	1	1	-1.40626	0	0
Human	Human	233831	female	612	Away	same	AS	0	1	2	8	0.121385	0	1
Human	Human	233831	female	612	Towards	different	TD	1	0	1	4	-0.751553	0	0
Human	Human	233831	female	612	Towards	different	TD	1	0	2	5	-0.533318	0	0
Human	Human	233831	female	612	Towards	same	TS	1	1	1	3	-0.969787	0	1
Human	Human	233831	female	612	Towards	same	TS	1	1	2	6	-0.315084	0	0
Human	Human	236642	male	620	Away	different	AD	0	0	1	1	-1.40626	0	1
Human	Human	236642	male	620	Away	same	AS	0	1	1	2	-1.18802	0	0
Human	Human	236642	male	620	Away	same	AS	0	1	2	7	-0.0968496	0	0
Human	Human	236642	male	620	Towards	different	TD	1	0	1	3	-0.969787	0	1
Human	Human	236642	male	620	Towards	different	TD	1	0	2	6	-0.315084	0	1
Human	Human	236642	male	620	Towards	same	TS	1	1	1	4	-0.751553	0	1
Human	Human	236642	male	620	Towards	same	TS	1	1	2	5	-0.533318	1	1
Human	Human	236889	female	600	Away	different	AD	0	0	1	2	-1.18802	0	0
Human	Human	236889	female	600	Away	different	AD	0	0	2	7	-0.0968496	0	0
Human	Human	236889	female	600	Away	same	AS	0	1	1	1	-1.40626	0	0
Human	Human	236889	female	600	Away	same	AS	0	1	2	8	0.121385	0	0
Human	Human	236889	female	600	Towards	different	TD	1	0	1	3	-0.969787	0	0
Human	Human	236889	female	600	Towards	different	TD	1	0	2	6	-0.315084	0	0
Human	Human	236889	female	600	Towards	same	TS	1	1	1	4	-0.751553	0	0
Human	Human	236889	female	600	Towards	same	TS	1	1	2	5	-0.533318	0	0
Ape	Bonobo	Joey	male	9228	Away	different	AD	0	0	1	1	-1.40626	1	1
Ape	Bonobo	Joey	male	9228	Away	different	AD	0	0	2	6	-0.315084	0	0
Ape	Bonobo	Joey	male	9228	Away	same	AS	0	1	1	4	-0.751553	0	0
Ape	Bonobo	Joey	male	9228	Away	same	AS	0	1	2	8	0.121385	0	0
Ape	Bonobo	Joey	male	9228	Towards	different	TD	1	0	1	2	-1.18802	0	0
Ape	Bonobo	Joey	male	9228	Towards	different	TD	1	0	2	5	-0.533318	1	0
Ape	Bonobo	Joey	male	9228	Towards	same	TS	1	1	1	3	-0.969787	0	0
Ape	Bonobo	Joey	male	9228	Towards	same	TS	1	1	2	7	-0.0968496	0	0
Ape	Bonobo	Joey	male	9229	Away	different	AD	0	0	3	11	0.776088	0	0
Ape	Bonobo	Joey	male	9229	Away	different	AD	0	0	4	14	1.43079	0	0
Ape	Bonobo	Joey	male	9229	Away	same	AS	0	1	3	12	0.994322	1	0
Ape	Bonobo	Joey	male	9229	Away	same	AS	0	1	4	15	1.64903	0	0
Ape	Bonobo	Joey	male	9229	Towards	different	TD	1	0	3	10	0.557853	0	1
Ape	Bonobo	Joey	male	9229	Towards	different	TD	1	0	4	13	1.21256	0	0
Ape	Bonobo	Joey	male	9229	Towards	same	TS	1	1	3	9	0.339619	0	0
Ape	Bonobo	Joey	male	9229	Towards	same	TS	1	1	4	16	1.86726	0	0
Ape	Bonobo	Kuno	male	4131	Away	different	AD	0	0	1	4	-0.751553	0	0
Ape	Bonobo	Kuno	male	4131	Away	different	AD	0	0	2	7	-0.0968496	0	0
Ape	Bonobo	Kuno	male	4131	Away	same	AS	0	1	1	2	-1.18802	0	0
Ape	Bonobo	Kuno	male	4131	Away	same	AS	0	1	2	8	0.121385	0	0
Ape	Bonobo	Kuno	male	4131	Towards	different	TD	1	0	1	3	-0.969787	0	0
Ape	Bonobo	Kuno	male	4131	Towards	different	TD	1	0	2	5	-0.533318	0	0
Ape	Bonobo	Kuno	male	4131	Towards	same	TS	1	1	1	1	-1.40626	0	0
Ape	Bonobo	Kuno	male	4131	Towards	same	TS	1	1	2	6	-0.315084	0	1
Ape	Bonobo	Kuno	male	4132	Away	different	AD	0	0	3	11	0.776088	0	0
Ape	Bonobo	Kuno	male	4132	Away	different	AD	0	0	4	15	1.64903	0	0
Ape	Bonobo	Kuno	male	4132	Away	same	AS	0	1	3	9	0.339619	0	0
Ape	Bonobo	Kuno	male	4132	Away	same	AS	0	1	4	16	1.86726	0	0
Ape	Bonobo	Kuno	male	4132	Towards	different	TD	1	0	3	12	0.994322	0	0
Ape	Bonobo	Kuno	male	4132	Towards	different	TD	1	0	4	13	1.21256	0	0
Ape	Bonobo	Kuno	male	4132	Towards	same	TS	1	1	3	10	0.557853	0	0
Ape	Bonobo	Kuno	male	4132	Towards	same	TS	1	1	4	14	1.43079	0	0
Ape	Bonobo	Limbuko	male	4550	Away	different	AD	0	0	1	3	-0.969787	0	1
Ape	Bonobo	Limbuko	male	4550	Away	different	AD	0	0	2	6	-0.315084	0	0
Ape	Bonobo	Limbuko	male	4550	Away	same	AS	0	1	1	2	-1.18802	1	1
Ape	Bonobo	Limbuko	male	4550	Away	same	AS	0	1	2	8	0.121385	0	0
Ape	Bonobo	Limbuko	male	4550	Towards	different	TD	1	0	1	4	-0.751553	1	0
Ape	Bonobo	Limbuko	male	4550	Towards	different	TD	1	0	2	5	-0.533318	0	0
Ape	Bonobo	Limbuko	male	4550	Towards	same	TS	1	1	1	1	-1.40626	0	0
Ape	Bonobo	Limbuko	male	4550	Towards	same	TS	1	1	2	7	-0.0968496	0	0
Ape	Bonobo	Limbuko	male	4551	Away	different	AD	0	0	3	11	0.776088	0	0
Ape	Bonobo	Limbuko	male	4551	Away	different	AD	0	0	4	13	1.21256	0	0
Ape	Bonobo	Limbuko	male	4551	Away	same	AS	0	1	3	10	0.557853	0	0
Ape	Bonobo	Limbuko	male	4551	Away	same	AS	0	1	4	14	1.43079	0	0
Ape	Bonobo	Limbuko	male	4551	Towards	different	TD	1	0	3	12	0.994322	0	0
Ape	Bonobo	Limbuko	male	4551	Towards	different	TD	1	0	4	15	1.64903	0	0
Ape	Bonobo	Limbuko	male	4551	Towards	same	TS	1	1	3	9	0.339619	1	0
Ape	Bonobo	Limbuko	male	4551	Towards	same	TS	1	1	4	16	1.86726	1	1
Ape	Bonobo	Ulindi	female	5274	Away	different	AD	0	0	1	2	-1.18802	0	0
Ape	Bonobo	Ulindi	female	5274	Away	different	AD	0	0	2	8	0.121385	1	0
Ape	Bonobo	Ulindi	female	5274	Away	same	AS	0	1	1	4	-0.751553	1	0
Ape	Bonobo	Ulindi	female	5274	Away	same	AS	0	1	2	6	-0.315084	0	1
Ape	Bonobo	Ulindi	female	5274	Towards	different	TD	1	0	1	3	-0.969787	1	0
Ape	Bonobo	Ulindi	female	5274	Towards	different	TD	1	0	2	5	-0.533318	1	1
Ape	Bonobo	Ulindi	female	5274	Towards	same	TS	1	1	1	1	-1.40626	0	0
Ape	Bonobo	Ulindi	female	5274	Towards	same	TS	1	1	2	7	-0.0968496	0	0
Ape	Bonobo	Ulindi	female	5275	Away	different	AD	0	0	3	9	0.339619	1	0
Ape	Bonobo	Ulindi	female	5275	Away	different	AD	0	0	4	16	1.86726	0	0
Ape	Bonobo	Ulindi	female	5275	Away	same	AS	0	1	3	10	0.557853	0	0
Ape	Bonobo	Ulindi	female	5275	Away	same	AS	0	1	4	14	1.43079	0	1
Ape	Bonobo	Ulindi	female	5275	Towards	different	TD	1	0	3	12	0.994322	1	1
Ape	Bonobo	Ulindi	female	5275	Towards	different	TD	1	0	4	13	1.21256	1	1
Ape	Bonobo	Ulindi	female	5275	Towards	same	TS	1	1	3	11	0.776088	1	0
Ape	Bonobo	Ulindi	female	5275	Towards	same	TS	1	1	4	15	1.64903	0	0
Ape	Bonobo	Yasa	female	3857	Away	different	AD	0	0	1	4	-0.751553	0	0
Ape	Bonobo	Yasa	female	3857	Away	different	AD	0	0	2	6	-0.315084	1	1
Ape	Bonobo	Yasa	female	3857	Away	same	AS	0	1	1	1	-1.40626	0	1
Ape	Bonobo	Yasa	female	3857	Away	same	AS	0	1	2	8	0.121385	0	0
Ape	Bonobo	Yasa	female	3857	Towards	different	TD	1	0	1	3	-0.969787	1	0
Ape	Bonobo	Yasa	female	3857	Towards	different	TD	1	0	2	5	-0.533318	1	0
Ape	Bonobo	Yasa	female	3857	Towards	same	TS	1	1	1	2	-1.18802	0	0
Ape	Bonobo	Yasa	female	3857	Towards	same	TS	1	1	2	7	-0.0968496	0	0
Ape	Bonobo	Yasa	female	3858	Away	different	AD	0	0	3	9	0.339619	0	0
Ape	Bonobo	Yasa	female	3858	Away	different	AD	0	0	4	13	1.21256	1	0
Ape	Bonobo	Yasa	female	3858	Away	same	AS	0	1	3	12	0.994322	0	0
Ape	Bonobo	Yasa	female	3858	Away	same	AS	0	1	4	16	1.86726	0	0
Ape	Bonobo	Yasa	female	3858	Towards	different	TD	1	0	3	10	0.557853	1	1
Ape	Bonobo	Yasa	female	3858	Towards	different	TD	1	0	4	15	1.64903	1	1
Ape	Bonobo	Yasa	female	3858	Towards	same	TS	1	1	3	11	0.776088	0	0
Ape	Bonobo	Yasa	female	3858	Towards	same	TS	1	1	4	14	1.43079	0	0
Ape	Chimpanzee	Alex	male	2577	Away	different	AD	0	0	3	11	0.776088	1	1
Ape	Chimpanzee	Alex	male	2577	Away	different	AD	0	0	4	15	1.64903	1	2
Ape	Chimpanzee	Alex	male	2577	Away	same	AS	0	1	3	9	0.339619	1	1
Ape	Chimpanzee	Alex	male	2577	Away	same	AS	0	1	4	13	1.21256	1	1
Ape	Chimpanzee	Alex	male	2577	Towards	different	TD	1	0	3	10	0.557853	2	1
Ape	Chimpanzee	Alex	male	2577	Towards	different	TD	1	0	4	16	1.86726	3	2
Ape	Chimpanzee	Alex	male	2577	Towards	same	TS	1	1	3	12	0.994322	0	0
Ape	Chimpanzee	Alex	male	2577	Towards	same	TS	1	1	4	14	1.43079	0	0
Ape	Chimpanzee	Alex	male	3133	Away	different	AD	0	0	1	4	-0.751553	1	1
Ape	Chimpanzee	Alex	male	3133	Away	different	AD	0	0	2	8	0.121385	0	0
Ape	Chimpanzee	Alex	male	3133	Away	same	AS	0	1	1	2	-1.18802	2	0
Ape	Chimpanzee	Alex	male	3133	Away	same	AS	0	1	2	5	-0.533318	2	2
Ape	Chimpanzee	Alex	male	3133	Towards	different	TD	1	0	1	1	-1.40626	2	3
Ape	Chimpanzee	Alex	male	3133	Towards	different	TD	1	0	2	7	-0.0968496	1	1
Ape	Chimpanzee	Alex	male	3133	Towards	same	TS	1	1	1	3	-0.969787	0	0
Ape	Chimpanzee	Alex	male	3133	Towards	same	TS	1	1	2	6	-0.315084	0	0
Ape	Chimpanzee	Alexandra	female	3133	Away	different	AD	0	0	1	1	-1.40626	0	0
Ape	Chimpanzee	Alexandra	female	3133	Away	different	AD	0	0	2	8	0.121385	0	0
Ape	Chimpanzee	Alexandra	female	3133	Away	same	AS	0	1	1	3	-0.969787	1	1
Ape	Chimpanzee	Alexandra	female	3133	Away	same	AS	0	1	2	6	-0.315084	1	0
Ape	Chimpanzee	Alexandra	female	3133	Towards	different	TD	1	0	1	2	-1.18802	2	1
Ape	Chimpanzee	Alexandra	female	3133	Towards	different	TD	1	0	2	7	-0.0968496	0	0
Ape	Chimpanzee	Alexandra	female	3133	Towards	same	TS	1	1	1	4	-0.751553	0	1
Ape	Chimpanzee	Alexandra	female	3133	Towards	same	TS	1	1	2	5	-0.533318	0	0
Ape	Chimpanzee	Alexandra	female	3135	Away	different	AD	0	0	3	11	0.776088	1	1
Ape	Chimpanzee	Alexandra	female	3135	Away	different	AD	0	0	4	15	1.64903	1	1
Ape	Chimpanzee	Alexandra	female	3135	Away	same	AS	0	1	3	10	0.557853	0	0
Ape	Chimpanzee	Alexandra	female	3135	Away	same	AS	0	1	4	14	1.43079	0	0
Ape	Chimpanzee	Alexandra	female	3135	Towards	different	TD	1	0	3	12	0.994322	1	0
Ape	Chimpanzee	Alexandra	female	3135	Towards	different	TD	1	0	4	13	1.21256	1	1
Ape	Chimpanzee	Alexandra	female	3135	Towards	same	TS	1	1	3	9	0.339619	0	0
Ape	Chimpanzee	Alexandra	female	3135	Towards	same	TS	1	1	4	16	1.86726	0	0
Ape	Chimpanzee	Annett	female	3133	Away	different	AD	0	0	1	1	-1.40626	0	0
Ape	Chimpanzee	Annett	female	3133	Away	different	AD	0	0	2	7	-0.0968496	1	1
Ape	Chimpanzee	Annett	female	3133	Away	same	AS	0	1	1	3	-0.969787	0	0
Ape	Chimpanzee	Annett	female	3133	Away	same	AS	0	1	2	8	0.121385	0	1
Ape	Chimpanzee	Annett	female	3133	Towards	different	TD	1	0	1	2	-1.18802	0	0
Ape	Chimpanzee	Annett	female	3133	Towards	different	TD	1	0	2	5	-0.533318	1	1
Ape	Chimpanzee	Annett	female	3133	Towards	same	TS	1	1	1	4	-0.751553	0	0
Ape	Chimpanzee	Annett	female	3133	Towards	same	TS	1	1	2	6	-0.315084	0	0
Ape	Chimpanzee	Annett	female	3137	Away	different	AD	0	0	3	12	0.994322	1	1
Ape	Chimpanzee	Annett	female	3137	Away	different	AD	0	0	4	13	1.21256	0	0
Ape	Chimpanzee	Annett	female	3137	Away	same	AS	0	1	3	10	0.557853	0	0
Ape	Chimpanzee	Annett	female	3137	Away	same	AS	0	1	4	16	1.86726	0	0
Ape	Chimpanzee	Annett	female	3137	Towards	different	TD	1	0	3	9	0.339619	1	0
Ape	Chimpanzee	Annett	female	3137	Towards	different	TD	1	0	4	15	1.64903	1	0
Ape	Chimpanzee	Annett	female	3137	Towards	same	TS	1	1	3	11	0.776088	0	0
Ape	Chimpanzee	Annett	female	3137	Towards	same	TS	1	1	4	14	1.43079	0	0
Ape	Chimpanzee	Corrie	female	11447	Away	different	AD	0	0	1	4	-0.751553	0	0
Ape	Chimpanzee	Corrie	female	11447	Away	different	AD	0	0	2	5	-0.533318	1	1
Ape	Chimpanzee	Corrie	female	11447	Away	same	AS	0	1	1	2	-1.18802	1	1
Ape	Chimpanzee	Corrie	female	11447	Away	same	AS	0	1	2	7	-0.0968496	0	0
Ape	Chimpanzee	Corrie	female	11447	Towards	different	TD	1	0	1	3	-0.969787	1	0
Ape	Chimpanzee	Corrie	female	11447	Towards	different	TD	1	0	2	8	0.121385	3	3
Ape	Chimpanzee	Corrie	female	11447	Towards	same	TS	1	1	1	1	-1.40626	0	1
Ape	Chimpanzee	Corrie	female	11447	Towards	same	TS	1	1	2	6	-0.315084	0	0
Ape	Chimpanzee	Corrie	female	11448	Away	different	AD	0	0	3	12	0.994322	0	0
Ape	Chimpanzee	Corrie	female	11448	Away	different	AD	0	0	4	13	1.21256	2	3
Ape	Chimpanzee	Corrie	female	11448	Away	same	AS	0	1	3	11	0.776088	1	1
Ape	Chimpanzee	Corrie	female	11448	Away	same	AS	0	1	4	16	1.86726	1	2
Ape	Chimpanzee	Corrie	female	11448	Towards	different	TD	1	0	3	10	0.557853	0	0
Ape	Chimpanzee	Corrie	female	11448	Towards	different	TD	1	0	4	15	1.64903	1	2
Ape	Chimpanzee	Corrie	female	11448	Towards	same	TS	1	1	3	9	0.339619	0	0
Ape	Chimpanzee	Corrie	female	11448	Towards	same	TS	1	1	4	14	1.43079	0	0
Ape	Chimpanzee	Doreen	female	10038	Away	different	AD	0	0	1	3	-0.969787	1	0
Ape	Chimpanzee	Doreen	female	10038	Away	different	AD	0	0	2	7	-0.0968496	1	1
Ape	Chimpanzee	Doreen	female	10038	Away	same	AS	0	1	1	1	-1.40626	0	0
Ape	Chimpanzee	Doreen	female	10038	Away	same	AS	0	1	2	6	-0.315084	2	2
Ape	Chimpanzee	Doreen	female	10038	Towards	different	TD	1	0	1	4	-0.751553	1	1
Ape	Chimpanzee	Doreen	female	10038	Towards	different	TD	1	0	2	8	0.121385	2	2
Ape	Chimpanzee	Doreen	female	10038	Towards	same	TS	1	1	1	2	-1.18802	0	0
Ape	Chimpanzee	Doreen	female	10038	Towards	same	TS	1	1	2	5	-0.533318	1	2
Ape	Chimpanzee	Doreen	female	10055	Away	different	AD	0	0	3	12	0.994322	1	1
Ape	Chimpanzee	Doreen	female	10055	Away	different	AD	0	0	4	15	1.64903	2	2
Ape	Chimpanzee	Doreen	female	10055	Away	same	AS	0	1	3	11	0.776088	1	2
Ape	Chimpanzee	Doreen	female	10055	Away	same	AS	0	1	4	14	1.43079	2	2
Ape	Chimpanzee	Doreen	female	10055	Towards	different	TD	1	0	3	9	0.339619	1	1
Ape	Chimpanzee	Doreen	female	10055	Towards	different	TD	1	0	4	13	1.21256	2	1
Ape	Chimpanzee	Doreen	female	10055	Towards	same	TS	1	1	3	10	0.557853	2	2
Ape	Chimpanzee	Doreen	female	10055	Towards	same	TS	1	1	4	16	1.86726	1	2
Ape	Chimpanzee	Fraukje	female	11697	Away	different	AD	0	0	1	2	-1.18802	1	1
Ape	Chimpanzee	Fraukje	female	11697	Away	different	AD	0	0	2	7	-0.0968496	1	0
Ape	Chimpanzee	Fraukje	female	11697	Away	same	AS	0	1	1	4	-0.751553	0	1
Ape	Chimpanzee	Fraukje	female	11697	Away	same	AS	0	1	2	6	-0.315084	0	1
Ape	Chimpanzee	Fraukje	female	11697	Towards	different	TD	1	0	1	1	-1.40626	0	1
Ape	Chimpanzee	Fraukje	female	11697	Towards	different	TD	1	0	2	8	0.121385	1	1
Ape	Chimpanzee	Fraukje	female	11697	Towards	same	TS	1	1	1	3	-0.969787	0	0
Ape	Chimpanzee	Fraukje	female	11697	Towards	same	TS	1	1	2	5	-0.533318	0	0
Ape	Chimpanzee	Fraukje	female	11715	Away	different	AD	0	0	3	9	0.339619	1	1
Ape	Chimpanzee	Fraukje	female	11715	Away	different	AD	0	0	4	14	1.43079	0	0
Ape	Chimpanzee	Fraukje	female	11715	Away	same	AS	0	1	3	11	0.776088	1	1
Ape	Chimpanzee	Fraukje	female	11715	Away	same	AS	0	1	4	16	1.86726	1	1
Ape	Chimpanzee	Fraukje	female	11715	Towards	different	TD	1	0	3	12	0.994322	0	0
Ape	Chimpanzee	Fraukje	female	11715	Towards	different	TD	1	0	4	15	1.64903	1	0
Ape	Chimpanzee	Fraukje	female	11715	Towards	same	TS	1	1	3	10	0.557853	0	0
Ape	Chimpanzee	Fraukje	female	11715	Towards	same	TS	1	1	4	13	1.21256	1	2
Ape	Chimpanzee	Frodo	male	5252	Away	different	AD	0	0	1	2	-1.18802	0	0
Ape	Chimpanzee	Frodo	male	5252	Away	different	AD	0	0	2	8	0.121385	1	1
Ape	Chimpanzee	Frodo	male	5252	Away	same	AS	0	1	1	3	-0.969787	0	0
Ape	Chimpanzee	Frodo	male	5252	Away	same	AS	0	1	2	6	-0.315084	1	0
Ape	Chimpanzee	Frodo	male	5252	Towards	different	TD	1	0	1	1	-1.40626	1	0
Ape	Chimpanzee	Frodo	male	5252	Towards	different	TD	1	0	2	5	-0.533318	0	0
Ape	Chimpanzee	Frodo	male	5252	Towards	same	TS	1	1	1	4	-0.751553	0	0
Ape	Chimpanzee	Frodo	male	5252	Towards	same	TS	1	1	2	7	-0.0968496	0	0
Ape	Chimpanzee	Frodo	male	5270	Away	different	AD	0	0	3	11	0.776088	3	3
Ape	Chimpanzee	Frodo	male	5270	Away	different	AD	0	0	4	13	1.21256	0	1
Ape	Chimpanzee	Frodo	male	5270	Away	same	AS	0	1	3	12	0.994322	1	1
Ape	Chimpanzee	Frodo	male	5270	Away	same	AS	0	1	4	15	1.64903	2	2
Ape	Chimpanzee	Frodo	male	5270	Towards	different	TD	1	0	3	9	0.339619	1	1
Ape	Chimpanzee	Frodo	male	5270	Towards	different	TD	1	0	4	16	1.86726	1	1
Ape	Chimpanzee	Frodo	male	5270	Towards	same	TS	1	1	3	10	0.557853	0	0
Ape	Chimpanzee	Frodo	male	5270	Towards	same	TS	1	1	4	14	1.43079	2	1
Ape	Chimpanzee	Lome	male	2439	Away	different	AD	0	0	1	2	-1.18802	1	2
Ape	Chimpanzee	Lome	male	2439	Away	different	AD	0	0	2	8	0.121385	1	0
Ape	Chimpanzee	Lome	male	2439	Away	same	AS	0	1	1	1	-1.40626	1	1
Ape	Chimpanzee	Lome	male	2439	Away	same	AS	0	1	2	6	-0.315084	0	1
Ape	Chimpanzee	Lome	male	2439	Towards	different	TD	1	0	1	4	-0.751553	1	2
Ape	Chimpanzee	Lome	male	2439	Towards	different	TD	1	0	2	5	-0.533318	1	1
Ape	Chimpanzee	Lome	male	2439	Towards	same	TS	1	1	1	3	-0.969787	0	0
Ape	Chimpanzee	Lome	male	2439	Towards	same	TS	1	1	2	7	-0.0968496	0	0
Ape	Chimpanzee	Lome	male	2440	Away	different	AD	0	0	3	10	0.557853	2	2
Ape	Chimpanzee	Lome	male	2440	Away	different	AD	0	0	4	16	1.86726	1	2
Ape	Chimpanzee	Lome	male	2440	Away	same	AS	0	1	3	12	0.994322	0	0
Ape	Chimpanzee	Lome	male	2440	Away	same	AS	0	1	4	13	1.21256	2	2
Ape	Chimpanzee	Lome	male	2440	Towards	different	TD	1	0	3	9	0.339619	2	2
Ape	Chimpanzee	Lome	male	2440	Towards	different	TD	1	0	4	14	1.43079	1	1
Ape	Chimpanzee	Lome	male	2440	Towards	same	TS	1	1	3	11	0.776088	1	1
Ape	Chimpanzee	Lome	male	2440	Towards	same	TS	1	1	4	15	1.64903	1	2
Ape	Chimpanzee	Natascha	female	10246	Away	different	AD	0	0	1	2	-1.18802	0	0
Ape	Chimpanzee	Natascha	female	10246	Away	different	AD	0	0	2	7	-0.0968496	2	2
Ape	Chimpanzee	Natascha	female	10246	Away	same	AS	0	1	1	3	-0.969787	2	2
Ape	Chimpanzee	Natascha	female	10246	Away	same	AS	0	1	2	6	-0.315084	0	0
Ape	Chimpanzee	Natascha	female	10246	Towards	different	TD	1	0	1	1	-1.40626	2	1
Ape	Chimpanzee	Natascha	female	10246	Towards	different	TD	1	0	2	8	0.121385	0	0
Ape	Chimpanzee	Natascha	female	10246	Towards	same	TS	1	1	1	4	-0.751553	0	0
Ape	Chimpanzee	Natascha	female	10246	Towards	same	TS	1	1	2	5	-0.533318	2	2
Ape	Chimpanzee	Natascha	female	10263	Away	different	AD	0	0	3	12	0.994322	2	3
Ape	Chimpanzee	Natascha	female	10263	Away	different	AD	0	0	4	13	1.21256	0	0
Ape	Chimpanzee	Natascha	female	10263	Away	same	AS	0	1	3	10	0.557853	3	3
Ape	Chimpanzee	Natascha	female	10263	Away	same	AS	0	1	4	16	1.86726	0	0
Ape	Chimpanzee	Natascha	female	10263	Towards	different	TD	1	0	3	11	0.776088	0	0
Ape	Chimpanzee	Natascha	female	10263	Towards	different	TD	1	0	4	15	1.64903	1	2
Ape	Chimpanzee	Natascha	female	10263	Towards	same	TS	1	1	3	9	0.339619	0	0
Ape	Chimpanzee	Natascha	female	10263	Towards	same	TS	1	1	4	14	1.43079	3	0
Ape	Chimpanzee	Patrick	male	3965	Away	different	AD	0	0	1	3	-0.969787	0	0
Ape	Chimpanzee	Patrick	male	3965	Away	different	AD	0	0	2	8	0.121385	0	0
Ape	Chimpanzee	Patrick	male	3965	Away	same	AS	0	1	1	4	-0.751553	0	1
Ape	Chimpanzee	Patrick	male	3965	Away	same	AS	0	1	2	5	-0.533318	0	0
Ape	Chimpanzee	Patrick	male	3965	Towards	different	TD	1	0	1	1	-1.40626	1	0
Ape	Chimpanzee	Patrick	male	3965	Towards	different	TD	1	0	2	6	-0.315084	0	0
Ape	Chimpanzee	Patrick	male	3965	Towards	same	TS	1	1	1	2	-1.18802	0	0
Ape	Chimpanzee	Patrick	male	3965	Towards	same	TS	1	1	2	7	-0.0968496	0	0
Ape	Chimpanzee	Patrick	male	4009	Away	different	AD	0	0	3	11	0.776088	1	1
Ape	Chimpanzee	Patrick	male	4009	Away	different	AD	0	0	4	15	1.64903	2	2
Ape	Chimpanzee	Patrick	male	4009	Away	same	AS	0	1	3	12	0.994322	1	1
Ape	Chimpanzee	Patrick	male	4009	Away	same	AS	0	1	4	14	1.43079	0	0
Ape	Chimpanzee	Patrick	male	4009	Towards	different	TD	1	0	3	10	0.557853	1	1
Ape	Chimpanzee	Patrick	male	4009	Towards	different	TD	1	0	4	13	1.21256	1	1
Ape	Chimpanzee	Patrick	male	4009	Towards	same	TS	1	1	3	9	0.339619	1	1
Ape	Chimpanzee	Patrick	male	4009	Towards	same	TS	1	1	4	16	1.86726	0	1
Ape	Chimpanzee	Pia	female	3132	Away	different	AD	0	0	1	4	-0.751553	0	0
Ape	Chimpanzee	Pia	female	3132	Away	different	AD	0	0	2	5	-0.533318	0	1
Ape	Chimpanzee	Pia	female	3132	Away	same	AS	0	1	1	1	-1.40626	1	1
Ape	Chimpanzee	Pia	female	3132	Away	same	AS	0	1	2	8	0.121385	0	1
Ape	Chimpanzee	Pia	female	3132	Towards	different	TD	1	0	1	2	-1.18802	0	1
Ape	Chimpanzee	Pia	female	3132	Towards	different	TD	1	0	2	7	-0.0968496	2	1
Ape	Chimpanzee	Pia	female	3132	Towards	same	TS	1	1	1	3	-0.969787	0	0
Ape	Chimpanzee	Pia	female	3132	Towards	same	TS	1	1	2	6	-0.315084	0	0
Ape	Chimpanzee	Pia	female	3152	Away	different	AD	0	0	3	12	0.994322	2	2
Ape	Chimpanzee	Pia	female	3152	Away	different	AD	0	0	4	14	1.43079	1	1
Ape	Chimpanzee	Pia	female	3152	Away	same	AS	0	1	3	9	0.339619	1	0
Ape	Chimpanzee	Pia	female	3152	Away	same	AS	0	1	4	13	1.21256	0	1
Ape	Chimpanzee	Pia	female	3152	Towards	different	TD	1	0	3	11	0.776088	1	1
Ape	Chimpanzee	Pia	female	3152	Towards	different	TD	1	0	4	16	1.86726	3	2
Ape	Chimpanzee	Pia	female	3152	Towards	same	TS	1	1	3	10	0.557853	1	1
Ape	Chimpanzee	Pia	female	3152	Towards	same	TS	1	1	4	15	1.64903	0	0
Ape	Chimpanzee	Riet	female	11114	Away	different	AD	0	0	1	4	-0.751553	1	0
Ape	Chimpanzee	Riet	female	11114	Away	different	AD	0	0	2	5	-0.533318	1	0
Ape	Chimpanzee	Riet	female	11114	Away	same	AS	0	1	1	3	-0.969787	1	1
Ape	Chimpanzee	Riet	female	11114	Away	same	AS	0	1	2	8	0.121385	0	0
Ape	Chimpanzee	Riet	female	11114	Towards	different	TD	1	0	1	2	-1.18802	1	0
Ape	Chimpanzee	Riet	female	11114	Towards	different	TD	1	0	2	6	-0.315084	1	0
Ape	Chimpanzee	Riet	female	11114	Towards	same	TS	1	1	1	1	-1.40626	0	1
Ape	Chimpanzee	Riet	female	11114	Towards	same	TS	1	1	2	7	-0.0968496	0	0
Ape	Chimpanzee	Riet	female	11131	Away	different	AD	0	0	3	9	0.339619	1	0
Ape	Chimpanzee	Riet	female	11131	Away	different	AD	0	0	4	16	1.86726	0	0
Ape	Chimpanzee	Riet	female	11131	Away	same	AS	0	1	3	10	0.557853	0	0
Ape	Chimpanzee	Riet	female	11131	Away	same	AS	0	1	4	15	1.64903	0	0
Ape	Chimpanzee	Riet	female	11131	Towards	different	TD	1	0	3	11	0.776088	0	0
Ape	Chimpanzee	Riet	female	11131	Towards	different	TD	1	0	4	14	1.43079	1	0
Ape	Chimpanzee	Riet	female	11131	Towards	same	TS	1	1	3	12	0.994322	0	1
Ape	Chimpanzee	Riet	female	11131	Towards	same	TS	1	1	4	13	1.21256	0	0
Ape	Chimpanzee	Robert	male	11824	Away	different	AD	0	0	1	3	-0.969787	0	0
Ape	Chimpanzee	Robert	male	11824	Away	different	AD	0	0	2	7	-0.0968496	0	0
Ape	Chimpanzee	Robert	male	11824	Away	same	AS	0	1	1	1	-1.40626	0	0
Ape	Chimpanzee	Robert	male	11824	Away	same	AS	0	1	2	5	-0.533318	0	0
Ape	Chimpanzee	Robert	male	11824	Towards	different	TD	1	0	1	2	-1.18802	0	0
Ape	Chimpanzee	Robert	male	11824	Towards	different	TD	1	0	2	8	0.121385	0	0
Ape	Chimpanzee	Robert	male	11824	Towards	same	TS	1	1	1	4	-0.751553	0	0
Ape	Chimpanzee	Robert	male	11824	Towards	same	TS	1	1	2	6	-0.315084	0	0
Ape	Chimpanzee	Robert	male	11825	Away	different	AD	0	0	3	10	0.557853	0	0
Ape	Chimpanzee	Robert	male	11825	Away	different	AD	0	0	4	13	1.21256	0	0
Ape	Chimpanzee	Robert	male	11825	Away	same	AS	0	1	3	12	0.994322	0	0
Ape	Chimpanzee	Robert	male	11825	Away	same	AS	0	1	4	14	1.43079	0	0
Ape	Chimpanzee	Robert	male	11825	Towards	different	TD	1	0	3	11	0.776088	0	0
Ape	Chimpanzee	Robert	male	11825	Towards	different	TD	1	0	4	15	1.64903	0	0
Ape	Chimpanzee	Robert	male	11825	Towards	same	TS	1	1	3	9	0.339619	0	0
Ape	Chimpanzee	Robert	male	11825	Towards	same	TS	1	1	4	16	1.86726	0	0
Ape	Chimpanzee	Sandra	female	5422	Away	different	AD	0	0	1	2	-1.18802	0	0
Ape	Chimpanzee	Sandra	female	5422	Away	different	AD	0	0	2	8	0.121385	1	1
Ape	Chimpanzee	Sandra	female	5422	Away	same	AS	0	1	1	4	-0.751553	1	2
Ape	Chimpanzee	Sandra	female	5422	Away	same	AS	0	1	2	7	-0.0968496	2	1
Ape	Chimpanzee	Sandra	female	5422	Towards	different	TD	1	0	1	3	-0.969787	2	1
Ape	Chimpanzee	Sandra	female	5422	Towards	different	TD	1	0	2	6	-0.315084	2	2
Ape	Chimpanzee	Sandra	female	5422	Towards	same	TS	1	1	1	1	-1.40626	1	1
Ape	Chimpanzee	Sandra	female	5422	Towards	same	TS	1	1	2	9	0.339619	1	1
Ape	Chimpanzee	Sandra	female	5425	Away	different	AD	0	0	3	12	0.994322	0	0
Ape	Chimpanzee	Sandra	female	5425	Away	different	AD	0	0	4	16	1.86726	0	0
Ape	Chimpanzee	Sandra	female	5425	Away	same	AS	0	1	3	11	0.776088	0	0
Ape	Chimpanzee	Sandra	female	5425	Away	same	AS	0	1	4	14	1.43079	0	0
Ape	Chimpanzee	Sandra	female	5425	Towards	different	TD	1	0	3	10	0.557853	0	0
Ape	Chimpanzee	Sandra	female	5425	Towards	different	TD	1	0	4	17	2.08549	1	0
Ape	Chimpanzee	Sandra	female	5425	Towards	same	TS	1	1	3	13	1.21256	0	0
Ape	Chimpanzee	Sandra	female	5425	Towards	same	TS	1	1	4	15	1.64903	0	0
Ape	Chimpanzee	Tai	female	1951	Away	different	AD	0	0	1	1	-1.40626	1	1
Ape	Chimpanzee	Tai	female	1951	Away	different	AD	0	0	2	8	0.121385	1	1
Ape	Chimpanzee	Tai	female	1951	Away	same	AS	0	1	1	4	-0.751553	1	2
Ape	Chimpanzee	Tai	female	1951	Away	same	AS	0	1	2	6	-0.315084	0	0
Ape	Chimpanzee	Tai	female	1951	Towards	different	TD	1	0	1	3	-0.969787	1	2
Ape	Chimpanzee	Tai	female	1951	Towards	different	TD	1	0	2	7	-0.0968496	1	1
Ape	Chimpanzee	Tai	female	1951	Towards	same	TS	1	1	1	2	-1.18802	1	2
Ape	Chimpanzee	Tai	female	1951	Towards	same	TS	1	1	2	5	-0.533318	1	0
Ape	Chimpanzee	Tai	female	1969	Away	different	AD	0	0	3	12	0.994322	0	1
Ape	Chimpanzee	Tai	female	1969	Away	different	AD	0	0	4	15	1.64903	0	0
Ape	Chimpanzee	Tai	female	1969	Away	same	AS	0	1	3	11	0.776088	1	1
Ape	Chimpanzee	Tai	female	1969	Away	same	AS	0	1	4	13	1.21256	0	0
Ape	Chimpanzee	Tai	female	1969	Towards	different	TD	1	0	3	9	0.339619	0	0
Ape	Chimpanzee	Tai	female	1969	Towards	different	TD	1	0	4	16	1.86726	0	1
Ape	Chimpanzee	Tai	female	1969	Towards	same	TS	1	1	3	10	0.557853	0	0
Ape	Chimpanzee	Tai	female	1969	Towards	same	TS	1	1	4	14	1.43079	1	0
Ape	Chimpanzee	Trudi	female	5424	Away	different	AD	0	0	1	3	-0.969787	0	0
Ape	Chimpanzee	Trudi	female	5424	Away	different	AD	0	0	2	7	-0.0968496	0	0
Ape	Chimpanzee	Trudi	female	5424	Away	same	AS	0	1	1	1	-1.40626	0	0
Ape	Chimpanzee	Trudi	female	5424	Away	same	AS	0	1	2	5	-0.533318	0	0
Ape	Chimpanzee	Trudi	female	5424	Towards	different	TD	1	0	1	2	-1.18802	1	1
Ape	Chimpanzee	Trudi	female	5424	Towards	different	TD	1	0	2	8	0.121385	1	0
Ape	Chimpanzee	Trudi	female	5424	Towards	same	TS	1	1	1	4	-0.751553	0	0
Ape	Chimpanzee	Trudi	female	5424	Towards	same	TS	1	1	2	6	-0.315084	0	0
Ape	Chimpanzee	Trudi	female	5428	Away	different	AD	0	0	3	9	0.339619	0	0
Ape	Chimpanzee	Trudi	female	5428	Away	different	AD	0	0	4	13	1.21256	1	0
Ape	Chimpanzee	Trudi	female	5428	Away	same	AS	0	1	3	12	0.994322	0	0
Ape	Chimpanzee	Trudi	female	5428	Away	same	AS	0	1	4	15	1.64903	0	0
Ape	Chimpanzee	Trudi	female	5428	Towards	different	TD	1	0	3	11	0.776088	1	1
Ape	Chimpanzee	Trudi	female	5428	Towards	different	TD	1	0	4	16	1.86726	1	0
Ape	Chimpanzee	Trudi	female	5428	Towards	same	TS	1	1	3	10	0.557853	0	0
Ape	Chimpanzee	Trudi	female	5428	Towards	same	TS	1	1	4	14	1.43079	0	0
Ape	Chimpanzee	Ulla	female	11269	Away	different	AD	0	0	1	1	-1.40626	0	0
Ape	Chimpanzee	Ulla	female	11269	Away	different	AD	0	0	2	5	-0.533318	0	0
Ape	Chimpanzee	Ulla	female	11269	Away	same	AS	0	1	1	4	-0.751553	0	0
Ape	Chimpanzee	Ulla	female	11269	Away	same	AS	0	1	2	8	0.121385	0	0
Ape	Chimpanzee	Ulla	female	11269	Towards	different	TD	1	0	1	3	-0.969787	0	0
Ape	Chimpanzee	Ulla	female	11269	Towards	different	TD	1	0	2	7	-0.0968496	0	0
Ape	Chimpanzee	Ulla	female	11269	Towards	same	TS	1	1	1	2	-1.18802	1	0
Ape	Chimpanzee	Ulla	female	11269	Towards	same	TS	1	1	2	6	-0.315084	0	0
Ape	Chimpanzee	Ulla	female	11270	Away	different	AD	0	0	3	9	0.339619	1	1
Ape	Chimpanzee	Ulla	female	11270	Away	different	AD	0	0	4	13	1.21256	1	1
Ape	Chimpanzee	Ulla	female	11270	Away	same	AS	0	1	3	12	0.994322	0	0
Ape	Chimpanzee	Ulla	female	11270	Away	same	AS	0	1	4	15	1.64903	1	1
Ape	Chimpanzee	Ulla	female	11270	Towards	different	TD	1	0	3	11	0.776088	0	0
Ape	Chimpanzee	Ulla	female	11270	Towards	different	TD	1	0	4	14	1.43079	0	0
Ape	Chimpanzee	Ulla	female	11270	Towards	same	TS	1	1	3	10	0.557853	0	0
Ape	Chimpanzee	Ulla	female	11270	Towards	same	TS	1	1	4	16	1.86726	0	1
Ape	Chimpanzee	Yahaga	female	5558	Away	different	AD	0	0	1	4	-0.751553	1	0
Ape	Chimpanzee	Yahaga	female	5558	Away	different	AD	0	0	2	7	-0.0968496	1	0
Ape	Chimpanzee	Yahaga	female	5558	Away	same	AS	0	1	1	2	-1.18802	0	0
Ape	Chimpanzee	Yahaga	female	5558	Away	same	AS	0	1	2	8	0.121385	0	1
Ape	Chimpanzee	Yahaga	female	5558	Towards	different	TD	1	0	1	3	-0.969787	1	0
Ape	Chimpanzee	Yahaga	female	5558	Towards	different	TD	1	0	2	5	-0.533318	1	1
Ape	Chimpanzee	Yahaga	female	5558	Towards	same	TS	1	1	1	1	-1.40626	0	0
Ape	Chimpanzee	Yahaga	female	5558	Towards	same	TS	1	1	2	6	-0.315084	0	0
Ape	Chimpanzee	Yahaga	female	5562	Away	different	AD	0	0	3	10	0.557853	0	0
Ape	Chimpanzee	Yahaga	female	5562	Away	different	AD	0	0	4	15	1.64903	0	0
Ape	Chimpanzee	Yahaga	female	5562	Away	same	AS	0	1	3	11	0.776088	0	0
Ape	Chimpanzee	Yahaga	female	5562	Away	same	AS	0	1	4	13	1.21256	0	1
Ape	Chimpanzee	Yahaga	female	5562	Towards	different	TD	1	0	3	9	0.339619	1	0
Ape	Chimpanzee	Yahaga	female	5562	Towards	different	TD	1	0	4	16	1.86726	1	2
Ape	Chimpanzee	Yahaga	female	5562	Towards	same	TS	1	1	3	12	0.994322	0	0
Ape	Chimpanzee	Yahaga	female	5562	Towards	same	TS	1	1	4	14	1.43079	0	0
Ape	Gorilla	Bebe	female	10594	Away	different	AD	0	0	1	4	-0.751553	0	0
Ape	Gorilla	Bebe	female	10594	Away	different	AD	0	0	2	6	-0.315084	0	0
Ape	Gorilla	Bebe	female	10594	Away	same	AS	0	1	1	3	-0.969787	1	0
Ape	Gorilla	Bebe	female	10594	Away	same	AS	0	1	2	8	0.121385	0	0
Ape	Gorilla	Bebe	female	10594	Towards	different	TD	1	0	1	2	-1.18802	0	0
Ape	Gorilla	Bebe	female	10594	Towards	different	TD	1	0	2	5	-0.533318	0	1
Ape	Gorilla	Bebe	female	10594	Towards	same	TS	1	1	1	1	-1.40626	0	0
Ape	Gorilla	Bebe	female	10594	Towards	same	TS	1	1	2	7	-0.0968496	0	0
Ape	Gorilla	Bebe	female	10595	Away	different	AD	0	0	3	11	0.776088	0	0
Ape	Gorilla	Bebe	female	10595	Away	different	AD	0	0	4	13	1.21256	0	0
Ape	Gorilla	Bebe	female	10595	Away	same	AS	0	1	3	12	0.994322	0	0
Ape	Gorilla	Bebe	female	10595	Away	same	AS	0	1	4	16	1.86726	0	0
Ape	Gorilla	Bebe	female	10595	Towards	different	TD	1	0	3	9	0.339619	0	0
Ape	Gorilla	Bebe	female	10595	Towards	different	TD	1	0	4	14	1.43079	0	0
Ape	Gorilla	Bebe	female	10595	Towards	same	TS	1	1	3	10	0.557853	0	0
Ape	Gorilla	Bebe	female	10595	Towards	same	TS	1	1	4	15	1.64903	0	0
Ape	Gorilla	Kibara	female	1602	Away	different	AD	0	0	1	4	-0.751553	1	2
Ape	Gorilla	Kibara	female	1602	Away	different	AD	0	0	2	8	0.121385	0	0
Ape	Gorilla	Kibara	female	1602	Away	same	AS	0	1	1	1	-1.40626	0	0
Ape	Gorilla	Kibara	female	1602	Away	same	AS	0	1	2	5	-0.533318	0	0
Ape	Gorilla	Kibara	female	1602	Towards	different	TD	1	0	1	3	-0.969787	1	0
Ape	Gorilla	Kibara	female	1602	Towards	different	TD	1	0	2	7	-0.0968496	1	0
Ape	Gorilla	Kibara	female	1602	Towards	same	TS	1	1	1	2	-1.18802	0	0
Ape	Gorilla	Kibara	female	1602	Towards	same	TS	1	1	2	6	-0.315084	0	0
Ape	Gorilla	Kibara	female	1603	Away	different	AD	0	0	3	12	0.994322	0	1
Ape	Gorilla	Kibara	female	1603	Away	different	AD	0	0	4	14	1.43079	0	0
Ape	Gorilla	Kibara	female	1603	Away	same	AS	0	1	3	10	0.557853	0	1
Ape	Gorilla	Kibara	female	1603	Away	same	AS	0	1	4	16	1.86726	0	1
Ape	Gorilla	Kibara	female	1603	Towards	different	TD	1	0	3	9	0.339619	0	0
Ape	Gorilla	Kibara	female	1603	Towards	different	TD	1	0	4	15	1.64903	0	1
Ape	Gorilla	Kibara	female	1603	Towards	same	TS	1	1	3	11	0.776088	0	0
Ape	Gorilla	Kibara	female	1603	Towards	same	TS	1	1	4	13	1.21256	0	0
Ape	Gorilla	Viringika	female	4759	Away	different	AD	0	0	1	4	-0.751553	0	0
Ape	Gorilla	Viringika	female	4759	Away	different	AD	0	0	2	6	-0.315084	0	0
Ape	Gorilla	Viringika	female	4759	Away	same	AS	0	1	1	3	-0.969787	0	1
Ape	Gorilla	Viringika	female	4759	Away	same	AS	0	1	2	5	-0.533318	0	0
Ape	Gorilla	Viringika	female	4759	Towards	different	TD	1	0	1	2	-1.18802	0	0
Ape	Gorilla	Viringika	female	4759	Towards	different	TD	1	0	2	8	0.121385	0	0
Ape	Gorilla	Viringika	female	4759	Towards	same	TS	1	1	1	1	-1.40626	0	1
Ape	Gorilla	Viringika	female	4759	Towards	same	TS	1	1	2	7	-0.0968496	0	0
Ape	Gorilla	Viringika	female	4760	Away	different	AD	0	0	3	12	0.994322	0	0
Ape	Gorilla	Viringika	female	4760	Away	different	AD	0	0	4	14	1.43079	0	0
Ape	Gorilla	Viringika	female	4760	Away	same	AS	0	1	3	11	0.776088	0	0
Ape	Gorilla	Viringika	female	4760	Away	same	AS	0	1	4	13	1.21256	0	0
Ape	Gorilla	Viringika	female	4760	Towards	different	TD	1	0	3	9	0.339619	1	0
Ape	Gorilla	Viringika	female	4760	Towards	different	TD	1	0	4	15	1.64903	1	0
Ape	Gorilla	Viringika	female	4760	Towards	same	TS	1	1	3	10	0.557853	0	0
Ape	Gorilla	Viringika	female	4760	Towards	same	TS	1	1	4	16	1.86726	0	1
Ape	Orangutan	Bimbo	male	10044	Away	different	AD	0	0	1	3	-0.969787	0	0
Ape	Orangutan	Bimbo	male	10044	Away	different	AD	0	0	2	7	-0.0968496	0	0
Ape	Orangutan	Bimbo	male	10044	Away	same	AS	0	1	1	2	-1.18802	0	0
Ape	Orangutan	Bimbo	male	10044	Away	same	AS	0	1	2	6	-0.315084	0	0
Ape	Orangutan	Bimbo	male	10044	Towards	different	TD	1	0	1	1	-1.40626	0	0
Ape	Orangutan	Bimbo	male	10044	Towards	different	TD	1	0	2	5	-0.533318	0	0
Ape	Orangutan	Bimbo	male	10044	Towards	same	TS	1	1	1	4	-0.751553	0	0
Ape	Orangutan	Bimbo	male	10044	Towards	same	TS	1	1	2	8	0.121385	0	0
Ape	Orangutan	Bimbo	male	10045	Away	different	AD	0	0	3	12	0.994322	0	0
Ape	Orangutan	Bimbo	male	10045	Away	different	AD	0	0	4	16	1.86726	0	1
Ape	Orangutan	Bimbo	male	10045	Away	same	AS	0	1	3	10	0.557853	0	1
Ape	Orangutan	Bimbo	male	10045	Away	same	AS	0	1	4	15	1.64903	0	0
Ape	Orangutan	Bimbo	male	10045	Towards	different	TD	1	0	3	9	0.339619	1	0
Ape	Orangutan	Bimbo	male	10045	Towards	different	TD	1	0	4	13	1.21256	0	0
Ape	Orangutan	Bimbo	male	10045	Towards	same	TS	1	1	3	11	0.776088	0	0
Ape	Orangutan	Bimbo	male	10045	Towards	same	TS	1	1	4	14	1.43079	0	0
Ape	Orangutan	Dokana	female	6989	Away	different	AD	0	0	1	3	-0.969787	0	0
Ape	Orangutan	Dokana	female	6989	Away	different	AD	0	0	2	7	-0.0968496	0	0
Ape	Orangutan	Dokana	female	6989	Away	same	AS	0	1	1	4	-0.751553	0	0
Ape	Orangutan	Dokana	female	6989	Away	same	AS	0	1	2	5	-0.533318	0	0
Ape	Orangutan	Dokana	female	6989	Towards	different	TD	1	0	1	1	-1.40626	0	0
Ape	Orangutan	Dokana	female	6989	Towards	different	TD	1	0	2	8	0.121385	0	0
Ape	Orangutan	Dokana	female	6989	Towards	same	TS	1	1	1	2	-1.18802	0	0
Ape	Orangutan	Dokana	female	6989	Towards	same	TS	1	1	2	6	-0.315084	0	0
Ape	Orangutan	Dokana	female	6990	Away	different	AD	0	0	3	12	0.994322	0	0
Ape	Orangutan	Dokana	female	6990	Away	different	AD	0	0	4	14	1.43079	0	0
Ape	Orangutan	Dokana	female	6990	Away	same	AS	0	1	3	11	0.776088	0	0
Ape	Orangutan	Dokana	female	6990	Away	same	AS	0	1	4	15	1.64903	0	0
Ape	Orangutan	Dokana	female	6990	Towards	different	TD	1	0	3	10	0.557853	1	0
Ape	Orangutan	Dokana	female	6990	Towards	different	TD	1	0	4	16	1.86726	0	0
Ape	Orangutan	Dokana	female	6990	Towards	same	TS	1	1	3	9	0.339619	0	0
Ape	Orangutan	Dokana	female	6990	Towards	same	TS	1	1	4	13	1.21256	0	0
Ape	Orangutan	Dunja	female	12755	Away	different	AD	0	0	1	3	-0.969787	1	0
Ape	Orangutan	Dunja	female	12755	Away	different	AD	0	0	2	5	-0.533318	0	0
Ape	Orangutan	Dunja	female	12755	Away	same	AS	0	1	1	2	-1.18802	0	0
Ape	Orangutan	Dunja	female	12755	Away	same	AS	0	1	2	8	0.121385	0	0
Ape	Orangutan	Dunja	female	12755	Towards	different	TD	1	0	1	1	-1.40626	1	0
Ape	Orangutan	Dunja	female	12755	Towards	different	TD	1	0	2	6	-0.315084	0	0
Ape	Orangutan	Dunja	female	12755	Towards	same	TS	1	1	1	4	-0.751553	0	0
Ape	Orangutan	Dunja	female	12755	Towards	same	TS	1	1	2	7	-0.0968496	0	0
Ape	Orangutan	Dunja	female	12756	Away	different	AD	0	0	3	11	0.776088	0	0
Ape	Orangutan	Dunja	female	12756	Away	different	AD	0	0	4	15	1.64903	1	0
Ape	Orangutan	Dunja	female	12756	Away	same	AS	0	1	3	10	0.557853	0	1
Ape	Orangutan	Dunja	female	12756	Away	same	AS	0	1	4	13	1.21256	0	0
Ape	Orangutan	Dunja	female	12756	Towards	different	TD	1	0	3	9	0.339619	0	0
Ape	Orangutan	Dunja	female	12756	Towards	different	TD	1	0	4	14	1.43079	1	1
Ape	Orangutan	Dunja	female	12756	Towards	same	TS	1	1	3	12	0.994322	0	0
Ape	Orangutan	Dunja	female	12756	Towards	same	TS	1	1	4	16	1.86726	0	0
Ape	Orangutan	Kila	female	2849	Away	different	AD	0	0	1	3	-0.969787	1	1
Ape	Orangutan	Kila	female	2849	Away	different	AD	0	0	2	6	-0.315084	0	0
Ape	Orangutan	Kila	female	2849	Away	same	AS	0	1	1	4	-0.751553	0	1
Ape	Orangutan	Kila	female	2849	Away	same	AS	0	1	2	8	0.121385	0	1
Ape	Orangutan	Kila	female	2849	Towards	different	TD	1	0	1	1	-1.40626	2	1
Ape	Orangutan	Kila	female	2849	Towards	different	TD	1	0	2	7	-0.0968496	0	1
Ape	Orangutan	Kila	female	2849	Towards	same	TS	1	1	1	2	-1.18802	2	1
Ape	Orangutan	Kila	female	2849	Towards	same	TS	1	1	2	5	-0.533318	1	0
Ape	Orangutan	Kila	female	2850	Away	different	AD	0	0	3	9	0.339619	2	0
Ape	Orangutan	Kila	female	2850	Away	different	AD	0	0	4	14	1.43079	0	0
Ape	Orangutan	Kila	female	2850	Away	same	AS	0	1	3	10	0.557853	1	1
Ape	Orangutan	Kila	female	2850	Away	same	AS	0	1	4	15	1.64903	0	0
Ape	Orangutan	Kila	female	2850	Towards	different	TD	1	0	3	11	0.776088	0	0
Ape	Orangutan	Kila	female	2850	Towards	different	TD	1	0	4	13	1.21256	0	1
Ape	Orangutan	Kila	female	2850	Towards	same	TS	1	1	3	12	0.994322	0	0
Ape	Orangutan	Kila	female	2850	Towards	same	TS	1	1	4	16	1.86726	0	0
Ape	Orangutan	Padana	female	3776	Away	different	AD	0	0	1	1	-1.40626	0	0
Ape	Orangutan	Padana	female	3776	Away	different	AD	0	0	2	7	-0.0968496	1	0
Ape	Orangutan	Padana	female	3776	Away	same	AS	0	1	1	3	-0.969787	0	1
Ape	Orangutan	Padana	female	3776	Away	same	AS	0	1	2	8	0.121385	0	0
Ape	Orangutan	Padana	female	3776	Towards	different	TD	1	0	1	4	-0.751553	0	0
Ape	Orangutan	Padana	female	3776	Towards	different	TD	1	0	2	5	-0.533318	2	1
Ape	Orangutan	Padana	female	3776	Towards	same	TS	1	1	1	2	-1.18802	0	0
Ape	Orangutan	Padana	female	3776	Towards	same	TS	1	1	2	6	-0.315084	0	0
Ape	Orangutan	Padana	female	3777	Away	different	AD	0	0	3	12	0.994322	1	0
Ape	Orangutan	Padana	female	3777	Away	different	AD	0	0	4	16	1.86726	0	0
Ape	Orangutan	Padana	female	3777	Away	same	AS	0	1	3	11	0.776088	0	0
Ape	Orangutan	Padana	female	3777	Away	same	AS	0	1	4	15	1.64903	0	0
Ape	Orangutan	Padana	female	3777	Towards	different	TD	1	0	3	10	0.557853	1	0
Ape	Orangutan	Padana	female	3777	Towards	different	TD	1	0	4	13	1.21256	0	0
Ape	Orangutan	Padana	female	3777	Towards	same	TS	1	1	3	9	0.339619	0	0
Ape	Orangutan	Padana	female	3777	Towards	same	TS	1	1	4	14	1.43079	0	0
Ape	Orangutan	Pini	female	7204	Away	different	AD	0	0	1	2	-1.18802	1	0
Ape	Orangutan	Pini	female	7204	Away	different	AD	0	0	2	7	-0.0968496	0	0
Ape	Orangutan	Pini	female	7204	Away	same	AS	0	1	1	4	-0.751553	0	0
Ape	Orangutan	Pini	female	7204	Away	same	AS	0	1	2	8	0.121385	0	0
Ape	Orangutan	Pini	female	7204	Towards	different	TD	1	0	1	3	-0.969787	0	0
Ape	Orangutan	Pini	female	7204	Towards	different	TD	1	0	2	6	-0.315084	1	0
Ape	Orangutan	Pini	female	7204	Towards	same	TS	1	1	1	1	-1.40626	0	0
Ape	Orangutan	Pini	female	7204	Towards	same	TS	1	1	2	5	-0.533318	1	1
Ape	Orangutan	Pini	female	7205	Away	different	AD	0	0	3	11	0.776088	1	0
Ape	Orangutan	Pini	female	7205	Away	different	AD	0	0	4	16	1.86726	0	0
Ape	Orangutan	Pini	female	7205	Away	same	AS	0	1	3	10	0.557853	0	0
Ape	Orangutan	Pini	female	7205	Away	same	AS	0	1	4	15	1.64903	0	0
Ape	Orangutan	Pini	female	7205	Towards	different	TD	1	0	3	9	0.339619	1	0
Ape	Orangutan	Pini	female	7205	Towards	different	TD	1	0	4	13	1.21256	1	0
Ape	Orangutan	Pini	female	7205	Towards	same	TS	1	1	3	12	0.994322	0	0
Ape	Orangutan	Pini	female	7205	Towards	same	TS	1	1	4	14	1.43079	0	0

## Sheet: Auditory
group	species	subj	sex	age	exp_ori	relPos	cond	exp_ori.code	relPos.code	sess	trial	z.trial	EXP	OTH	MID
Human	Human	222811	female	601	Away	different	AD	0	0	1	1	-1.40626	0	0	0
Human	Human	222811	female	601	Away	different	AD	0	0	2	8	0.121385	0	2	0
Human	Human	222811	female	601	Away	same	AS	0	1	1	3	-0.969787	3	0	0
Human	Human	222811	female	601	Away	same	AS	0	1	2	6	-0.315084	0	0	0
Human	Human	222811	female	601	Towards	different	TD	1	0	1	2	-1.18802	0	4	0
Human	Human	222811	female	601	Towards	different	TD	1	0	2	7	-0.0968496	0	2	0
Human	Human	222811	female	601	Towards	same	TS	1	1	1	4	-0.751553	0	0	0
Human	Human	222811	female	601	Towards	same	TS	1	1	2	5	-0.533318	8	0	0
Human	Human	222831	male	613	Away	different	AD	0	0	1	2	-1.18802	0	0	0
Human	Human	222831	male	613	Away	different	AD	0	0	2	7	-0.0968496	0	0	0
Human	Human	222831	male	613	Away	same	AS	0	1	1	4	-0.751553	8	0	0
Human	Human	222831	male	613	Away	same	AS	0	1	2	5	-0.533318	0	0	0
Human	Human	222831	male	613	Towards	different	TD	1	0	1	1	-1.40626	1	0	0
Human	Human	222831	male	613	Towards	same	TS	1	1	1	3	-0.969787	0	0	0
Human	Human	222831	male	613	Towards	same	TS	1	1	2	6	-0.315084	0	0	0
Human	Human	222961	female	620	Away	different	AD	0	0	1	3	-0.969787	2	0	0
Human	Human	222961	female	620	Away	different	AD	0	0	2	6	-0.315084	0	2	0
Human	Human	222961	female	620	Away	same	AS	0	1	1	2	-1.18802	3	0	0
Human	Human	222961	female	620	Away	same	AS	0	1	2	7	-0.0968496	0	1	0
Human	Human	222961	female	620	Towards	different	TD	1	0	1	1	-1.40626	1	2	0
Human	Human	222961	female	620	Towards	different	TD	1	0	2	8	0.121385	0	0	0
Human	Human	222961	female	620	Towards	same	TS	1	1	1	4	-0.751553	1	1	0
Human	Human	222961	female	620	Towards	same	TS	1	1	2	5	-0.533318	0	0	0
Human	Human	224591	male	620	Away	different	AD	0	0	1	4	-0.751553	1	0	0
Human	Human	224591	male	620	Away	different	AD	0	0	2	5	-0.533318	0	2	0
Human	Human	224591	male	620	Away	same	AS	0	1	1	2	-1.18802	0	0	0
Human	Human	224591	male	620	Away	same	AS	0	1	2	7	-0.0968496	0	0	0
Human	Human	224591	male	620	Towards	different	TD	1	0	1	1	-1.40626	1	2	0
Human	Human	224591	male	620	Towards	different	TD	1	0	2	8	0.121385	2	0	0
Human	Human	224591	male	620	Towards	same	TS	1	1	1	3	-0.969787	0	0	0
Human	Human	224591	male	620	Towards	same	TS	1	1	2	6	-0.315084	3	0	0
Human	Human	225971	male	595	Away	different	AD	0	0	1	4	-0.751553	0	0	0
Human	Human	225971	male	595	Away	different	AD	0	0	2	5	-0.533318	0	0	0
Human	Human	225971	male	595	Away	same	AS	0	1	1	1	-1.40626	0	0	0
Human	Human	225971	male	595	Away	same	AS	0	1	2	8	0.121385	0	0	0
Human	Human	225971	male	595	Towards	different	TD	1	0	1	2	-1.18802	0	0	0
Human	Human	225971	male	595	Towards	different	TD	1	0	2	7	-0.0968496	3	0	0
Human	Human	225971	male	595	Towards	same	TS	1	1	1	3	-0.969787	0	0	0
Human	Human	225971	male	595	Towards	same	TS	1	1	2	6	-0.315084	0	0	0
Human	Human	226031	female	623	Away	different	AD	0	0	1	4	-0.751553	0	1	0
Human	Human	226031	female	623	Away	different	AD	0	0	2	5	-0.533318	0	1	0
Human	Human	226031	female	623	Away	same	AS	0	1	1	2	-1.18802	3	0	0
Human	Human	226031	female	623	Away	same	AS	0	1	2	7	-0.0968496	0	0	0
Human	Human	226031	female	623	Towards	different	TD	1	0	1	3	-0.969787	5	0	0
Human	Human	226031	female	623	Towards	different	TD	1	0	2	6	-0.315084	0	4	0
Human	Human	226031	female	623	Towards	same	TS	1	1	1	1	-1.40626	9	0	0
Human	Human	226761	female	616	Away	different	AD	0	0	1	2	-1.18802	2	1	0
Human	Human	226761	female	616	Away	same	AS	0	1	1	3	-0.969787	0	0	0
Human	Human	226761	female	616	Towards	different	TD	1	0	1	4	-0.751553	0	0	0
Human	Human	226761	female	616	Towards	same	TS	1	1	1	1	-1.40626	0	0	0
Human	Human	226791	female	611	Away	different	AD	0	0	1	2	-1.18802	2	0	0
Human	Human	226791	female	611	Away	same	AS	0	1	1	3	-0.969787	0	0	0
Human	Human	226791	female	611	Towards	different	TD	1	0	1	1	-1.40626	0	0	0
Human	Human	226791	female	611	Towards	same	TS	1	1	1	4	-0.751553	0	0	0
Human	Human	226991	female	594	Away	different	AD	0	0	1	3	-0.969787	0	0	0
Human	Human	226991	female	594	Away	different	AD	0	0	2	6	-0.315084	0	1	0
Human	Human	226991	female	594	Away	same	AS	0	1	1	4	-0.751553	0	0	0
Human	Human	226991	female	594	Away	same	AS	0	1	2	5	-0.533318	1	0	0
Human	Human	226991	female	594	Towards	different	TD	1	0	1	2	-1.18802	0	1	0
Human	Human	226991	female	594	Towards	different	TD	1	0	2	7	-0.0968496	0	0	0
Human	Human	226991	female	594	Towards	same	TS	1	1	1	1	-1.40626	0	0	0
Human	Human	226991	female	594	Towards	same	TS	1	1	2	8	0.121385	0	0	0
Human	Human	227711	female	602	Away	different	AD	0	0	1	4	-0.751553	1	1	0
Human	Human	227711	female	602	Away	different	AD	0	0	2	5	-0.533318	0	0	0
Human	Human	227711	female	602	Away	same	AS	0	1	1	1	-1.40626	0	1	0
Human	Human	227711	female	602	Away	same	AS	0	1	2	8	0.121385	2	0	0
Human	Human	227711	female	602	Towards	different	TD	1	0	1	3	-0.969787	4	0	0
Human	Human	227711	female	602	Towards	different	TD	1	0	2	6	-0.315084	0	0	0
Human	Human	227711	female	602	Towards	same	TS	1	1	1	2	-1.18802	1	0	0
Human	Human	227711	female	602	Towards	same	TS	1	1	2	7	-0.0968496	0	1	0
Human	Human	228261	male	602	Away	different	AD	0	0	1	1	-1.40626	0	0	0
Human	Human	228261	male	602	Away	same	AS	0	1	1	4	-0.751553	0	0	0
Human	Human	228261	male	602	Away	same	AS	0	1	2	5	-0.533318	0	0	0
Human	Human	228261	male	602	Towards	different	TD	1	0	1	3	-0.969787	0	0	0
Human	Human	228261	male	602	Towards	same	TS	1	1	1	2	-1.18802	0	0	1
Human	Human	228341	male	593	Away	different	AD	0	0	1	3	-0.969787	4	0	0
Human	Human	228341	male	593	Away	different	AD	0	0	2	6	-0.315084	6	3	0
Human	Human	228341	male	593	Away	same	AS	0	1	1	1	-1.40626	3	0	0
Human	Human	228341	male	593	Away	same	AS	0	1	2	8	0.121385	1	0	0
Human	Human	228341	male	593	Towards	different	TD	1	0	1	2	-1.18802	9	1	0
Human	Human	228341	male	593	Towards	different	TD	1	0	2	7	-0.0968496	4	4	0
Human	Human	228341	male	593	Towards	same	TS	1	1	1	4	-0.751553	0	0	0
Human	Human	228341	male	593	Towards	same	TS	1	1	2	5	-0.533318	5	0	0
Human	Human	228351	male	602	Away	different	AD	0	0	1	2	-1.18802	1	0	0
Human	Human	228351	male	602	Away	different	AD	0	0	2	7	-0.0968496	1	0	0
Human	Human	228351	male	602	Away	same	AS	0	1	1	4	-0.751553	0	2	0
Human	Human	228351	male	602	Away	same	AS	0	1	2	5	-0.533318	3	0	0
Human	Human	228351	male	602	Towards	different	TD	1	0	1	3	-0.969787	1	1	0
Human	Human	228351	male	602	Towards	different	TD	1	0	2	6	-0.315084	2	0	0
Human	Human	228351	male	602	Towards	same	TS	1	1	1	1	-1.40626	5	0	0
Human	Human	228351	male	602	Towards	same	TS	1	1	2	8	0.121385	1	1	0
Human	Human	228501	male	601	Away	different	AD	0	0	1	1	-1.40626	1	3	0
Human	Human	228501	male	601	Away	same	AS	0	1	1	2	-1.18802	0	0	0
Human	Human	228501	male	601	Away	same	AS	0	1	2	7	-0.0968496	2	0	0
Human	Human	228501	male	601	Towards	different	TD	1	0	1	4	-0.751553	3	4	0
Human	Human	228501	male	601	Towards	different	TD	1	0	2	6	-0.315084	3	1	0
Human	Human	228501	male	601	Towards	same	TS	1	1	1	3	-0.969787	5	0	0
Human	Human	228501	male	601	Towards	same	TS	1	1	2	5	-0.533318	5	4	0
Human	Human	228571	female	608	Away	different	AD	0	0	1	3	-0.969787	3	0	0
Human	Human	228571	female	608	Away	different	AD	0	0	2	6	-0.315084	2	0	0
Human	Human	228571	female	608	Away	same	AS	0	1	1	4	-0.751553	0	0	0
Human	Human	228571	female	608	Away	same	AS	0	1	2	5	-0.533318	0	0	0
Human	Human	228571	female	608	Towards	different	TD	1	0	1	1	-1.40626	0	0	0
Human	Human	228571	female	608	Towards	different	TD	1	0	2	8	0.121385	1	0	0
Human	Human	228571	female	608	Towards	same	TS	1	1	1	2	-1.18802	0	0	0
Human	Human	228571	female	608	Towards	same	TS	1	1	2	7	-0.0968496	1	0	0
Human	Human	228831	male	602	Away	different	AD	0	0	1	3	-0.969787	0	0	0
Human	Human	228831	male	602	Away	same	AS	0	1	1	1	-1.40626	0	0	0
Human	Human	228831	male	602	Towards	different	TD	1	0	1	4	-0.751553	1	0	0
Human	Human	228831	male	602	Towards	different	TD	1	0	2	5	-0.533318	0	0	0
Human	Human	228831	male	602	Towards	same	TS	1	1	1	2	-1.18802	1	0	0
Human	Human	229041	male	601	Away	different	AD	0	0	1	1	-1.40626	1	0	0
Human	Human	229041	male	601	Away	different	AD	0	0	2	8	0.121385	0	0	0
Human	Human	229041	male	601	Away	same	AS	0	1	1	4	-0.751553	0	0	0
Human	Human	229041	male	601	Away	same	AS	0	1	2	5	-0.533318	1	0	0
Human	Human	229041	male	601	Towards	different	TD	1	0	1	2	-1.18802	0	0	0
Human	Human	229041	male	601	Towards	different	TD	1	0	2	7	-0.0968496	2	1	0
Human	Human	229041	male	601	Towards	same	TS	1	1	1	3	-0.969787	4	0	0
Human	Human	229041	male	601	Towards	same	TS	1	1	2	6	-0.315084	2	0	0
Human	Human	229151	female	596	Away	different	AD	0	0	1	1	-1.40626	2	0	0
Human	Human	229151	female	596	Away	same	AS	0	1	1	3	-0.969787	6	0	0
Human	Human	229151	female	596	Towards	different	TD	1	0	1	4	-0.751553	8	0	0
Human	Human	229151	female	596	Towards	same	TS	1	1	1	2	-1.18802	9	0	0
Human	Human	230481	female	606	Away	different	AD	0	0	1	4	-0.751553	0	0	0
Human	Human	230481	female	606	Away	different	AD	0	0	2	5	-0.533318	0	0	0
Human	Human	230481	female	606	Away	same	AS	0	1	1	3	-0.969787	0	0	0
Human	Human	230481	female	606	Away	same	AS	0	1	2	6	-0.315084	0	0	0
Human	Human	230481	female	606	Towards	different	TD	1	0	1	1	-1.40626	0	0	0
Human	Human	230481	female	606	Towards	different	TD	1	0	2	7	-0.0968496	0	0	0
Human	Human	230481	female	606	Towards	same	TS	1	1	1	2	-1.18802	0	0	0
Human	Human	230741	male	612	Away	different	AD	0	0	1	4	-0.751553	0	0	0
Human	Human	230741	male	612	Away	different	AD	0	0	2	5	-0.533318	0	0	0
Human	Human	230741	male	612	Away	same	AS	0	1	1	3	-0.969787	2	0	0
Human	Human	230741	male	612	Towards	different	TD	1	0	1	2	-1.18802	0	0	0
Human	Human	230741	male	612	Towards	same	TS	1	1	1	1	-1.40626	3	1	0
Human	Human	232261	male	613	Away	different	AD	0	0	1	3	-0.969787	3	0	0
Human	Human	232261	male	613	Away	different	AD	0	0	2	6	-0.315084	0	0	0
Human	Human	232261	male	613	Away	same	AS	0	1	1	2	-1.18802	0	3	0
Human	Human	232261	male	613	Towards	different	TD	1	0	1	4	-0.751553	5	3	0
Human	Human	232261	male	613	Towards	different	TD	1	0	2	5	-0.533318	3	0	0
Human	Human	232261	male	613	Towards	same	TS	1	1	1	1	-1.40626	0	0	0
Human	Human	233831	female	612	Away	different	AD	0	0	1	2	-1.18802	0	5	0
Human	Human	233831	female	612	Away	different	AD	0	0	2	7	-0.0968496	0	2	0
Human	Human	233831	female	612	Away	same	AS	0	1	1	1	-1.40626	2	0	0
Human	Human	233831	female	612	Away	same	AS	0	1	2	8	0.121385	0	0	0
Human	Human	233831	female	612	Towards	different	TD	1	0	1	4	-0.751553	0	1	0
Human	Human	233831	female	612	Towards	different	TD	1	0	2	5	-0.533318	1	0	0
Human	Human	233831	female	612	Towards	same	TS	1	1	1	3	-0.969787	5	1	0
Human	Human	233831	female	612	Towards	same	TS	1	1	2	6	-0.315084	1	0	0
Human	Human	236642	male	620	Away	different	AD	0	0	1	1	-1.40626	1	0	0
Human	Human	236642	male	620	Away	same	AS	0	1	1	2	-1.18802	0	0	0
Human	Human	236642	male	620	Away	same	AS	0	1	2	7	-0.0968496	0	0	0
Human	Human	236642	male	620	Towards	different	TD	1	0	1	3	-0.969787	4	0	0
Human	Human	236642	male	620	Towards	different	TD	1	0	2	6	-0.315084	2	0	0
Human	Human	236642	male	620	Towards	same	TS	1	1	1	4	-0.751553	0	0	0
Human	Human	236642	male	620	Towards	same	TS	1	1	2	5	-0.533318	5	3	0
Human	Human	236889	female	600	Away	different	AD	0	0	1	2	-1.18802	0	0	0
Human	Human	236889	female	600	Away	different	AD	0	0	2	7	-0.0968496	0	0	0
Human	Human	236889	female	600	Away	same	AS	0	1	1	1	-1.40626	0	0	0
Human	Human	236889	female	600	Away	same	AS	0	1	2	8	0.121385	0	0	0
Human	Human	236889	female	600	Towards	different	TD	1	0	1	3	-0.969787	0	0	0
Human	Human	236889	female	600	Towards	different	TD	1	0	2	6	-0.315084	0	0	0
Human	Human	236889	female	600	Towards	same	TS	1	1	1	4	-0.751553	0	0	0
Human	Human	236889	female	600	Towards	same	TS	1	1	2	5	-0.533318	0	0	0
Ape	Bonobo	Joey	male	9228	Away	different	AD	0	0	1	1	-1.40626	0	1	0
Ape	Bonobo	Joey	male	9228	Away	different	AD	0	0	2	6	-0.315084	0	0	0
Ape	Bonobo	Joey	male	9228	Away	same	AS	0	1	1	4	-0.751553	1	0	0
Ape	Bonobo	Joey	male	9228	Away	same	AS	0	1	2	8	0.121385	0	0	0
Ape	Bonobo	Joey	male	9228	Towards	different	TD	1	0	1	2	-1.18802	0	0	0
Ape	Bonobo	Joey	male	9228	Towards	different	TD	1	0	2	5	-0.533318	0	0	0
Ape	Bonobo	Joey	male	9228	Towards	same	TS	1	1	1	3	-0.969787	0	0	0
Ape	Bonobo	Joey	male	9228	Towards	same	TS	1	1	2	7	-0.0968496	0	0	0
Ape	Bonobo	Joey	male	9229	Away	different	AD	0	0	3	11	0.776088	0	0	0
Ape	Bonobo	Joey	male	9229	Away	different	AD	0	0	4	14	1.43079	0	0	0
Ape	Bonobo	Joey	male	9229	Away	same	AS	0	1	3	12	0.994322	1	0	0
Ape	Bonobo	Joey	male	9229	Away	same	AS	0	1	4	15	1.64903	1	0	0
Ape	Bonobo	Joey	male	9229	Towards	different	TD	1	0	3	10	0.557853	0	1	0
[truncated: 499 more rows]

## Sheet: Visual
group	species	subj	sex	age	exp_ori	relPos	cond	exp_ori.code	relPos.code	sess	trial	z.trial	EXP	OTH	MID
[truncated: 676 more rows]

[truncated: 1 more sheets: Pointing]
